# Supplementary material for: Parallel synthesis and biological evolution of quinic acid derivatives as immuno-suppressing agents against T-cell receptors
Source: Royal Society of Chemistry journal article supplement (doi:10.1039/c5ra06095h), 2015-01-01
Supplement: c5ra06095h1.pdf [file c5ra06095h1.pdf]

## **Parallel Synthesis and Biological Evolution of Quinic Acid Derivatives as Immuno-suppressing Agents against T-cell Receptors**

Chih-Yu Huang<sup>1</sup>, Li-Hsun Chen<sup>2</sup>, Hsuan-Yu Huang<sup>1</sup>, Feng-Sheng Kao<sup>1</sup>, Yun-Ta Lee<sup>2,3</sup>,  
Manikandan Selvaraju<sup>2</sup>, Chung-Ming Sun<sup>2,3\*</sup> and Hueih-Min Chen<sup>1\*</sup>

<sup>1</sup>*National Applied Research Laboratories, National Nano Device Laboratories, Biomedical Group, Hsinchu 300-10, Taiwan.*

<sup>2</sup>*Department of Applied Chemistry, National Chiao-Tung University, Hsinchu 300-10, Taiwan.*

<sup>3</sup>*Department of Medicinal and Applied Chemistry, Kaohsiung Medical University, 100, Shih-Chuan 1<sup>st</sup> Road, Kaohsiung 807-08, Taiwan.*

\* To whom correspondence should be addressed.

E-mail: [hmchen@narlabl.org.tw](mailto:hmchen@narlabl.org.tw); [cmsun@mail.nctu.edu.tw](mailto:cmsun@mail.nctu.edu.tw)

## **General experimental methods:**

Methanol, dichloromethane and acetone were distilled before use. All reactions were performed under an inert atmosphere with unpurified reagents and dry solvents. Analytical thin-layer chromatography (TLC) was performed using 0.25 mm silica gel coated plates. Flash chromatography was performed using the indicated solvent and silica gel 60 (230-400 mesh). All the microwave experiments were performed in CEM microwave reactor under optimized reaction conditions of power and pressure. <sup>1</sup>H NMR (300 MHz) and <sup>13</sup>C NMR (75 MHz) spectra were recorded on a 300 MHz spectrometer. Chemical shifts are reported in parts per million (ppm) on the scale from an internal standard.

## **Biological Methods:**

*Materials-* Jurkat human acute T-cell leukemia line was obtained from Bioresource Collection and Research Center (BCRC, Hsinchu, Taiwan). RPMI-1640 medium was purchased from HyClone (Logan, UT, USA). Five-week-old female BALB/c mice were purchased from BioLASCO (Yilan, Taiwan). Fetal bovine serum (FBS) was purchased from Biological Industries (Haemek, Israel). Penicillin–Streptomycin–Neomycin (PSN) Antibiotic Mixture was purchased from Gibco BRL (Rockville, MD, USA). ELISA kits for human IL-2 and mouse IgG/IgE were obtained from R&D Systems (Minneapolis, MN, USA) and Bethyl (Montgomery, TX, USA), respectively. Anti-IL-2 mAb was supplied by R&D Systems (Minneapolis, MN, USA). Anti-human CD28 antibody and anti-human CD3 antibody were purchased from BioLegend (San Diego, CA, USA). 3-[4,5-Dimethylthiazol-2-yl]-2,5-diphenyl tetrazolium bromide (MTT), ovalbumin (OVA; albumin from chicken egg white), complete Freund's adjuvant, heparin sodium salt from porcine intestinal mucosa and

3,3',5,5' tetramethylbenzidine (TMB) liquid substrate system for ELISA were purchased from Sigma (St. Louis, MO, USA). [3-(2-aminoethylamino)propyl] trimethoxy silane (3-APTMS) (99%), glutaraldehyde (25%) and bovine serum albumin (BSA) were obtained from Sigma Aldrich (St. Louis, MO, USA). Both CD28 and CD80 receptors were from ID Labs (London, ON, Canada). Cynarin was purchased from AppliChem (Darmstadt, Germany). Silicon-made tips for AFM (NanoWizard, JPK Instruments, Berlin, Germany) imaging and force measurement were ordered from Nanosensor (Neuchatel, Switzerland). Water used in this study was de-ionized and distilled.

*MTT colorimetric assay*- Cytotoxicity of Cyn and Cyn-1324 on T-cells were investigated by MTT colorimetric assay. Jurkat T-cells ( $5 \times 10^5$  cells/ml; 100  $\mu$ L) were incubated with different concentrations of compounds for 24 h at 37°C. Cell solutions were then centrifuged at 200g for 10 min and the supernatants were removed. 200  $\mu$ L MTT (0.5 mg/mL in culture medium) was then added and the cell solutions were incubated again for 4 h at 37 °C. 200  $\mu$ L DMSO lysis buffer was added into the cell mediums and the concentrations of dissolved MTT crystals were measured by plate reader (Dynatech, Chantilly, VA, USA) at 560 nm. The survival rate (%) were determined as follows:  $OD_{560nm}$  of testing sample (cells with derivatives)/ $OD_{560nm}$  of control (cells without derivatives)  $\times 100\%$ .

*Stimulation of T-Cells*- Jurkat T-cells were maintained in a humidified atmosphere of 5% CO<sub>2</sub>/95% air at 37 °C in RPMI-1640 medium including penicillin, streptomycin and 10% heat-inactivated FBS. In present experiments, Signal 1 and Signal 2 were stimulated *via* addition of anti-CD3 and anti-CD28, respectively. Flat-bottom 96-well plates were coated with 1  $\mu$ g/mL of anti-CD3 for 24 h at 4 °C. Wells including

anti-CD3 were then washed twice with phosphate-buffered saline (PBS) to remove unbound anti-CD3. Jurkat T-cells (200  $\mu$ L,  $2 \times 10^6$  cells/mL) with or without Cyn-1324 (PBS buffer only; control group) were then added to the wells. Cells were activated by anti-CD3 in wells for 15 min (Signal 1 stimulation). Consequently, anti-CD28 (1  $\mu$ g/mL) was then added into the wells (for Signal 2 stimulation) or PBS buffer only (for Signal 1 stimulation only) for 24 h at 37  $^{\circ}$ C. IL-2 release from stimulated T-cells (100  $\mu$ L) was then measured by enzyme-linked immunosorbent assay (ELISA; see below section for detail).

*IL-2 measurement-* A 96-well flat-bottom plate was coated with anti-IL-2 mAb (100  $\mu$ L at 4  $\mu$ g/mL) in PBS (pH 7.3) at room temperature overnight. The plate was washed three times with 300  $\mu$ L of PBS containing 0.05% Tween 20 (PBST) and was incubated for more than 1 h with a blocking solution containing 1% bovine serum albumin in PBS. After plates were washed again with PBS-T, 100  $\mu$ L of testing sample (T-cell incubation medium) and 100  $\mu$ L of biotinylated anti-IL-2 detection antibodies (400 ng/mL) were added and incubated for 2 h at room temperature. Finally, 100  $\mu$ L of streptavidin horseradish peroxidase (1/2,000 dilution of a 1.25 mg/mL solution) and 100  $\mu$ L of substrate solution containing  $H_2O_2$  and tetramethylbenzidine (1:1 v/v) were added for 20 min in the dark at room temperature. The reaction was terminated by the addition of 50  $\mu$ L stop solution (1.0 M  $H_2SO_4$ ). The optical density of each well at 450 nm was determined using a microplate reader. Inhibited amount of IL-2 expressed from Signal 2 of T-cells was normalized by relative percentage as follows:  $OD_{450nm}$  of tested sample ( $OD_{450nm}$  of Signal 1 plus Signal 2 stimulation with Cyn-1324 minus  $OD_{450nm}$  of Signal 1 stimulation only) /  $OD_{450nm}$  of control ( $OD_{450nm}$  of Signal 1 plus Signal 2 stimulation without Cyn-1324

minus  $OD_{450nm}$  of Signal 1 stimulation only)  $\times 100\%$ .

*Immobilization of proteins on tip and chip-* Protein (CD28)-protein (CD80) interaction and interruption (by Cyn-1324) can be *in vitro* investigated by using atomic force spectroscopy. Binding force measurement is established by immobilizing one protein (CD80) on AFM tip (called afm-CD8) and another protein (CD28) on silicon chip (called chip-CD28). The procedures were followed: (a) afm-CD80. AFM tips were cleaned by oxygen plasma cleaner (PCD 150, Taiwan) under 250 mTorr and 80 W for 2 min and immersed in piranha solution ( $H_2SO_4 : H_2O_2 = 3 : 1$  (v/v)) for 10 min to remove micro-particles, metal ions, and other organic materials. A self-assembled monolayer (SAM) on the tips was formed by incubation with 3-APTMS (1%) in ethanol for 1 h. After washing the 3-APTMS-coated tips with ethanol/water several times, 2.5% glutaraldehyde (a common cross-linking protein) solution was added and the tips were incubated for 1 h. The unbounded glutaraldehyde was removed by rinsing with water. The treated tips were then inserted into CD80 solution (100  $\mu\text{g/mL}$ ) and incubated overnight at 4  $^{\circ}\text{C}$ . (b) chip-CD28,  $SiO_2$  wafer was heated in a horizontal furnace to 1,050  $^{\circ}\text{C}$ . After cutting heated wafer into pieces, similar steps (treating 3-APTMS until adding glutaraldehyde) as shown above were done on chips. These treated chips were then incubated with CD28 solution (25  $\mu\text{g/mL}$ ) for 30 min at room temperature. A 40  $\mu\text{g/mL}$  BSA solution was added to both treated tips (afm-CD80) and chips (chip-CD28) to fill-up the vacant space on their surfaces. Washing with NaOH (0.05M) was performed before experiments.

*Atomic force spectroscopy (AFM) measurement-* Current unbinding force ( $F_u$ ) measurement *via* AFM between chip-CD28 and afm-CD80 can be empirically

described as:  $F_u = (k_B T / x_\beta) \ln(r x_\beta / k_{off} k_B T)$  (Eq. 1), where  $k_B$ ,  $T$ ,  $x_\beta$ ,  $r$  and  $k_{off}$  indicate Boltzmann constant, absolute temperature (K), distance between energy potential minimum and energy barrier maximum, loading rate and dissociation rate (off rate), respectively (19-21). The loading rate ( $r$ ) can be defined as the rate of force applied to the bond between proteins (e.g.,  $r = \text{pulling velocity} \times \text{effective spring constant}$ ). Due to Eq. 1,  $F_u$  is proportional to the logarithm of  $r$ . Therefore, selection of an optimum loading rate for measurement of the unbinding forces among proteins may be essential. Upon the loading rate being determined,  $F_u$  was measured for the interaction between afm-CD80 and chip-CD28 at more than 200 different locations. To measure the blocking effect of Cyn-1324 on the binding between chip-CD28 and afm-CD80, procedures followed: (a) Cyn-1324 solution (500  $\mu\text{g/mL}$ ) was added to the treated chip (including chip-CD28) and incubated for 30 min. The chip including chip-CD28/Cyn-1324 was then washed with PBS buffer; (b) The treated chip (including chip-CD28/Cyn-1324) was then examined by binding with afm-CD80 on AFM tip. Both force curves and unbinding forces were recorded and calculated by using AFM.

*Animal immunization and treatment-* (a) *efficacy test-* BALB/c mice (twelve-week-old; n=20) were divided by four groups (5/per group): n1 group (PBS buffer only; control group), n2 group (OVA only), n3 group (OVA/Cyn-1324) and n4 group (OVA/CSA). For n2 group, mice were immunized with 50  $\mu\text{g}$  OVA (in emulsion of a complete Freund's adjuvant) at day\_0 and 50  $\mu\text{g}$  OVA (in PBS buffer) from day\_7 to day\_35 by intraperitoneally injecting weekly. Concurrently, n1 (PBS only), n3 (Cyn-1324; 14mg/kg) and n4 (CSA, 50mg/kg) groups were intraperitoneally injected weekly from day\_0 to day\_35. After immunization, mice bloods were collected weekly from tail

veins and analyzed by ELISA (see section below for detail). (b) *toxicity test*- BALB/c mice (4 groups; 5/per group) were intraperitoneally injected three times/per week (group\_1: treated with PBS after OVA-sentitization; group\_2: treated with Cyn-1324 after OVA-sentitization; group\_3: treated with CSA after OVA-sentitization and group\_4: control group without immunization). Doses used were increasingly changed every two-week from 50 to 400 mg/kg. Mice body weight and mortality were recorded weekly and daily, respectively.

*Serum sample preparation and test*- (a) *sample preparation*- Blood collected from mice above were transferred to heparinized tubes and centrifuged at 4,000g for 5 min. Supernatant serums were collected and stored at  $-80^{\circ}\text{C}$  for later experiments. For IgG detection, serum samples were melted and diluted to  $10^5$ -fold by diluent buffer (1% BSA with 0.05% Tween 20 in PBS buffer). For IgE test, the sample medium was diluted to only 10-fold. (b) *ELISA test*- Flat-bottomed microtitre plates were coated overnight with 100  $\mu\text{L}$  diluted coating antibody (1  $\mu\text{L}$  antibody plus PBS buffer to total 100  $\mu\text{L}$ ) to each well and washed five times with PBS containing 0.05% Tween 20 (PBS/T). Blocking was done by using block solution (1% BSA in PBS buffer). The plates were then incubated at room temperature for 1 h and washed again by PBS/T buffer. Afterward, serum samples above were added into plates and incubated at room temperature for 1 h. After washing, 100  $\mu\text{L}$  HP-conjugated mouse IgG (or IgE) detection antibody (x75,000) in sample diluent was added. Plates were again incubated for 1 h and washed. 100  $\mu\text{L}$  TMB substrate solution was added. After 15 min, the reaction was stopped by addition of 50  $\mu\text{L}$  stop solution (1M  $\text{H}_2\text{SO}_4$ ). The absorbance was determined at 450 nm. Standard curves (IgG/IgE) were obtained by using known concentrations of IgG (9–500 ng/mL) and IgE (4–250 ng/mL). By using

these standard curves, quantities of IgG and IgE from unknown samples can be obtained.

## **Experimental Section**

### **General procedure for the synthesis of**

**(3a*R*,5*R*,7*R*,7a*S*)-5,7-dihydroxy-2,2-dimethyl-*N*-(2-phenylethyl)hexahydro-1,3-benzodioxole-5-carboxamide (3a).**

#### **Spectral data**

**(3a*R*,5*R*,7*R*,7a*S*)-5,7-dihydroxy-2,2-dimethyl-*N*-(2-phenylethyl)hexahydro-1,3-benzodioxole-5-carboxamide (3a)**

<sup>1</sup>H NMR (300 MHz, CDCl<sub>3</sub>) δ 7.32 – 7.19 (m, 5H), 7.07 (t, *J* = 5.6 Hz, 1H), 4.86 (s, 1H), 4.60 – 4.43 (m, 1H), 4.18 – 4.07 (m, 1H), 3.83 – 3.79 (m, 1H), 3.52 (dd, *J* = 13.2, 6.8 Hz, 2H), 3.39 (s, 1H), 2.90 – 2.73 (m, 1H), 2.44 – 2.31 (m, 1H), 2.23 – 2.11 (m, 1H), 2.05 – 1.88 (m, 2H), 1.48 (s, 3H), 1.33 (s, 3H); <sup>13</sup>C NMR (75 MHz, CDCl<sub>3</sub>) δ 176.6, 138.5, 128.8, 128.7, 126.7, 108.7, 76.1, 72.9, 72.1, 65.9, 40.5, 37.0, 35.6, 34.4, 27.1, 24.4; MS (EI) 335.2; HRMS (EI) calcd. for C<sub>18</sub>H<sub>25</sub>NO<sub>5</sub> 335.1733; found 335.1729; IR (cm<sup>-1</sup>, neat) 3359, 1644.

**(3a*R*,5*R*,7*R*,7a*S*)-5,7-dihydroxy-2,2-dimethyl-*N*-(3-methylbutyl)hexahydro-1,3-benzodioxole-5-carboxamide (3b)**



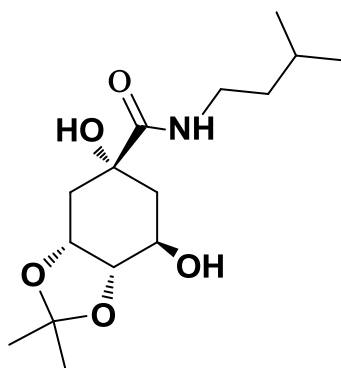

$^1\text{H}$  NMR (300 MHz,  $\text{CDCl}_3$ )  $\delta$  6.97 (s, 1H), 4.97 (s, 1H), 4.63 – 4.34 (m, 1H), 4.10 (d,  $J = 3.9$  Hz, 1H), 3.78 (s, 1H), 3.46 (s, 1H), 3.31 – 3.15 (m, 2H), 2.38 (dd,  $J = 15.6, 2.1$  Hz, 1H), 2.18 (dd,  $J = 14.8, 5.1$  Hz, 1H), 1.98 (ddd,  $J = 14.6, 8.9, 2.7$  Hz, 2H), 1.65 – 1.49 (m, 1H), 1.46 (s, 3H), 1.38 (dd,  $J = 14.5, 7.2$  Hz, 2H), 1.30 (s, 3H), 0.87 (d,  $J = 6.6$  Hz, 6H);  $^{13}\text{C}$  NMR (75 MHz,  $\text{CDCl}_3$ );  $\delta$  176.4, 108.6, 76.1, 72.8, 72.1, 65.9, 38.2, 37.7, 37.1, 34.4, 27.1, 25.9, 24.4, 22.5; MS (EI) 301.3; HRMS (EI) calcd. for  $\text{C}_{15}\text{H}_{27}\text{NO}_5$  301.1889; found 301.1887; IR ( $\text{cm}^{-1}$ , neat) 3399, 1646.

**(3aR,5R,7R,7aS)-5,7-dihydroxy-N-(3-methoxypropyl)-2,2-dimethylhexahydro-1,3-benzodioxole-5-carboxamide (3c)**

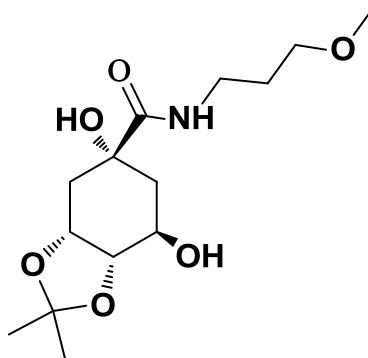

$^1\text{H}$  NMR (300 MHz,  $\text{CDCl}_3$ )  $\delta$  7.43 (s, 1H), 4.96 (s, 1H), 4.64 – 4.52 (m, 1H), 4.21 – 4.10 (m, 1H), 3.80 (s, 1H), 3.47 (t,  $J = 5.8$  Hz, 2H), 3.43 – 3.35 (m, 2H), 3.34 (s, 3H), 2.43 (dd,  $J = 15.6, 2.4$  Hz, 1H), 2.26 (ddd,  $J = 15.0, 5.1, 1.5$  Hz, 1H), 2.03 (ddd,  $J = 14.9, 9.0, 3.0$  Hz, 2H), 1.84 – 1.76 (m, 2H), 1.50 (s, 3H), 1.34 (s, 3H);  $^{13}\text{C}$  NMR (75 MHz,  $\text{CDCl}_3$ )  $\delta$  176.6, 108.7, 76.0, 72.8, 72.1, 71.3, 65.9, 58.9, 37.8, 37.1, 34.4, 29.0, 27.1, 24.4; MS (EI) 303.2; HRMS (EI) calcd. for  $\text{C}_{14}\text{H}_{25}\text{NO}_6$  303.1682; found 303.1687; IR ( $\text{cm}^{-1}$ , neat) 3399, 1646.

**(3aR,5R,7R,7aS)-N-butyl-5,7-dihydroxy-2,2-dimethylhexahydro-1,3-benzodioxole-5-carboxamide (3d)**

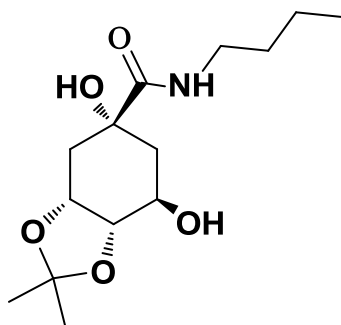

$^1\text{H}$  NMR (300 MHz,  $\text{CDCl}_3$ )  $\delta$  7.00 (s, 1H), 4.95 (d,  $J = 3.7$  Hz, 1H), 4.58 – 4.49 (m, 1H), 4.15 – 4.07 (m, 1H), 3.83 – 3.75 (m, 1H), 3.43 (s, 1H), 3.34 – 3.14 (m, 2H), 2.40 (dd,  $J = 15.6, 2.5$  Hz, 1H), 2.21 (ddd,  $J = 15.0, 5.3, 1.4$  Hz, 1H), 1.99 (ddd,  $J = 14.8, 8.6, 3.1$  Hz, 2H), 1.56 – 1.40 (m, 2H), 1.47 (s, 3H), 1.39 – 1.23 (m, 2H), 1.31 (s, 3H), 0.89 (t,  $J = 7.3$  Hz, 3H);  $^{13}\text{C}$  NMR (75 MHz,  $\text{CDCl}_3$ )  $\delta$  176.6, 108.7, 76.1, 72.8, 72.1, 65.9, 39.2, 37.1, 34.5, 31.5, 27.1, 24.4, 20.0, 13.8; MS (EI) 287.2; HRMS (EI) calcd. for  $\text{C}_{14}\text{H}_{25}\text{NO}_5$  287.1733; found 287.1725; IR ( $\text{cm}^{-1}$ , neat) 3739, 3370, 1646.

**(3aR,5R,7R,7aS)-5,7-dihydroxy-2,2-dimethyl-N-(2-methylpropyl)hexahydro-1,3-benzodioxole-5-carboxamide (3e)**

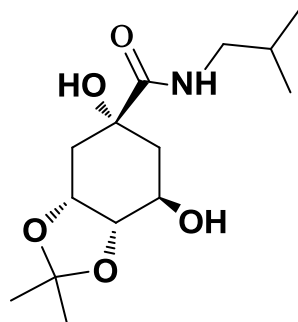

Chemical Formula: C<sub>14</sub>H<sub>25</sub>NO<sub>5</sub>  
Exact Mass: 287.1733

<sup>1</sup>H NMR (300 MHz, CDCl<sub>3</sub>) δ 7.06 (s, 1H), 4.63 – 4.52 (m, 1H), 4.15 (ddd, *J* = 6.9, 2.9, 1.5 Hz, 1H), 3.86 – 3.75 (m, 1H), 3.10 (td, *J* = 6.7, 2.1 Hz, 2H), 2.44 (dd, *J* = 15.6, 2.5 Hz, 1H), 2.25 (ddd, *J* = 15.0, 5.1, 1.5 Hz, 1H), 2.03 (ddd, *J* = 14.9, 7.3, 3.1 Hz, 2H), 1.91 – 1.68 (m, 1H), 1.49 (s, 1H), 1.34 (s, 1H), 0.91 (d, *J* = 6.7 Hz, 6H); <sup>13</sup>C NMR (75 MHz, CDCl<sub>3</sub>) δ 176.7, 108.7, 76.0, 72.9, 72.1, 65.8, 46.7, 37.1, 34.5, 28.6, 27.1, 24.4, 20.1; MS (EI) 287.2; HRMS (EI) calcd. for C<sub>14</sub>H<sub>25</sub>NO<sub>5</sub> 287.1733; found 287.1726; IR (cm<sup>-1</sup>, neat) 3737, 3399, 1646.

**(3aR,5R,7R,7aS)-N-[2-(cyclohex-1-en-1-yl)ethyl]-5,7-dihydroxy-2,2-dimethylhexahydro-1,3-benzodioxole-5-carboxamide (3f)**

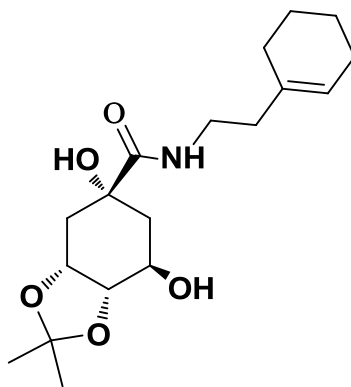

$^1\text{H}$  NMR (300 MHz,  $\text{CDCl}_3$ )  $\delta$  6.97 (s, 1H), 5.45 (s, 1H), 4.96 (s, 1H), 4.62 – 4.52 (m, 1H), 4.14 (d,  $J = 6.9$  Hz, 1H), 3.80 (s, 1H), 3.45 – 3.23 (m, 3H), 2.42 (dd,  $J = 15.6$ , 2.1 Hz, 1H), 2.24 (dd,  $J = 15.0$ , 5.0 Hz, 1H), 2.14 (t,  $J = 6.7$  Hz, 2H), 2.09 – 1.82 (m, 6H), 1.69 – 1.50 (m, 4H), 1.49 (s, 3H), 1.33 (s, 3H);  $^{13}\text{C}$  NMR (75 MHz,  $\text{CDCl}_3$ )  $\delta$  176.5, 134.3, 124.0, 108.7, 76.0, 72.8, 72.1, 65.8, 37.6, 37.1, 37.0, 34.5, 27.9, 27.1, 25.3, 24.4, 22.9, 22.4; MS (EI) 339.2; HRMS (EI) calcd. for  $\text{C}_{18}\text{H}_{29}\text{NO}_5$  339.2046; found 339.2055; IR ( $\text{cm}^{-1}$ , neat) 3739, 3396, 1646.

**(3aR,5R,7R,7aS)-N-(3,3-diphenylpropyl)-5,7-dihydroxy-2,2-dimethylhexahydro-1,3-benzodioxole-5-carboxamide (3g)**

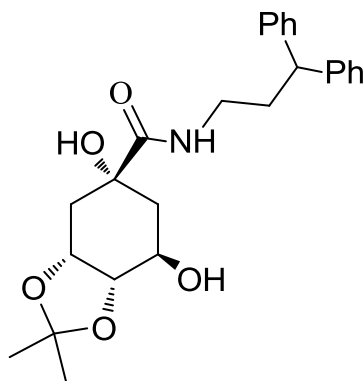

$^1\text{H}$  NMR (300 MHz,  $\text{CDCl}_3$ )  $\delta$  7.40 – 7.15 (m, 10H), 7.09 (t,  $J = 5.9$  Hz, 1H), 4.59 – 4.51 (m, 1H), 4.15 (dd,  $J = 6.8, 2.2$  Hz, 1H), 4.02 – 3.90 (m, 1H), 3.86 (dt,  $J = 5.9, 3.1$  Hz, 1H), 3.24 (dd,  $J = 14.2, 6.3$  Hz, 2H), 2.48 – 2.16 (m, 4H), 2.10 – 1.96 (m, 2H), 1.52 (s, 3H), 1.35 (s, 3H);  $^{13}\text{C}$  NMR (75 MHz,  $\text{CDCl}_3$ )  $\delta$  176.5, 143.9, 128.6, 127.7, 126.4, 108.6, 76.2, 72.9, 72.1, 65.9, 48.9, 38.2, 37.0, 35.0, 34.3, 27.1, 24.4; MS (EI) 425.0; HRMS (EI) calcd. for  $\text{C}_{25}\text{H}_{31}\text{NO}_5$  425.2202; found 425.2202; IR ( $\text{cm}^{-1}$ , neat) 3401, 1648.

**(3a*R*,5*R*,7*R*,7a*S*)-*N*-cyclopentyl-5,7-dihydroxy-2,2-dimethylhexahydro-1,3-benzodioxole-5-carboxamide (3h)**

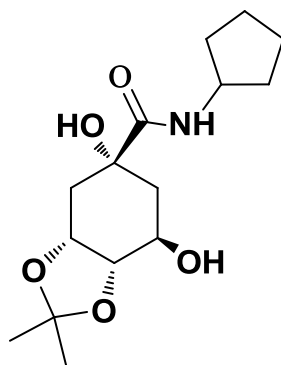

$^1\text{H}$  NMR (300 MHz,  $\text{CDCl}_3$ )  $\delta$  6.92 (d,  $J = 6.5$  Hz, 1H), 4.64 – 4.52 (m, 1H), 4.28 – 4.01 (m, 2H), 3.84 – 3.76 (m, 1H), 2.44 (dd,  $J = 15.6, 2.5$  Hz, 1H), 2.26 (ddd,  $J = 15.0,$

5.0, 1.6 Hz, 1H), 2.07 – 1.94 (m, 4H), 1.75 – 1.52 (m, 4H), 1.50 (s, 3H), 1.47 – 1.39 (m, 2H), 1.34 (s, 3H);  $^{13}\text{C}$  NMR (75 MHz,  $\text{CDCl}_3$ )  $\delta$  176.2, 108.7, 75.9, 72.6, 72.1, 65.8, 51.1, 37.0, 34.4, 33.2, 33.1, 27.1, 24.4, 23.9; MS (EI) 299.2; HRMS (EI) calcd. for  $\text{C}_{15}\text{H}_{25}\text{NO}_5$  299.1733; found 299.1735; IR ( $\text{cm}^{-1}$ , neat) 3743, 3401, 1648.

**(3a*R*,5*R*,7*R*,7a*S*)-5,7-dihydroxy-2,2-dimethyl-*N*-[3-(morpholin-4-yl)propyl]hexahydro-1,3-benzodioxole-5-carboxamide (3i)**

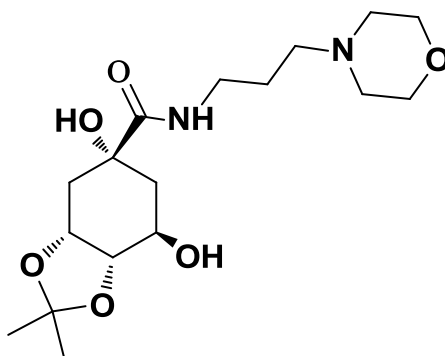

$^1\text{H}$  NMR (300 MHz,  $\text{CDCl}_3$ )  $\delta$  8.10 (s, 1H), 4.62 – 4.45 (m, 1H), 4.11 (dd,  $J = 6.6, 1.7$  Hz, 1H), 3.79 – 3.75 (m, 1H), 3.75 – 3.62 (m, 4H), 3.36 – 3.30 (m, 2H), 2.53 – 2.30 (m, 7H), 2.20 (dd,  $J = 14.9, 5.3$  Hz, 1H), 1.97 (ddd,  $J = 14.8, 8.4, 3.0$  Hz, 2H), 1.77-1.59 (m, 2H), 1.48 (s, 3H), 1.31 (s, 3H);  $^{13}\text{C}$  NMR (75 MHz,  $\text{CDCl}_3$ )  $\delta$  176.5, 108.6, 76.0, 72.8, 72.1, 66.8, 65.8, 57.8, 53.8, 39.3, 37.2, 34.6, 27.1, 24.9, 24.4; MS

(ESI) 359; (M+H)<sup>+</sup> HRMS (ESI) calcd. for C<sub>17</sub>H<sub>30</sub>N<sub>2</sub>O<sub>6</sub> 358.2104; found 359.2184

(M+H); IR (cm<sup>-1</sup>, neat) 3741, 3318, 1637.

**(3aR,5R,7R,7aS)-5,7-dihydroxy-2,2-dimethyl-N-pentylhexahydro-1,3-benzodioxol**

**e-5-carboxamide (3j)**

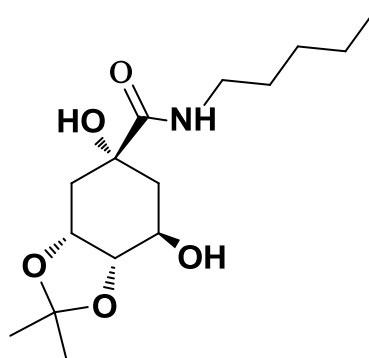

<sup>1</sup>H NMR (300 MHz, CDCl<sub>3</sub>) δ 7.00 (s, 1H), 4.62 – 4.48 (m, 1H), 4.24 – 4.01 (m, 1H),

3.81 – 3.77 (m, 1H), 3.37 – 3.13 (m, 2H), 2.41 (dd, *J* = 15.6, 2.5 Hz, 1H), 2.32 – 2.12

(m, 1H), 2.00 (ddd, *J* = 14.9, 8.4, 3.1 Hz, 2H), 1.60 – 1.40 (m, 2H), 1.48 (s, 3H), 1.33

(s, 3H), 1.40 – 1.22 (m, 4H), 0.87 (t, *J* = 6.8 Hz, 3H); <sup>13</sup>C NMR (75 MHz, CDCl<sub>3</sub>) δ

176.6, 108.7, 76.1, 72.8, 72.1, 65.9, 39.4, 37.1, 34.5, 29.2, 29.0, 27.1, 24.4, 22.4, 14.0;

MS (EI) 301.2; HRMS (EI) calcd. for C<sub>15</sub>H<sub>27</sub>NO<sub>5</sub> 301.1889; found 301.1897; IR (cm<sup>-1</sup>,

neat) 3739, 3399, 1646.

**(3aR,5R,7R,7aS)-5,7-dihydroxy-N-(2-methylpropyl)hexahydrospiro[1,3-benzodio**



**xole-2,1'-cyclohexane]-5-carboxamide (3k)**

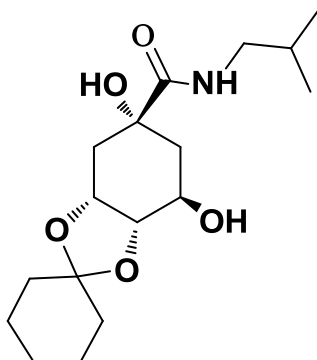

$^1\text{H}$  NMR (300 MHz,  $\text{CDCl}_3$ )  $\delta$  7.06 (s, 1H), 4.82 (s, 1H), 4.61 – 4.43 (m, 1H), 4.18 – 4.07 (m, 1H), 3.86 – 3.72 (m, 1H), 3.53 (s, 1H), 3.06 (t,  $J = 6.5$  Hz, 2H), 2.38 (dd,  $J = 15.6, 2.5$  Hz, 1H), 2.18 (ddd,  $J = 14.7, 5.6, 1.0$  Hz, 1H), 2.01 (ddd,  $J = 12.1, 11.0, 3.1$  Hz, 2H), 1.84 – 1.70 (m, 1H), 1.70 – 1.26 (m, 10H), 0.88 (d,  $J = 6.7$  Hz, 6H);  $^{13}\text{C}$  NMR (75 MHz,  $\text{CDCl}_3$ )  $\delta$  176.5, 109.4, 75.9, 73.1, 71.8, 66.2, 46.6, 37.2, 37.0, 34.5, 33.6, 28.5, 25.1, 24.0, 23.5, 20.0; MS (ESI) 328 (M+H); HRMS (ESI) calcd. for  $\text{C}_{17}\text{H}_{29}\text{NO}_5$  327.2046; found 328.2126 (M+H); IR ( $\text{cm}^{-1}$ , neat) 3741, 3401, 1648.

**(3aR,5R,7R,7aS)-5,7-dihydroxy-N-[2-(pyridin-2-yl)ethyl]hexahydrospiro[1,3-benzodioxole-2,1'-cyclohexane]-5-carboxamide (3l)**

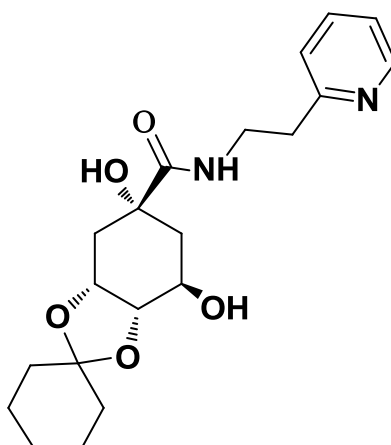

$^1\text{H}$  NMR (300 MHz,  $\text{CDCl}_3$ )  $\delta$  8.52 (d,  $J = 4.7$  Hz, 1H), 7.66 (t,  $J = 5.4$  Hz, 1H), 7.60 (td,  $J = 7.7, 1.8$  Hz, 1H), 7.16 – 7.11 (m, 2H), 4.87 (s, 1H), 4.56 – 4.43 (m, 1H), 4.15 – 4.06 (m, 1H), 3.81 (s, 1H), 3.73 – 3.60 (m, 2H), 3.49 (s, 1H), 3.00 (t,  $J = 6.5$  Hz, 2H), 2.36 (dd,  $J = 15.6, 2.5$  Hz, 1H), 2.17 (ddd,  $J = 14.8, 5.6, 1.2$  Hz, 1H), 2.09 – 1.92 (m, 2H), 1.73 – 1.29 (m, 10H);  $^{13}\text{C}$  NMR (75 MHz,  $\text{CDCl}_3$ )  $\delta$  176.6, 159.1, 149.4, 136.7, 123.5, 121.8, 109.4, 75.9, 73.0, 71.8, 66.2, 38.7, 37.2, 37.1, 37.0, 34.4, 33.7, 25.1, 24.1, 23.6; MS (EI) 376.0; HRMS (EI) calcd. for  $\text{C}_{20}\text{H}_{28}\text{N}_2\text{O}_5$  376.1998; found 376.2001; IR ( $\text{cm}^{-1}$ , neat) 3737, 3338, 1648.

**(3aR,5R,7R,7aS)-N-cyclopentyl-5,7-dihydroxyhexahydrospiro[1,3-benzodioxole-2,1'-cyclohexane]-5-carboxamide (3m)**

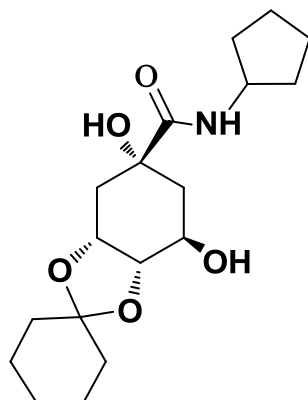

$^1\text{H}$  NMR (300 MHz,  $\text{CDCl}_3$ )  $\delta$  6.90 (d,  $J = 7.6$  Hz, 1H), 4.83 (s, 1H), 4.60 – 4.47 (m, 1H), 4.20 – 4.02 (m, 2H), 3.81 – 3.78 (m, 1H), 3.48 (s, 1H), 2.39 (dd,  $J = 15.6, 2.5$  Hz, 1H), 2.19 (ddd,  $J = 14.9, 5.4, 1.2$  Hz, 1H), 2.07 – 1.84 (m, 4H), 1.76 – 1.28 (m, 16H);

$^{13}\text{C}$  NMR (75 MHz,  $\text{CDCl}_3$ )  $\delta$  176.0, 109.4, 75.8, 72.8, 71.8, 66.1, 51.0, 37.1, 37.0, 34.4, 33.6, 33.1, 33.1, 25.1, 24.1, 23.8, 23.5; MS (EI) 339.0; HRMS (EI) calcd. for  $\text{C}_{18}\text{H}_{29}\text{NO}_5$  339.2046; found 339.2044; IR ( $\text{cm}^{-1}$ , neat) 3743, 3401, 1644.

**(3aR,5R,7R,7aS)-5,7-dihydroxy-N-(3-phenylpropyl)hexahydrospiro[1,3-benzodioxole-2,1'-cyclohexane]-5-carboxamide (3n)**

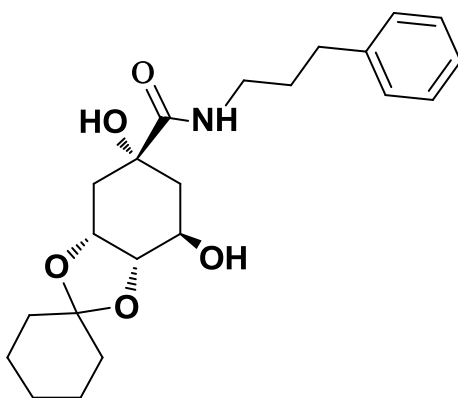

$^1\text{H}$  NMR (300 MHz,  $\text{CDCl}_3$ )  $\delta$  7.30 – 7.15 (m, 5H), 7.06 (t,  $J = 5.4$  Hz, 1H), 4.80 (s, 1H), 4.62 – 4.45 (m, 1H), 4.23 – 4.06 (m, 1H), 3.86 – 3.82 (m, 1H), 3.51 (s, 1H), 3.29 (dd,  $J = 13.5, 6.8$  Hz, 2H), 2.64 (t,  $J = 7.7$  Hz, 2H), 2.41 (dd,  $J = 15.6, 2.4$  Hz, 1H), 2.21 (dd,  $J = 14.8, 5.1$  Hz, 1H), 2.03 (ddd,  $J = 14.6, 8.2, 3.0$  Hz, 2H), 1.94 – 1.79 (m, 2H), 1.79 – 1.32 (m, 10H);  $^{13}\text{C}$  NMR (75 MHz,  $\text{CDCl}_3$ )  $\delta$  176.5, 141.2, 128.5, 128.4, 126.1, 109.4, 75.9, 73.0, 71.8, 66.2, 38.9, 37.2, 37.0, 34.4, 33.6, 33.1, 31.1, 25.1, 24.0, 23.5; MS (EI) 389.0; HRMS (EI) calcd. for  $\text{C}_{22}\text{H}_{31}\text{NO}_5$  389.2202; found 389.2201; IR ( $\text{cm}^{-1}$ , neat) 3743, 3401, 1646.

**(3aR,5R,7R,7aS)-N-[2-(cyclohex-1-en-1-yl)ethyl]-5,7-dihydroxyhexahydrospiro[1,3-benzodioxole-2,1'-cyclohexane]-5-carboxamide (3o)**

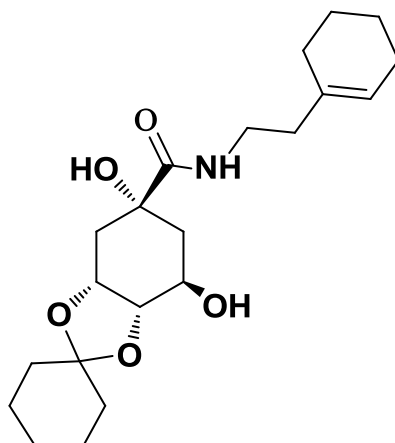

$^1\text{H}$  NMR (300 MHz,  $\text{CDCl}_3$ )  $\delta$  6.96 (t,  $J = 5.3$  Hz, 1H), 5.42 (s, 1H), 4.86 (s, 1H), 4.61 – 4.38 (m, 1H), 4.21 – 4.02 (m, 1H), 3.88 – 3.74 (m, 1H), 3.41 (d,  $J = 14.3$  Hz, 1H), 3.38 – 3.24 (m, 2H), 2.37 (dd,  $J = 15.6, 2.5$  Hz, 1H), 2.23 – 2.06 (m, 3H), 2.06 – 1.83 (m, 6H), 1.72 – 1.28 (m, 14H);  $^{13}\text{C}$  NMR (75 MHz,  $\text{CDCl}_3$ )  $\delta$  176.4, 134.2, 123.9, 109.4, 75.8, 72.9, 71.7, 66.1, 37.6, 37.1, 37.0, 36.9, 34.5, 33.6, 27.9, 25.3, 25.1, 24.0, 23.5, 22.9, 22.4; MS (EI) 379.0; HRMS (EI) calcd. for  $\text{C}_{21}\text{H}_{33}\text{NO}_5$  379.2359; found 379.2361; IR ( $\text{cm}^{-1}$ , neat) 3739, 3394, 1646.

**(3aR,5R,7R,7aS)-N-(3,3-diphenylpropyl)-5,7-dihydroxyhexahydrospiro[1,3-benzodioxole-2,1'-cyclohexane]-5-carboxamide (3p)**

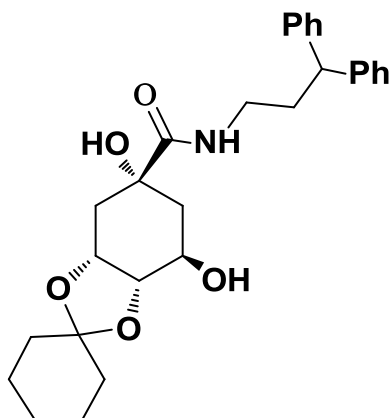

$^1\text{H}$  NMR (300 MHz,  $\text{CDCl}_3$ )  $\delta$  7.29 – 7.02 (m, 10H), 6.95 (t,  $J = 5.7$  Hz, 1H), 4.71 (s, 1H), 4.51 – 4.40 (m, 1H), 4.05 (dd,  $J = 6.3, 2.9$  Hz, 1H), 3.86 (t,  $J = 7.8$  Hz, 1H), 3.80 – 3.71 (m, 1H), 3.40 (s, 1H), 3.14 (dd,  $J = 13.9, 6.5$  Hz, 2H), 2.40 – 2.05 (m, 4H), 2.01 – 1.83 (m, 2H), 1.61 – 1.32 (m, 10H);  $^{13}\text{C}$  NMR (75 MHz,  $\text{CDCl}_3$ )  $\delta$  176.5, 144.0, 128.7, 127.8, 126.5, 109.4, 75.9, 73.0, 71.8, 66.2, 49.0, 38.2, 37.2, 37.0, 35.1, 34.4, 33.6, 25.1, 24.0, 23.5; MS (EI) 465.0; HRMS (EI) calcd. for  $\text{C}_{28}\text{H}_{35}\text{NO}_5$  465.2515; found 465.2313; IR ( $\text{cm}^{-1}$ , neat) 3401, 1644.

**(3aR,5R,7R,7aS)-5,7-dihydroxy-N-(3-methoxypropyl)hexahydrospiro[1,3-benzodioxole-2,1'-cyclohexane]-5-carboxamide (3q)**

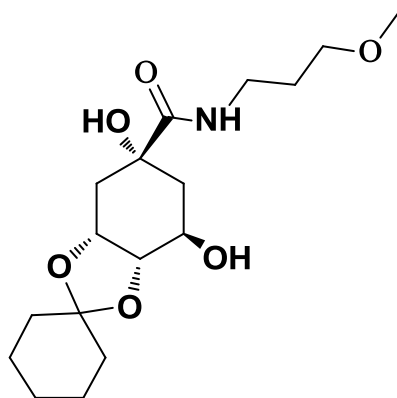

$^1\text{H}$  NMR (300 MHz,  $\text{CDCl}_3$ )  $\delta$  7.40 (s, 1H), 4.85 (s, 1H), 4.59 – 4.49 (m, 1H), 4.12 (dd,  $J = 6.6, 1.9$  Hz, 1H), 3.81 (s, 1H), 3.49 – 3.41 (m, 2H), 3.41 – 3.34 (m, 2H), 3.32 (s, 3H), 2.40 (dd,  $J = 15.6, 2.2$  Hz, 1H), 2.21 (dd,  $J = 14.9, 4.3$  Hz, 1H), 2.10 – 1.95 (m, 2H), 1.84 – 1.72 (m, 2H), 1.71 – 1.32 (m, 10H);  $^{13}\text{C}$  NMR (75 MHz,  $\text{CDCl}_3$ )  $\delta$  176.5, 109.4, 75.8, 72.9, 71.7, 71.3, 66.1, 58.9, 37.8, 37.2, 37.0, 34.5, 33.6, 29.1, 25.1, 24.1, 23.6; MS (EI) 343.2; HRMS (EI) calcd. for  $\text{C}_{17}\text{H}_{29}\text{NO}_6$  343.1995; found 343.1990; IR ( $\text{cm}^{-1}$ , neat) 3365, 1646.

**(3aR,5R,7R,7aS)-5,7-dihydroxy-N-(3-methylbutyl)hexahydrospiro[1,3-benzodioxole-2,1'-cyclopentane]-5-carboxamide (3r)**

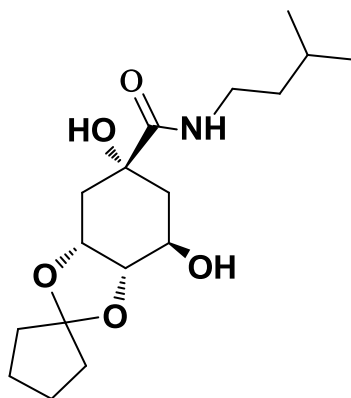

$^1\text{H}$  NMR (300 MHz,  $\text{CDCl}_3$ )  $\delta$  6.95 (s, 1H), 4.84 (s, 1H), 4.41 (s, 1H), 4.07 (s, 1H), 3.80 (s, 1H), 3.39 (s, 1H), 3.27 (d,  $J = 7.1$  Hz, 2H), 2.42 (d,  $J = 15.5$  Hz, 1H), 2.29 – 2.13 (m, 1H), 2.11 – 1.51 (m, 11H), 1.48 – 1.34 (m, 2H), 0.91 (d,  $J = 6.4$  Hz, 6H);  $^{13}\text{C}$  NMR (75 MHz,  $\text{CDCl}_3$ )  $\delta$  176.4, 118.8, 75.9, 73.1, 72.6, 66.0, 38.3, 37.8, 37.2, 36.7, 36.2, 34.4, 26.0, 24.1, 23.2, 22.5; MS (EI) 327.0; HRMS (EI) calcd. for  $\text{C}_{17}\text{H}_{29}\text{NO}_5$  327.2046; found 327.2048; IR ( $\text{cm}^{-1}$ , neat) 3401, 1646.

**(3aR,5R,7R,7aS)-5,7-dihydroxy-N-(3-methoxypropyl)hexahydrospiro[1,3-benzodioxole-2,1'-cyclopentane]-5-carboxamide (3s)**



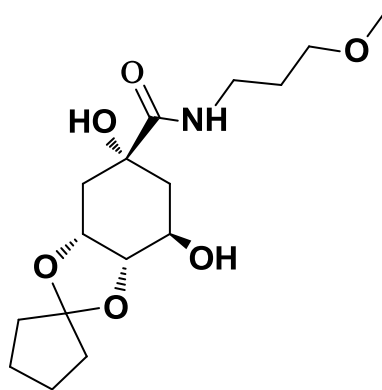

$^1\text{H}$  NMR (300 MHz,  $\text{CDCl}_3$ )  $\delta$  7.41 (s, 1H), 4.86 (d,  $J = 3.1$  Hz, 1H), 4.45 – 4.39 (m, 1H), 4.06 (dd,  $J = 6.6, 3.0$  Hz, 1H), 3.80 (d,  $J = 2.3$  Hz, 1H), 3.45 (t,  $J = 5.8$  Hz, 2H), 3.40 – 3.34 (m, 2H), 3.32 (s, 1H), 2.41 (dd,  $J = 15.6, 2.2$  Hz, 1H), 2.21 (dd,  $J = 14.8, 5.6$  Hz, 1H), 2.09 – 1.91 (m, 3H), 1.90 – 1.59 (m, 9H);  $^{13}\text{C}$  NMR (75 MHz,  $\text{CDCl}_3$ )  $\delta$  176.4, 118.8, 76.0, 73.1, 72.6, 71.3, 66.0, 58.9, 37.8, 37.3, 36.7, 36.2, 34.4, 29.1, 24.0, 23.2; MS (EI) 329.2; HRMS (EI) calcd. for  $\text{C}_{16}\text{H}_{27}\text{NO}_6$  329.1838; found 329.1829; IR ( $\text{cm}^{-1}$ , neat) 3725, 3363, 1648.

**(3aR,5R,7R,7aS)-5,7-dihydroxy-N-(pyridin-2-ylmethyl)hexahydrospiro[1,3-benzodioxole-2,1'-cyclopentane]-5-carboxamide (3t)**

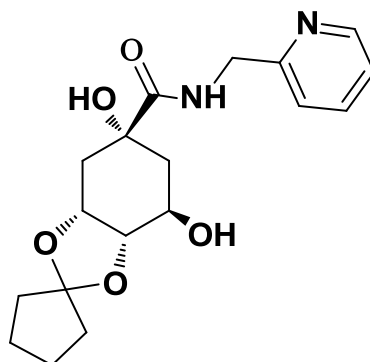

$^1\text{H}$  NMR (300 MHz,  $\text{CDCl}_3$ )  $\delta$  8.53 (d,  $J = 4.6$  Hz, 1H), 8.09 (s, 1H), 7.65 (td,  $J = 7.7$ , 1.7 Hz, 1H), 7.34 – 7.11 (m, 2H), 4.76 (s, 1H), 4.59 – 4.53 (m, 2H), 4.43 – 4.39 (m, 1H), 4.06 (dd,  $J = 6.3$ , 3.9 Hz, 1H), 3.88 – 3.83 (m, 1H), 3.69 (s, 1H), 2.43 (dd,  $J = 15.6$ , 2.7 Hz, 1H), 2.22 (dd,  $J = 14.7$ , 6.4 Hz, 1H), 2.08 (ddd,  $J = 14.7$ , 13.6, 2.7 Hz, 2H), 2.00 – 1.57 (m, 8H);  $^{13}\text{C}$  NMR (75 MHz,  $\text{CDCl}_3$ )  $\delta$  176.5, 156.2, 149.3, 137.0, 122.6, 122.0, 118.8, 76.5, 73.6, 72.9, 66.3, 44.4, 37.6, 36.8, 36.4, 34.4, 24.0, 23.2; MS (EI) 348.2; HRMS (EI) calcd. for  $\text{C}_{18}\text{H}_{24}\text{N}_2\text{O}_5$  348.1685; found 348.1695; IR ( $\text{cm}^{-1}$ , neat) 3390, 1656.



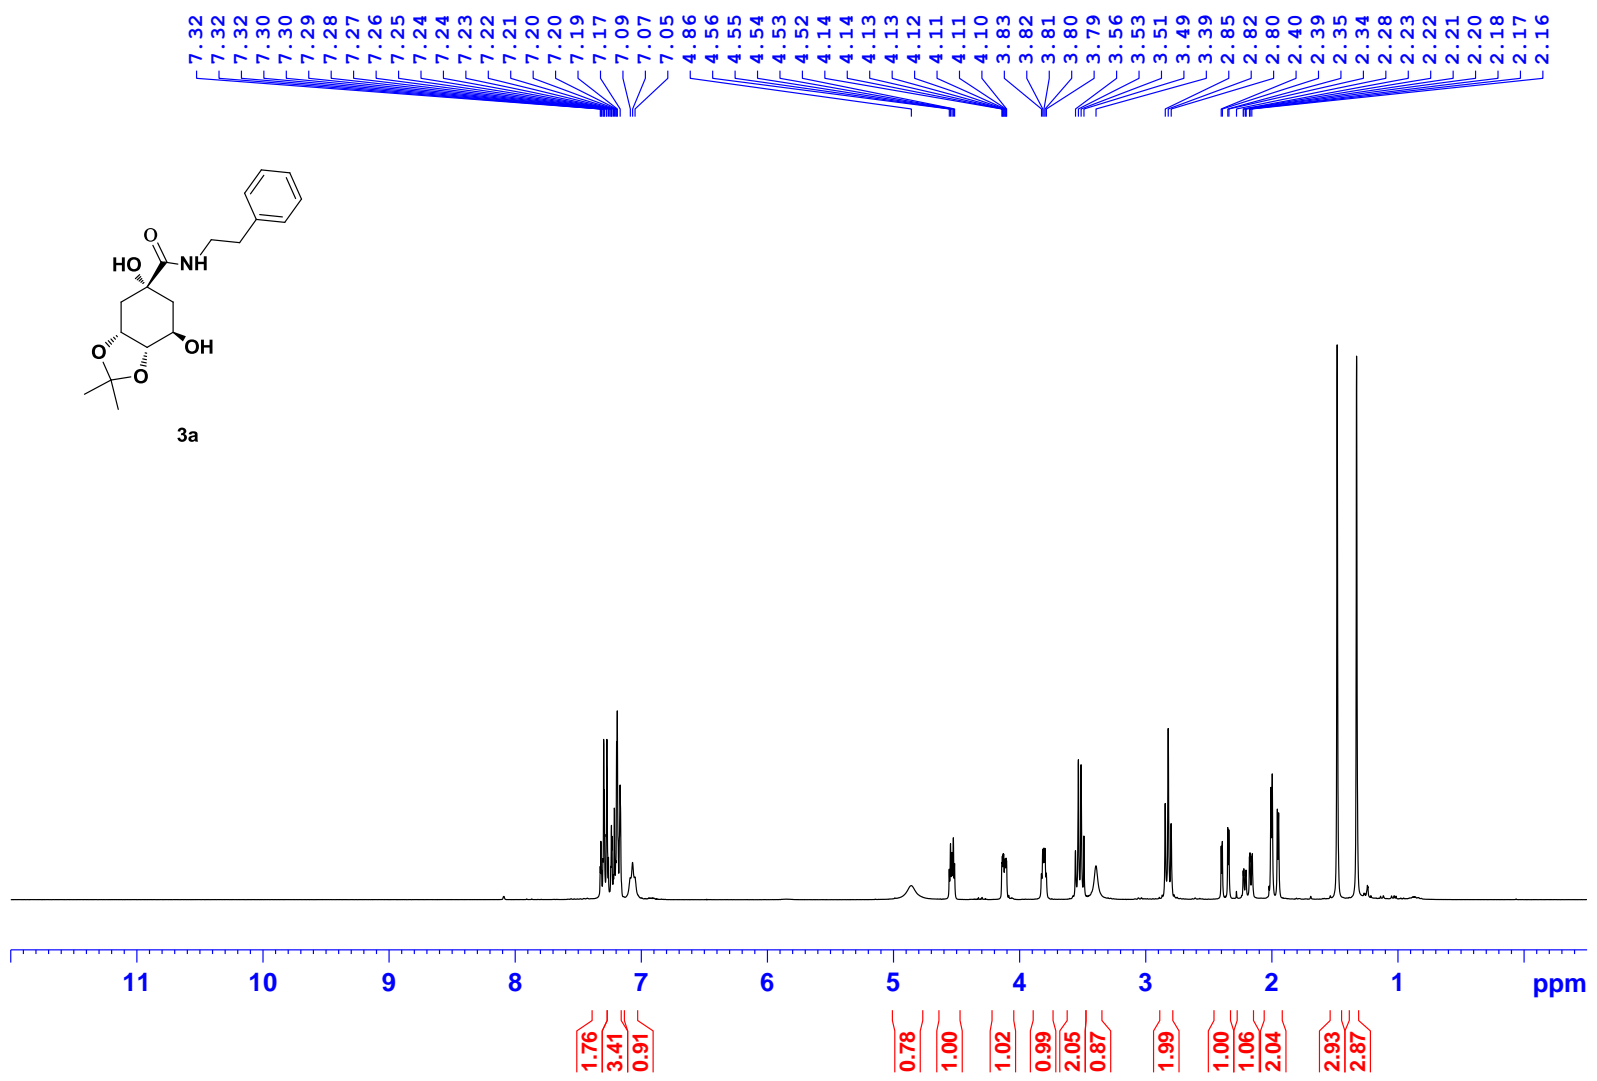

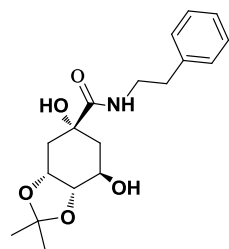

3a

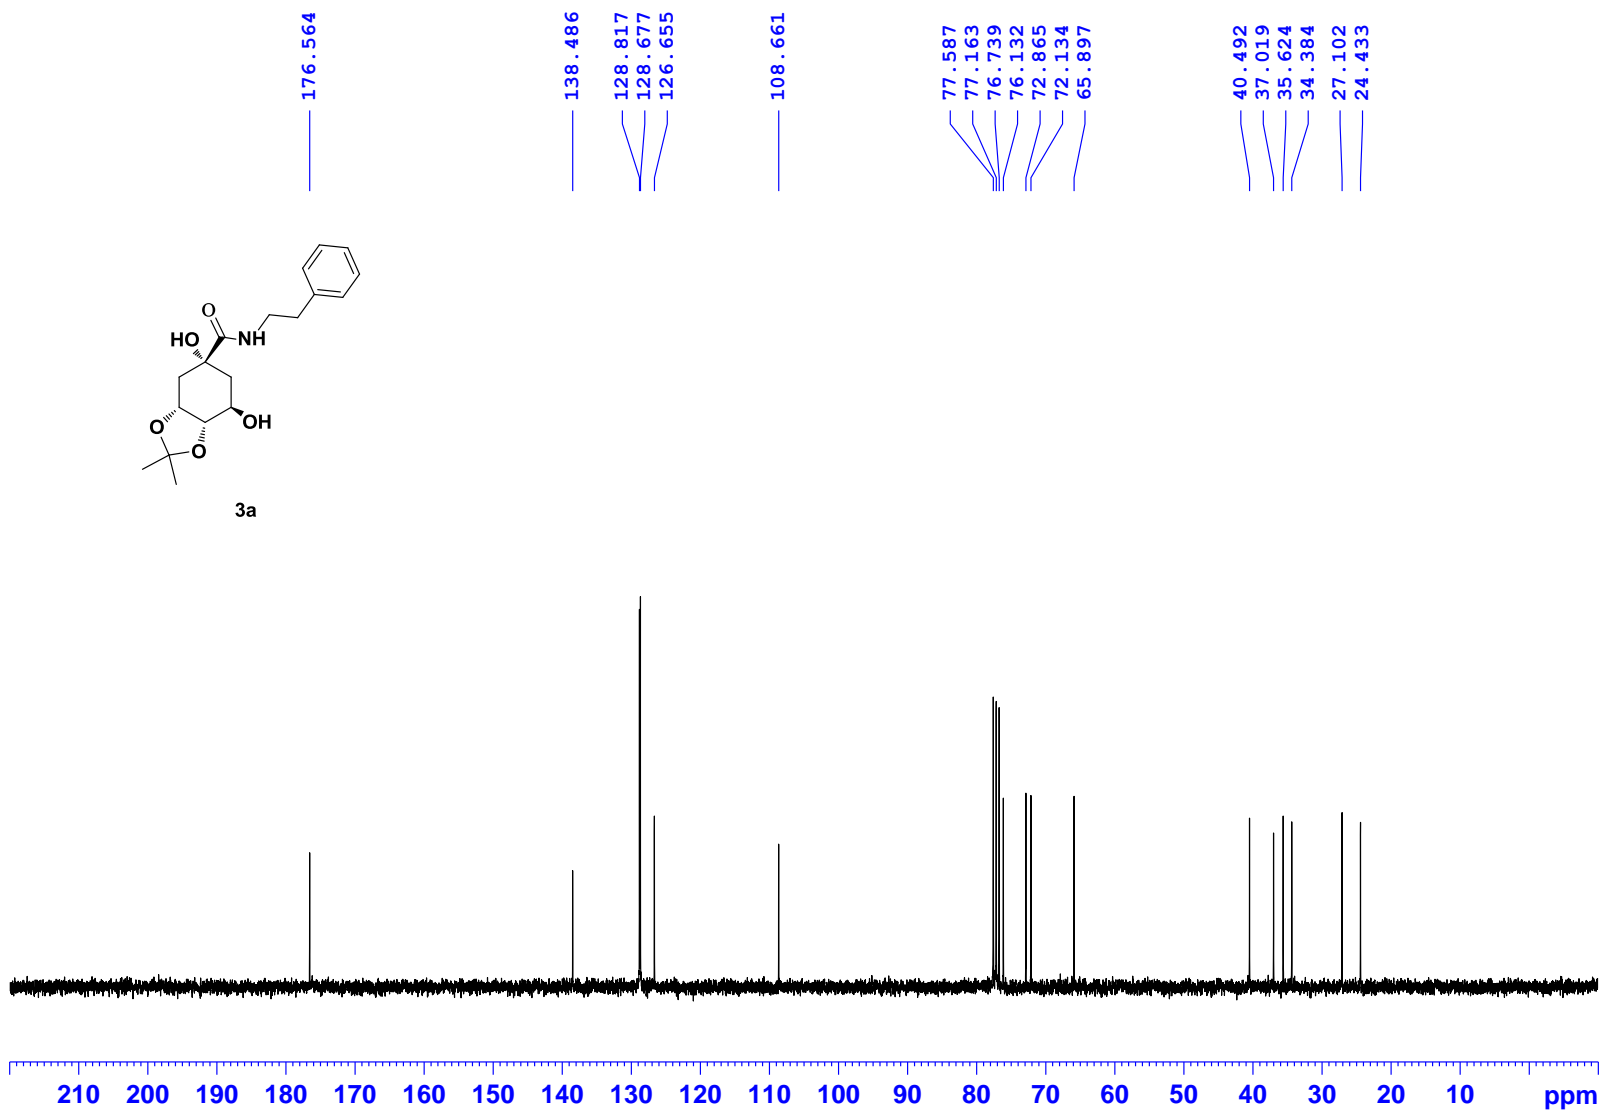

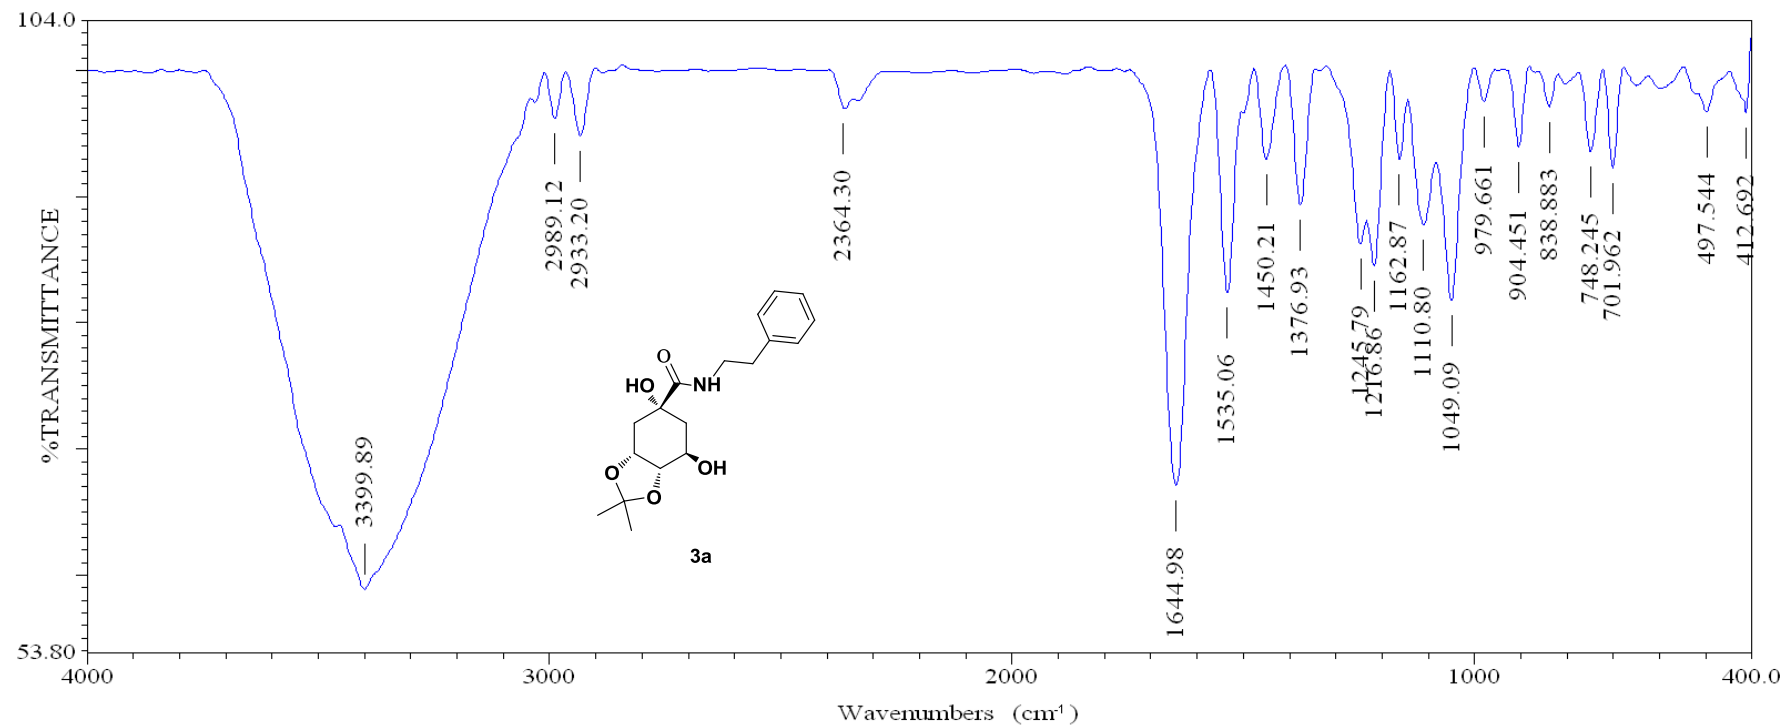

SPEC: lei2823  
Samp: 1315-leeut-D01  
Mode: EI +VE +LMR BSCAN (EXP) UP LR NRM  
Oper:  
Base: 104.1 Inten : 4543178  
Norm: 104.1 RIC : 36581099  
Peak: 1000.00 mmu  
Data: +/-6>10

29-Feb-12 REG : 00:38.3 #9  
Start : 16:02:47 109  
Inlet :  
Masses: 45 > 500  
#peaks: 407

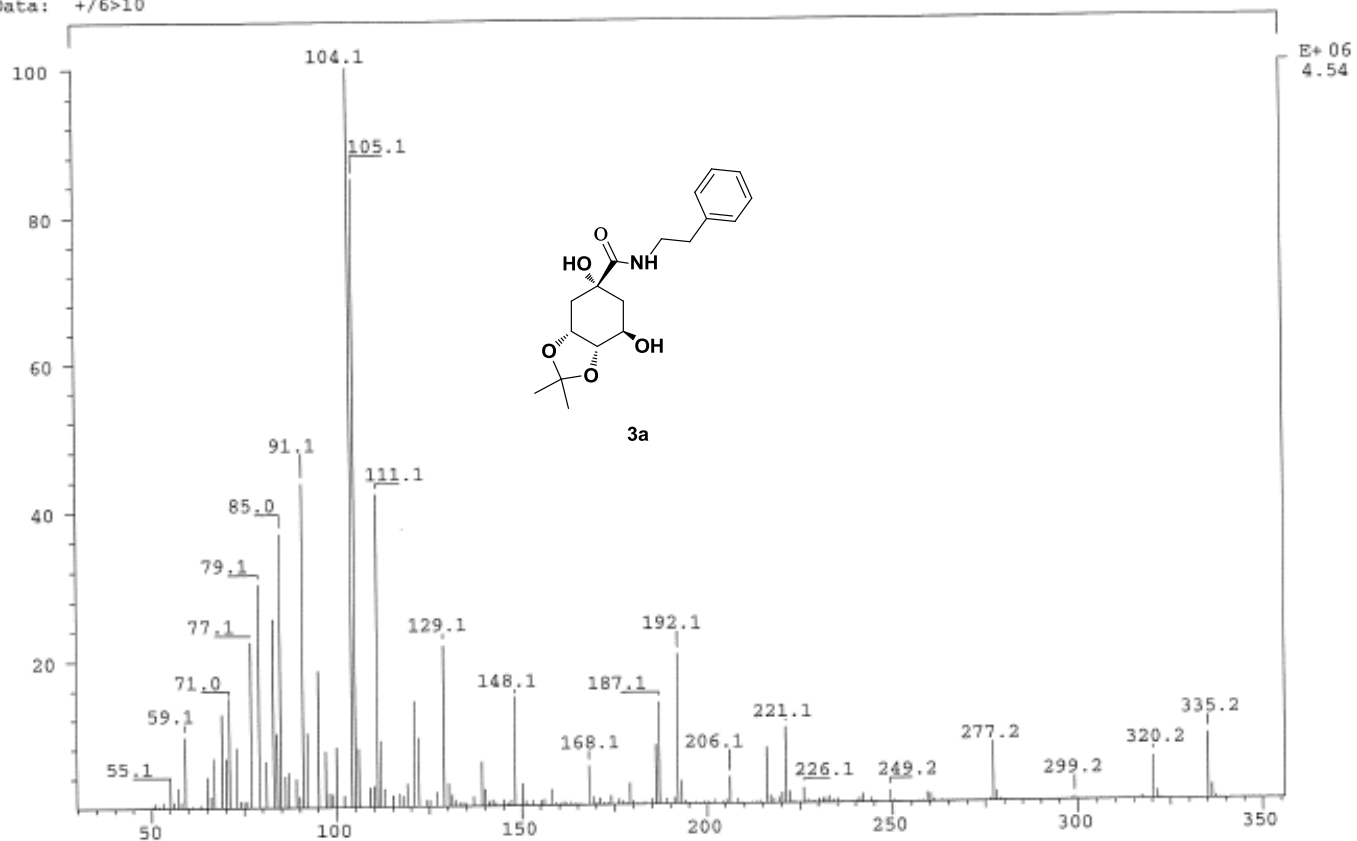

LIST: hei1436-c1 06-Mar-12 REG : 01:49.9 #9  
 Samp: 1315leeutd01 Start : 07:06:19 902  
 Mode: EI +VE +LMR ESCAN (EXP) UP HR NRM Inlet :  
 Oper:  
 Limt: ( 0)  
 : (419) C25.H25.N.O5  
 Peak: 1000.00 mmu R+D: -2.0 > 60.0  
 Data: +/322>460 (CMASS : converted |CMASS : converted |CMASS : conve

| Mass     | Intensity | %RA   | Flags | Delta (mmu) | R+D | Composition  |
|----------|-----------|-------|-------|-------------|-----|--------------|
| 335.1729 | 543952    | 52.24 | #     | 0.4         | 7.3 | C18.H25.N.O5 |

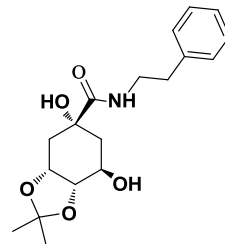

3a



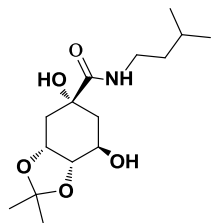

3b

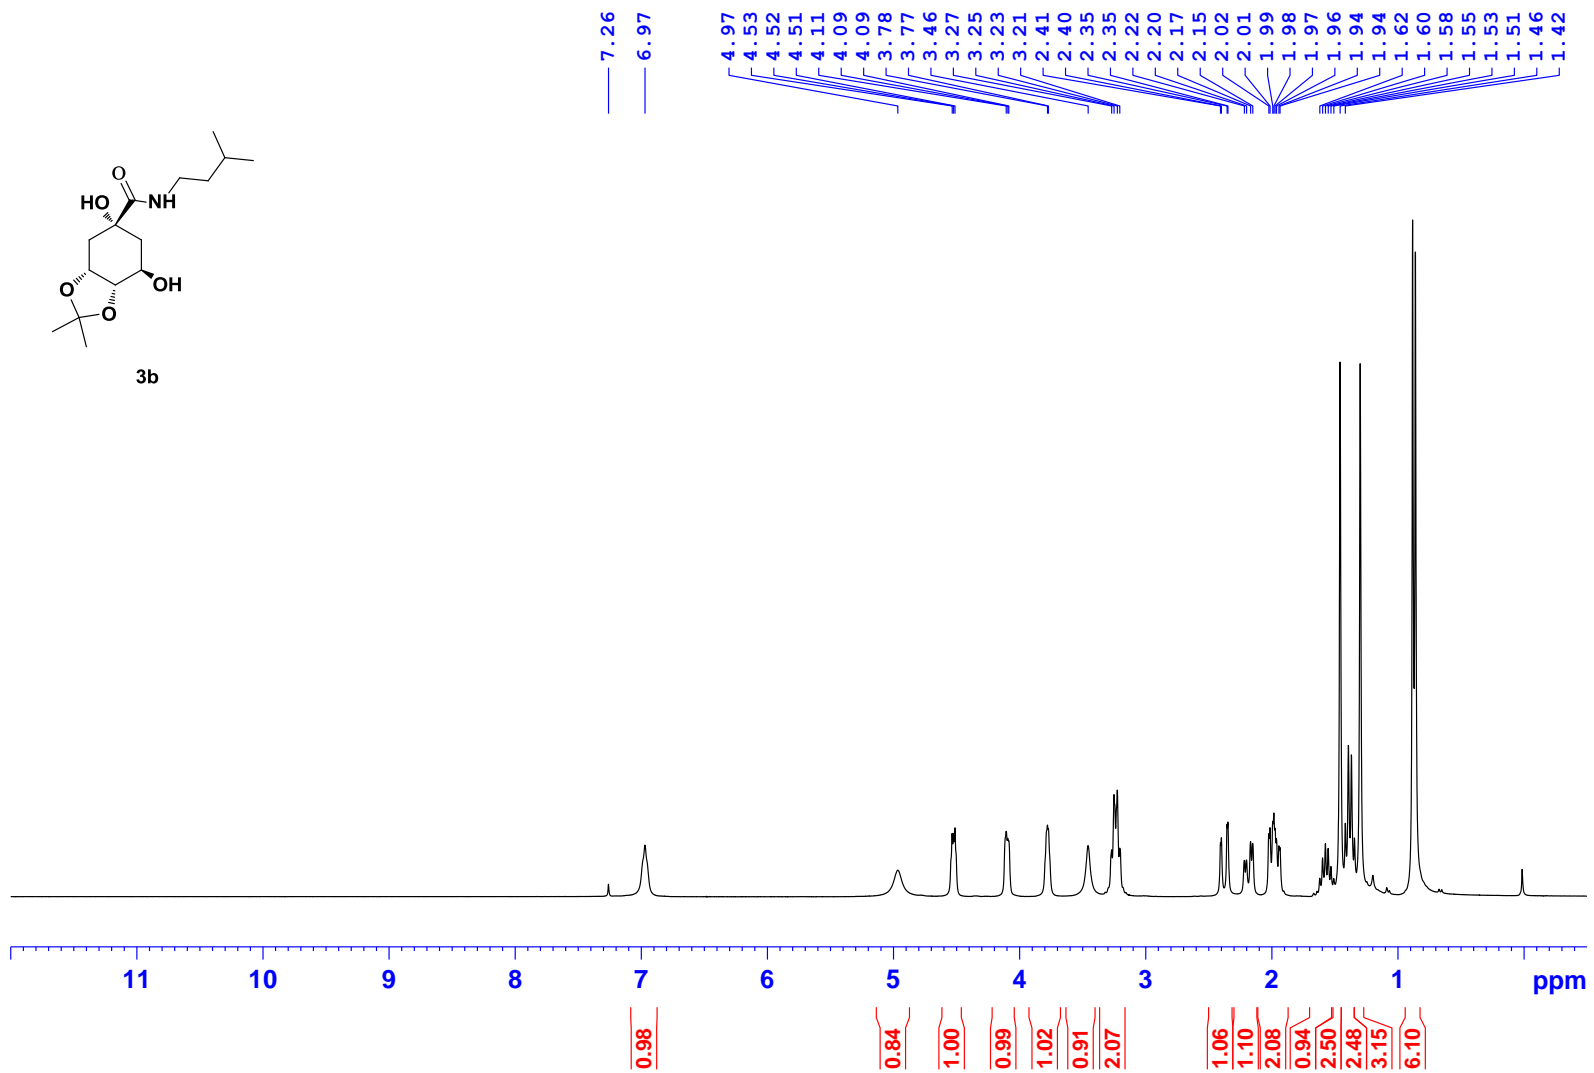

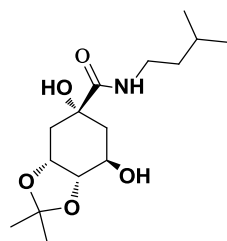

3b

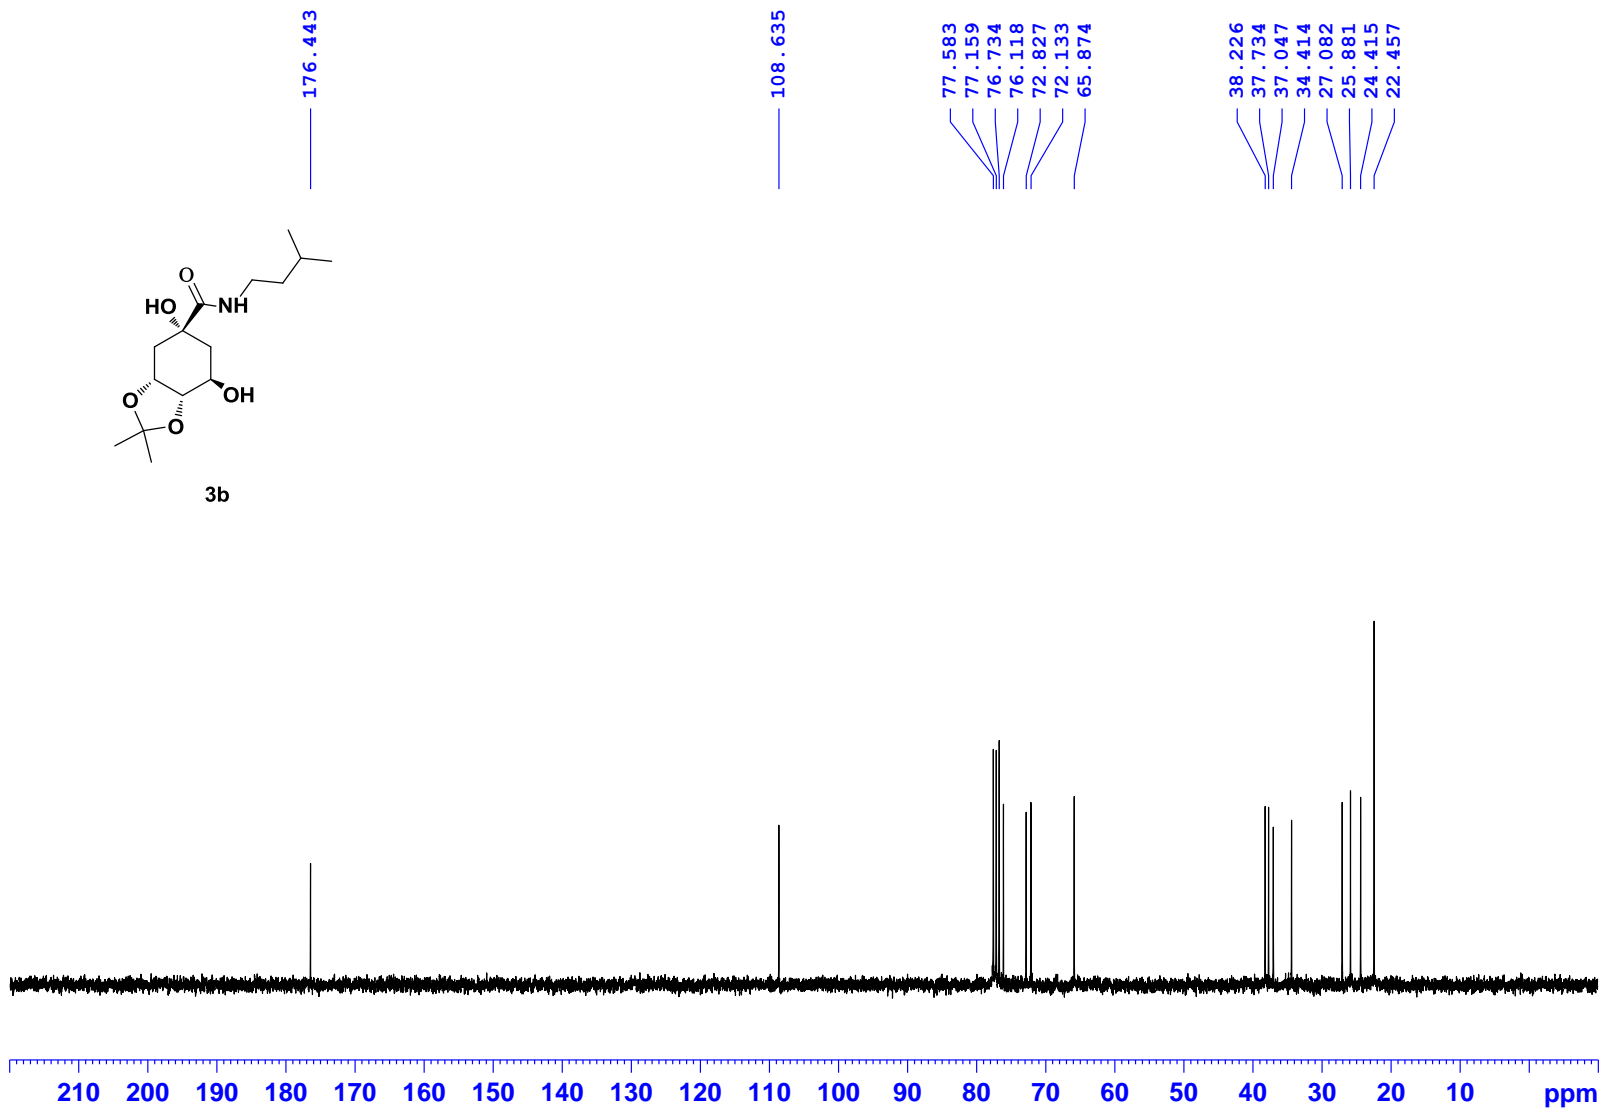

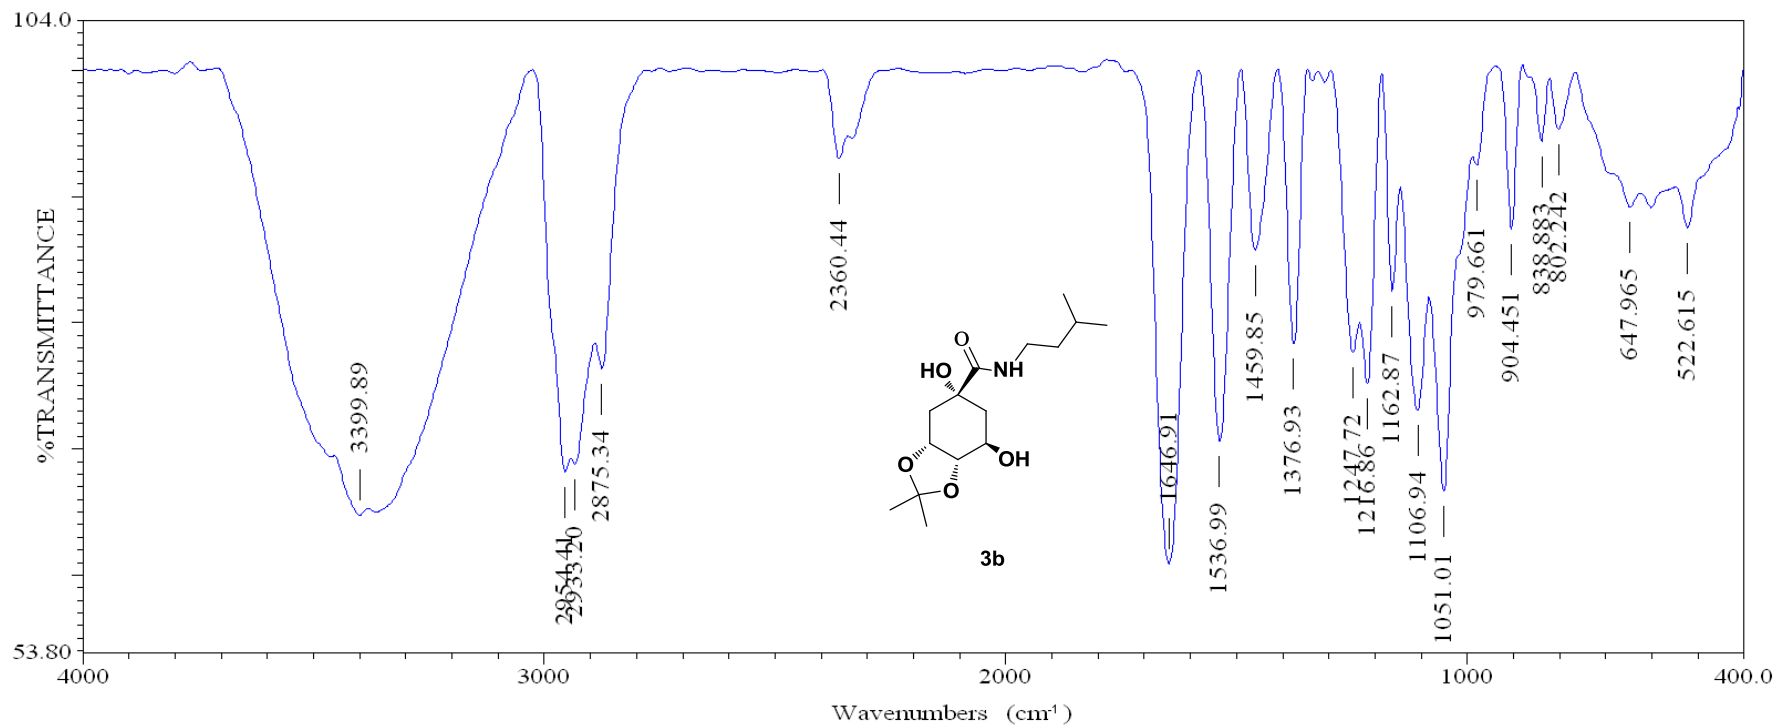

SPEC: 1ei2824  
Samp: 1316-leeut-D02  
Mode: EI +VE +LMR BSCAN (EXP) UP LR NRM  
Oper:  
Base: 187.1 Inten: 32359596  
Norm: 187.1 RIC: 293626709  
Peak: 1000.00 mmu  
Data: +/12>14

29-Feb-12 REG: 01:10.9 #9  
Start: 16:17:15 102  
Inlet:  
Masses: 45 > 500  
#peaks: 471

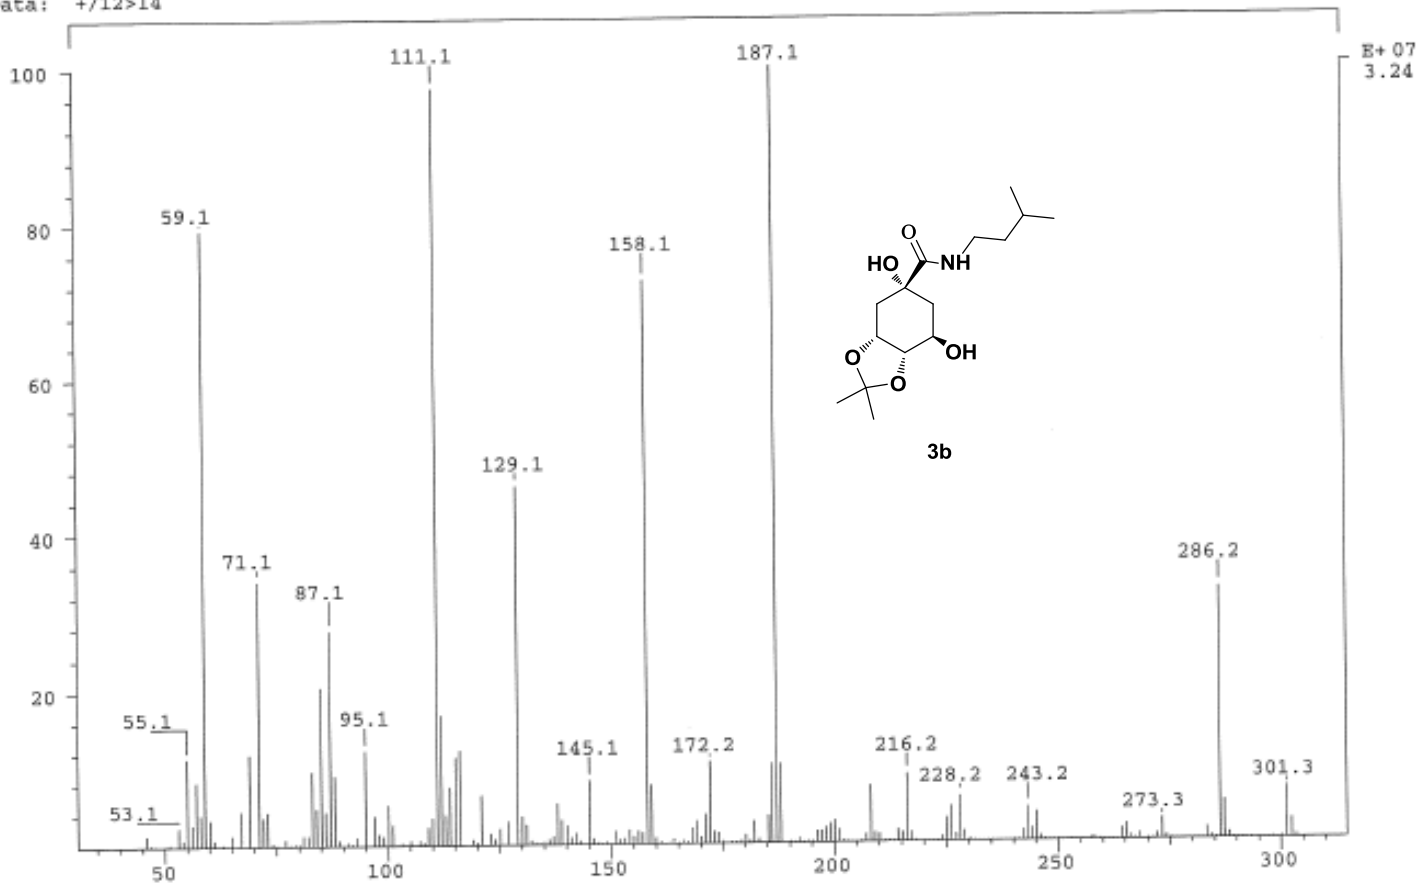

LIST: he11435-c2 05-Mar-12 REG : 01:49.1 #9  
Samp: 13161eeutd02 Start : 23:33:50 839  
Mode: EI +VE +LMR ESCAN (EXP) UP HR NRM Inlet :  
Oper:  
Limt: ( 0)  
: (474) C28.H28.N.06  
Peak: 1000.00 mmu R+D: -2.0 > 60.0  
Data: +/344>441 (CMASS : converted; CMASS : converted | CMASS : conve

| Mass     | Intensity | %RA    | Flags | Delta (mmu) | R+D | Composition  |
|----------|-----------|--------|-------|-------------|-----|--------------|
| 301.1887 | 646232    | 100.00 | #     | 0.3         | 3.0 | C15.H27.N.O5 |

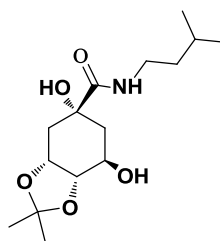

3b

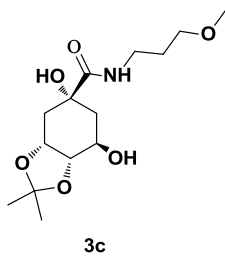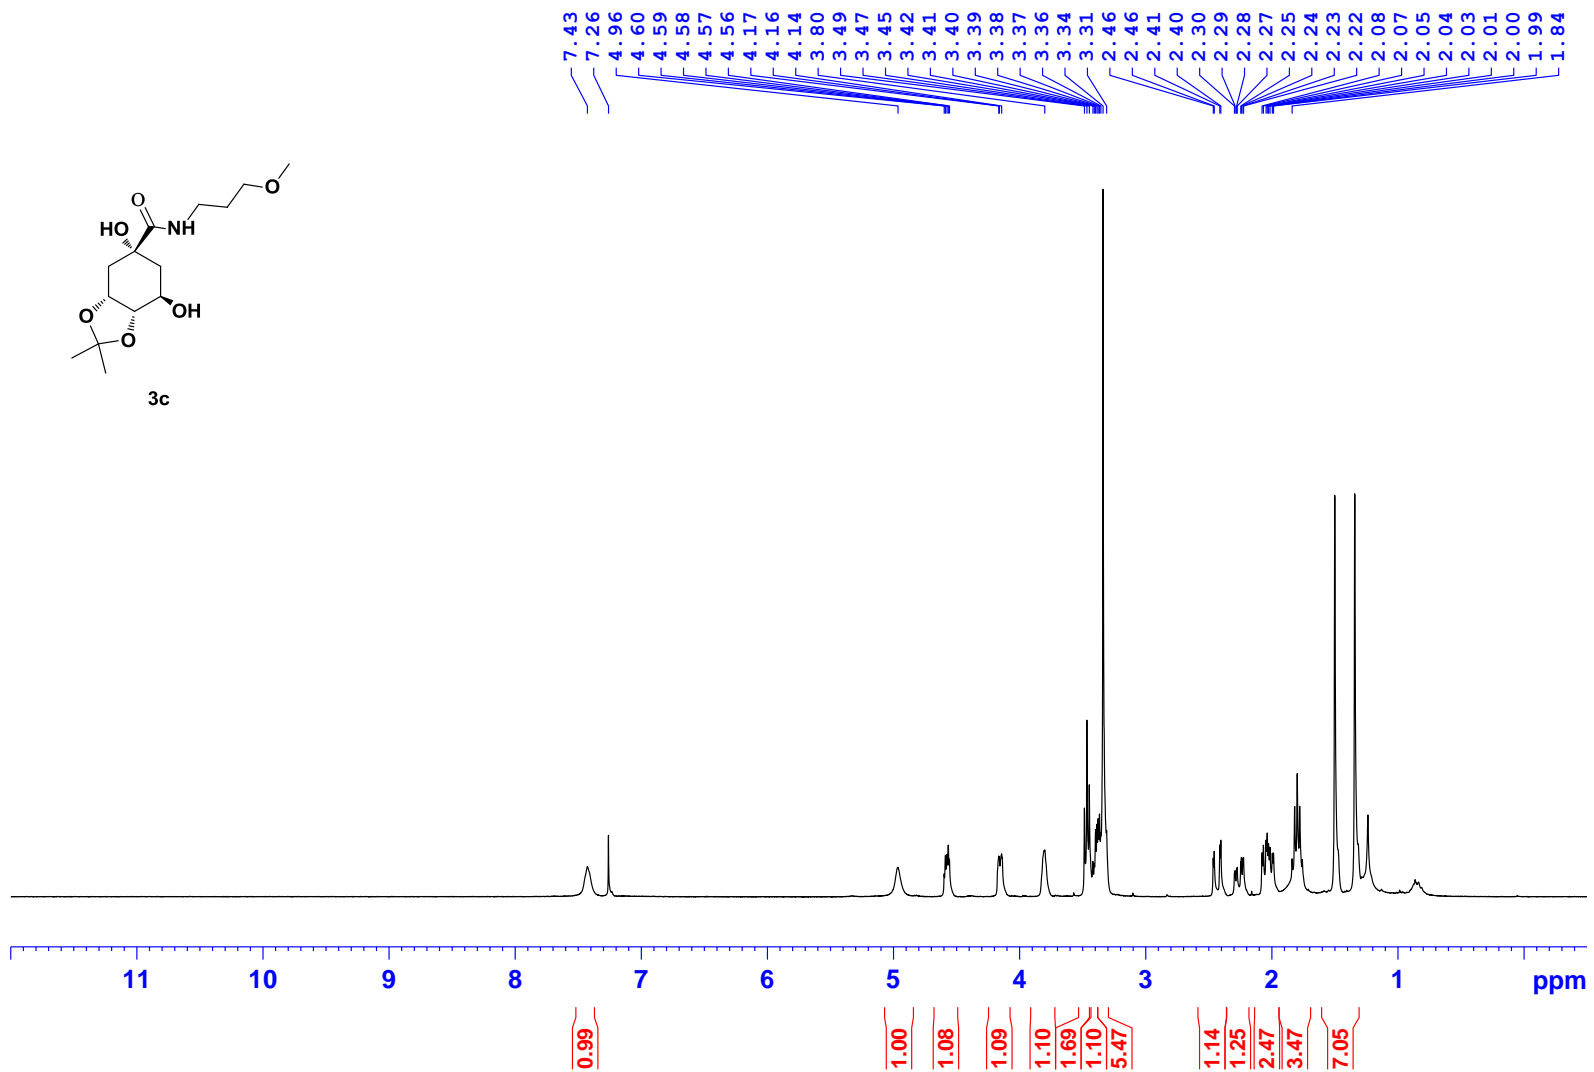

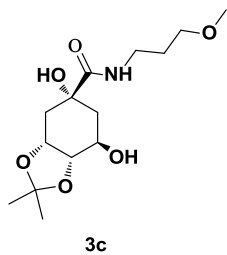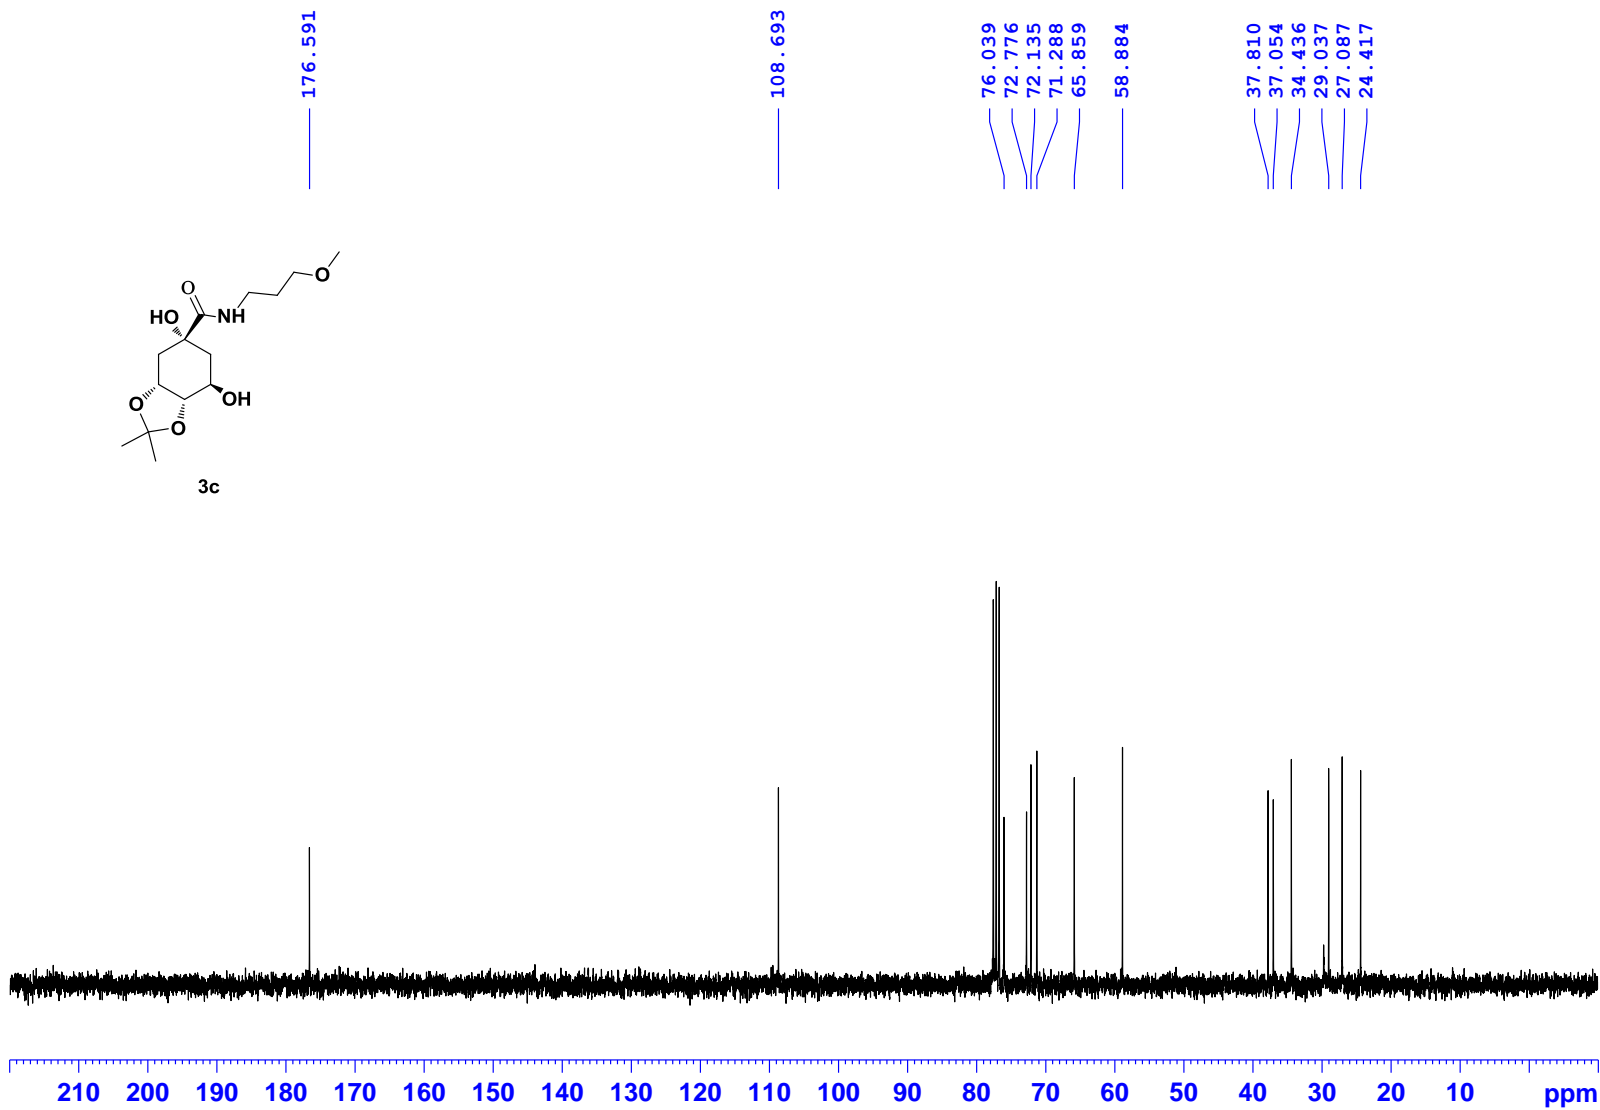

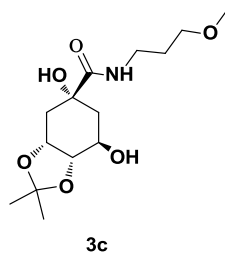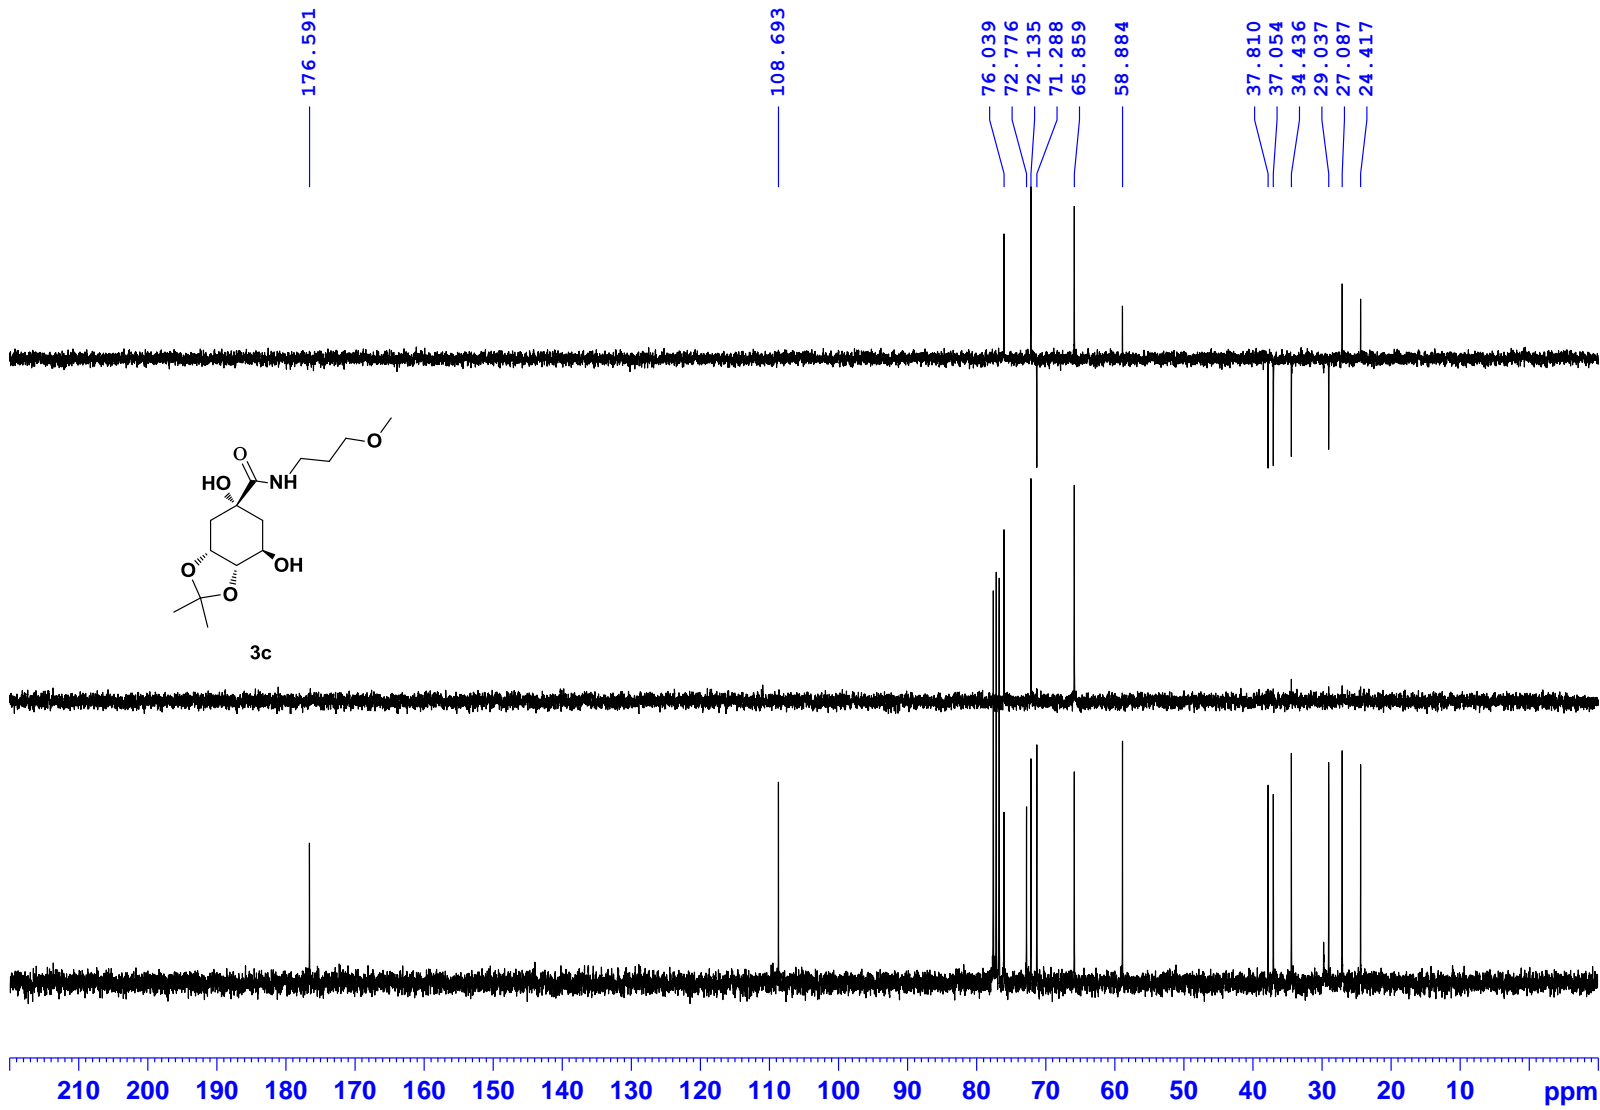



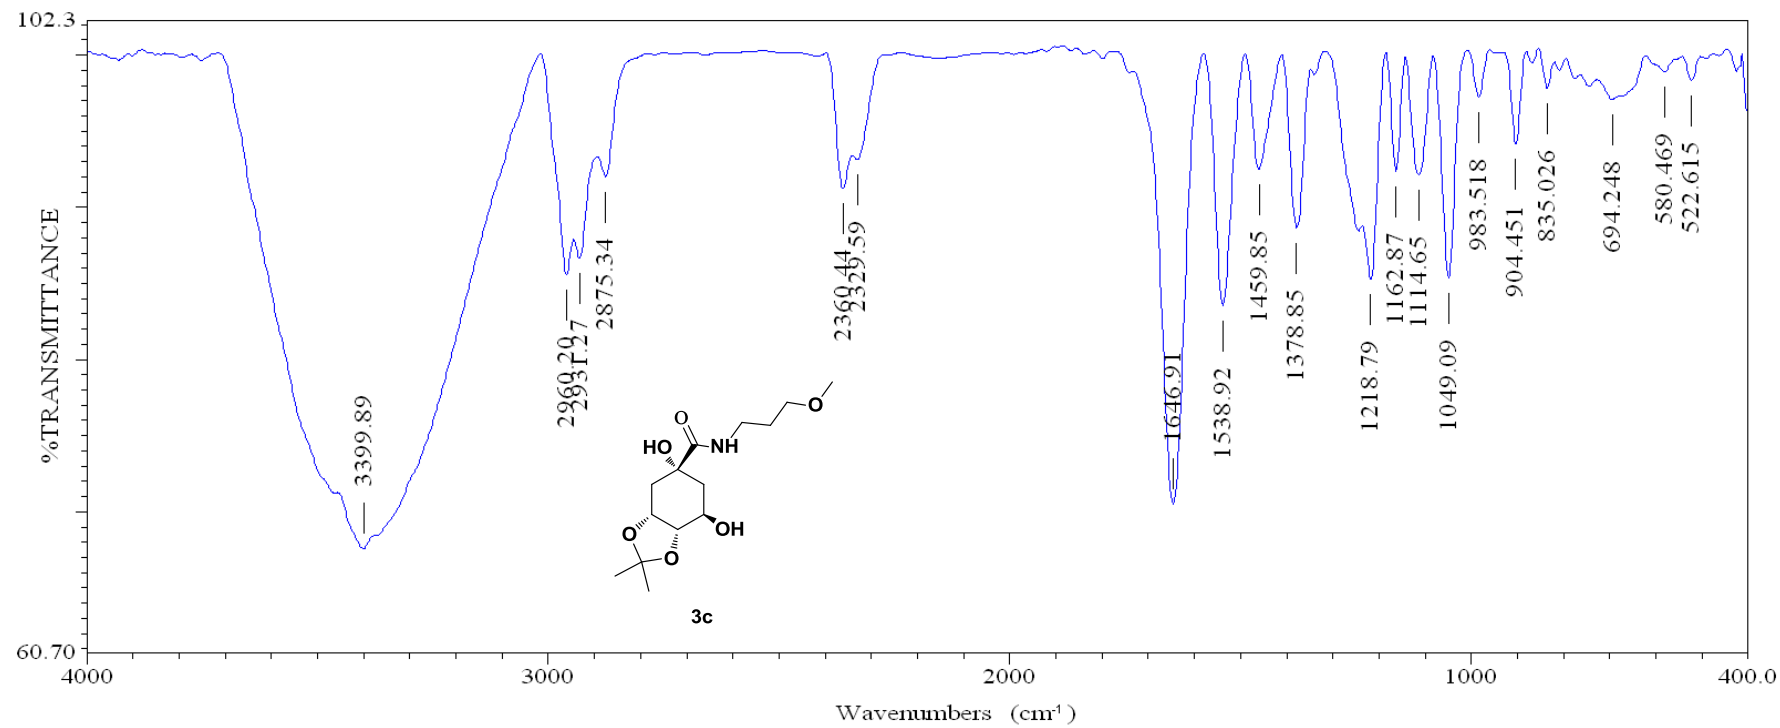

SPEC: lei2825  
Samp: 1317-leeut-D03  
Mode: EI +VE +LMR BSCAN (EXP) UP LR NRM  
Oper:  
Base: 89.1 Inten : 3636902  
Norm: 89.1 RIC : 65233216  
Peak: 1000.00 mmu  
Data: +/25>31

29-Feb-12 REG : 02:25.8 #9  
Start : 16:28:40 55

Inlet :  
Masses : 45 > 500  
#peaks: 474

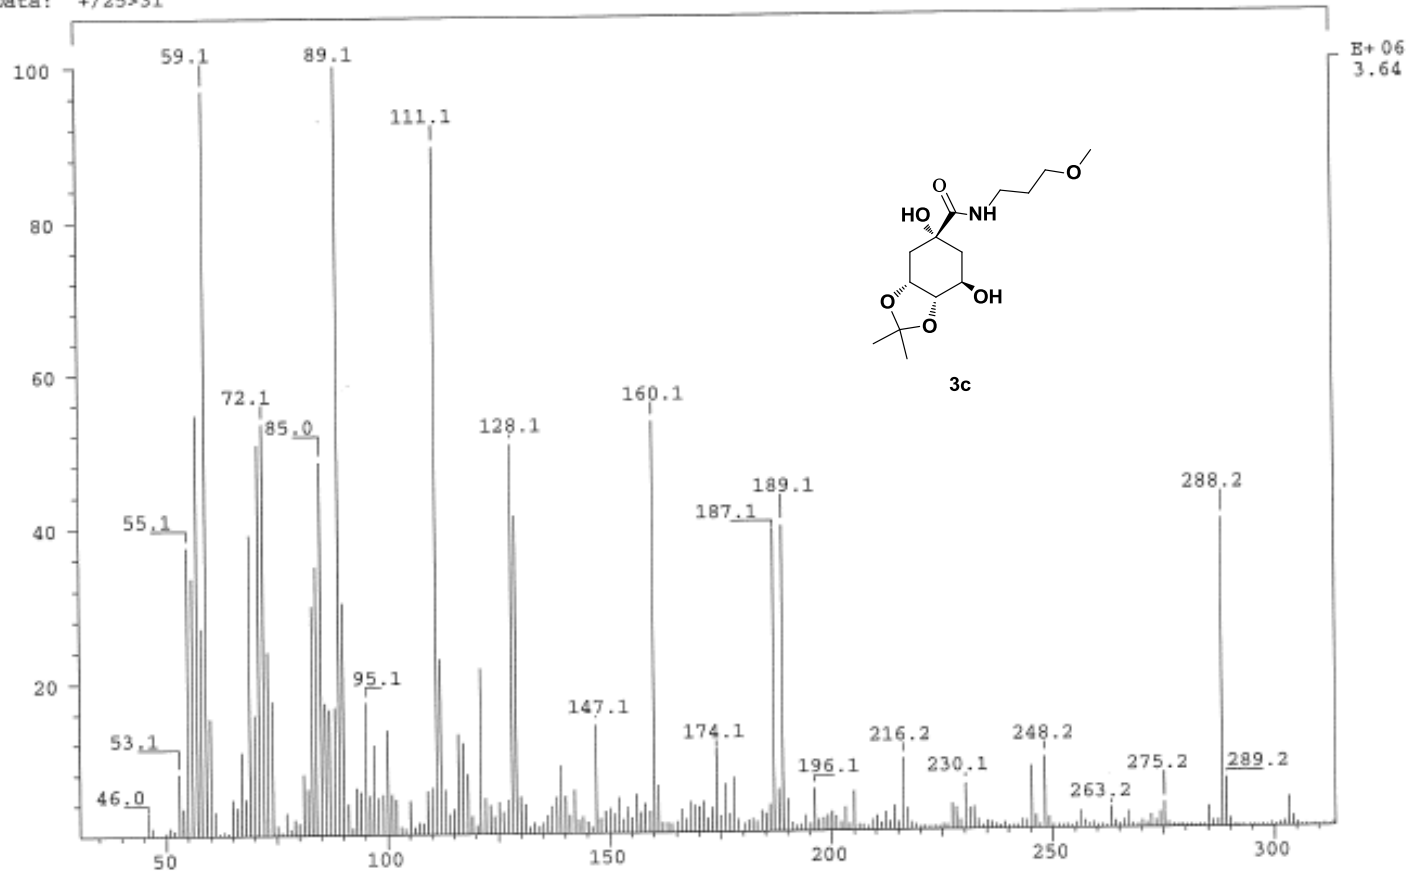

E+ 06  
3.64

LIST: heil434-c3 05-Mar-12 REG : 04:32.7 #9  
 Samp: 1317leeutd03 Start : 23:19:22 1045  
 Mode: EI +VE +LMR ESCAN (EXP) UP HR NRM Inlet :  
 Oper:  
 Limt: ( 0)  
 : (456) C25.H30.N.O7  
 Peak: 1000.00 mmu R+D: -2.0 > 60.0  
 Data: +/860>1019 (CMASS : converted; CMASS : converted; CMASS : conv

| Mass     | Intensity | %RA   | Flags | Delta (mmu) | R+D | Composition  |
|----------|-----------|-------|-------|-------------|-----|--------------|
| 303.1687 | 46831     | 18.41 | #     | -0.5        | 3.0 | C14.H25.N.O6 |

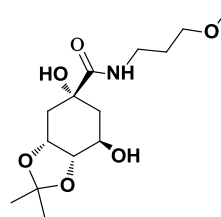

3c

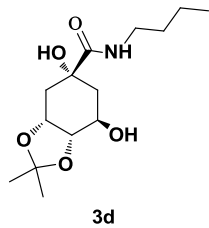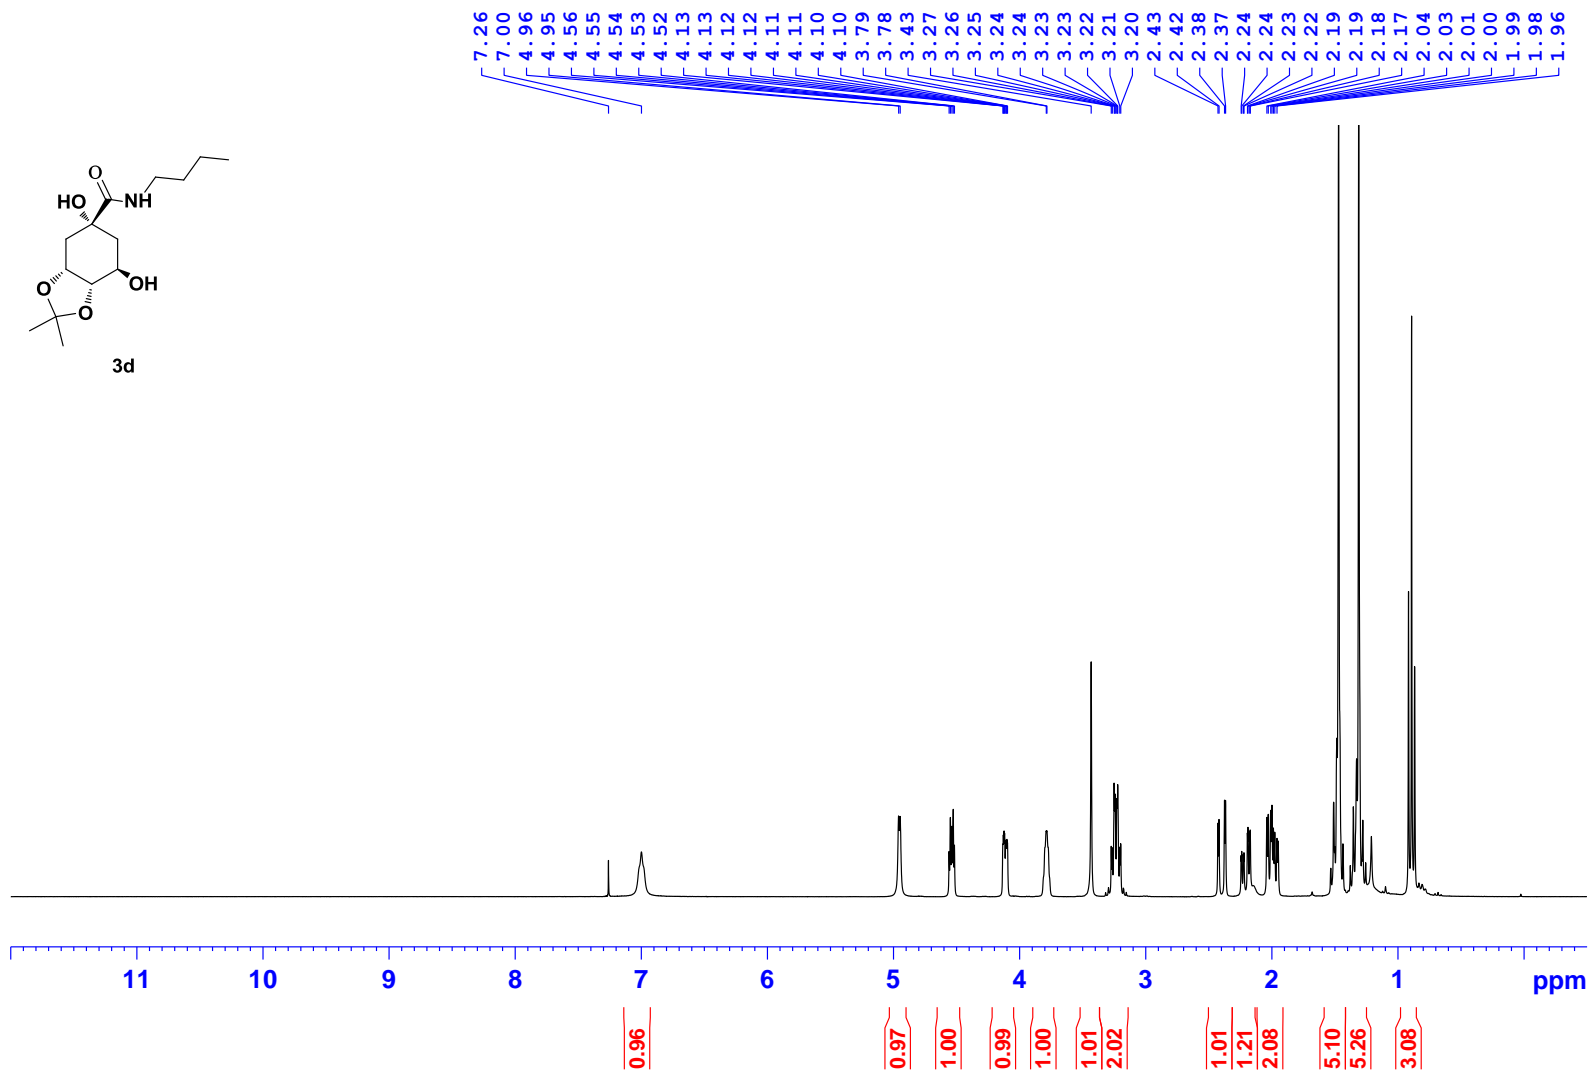

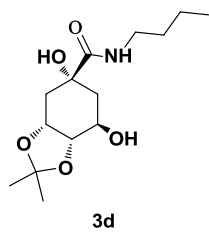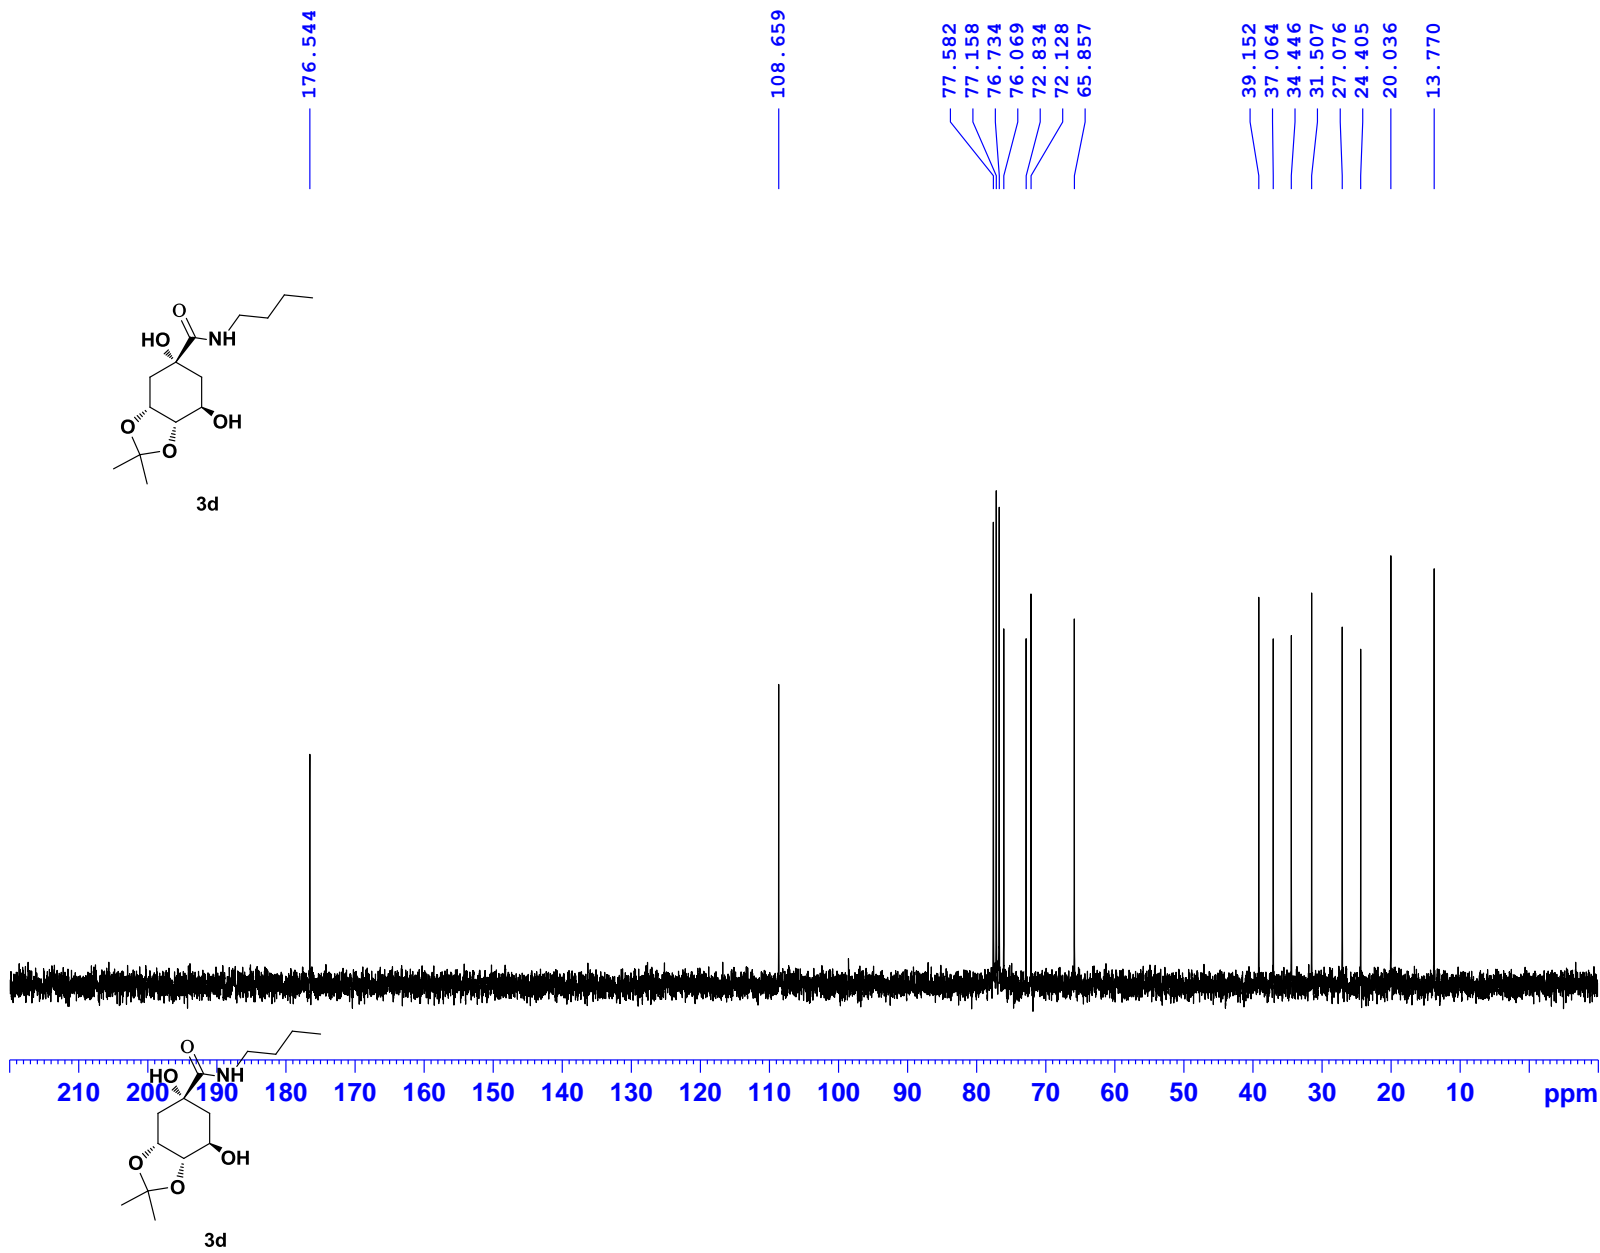

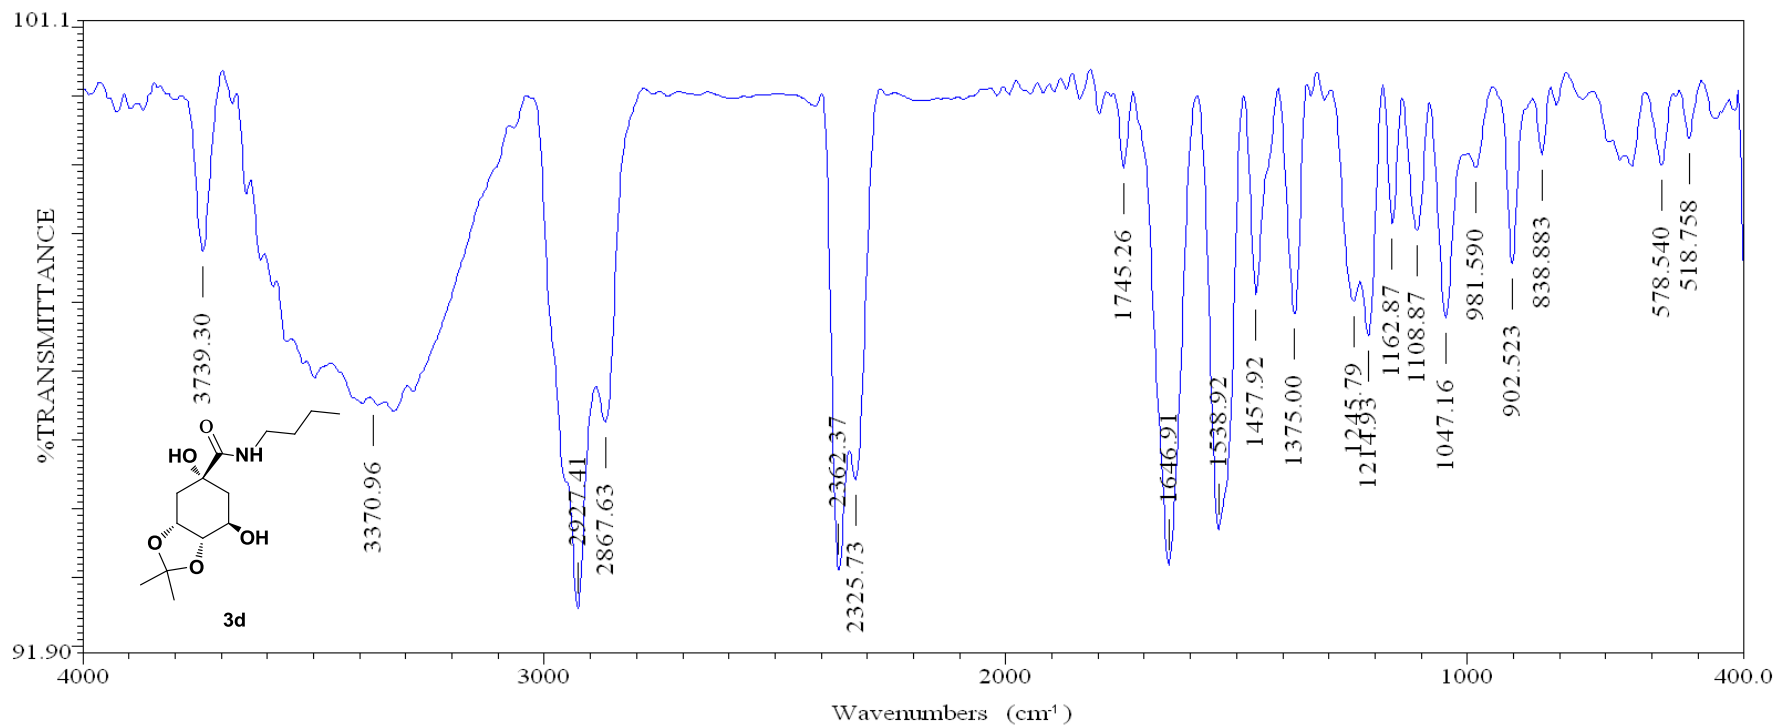

SPEC: lei2826  
Samp: 1318-leeut-D04  
Mode: EI +VE +LMR BSCAN (EXP) UP LR NRM  
Oper:  
Base: 59.1 Inten: 17629092 Inlet: Masses: 45 > 500 #9  
Norm: 59.1 RIC: 127014707 Start: 16:38:00 61  
Peak: 1000.00 mmu  
Data: +/5>9

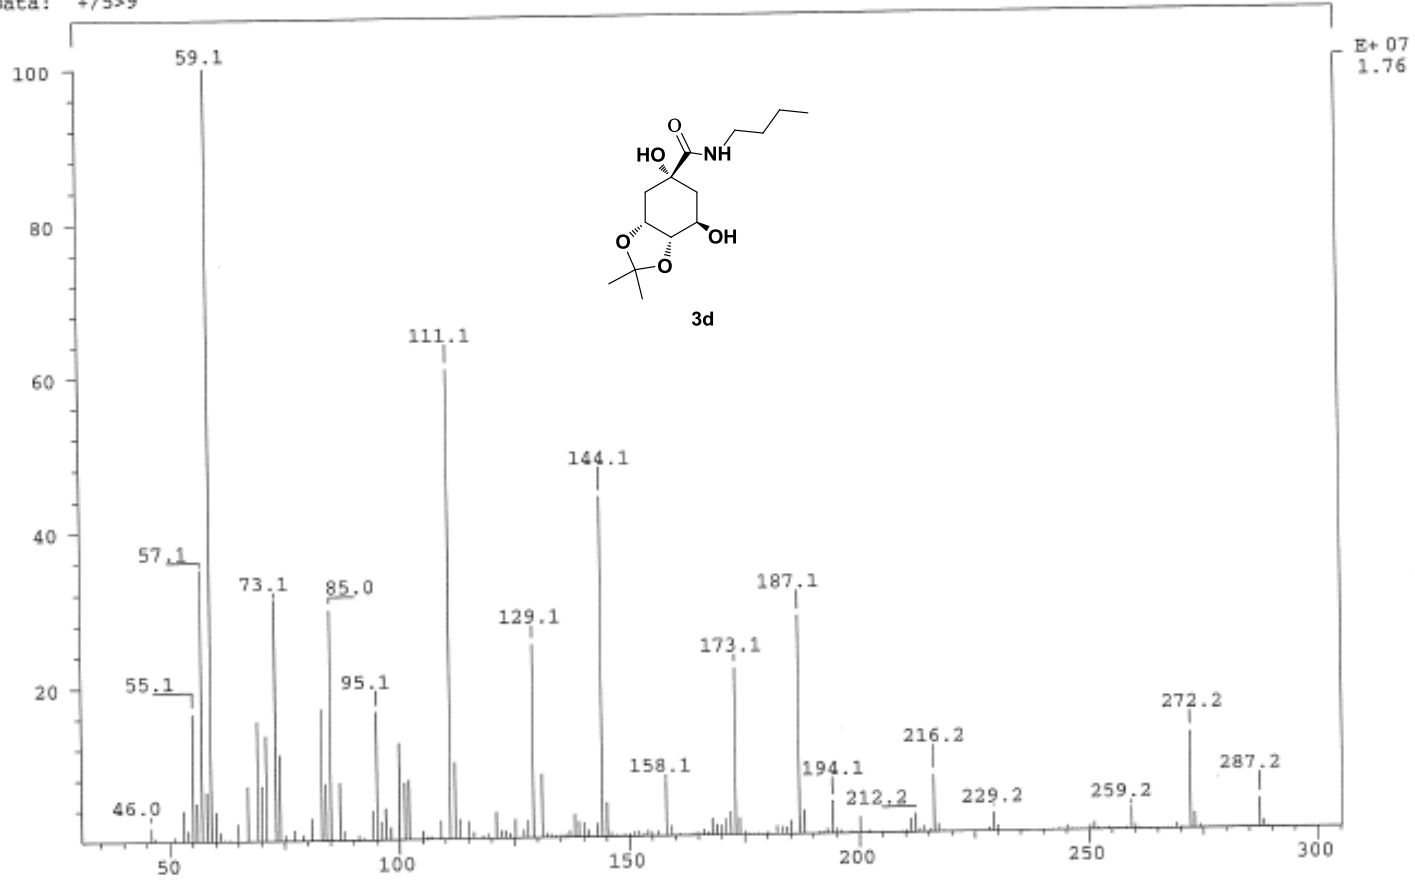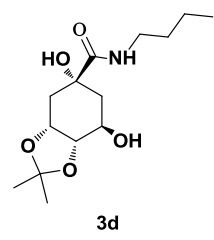

E+ 07  
1.76

LIST: heil433-cl 05-Mar-12 REG : 02:32.7 #9  
 Samp: 131@leeutD04 Start : 22:37:30 595  
 Mode: EI +VE +LMR ESCAN (EXP) UP HR NRM Inlet :  
 Oper:  
 Limt: ( 0)  
 : (456) C25.H30.N.07  
 Peak: 1000.00 mmu R+D: -2.0 > 60.0  
 Data: +/453>552 (CMASS : converted | CMASS : converted | CMASS : conve

| Mass     | Intensity | %RA    | Flags | Delta (mmu) | R+D | Composition  |
|----------|-----------|--------|-------|-------------|-----|--------------|
| 287.1725 | 1596276   | 100.00 | #     | 0.8         | 3.0 | C14.H25.N.O5 |

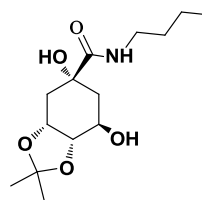

3d



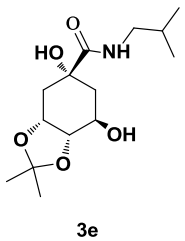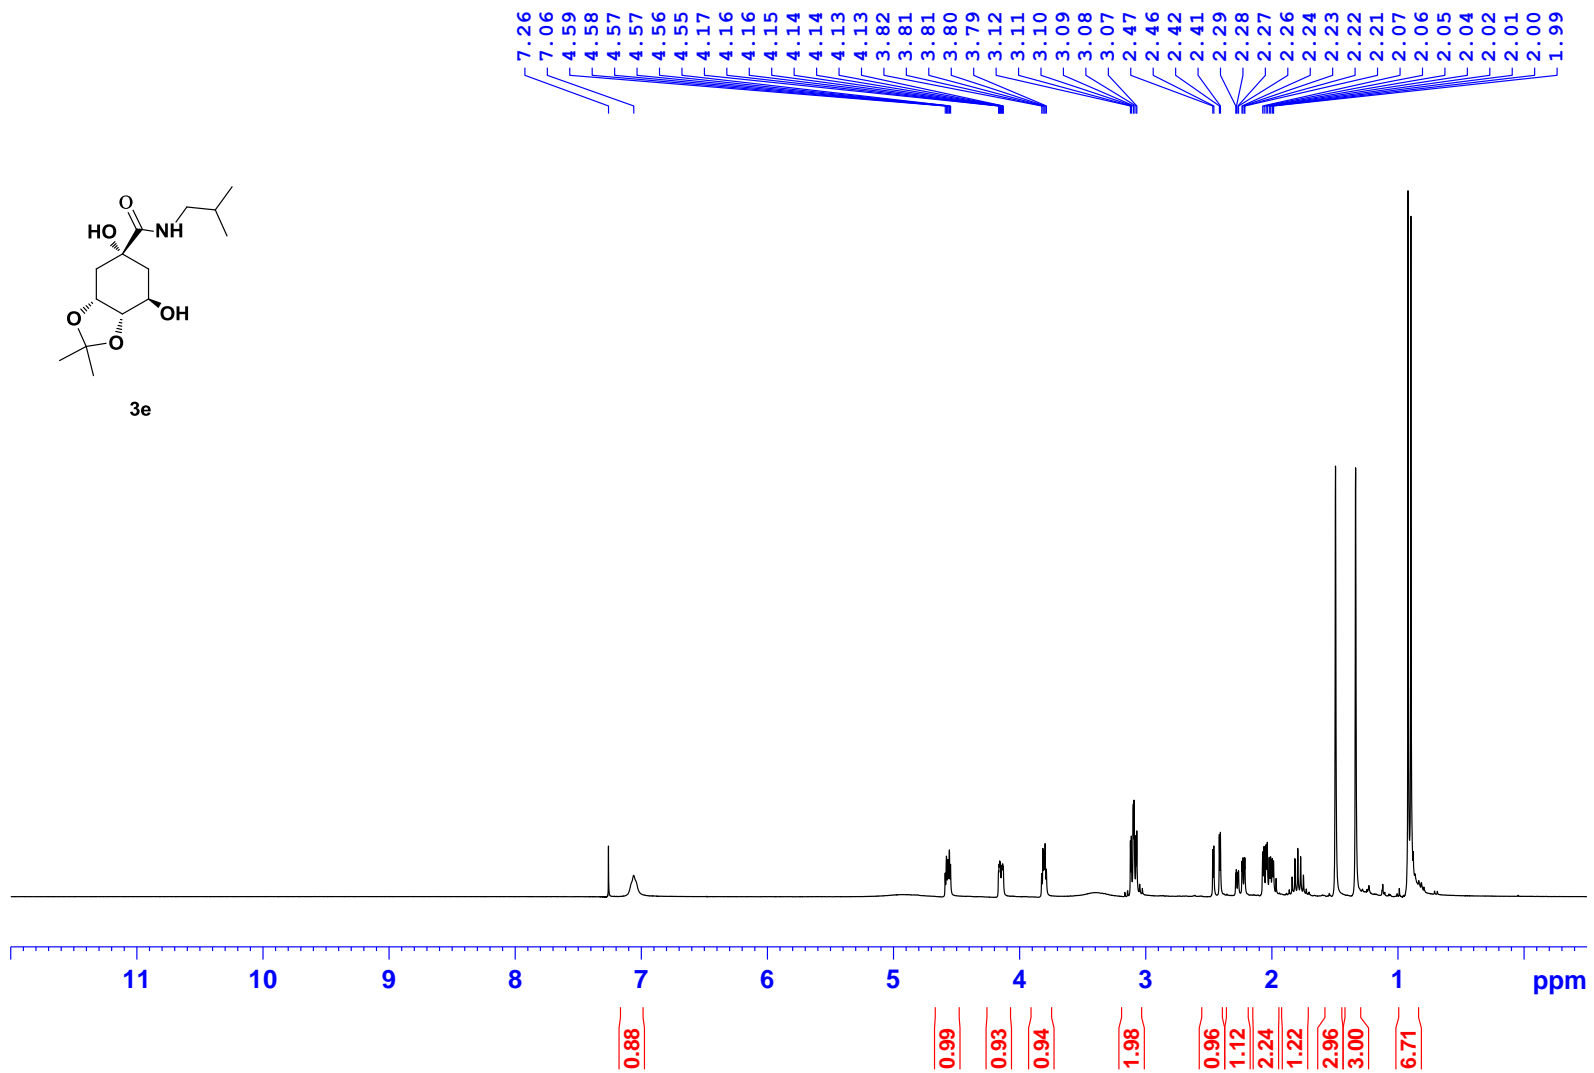

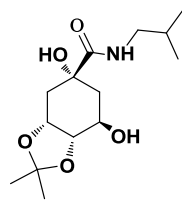

3e

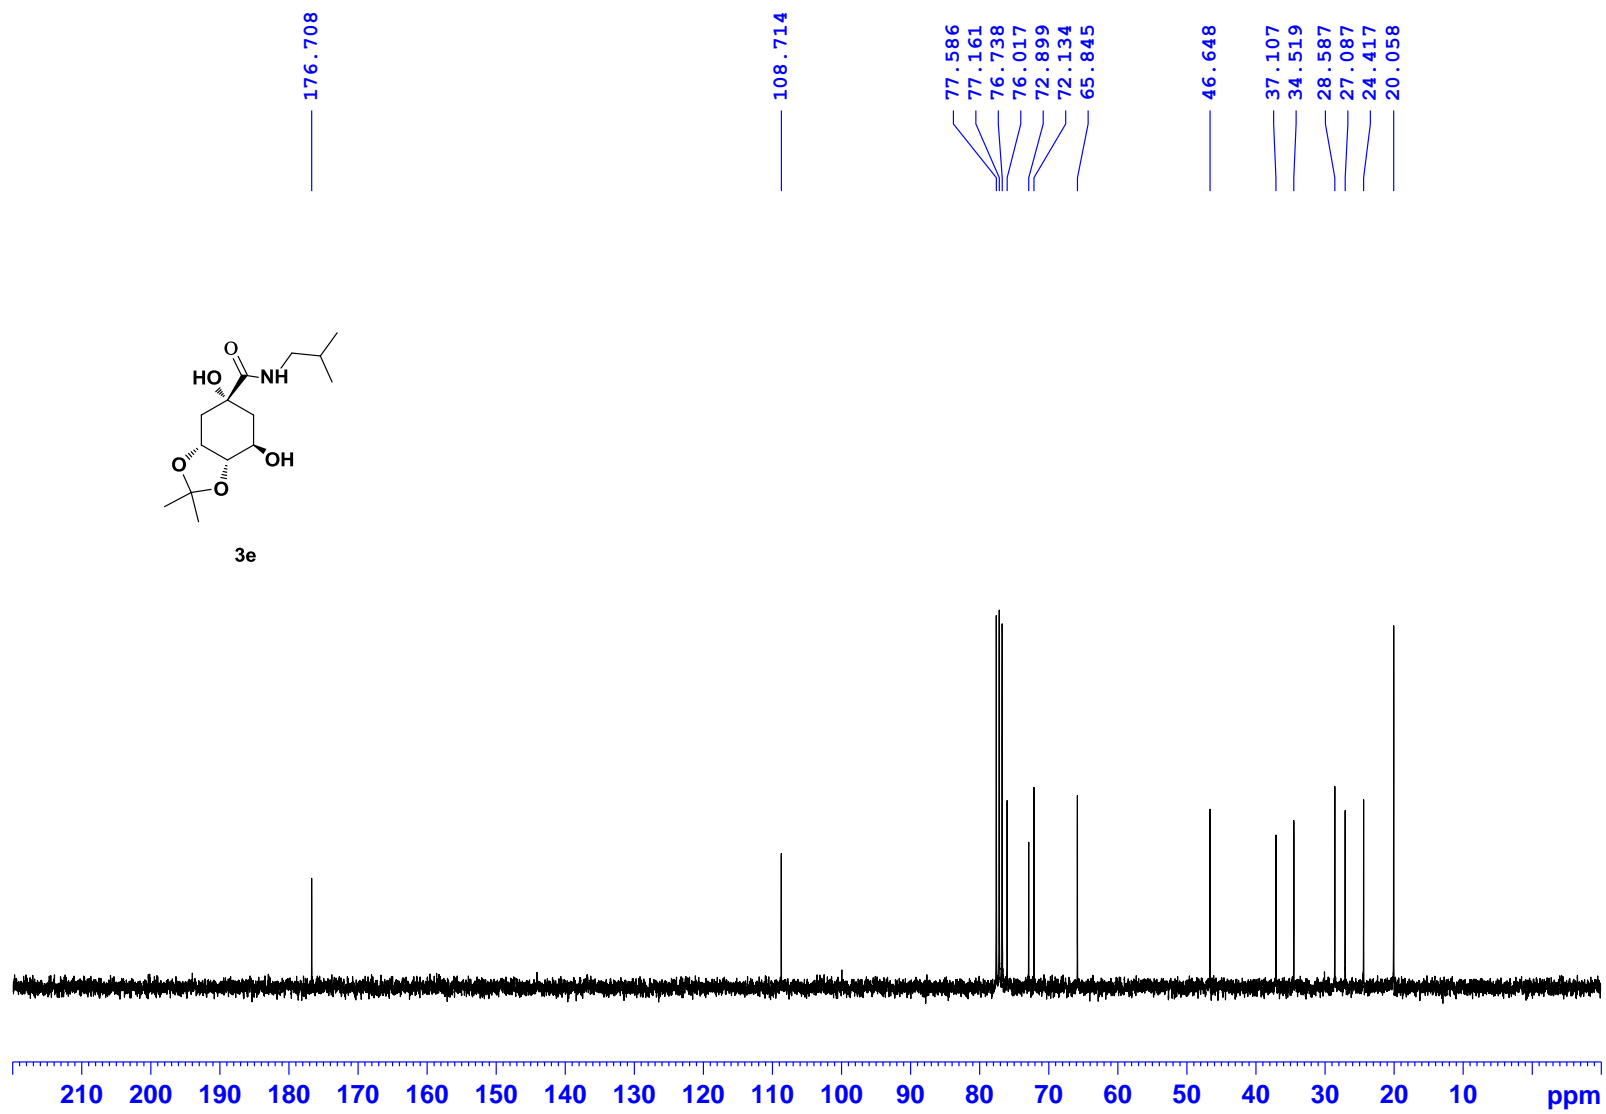

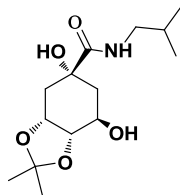

3e

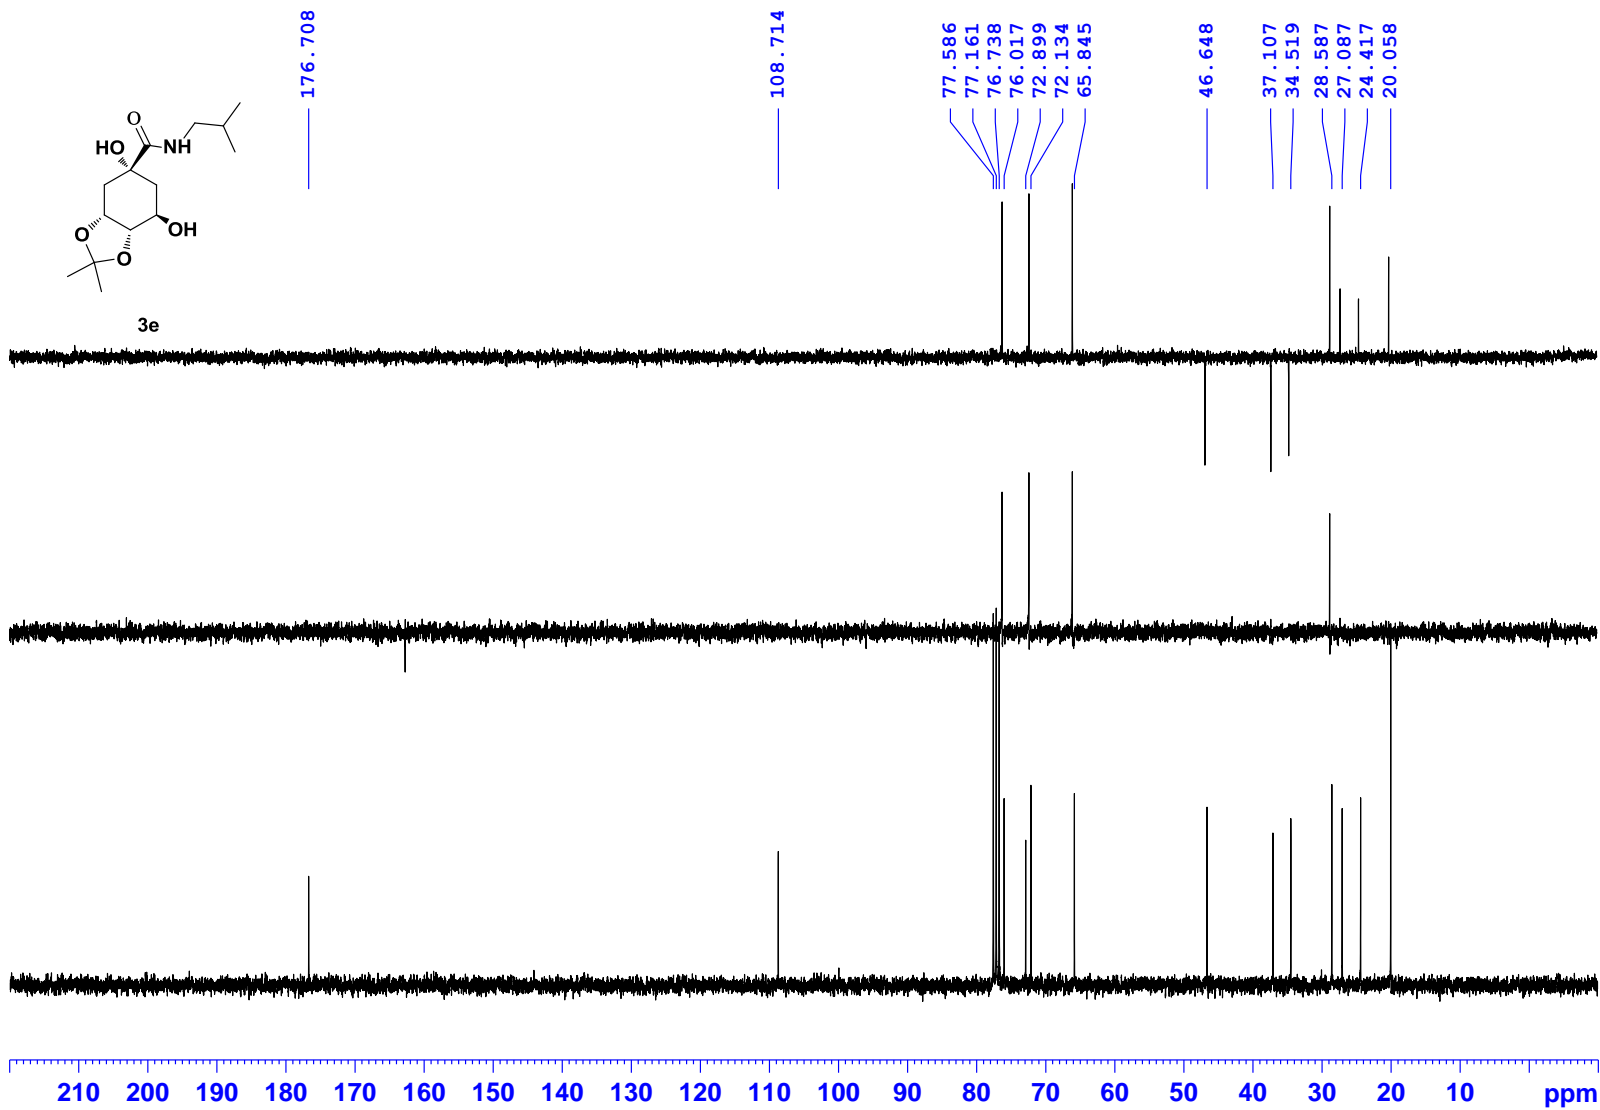

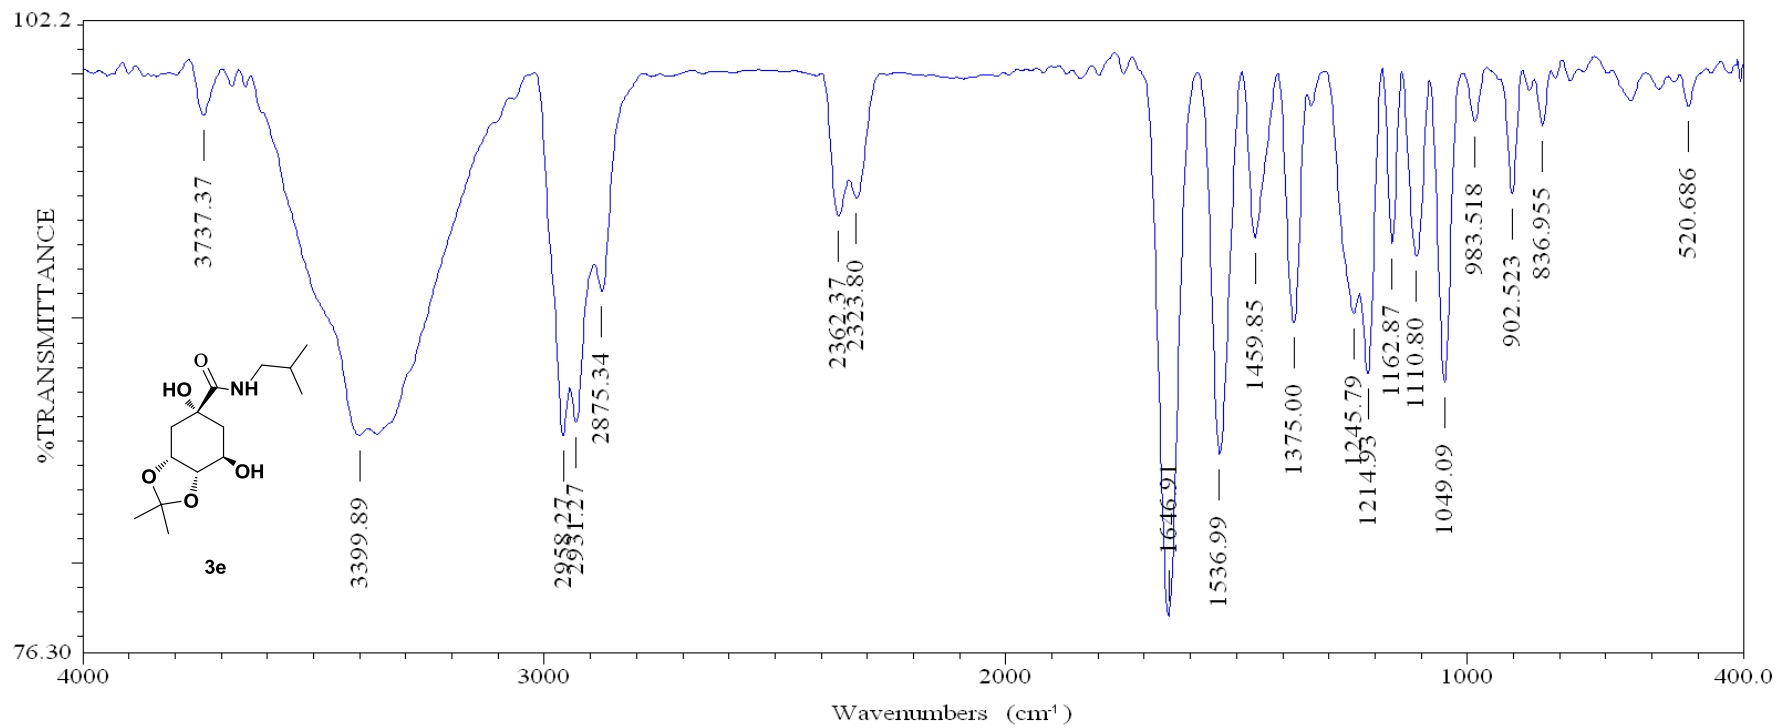

SPEC: lei2827  
Samp: 1319-leeut-D05  
Mode: EI +VE +LMR BSCAN (EXP) UP LR NRM  
Oper:  
Base: 59.1 Inten: 11732574  
Norm: 59.1 RIC: 130626270  
Peak: 1000.00 mma  
Data: +/10>37

01-Mar-12 REG: 00:55.6 #9  
Start: 07:30:06 133  
Inlet:  
Masses: 45 > 500  
#peaks: 517

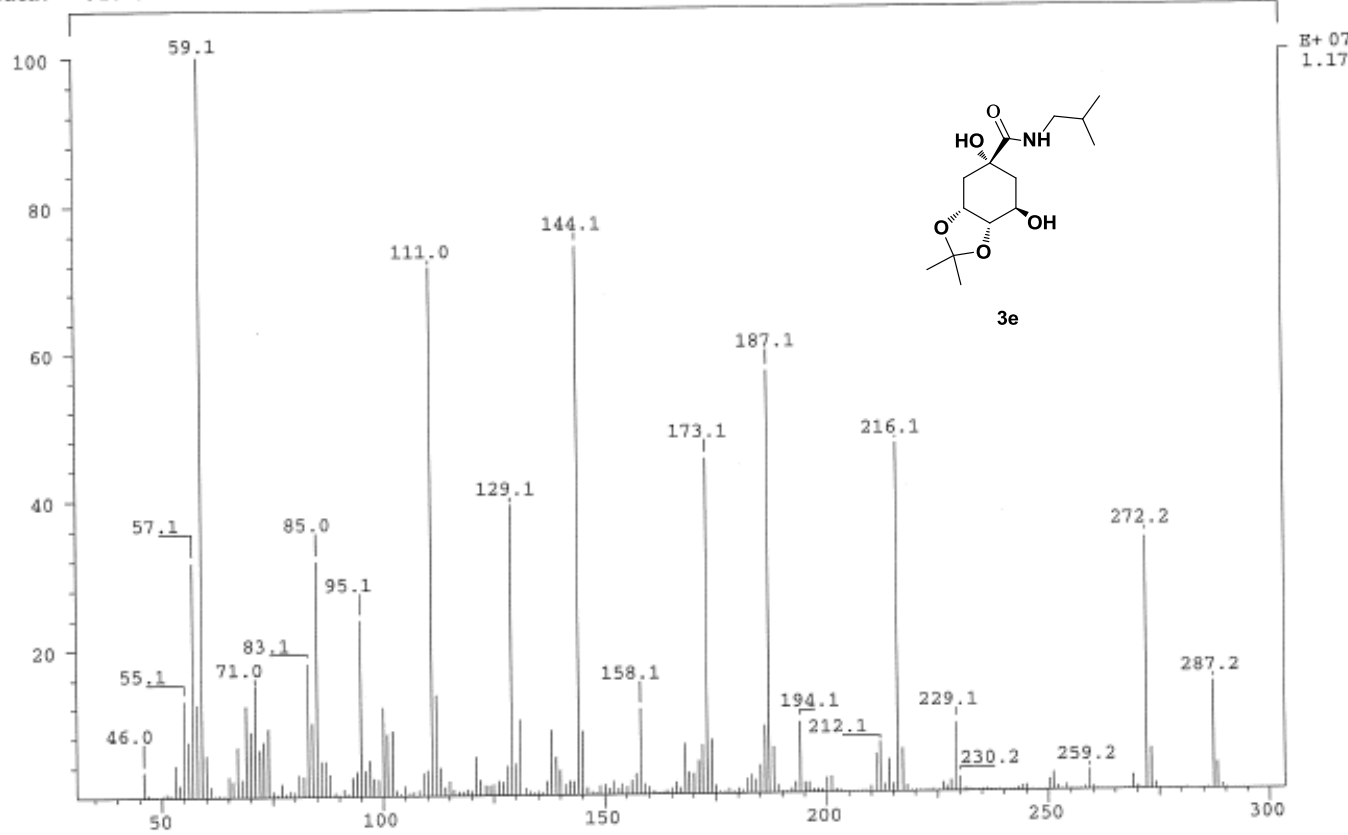

E+ 07  
1.17

LIST: hei1432-c2 05-Mar-12 REG : 01:07.9 #9  
 Samp: 1319leeutD05 Start : 22:18:12 637  
 Mode: EI +VE +LMR ESCAN (EXP) UP HR NRM  
 Oper: Inlet :  
 Limt: ( 0)  
 : (456) C25.H30.N.07  
 Peak: 1000.00 mmu R+D: -2.0 > 60.0  
 Data: +/197>307 (CMASS : converted; CMASS : converted | CMASS : conve

| Mass     | Intensity | %RA    | Flags | Delta (mmu) | R+D | Composition  |
|----------|-----------|--------|-------|-------------|-----|--------------|
| 287.1726 | 2544634   | 100.00 | #     | 0.7         | 3.0 | C14.H25.N.O5 |

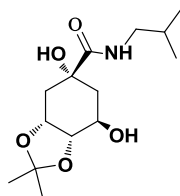

3e

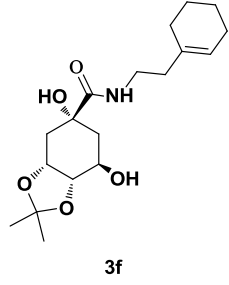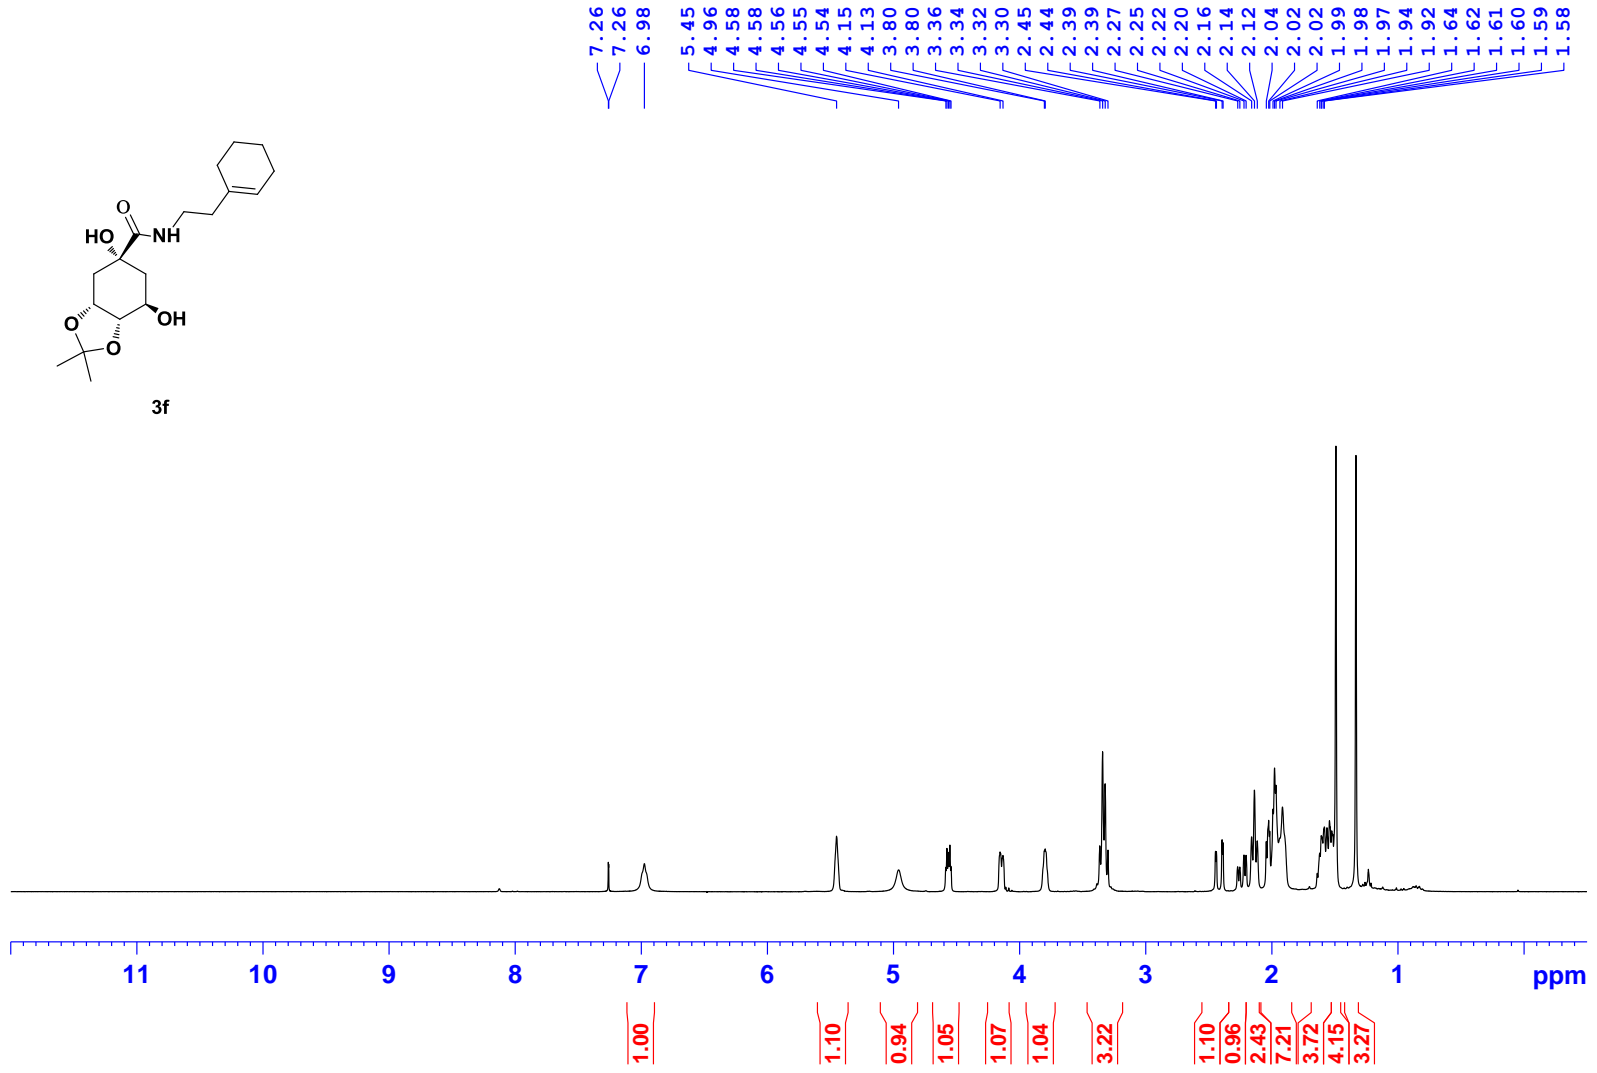

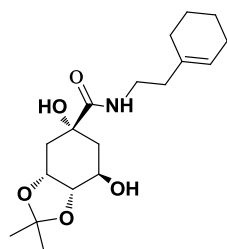

3f

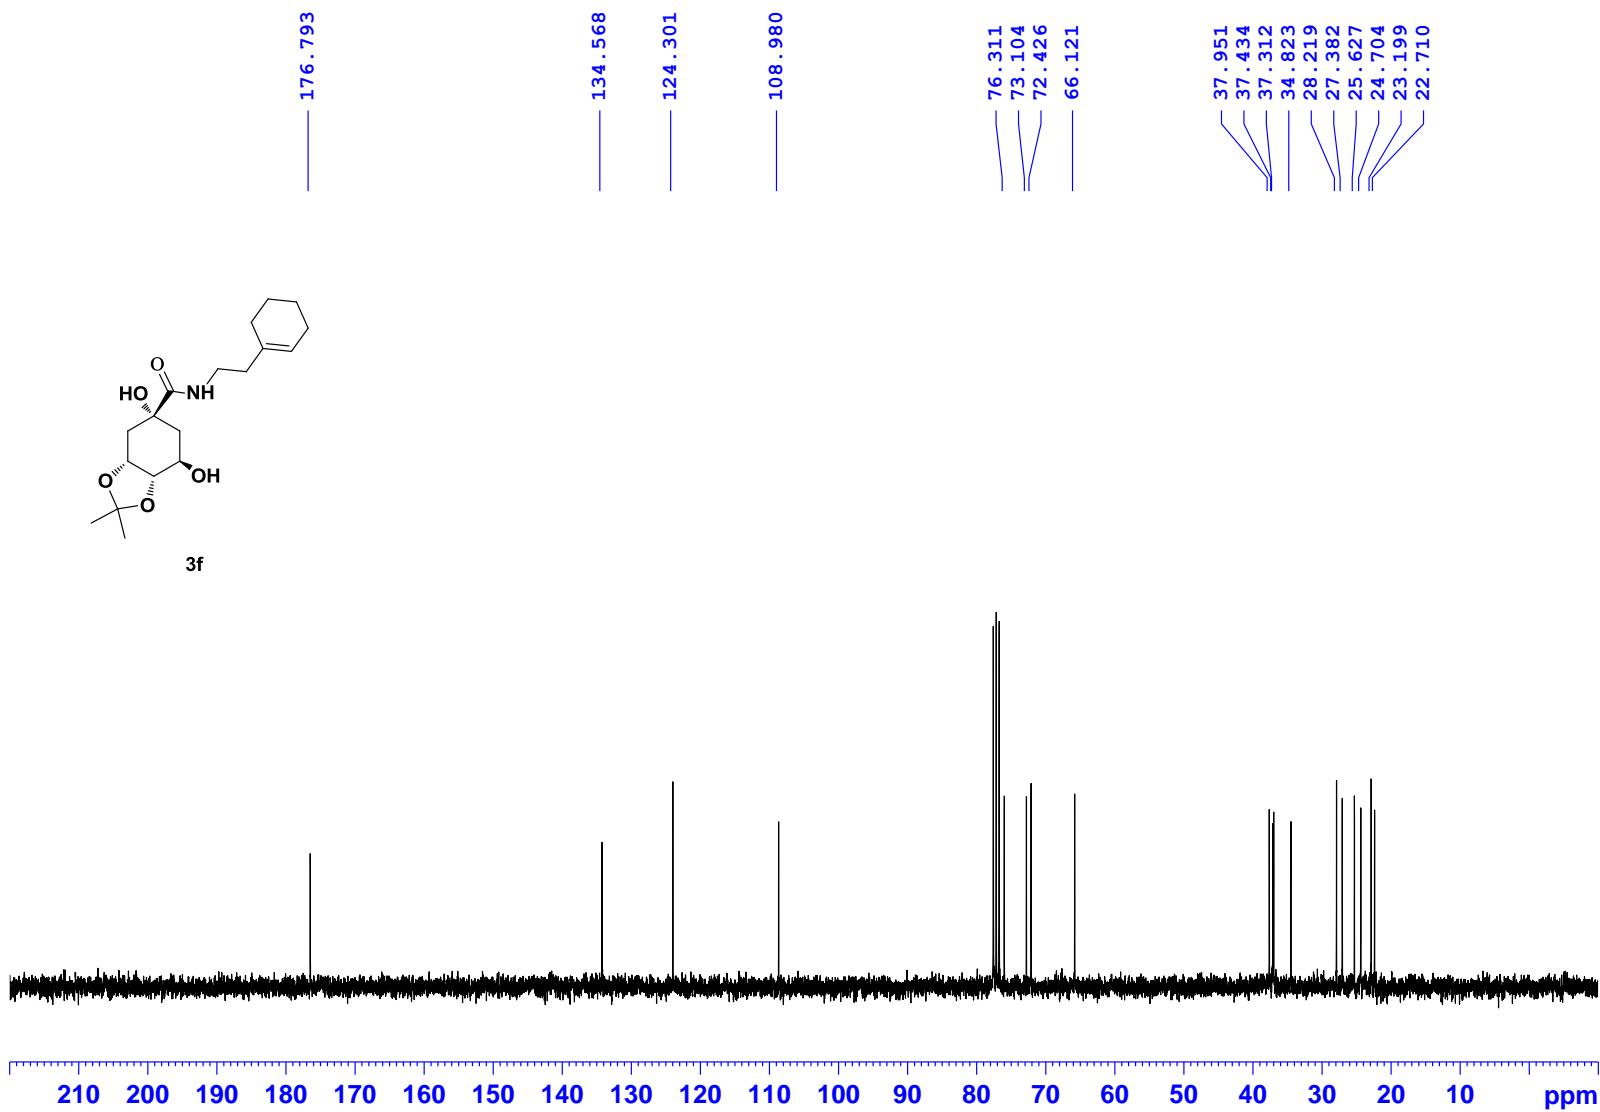



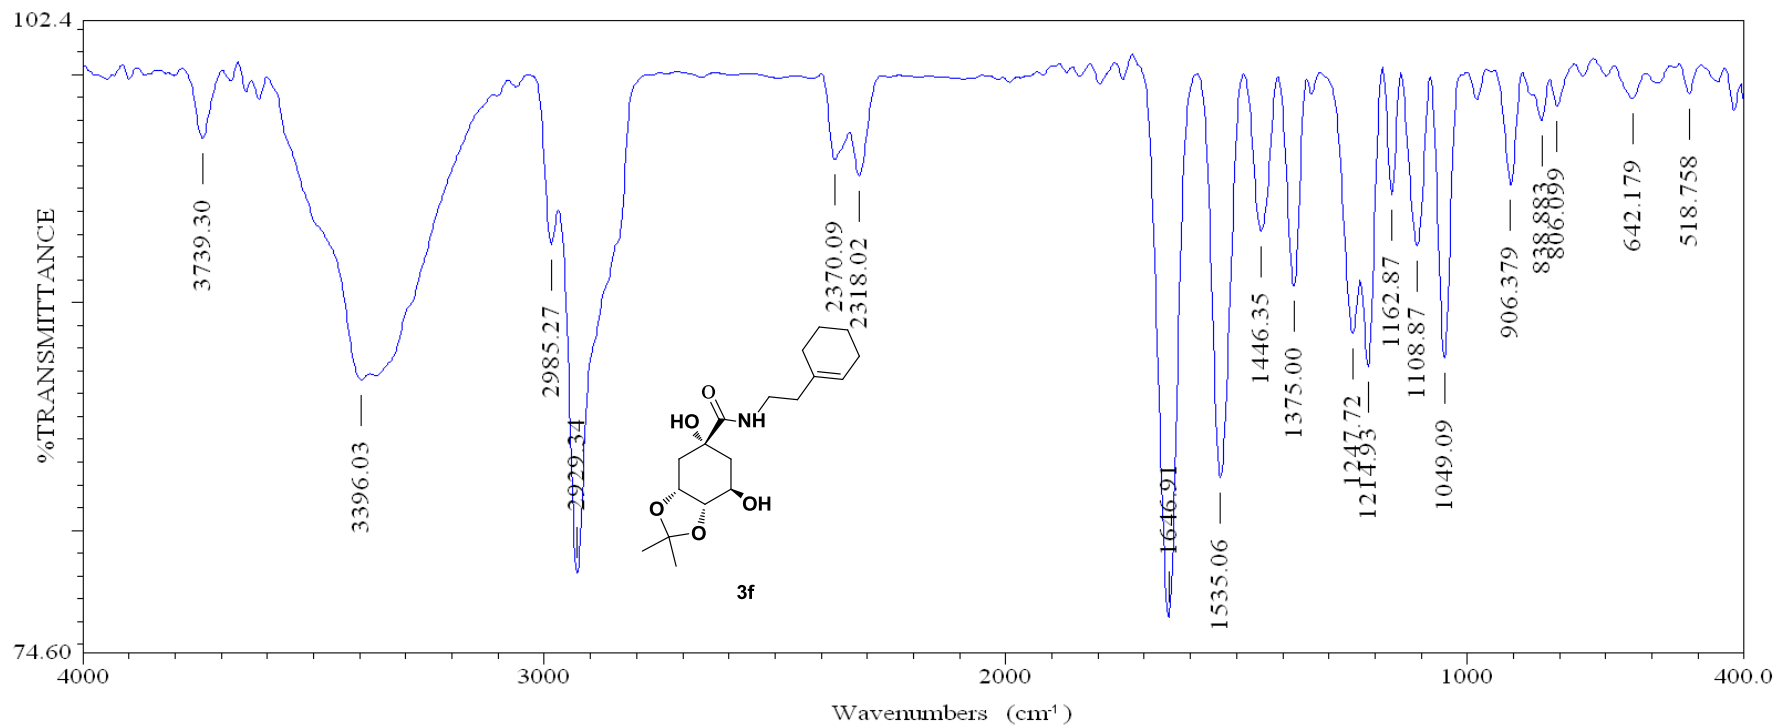

SPEC: 1e12828  
Samp: 1320-leeut-D06  
Mode: EI +VE +LMR BSCAN (EXP) UP LR NRM  
Oper:  
Base: 174.1 Inten : 1541023  
Norm: 174.1 RIC : 34943518  
Peak: 1000.00 mmu  
Data: +/14>41

01-Mar-12 REG : 01:22.2 #9  
Start : 07:58:47 105  
Inlet :  
Masses: 45 > 500  
#peaks: 506

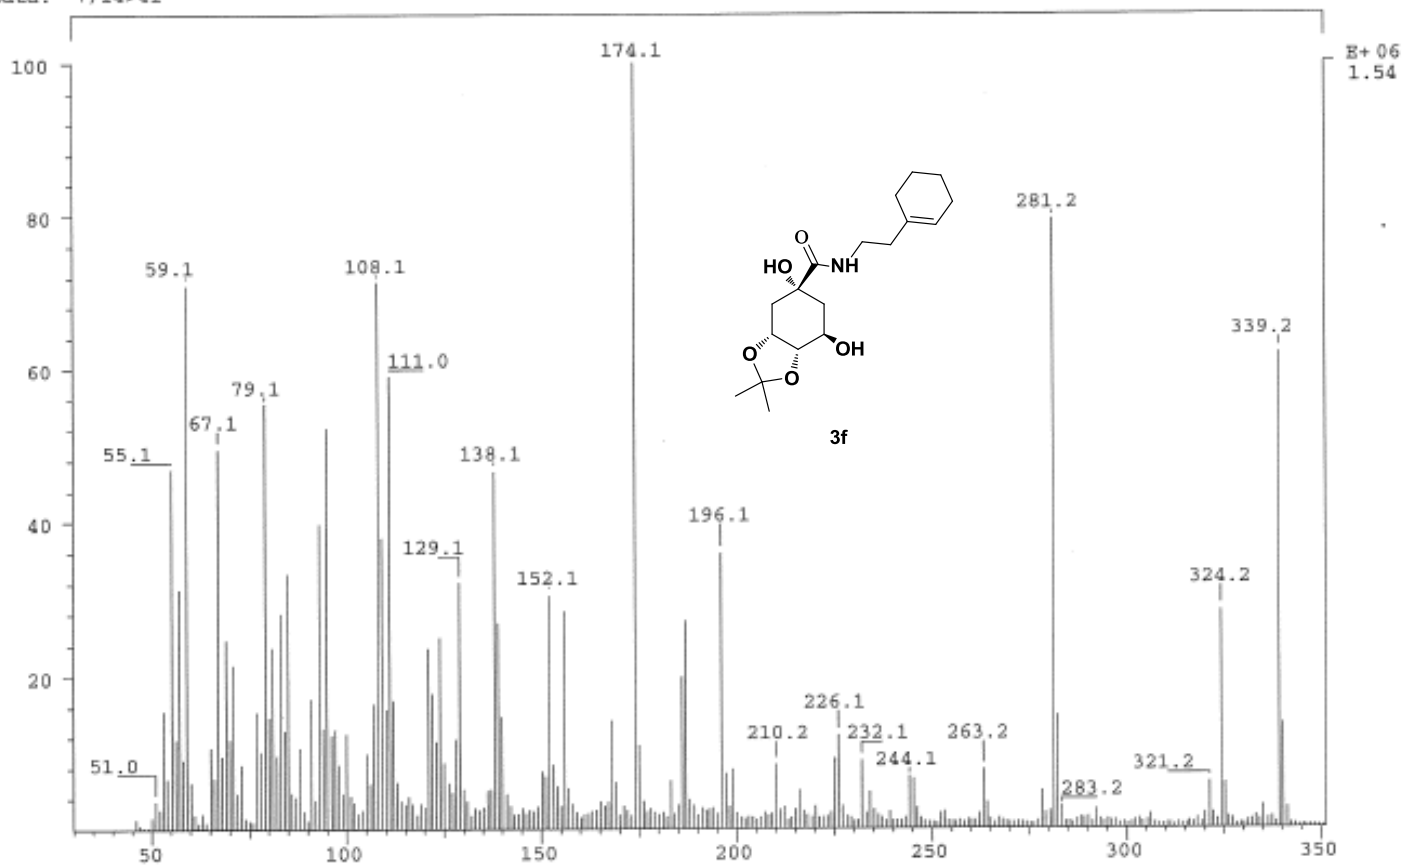

LIST: hei1430-c4 05-Mar-12 REG : 01:13.4 #9  
 Samp: 13201eeutD6 Start : 21:13:32 2832  
 Mode: EI +VE +LMR ESCAN (EXP) UP HR NRM  
 Oper: Inlet :  
 Limit: ( 0)  
 : (440) C25.H30.N.O6  
 Peak: 1000.00 mmu R+D: -2.0 > 60.0  
 Data: +/217>499 (CMASS : converted |CMASS : converted |CMASS : conve

| Mass     | Intensity | %RA    | Flags | Delta (mmu) | R+D | Composition  |
|----------|-----------|--------|-------|-------------|-----|--------------|
| 339.2055 | 7855517   | 100.00 | #     | -0.9        | 5.0 | C18.H29.N.O5 |

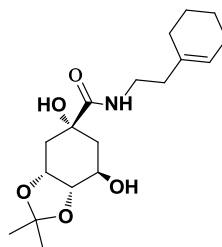

3f

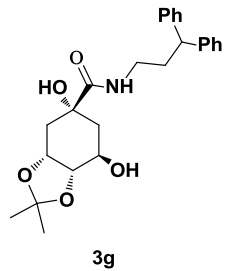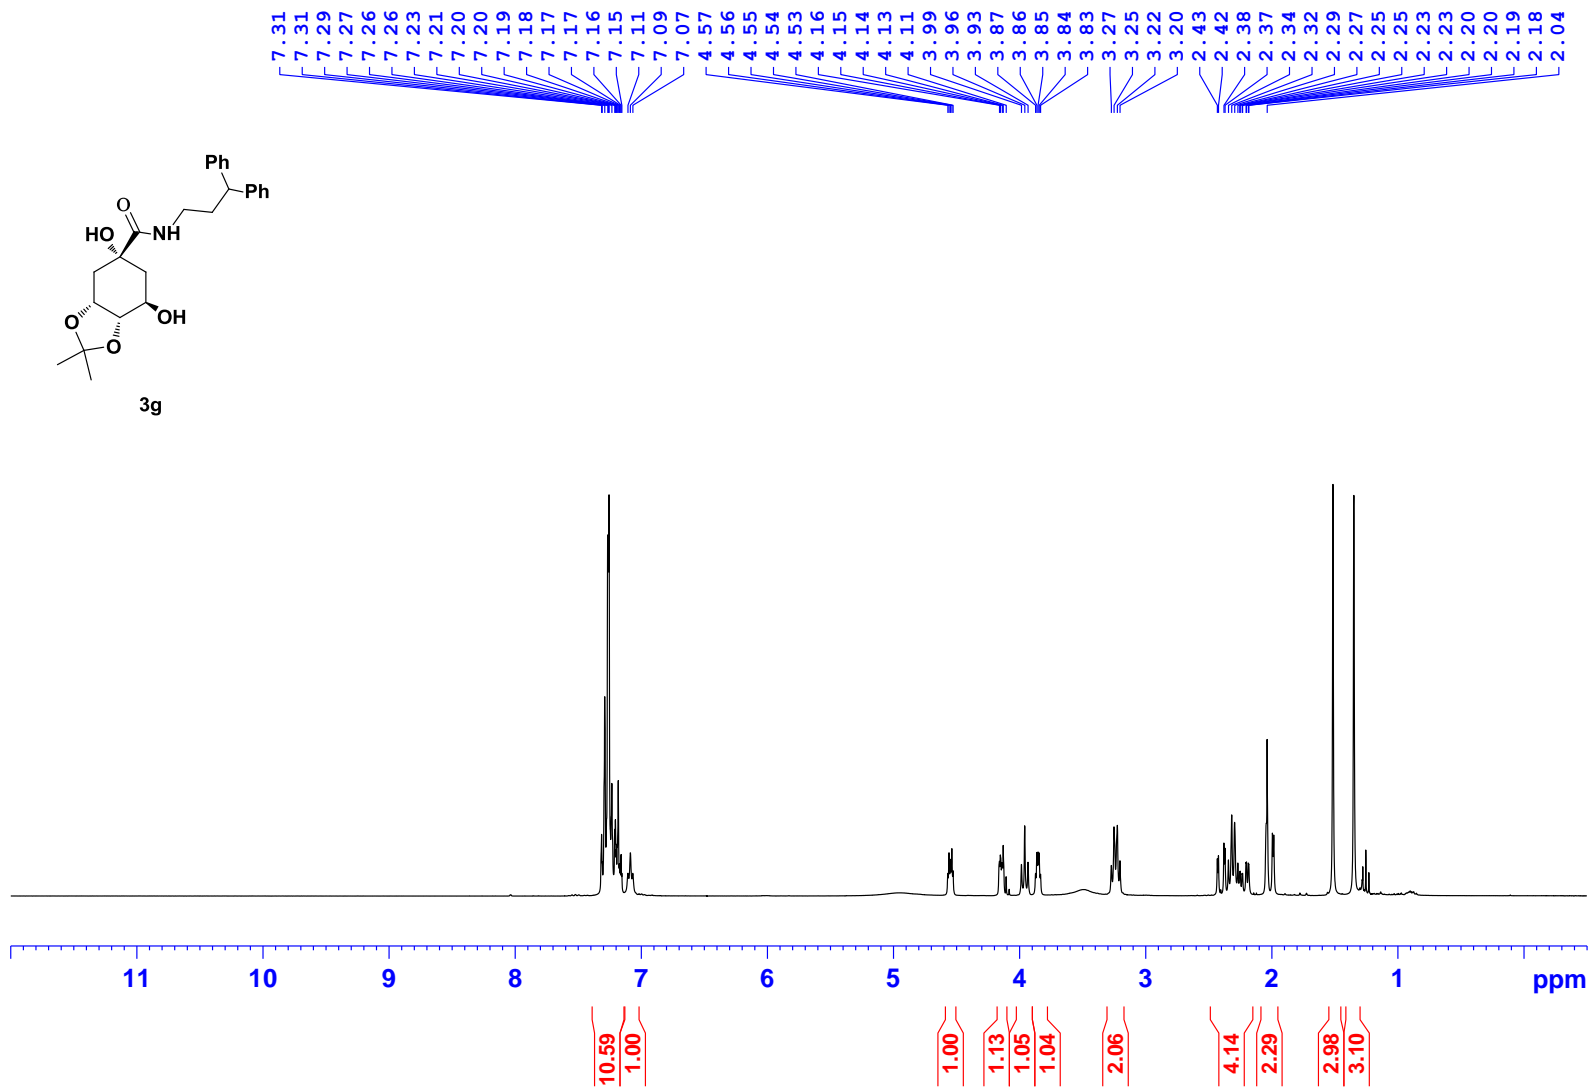

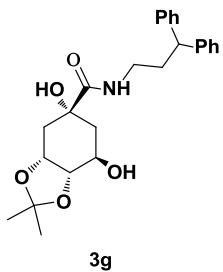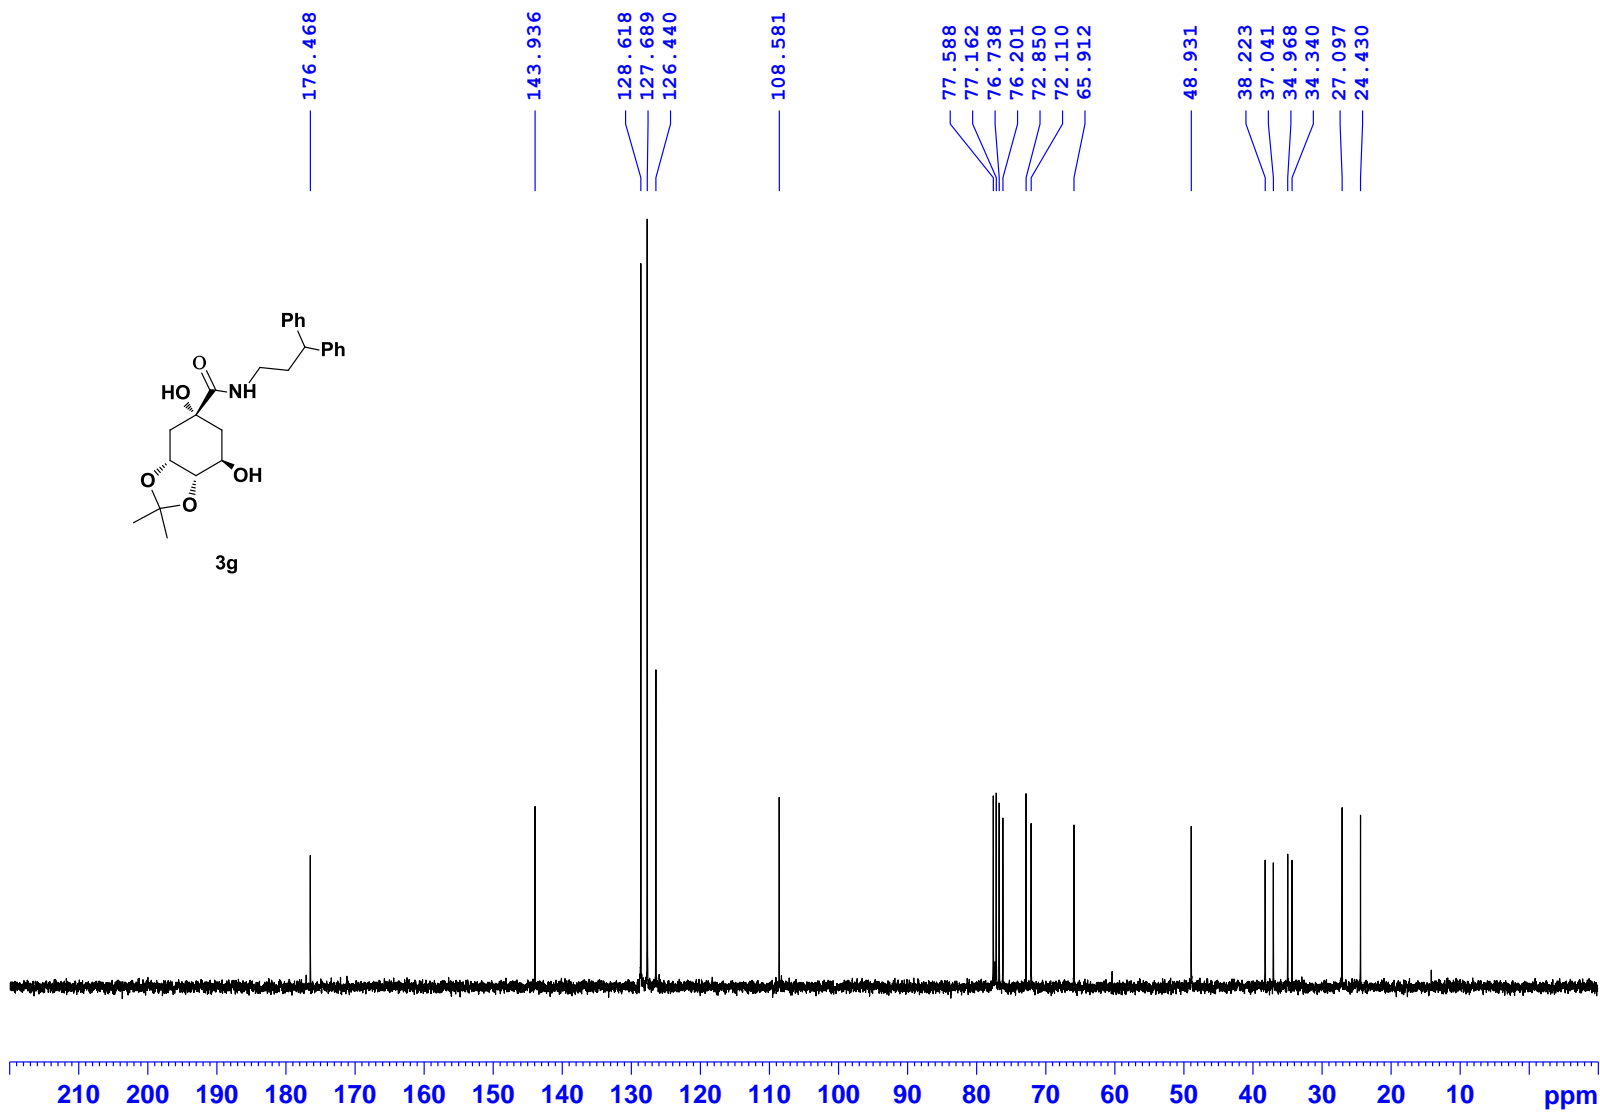

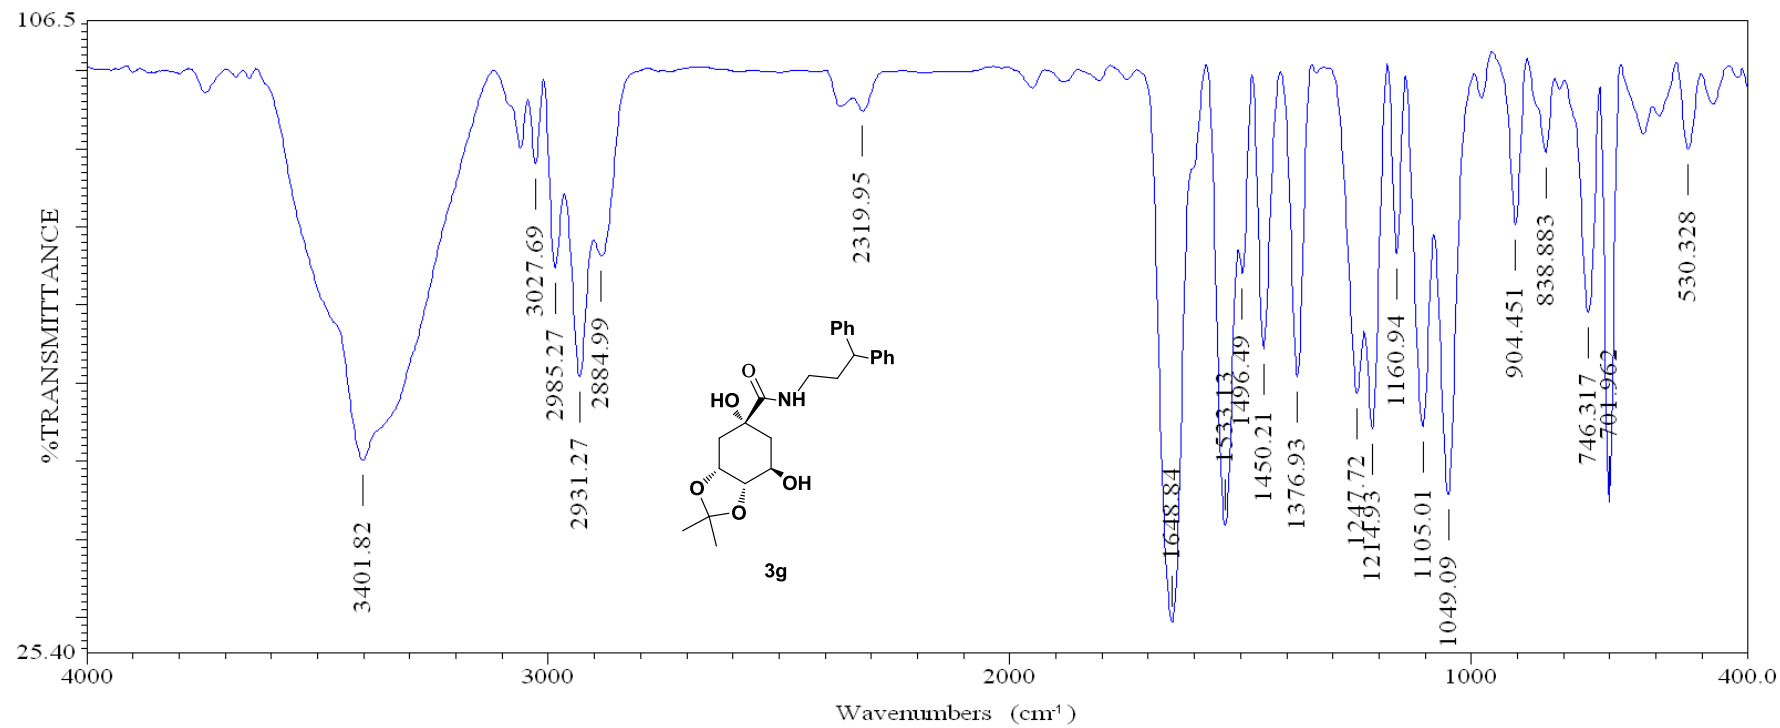

[ Mass Spectrum ]

Date : 1020510-813

Date : 10-May-2011 11:26

Sample: lecut-007

Note : 425.52

Inlet : Direct

Ion Mode : EI+

Spectrum Type : Normal Ion [MF-Linear]

RT : 0.16 min Scan# : (1,14)

BP : m/z 167.0000 Int. : 19.52

Output m/z range : 50.0000 to 470.0000

Cut Level : 10.00 %

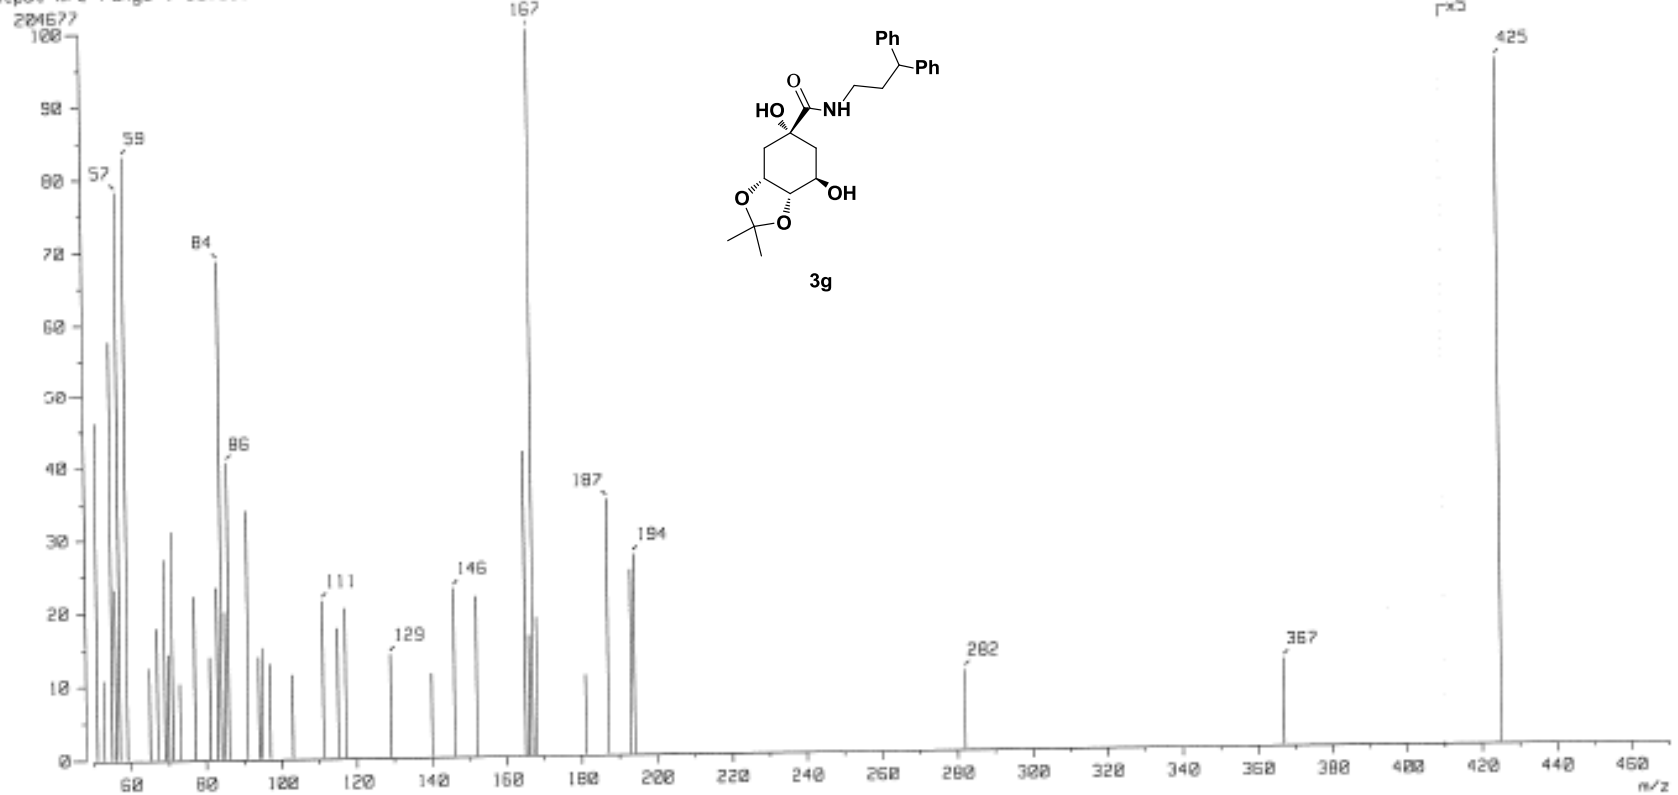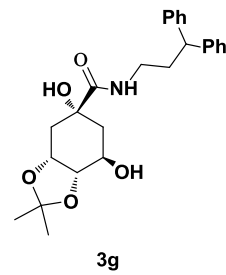

[ Elemental Composition ]

Data : 1000512-010

Sample: Leeut-D07

Note : 425.52

Inlet : Direct

RT : 0.52 min

Elements : C 25/0, H 36/0, N 1/0, O 5/0

Mass Tolerance : 10ppm, 3mmu if m/z < 300, 20mmu if m/z > 2000

Unsaturation (U.S.) : -0.5 - 200.0

Date : 12-May-2011 11:39

Ion Mode : EI+

Scan#: 34

Page: 1

| Observed m/z | Int%  | Err [ppm / mmu] | U.S. | Composition     |
|--------------|-------|-----------------|------|-----------------|
| 425.2202     | 100.0 | -0.1 / +0.0     | 11.0 | C 25 H 31 N O 5 |

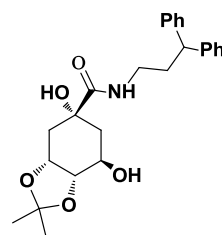

3g



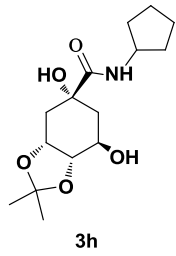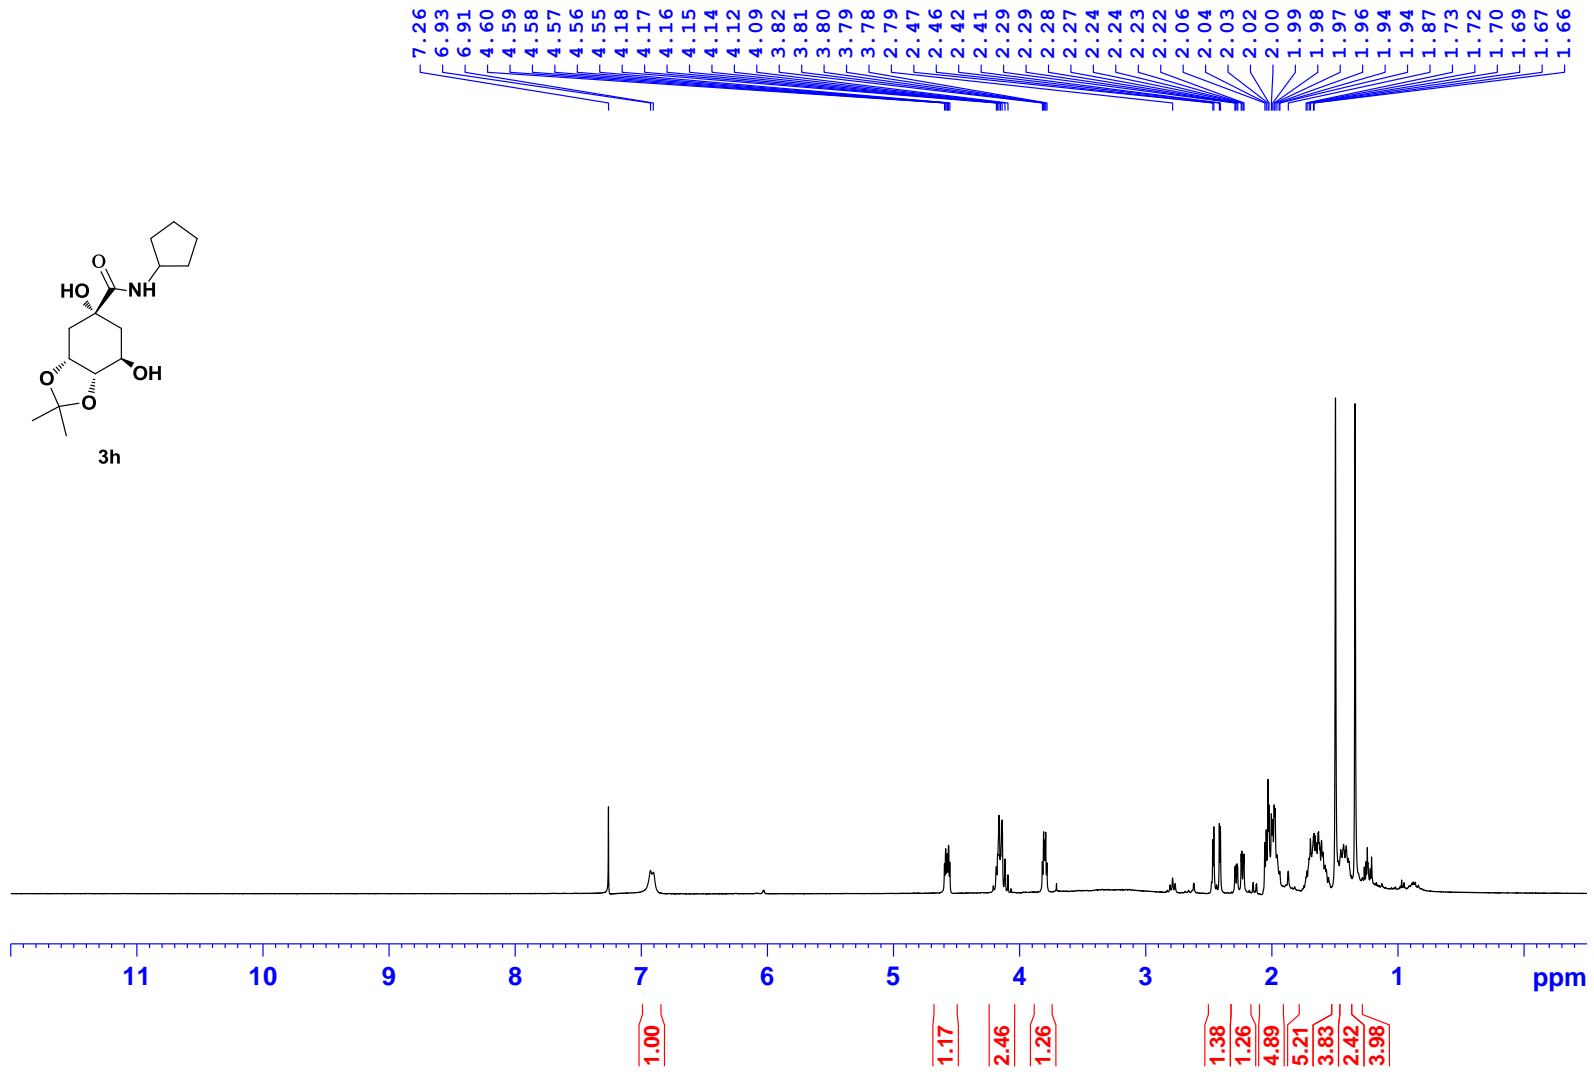

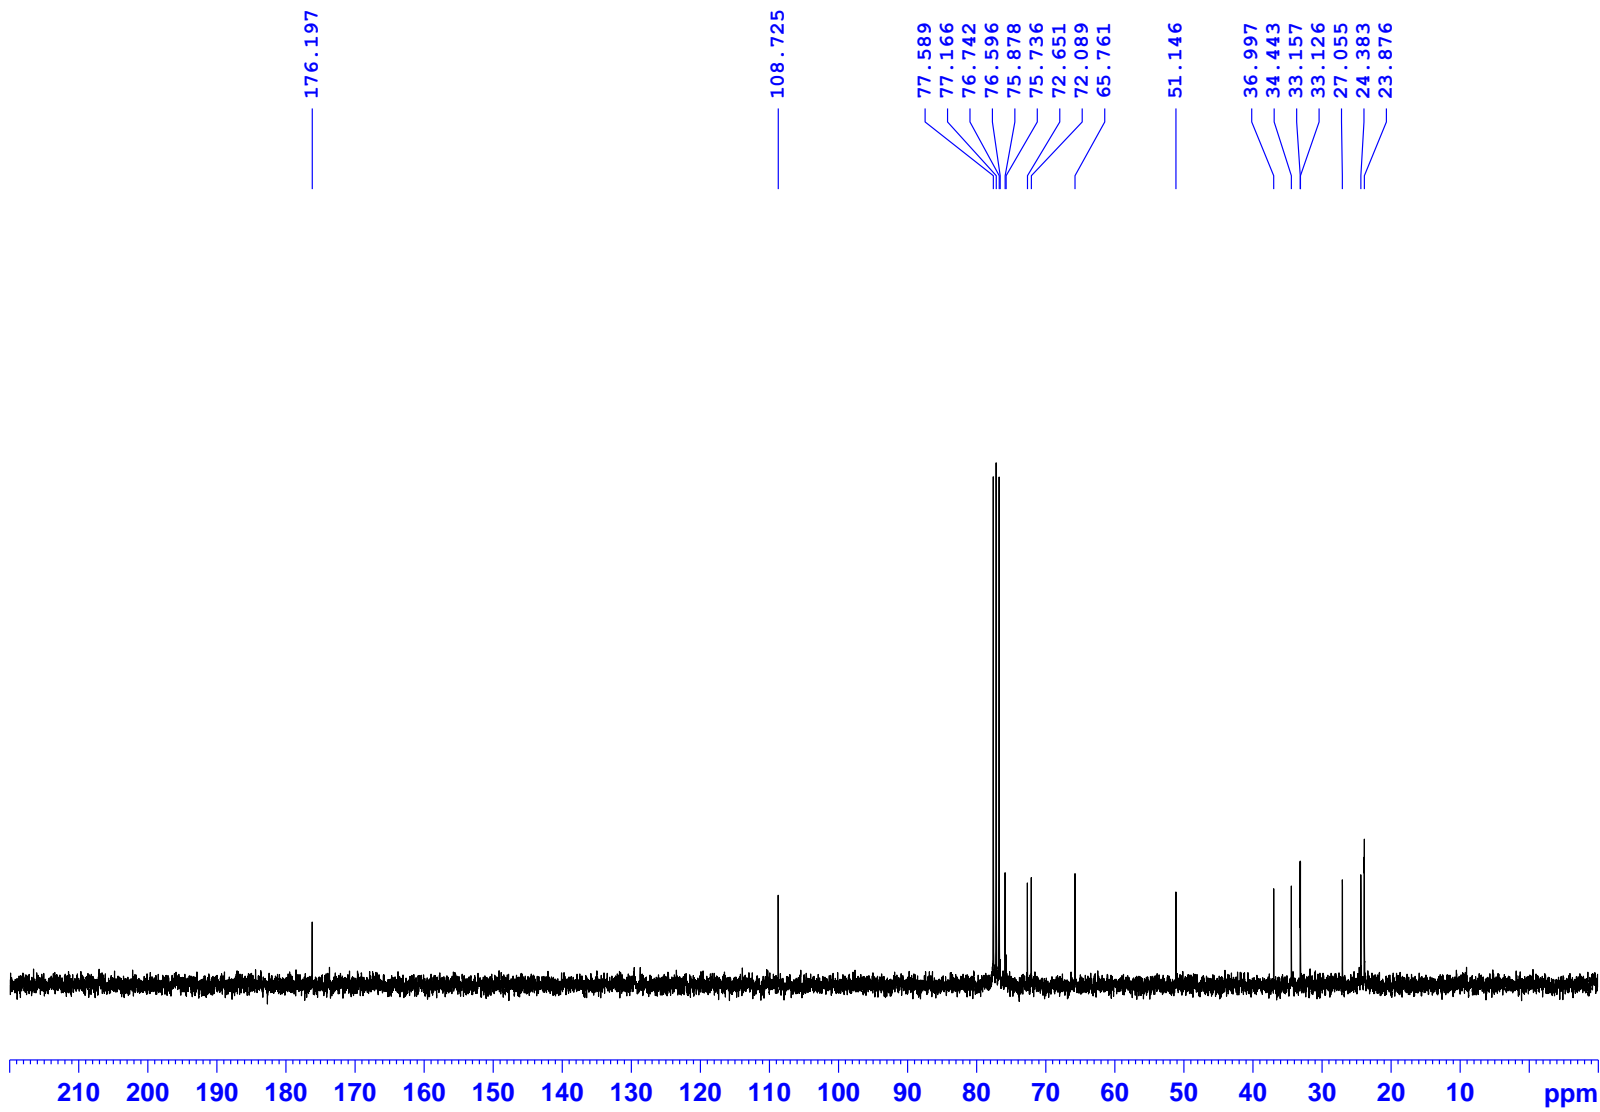

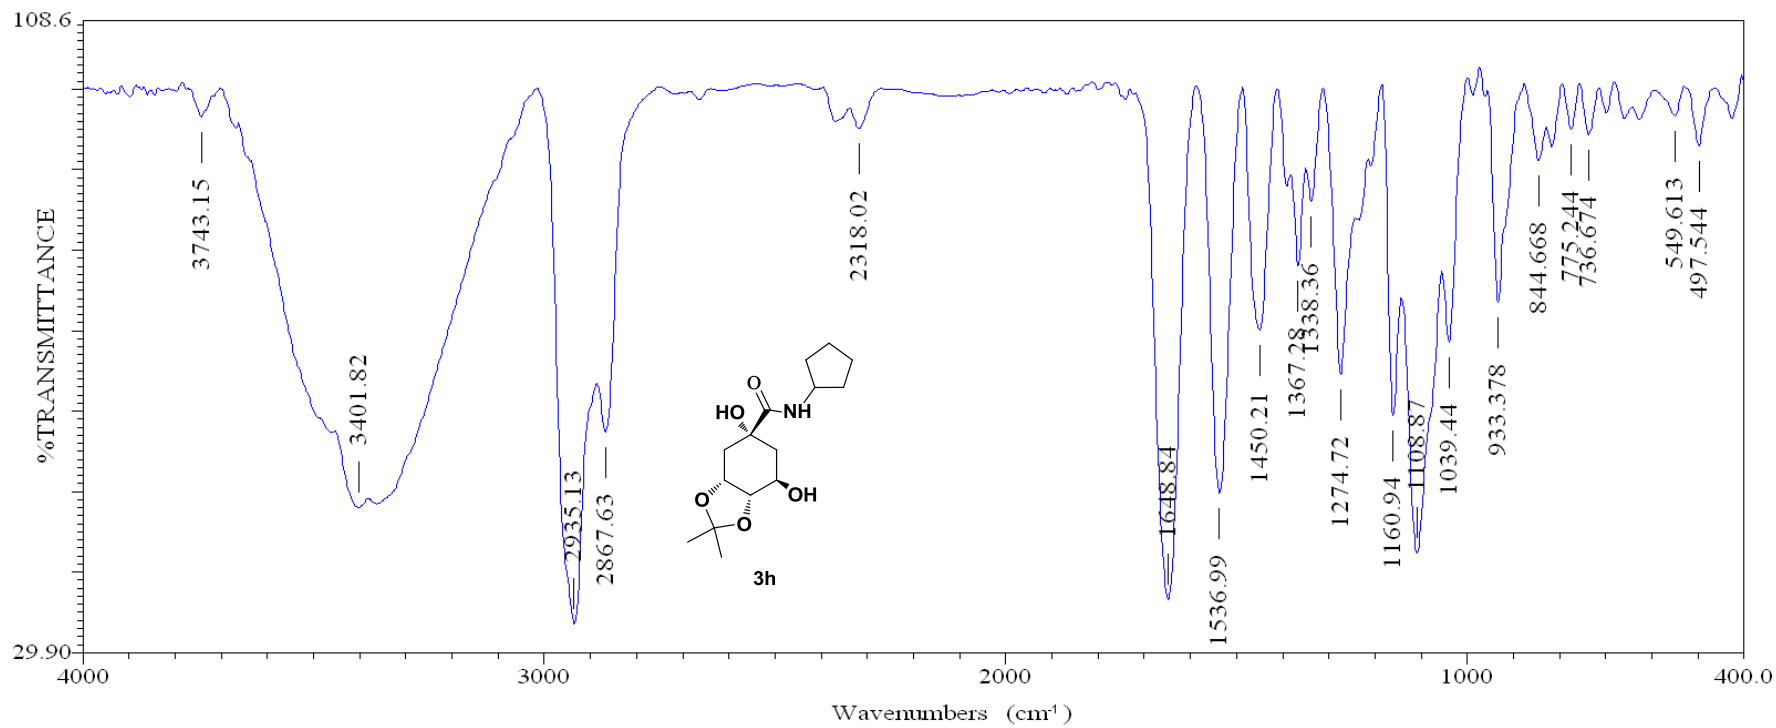

SPEC: lei2830  
Samp: 13211eoutD08  
Mode: EI +VE +LMR BSCAN (EXP) UP LR NRM  
Oper:  
Base: 59.1  
Norm: 59.1  
Peak: 1000.00 mmu  
Data: +/11>23

01-Mar-12 REG : 01:09.7 #9  
Start : 08:27:02 70  
Inlet :  
Masses: 45 > 500  
#peaks: 578

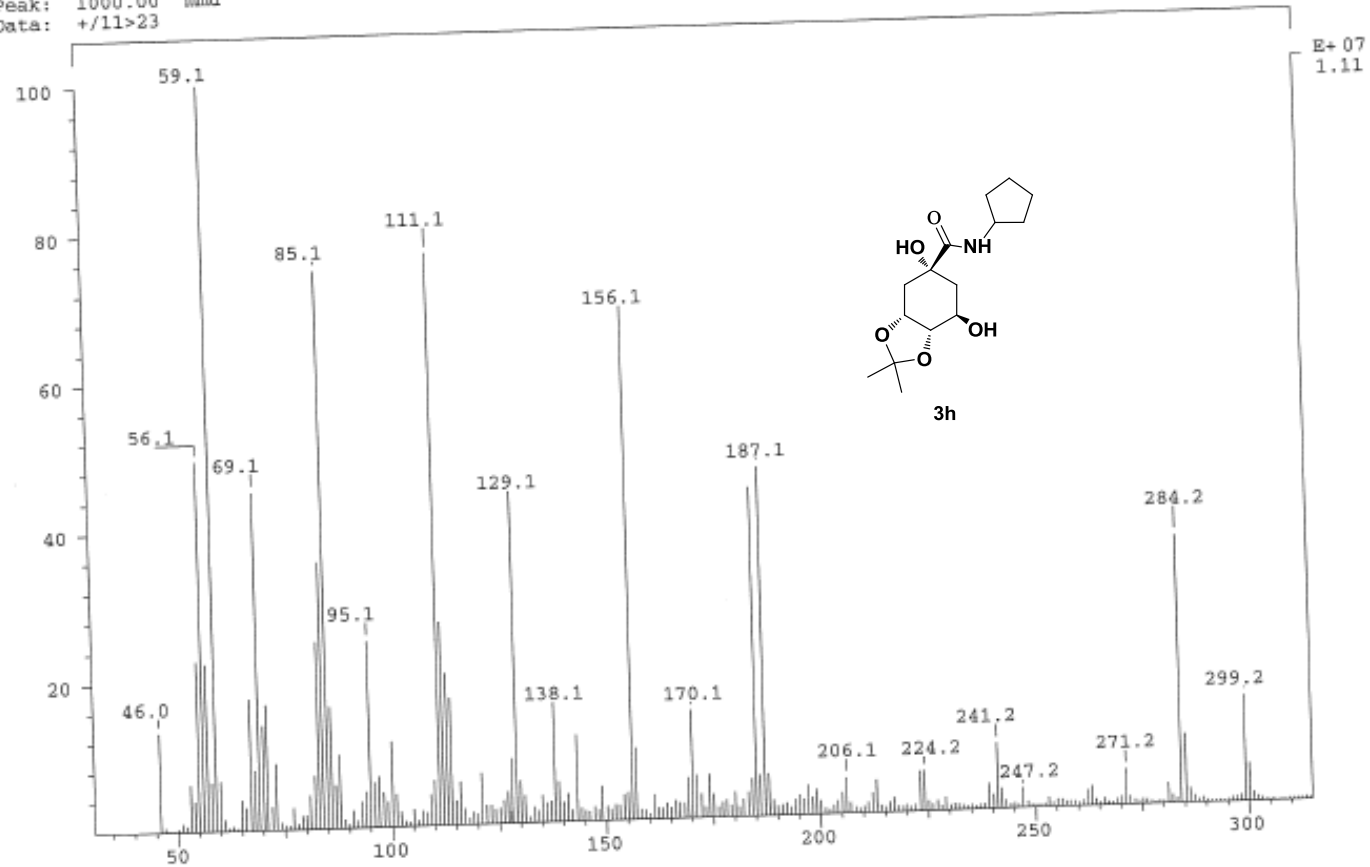

LIST: hei1428-cl 05-Mar-12 REG : 02:10.7 #9  
 Samp: 13211eeutd08 Start : 20:43:59 2166  
 Mode: EI +VE +LMR ESCAN (EXP) UP HR NRM Inlet :  
 Oper:  
 Limt: ( 0)  
 : (435) C25.H25.N.O5  
 Peak: 1000.00 mmu R+D: -2.0 > 60.0  
 Data: +/402>681 (CMASS : converted |CMASS : converted |CMASS : conve

| Mass     | Intensity | %RA    | Flags | Delta (mmu) | R+D | Composition  |
|----------|-----------|--------|-------|-------------|-----|--------------|
| 299.1735 | 916654    | 100.00 | #     | -0.3        | 4.0 | C15.H25.N.O5 |

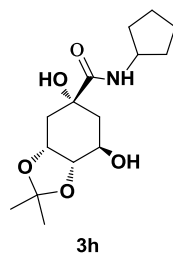

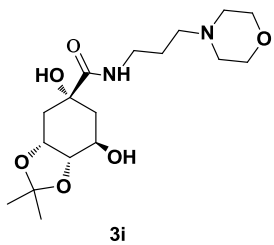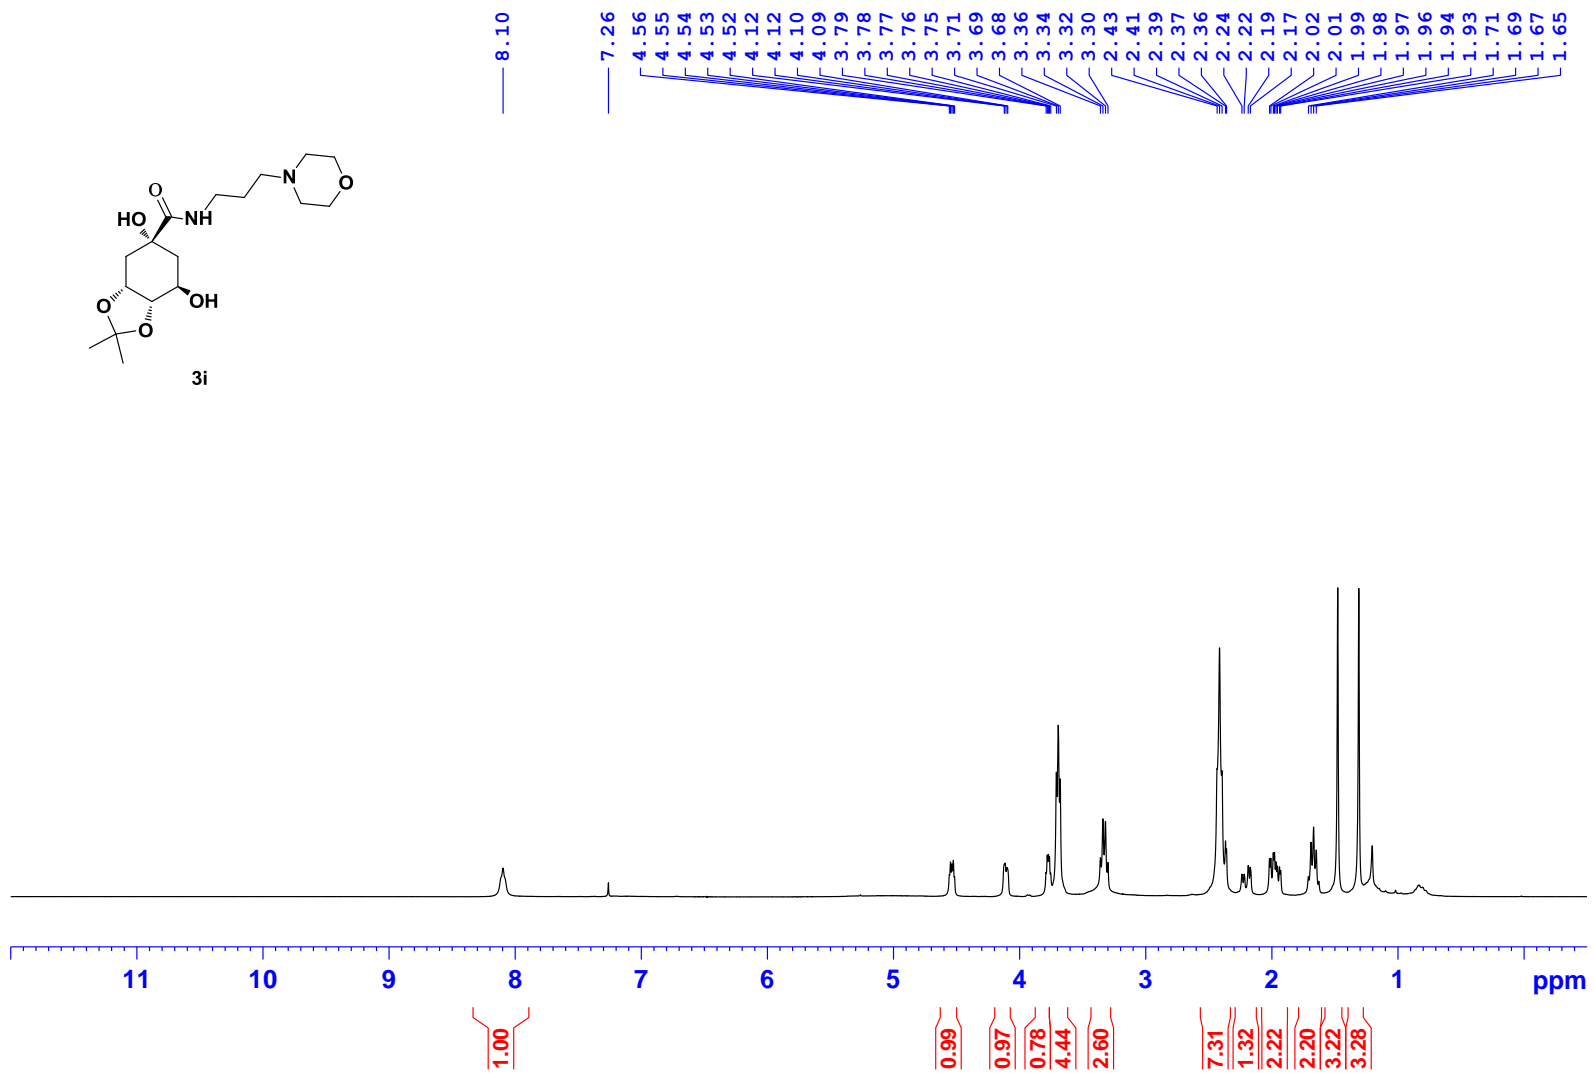

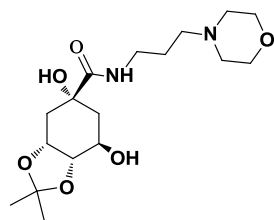

3i

176.504

108.635

77.582

77.158

76.733

76.037

72.823

72.103

66.793

65.795

57.810

53.805

39.310

37.166

34.587

27.103

24.919

24.382

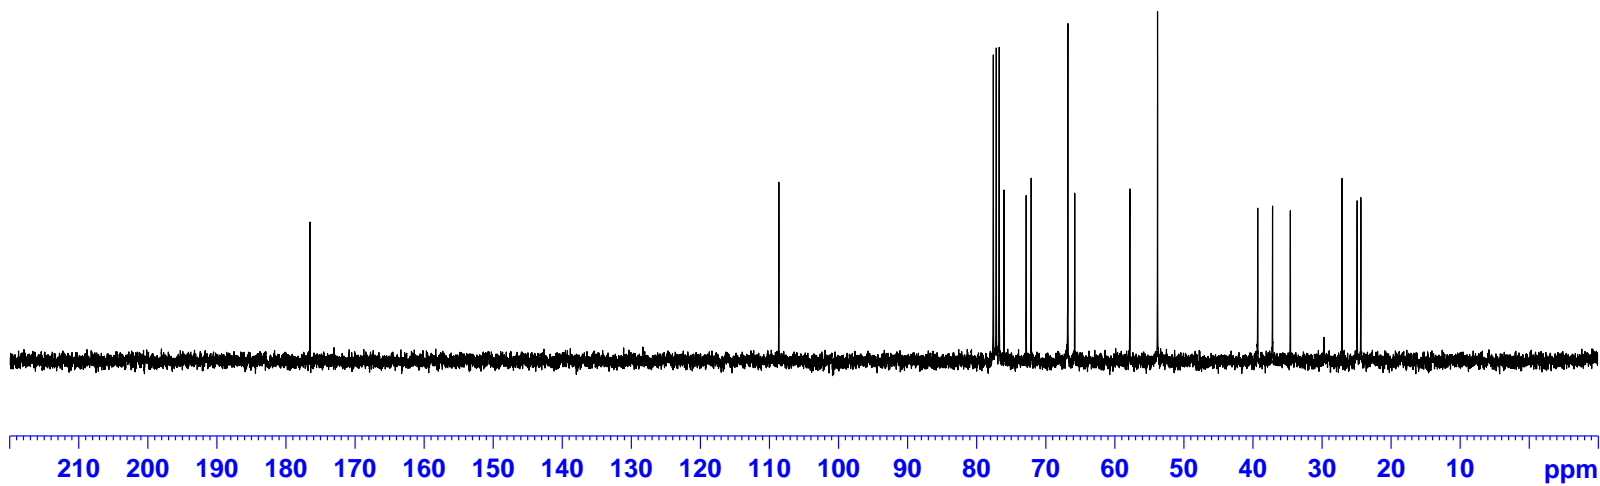

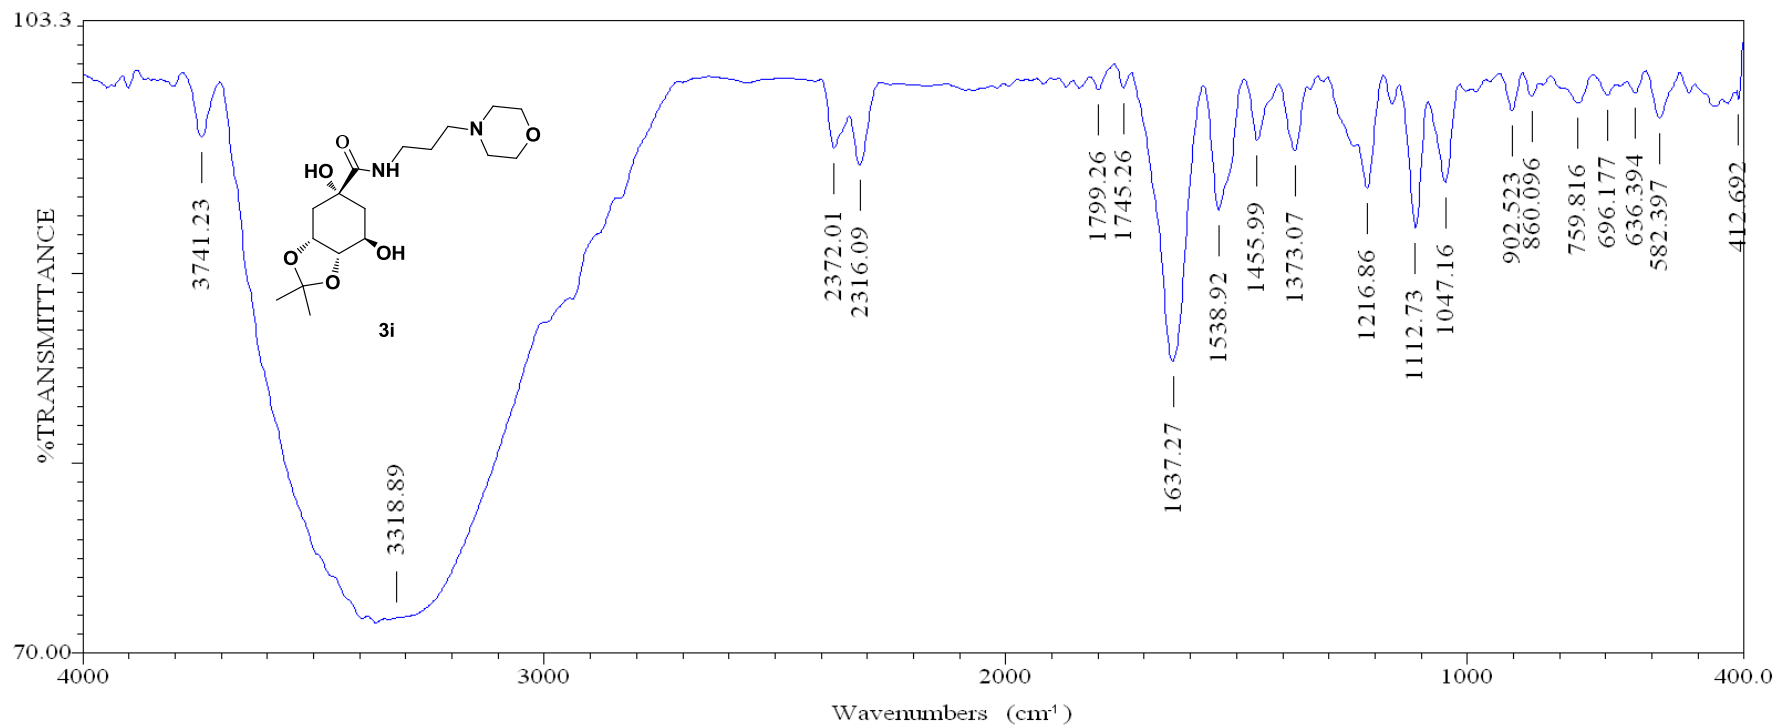



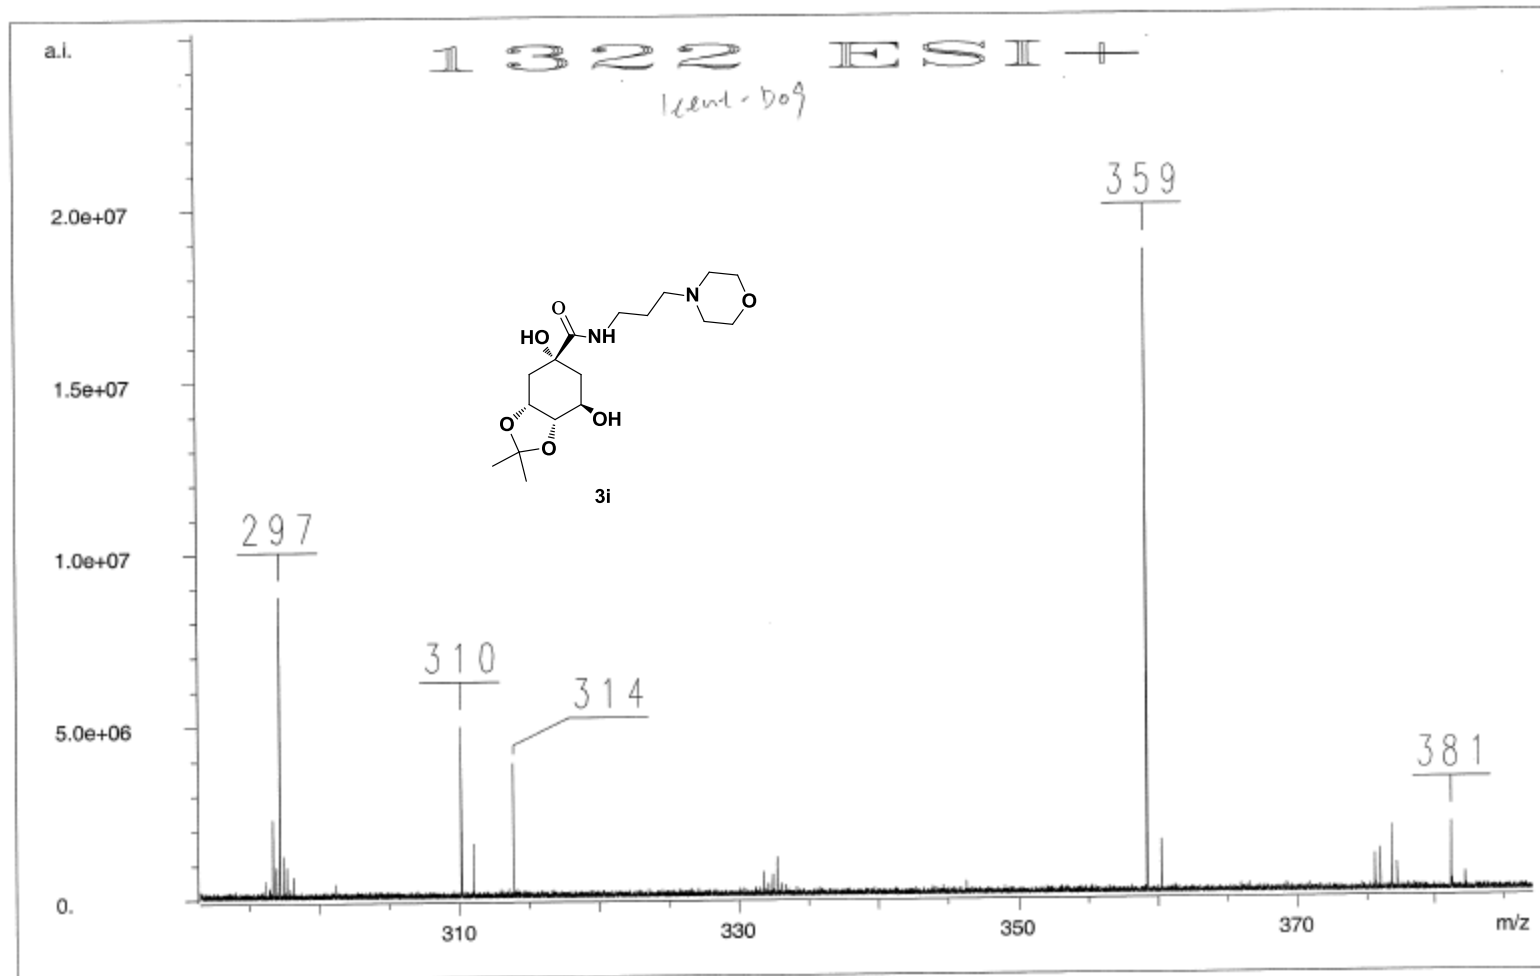

1322 ESI+  
Molecular Formula : C<sub>17</sub>H<sub>31</sub>N<sub>2</sub>O<sub>6</sub>  
Exact Mass :359.2182  
Measured Mass :359.2184

359.2184

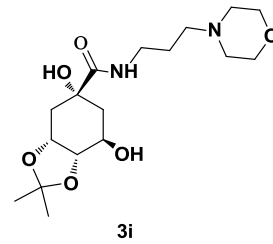

359.10 359.20 359.30 m/z

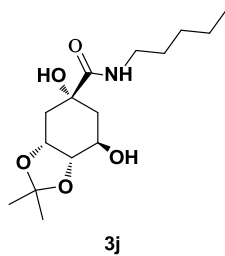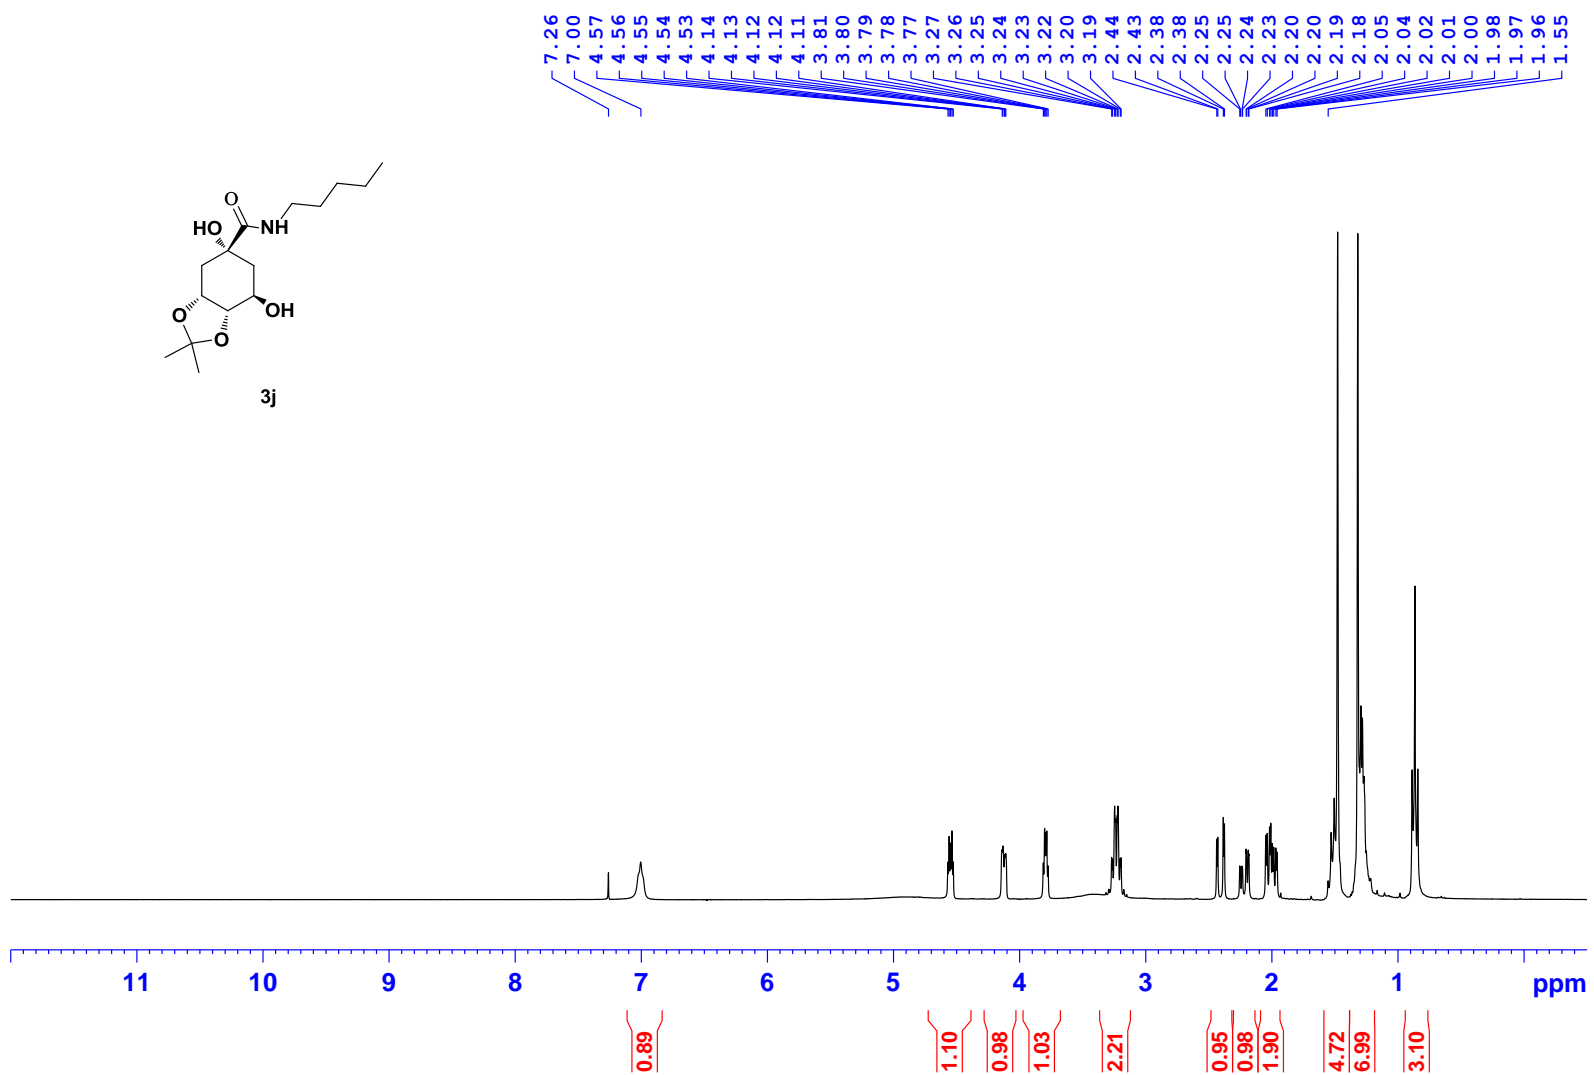

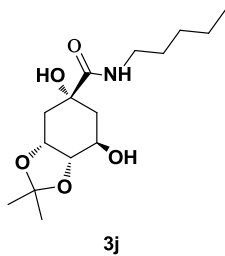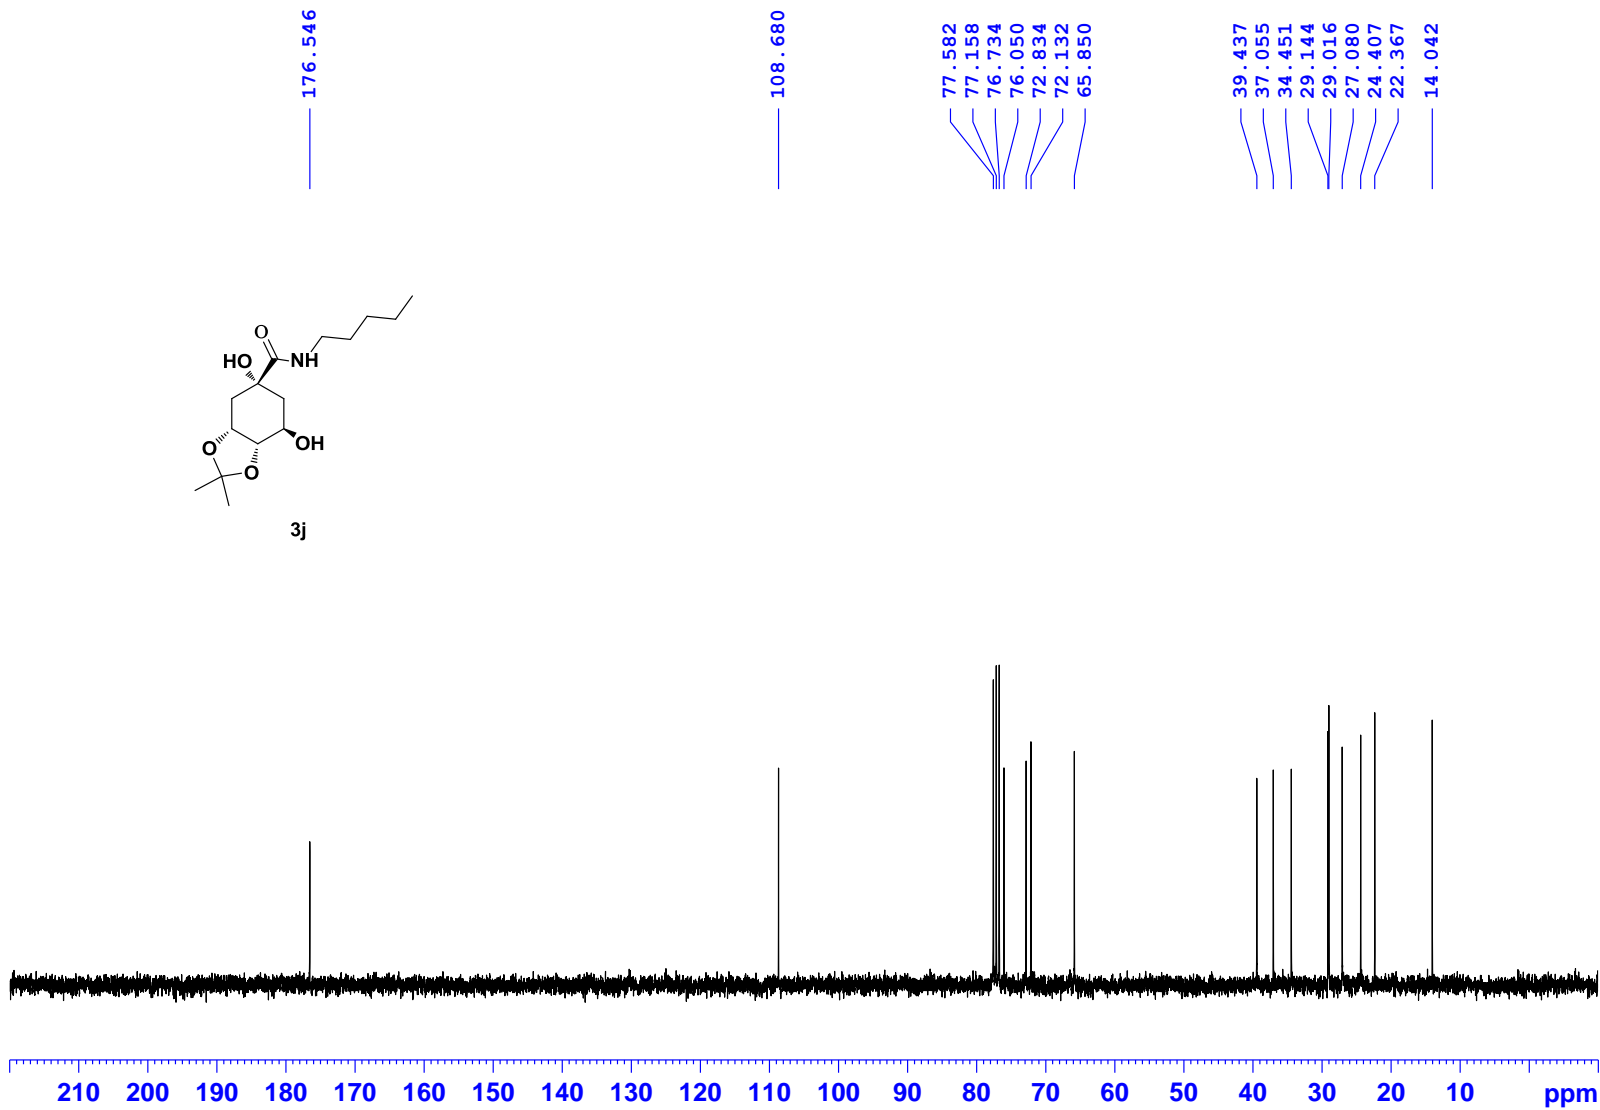

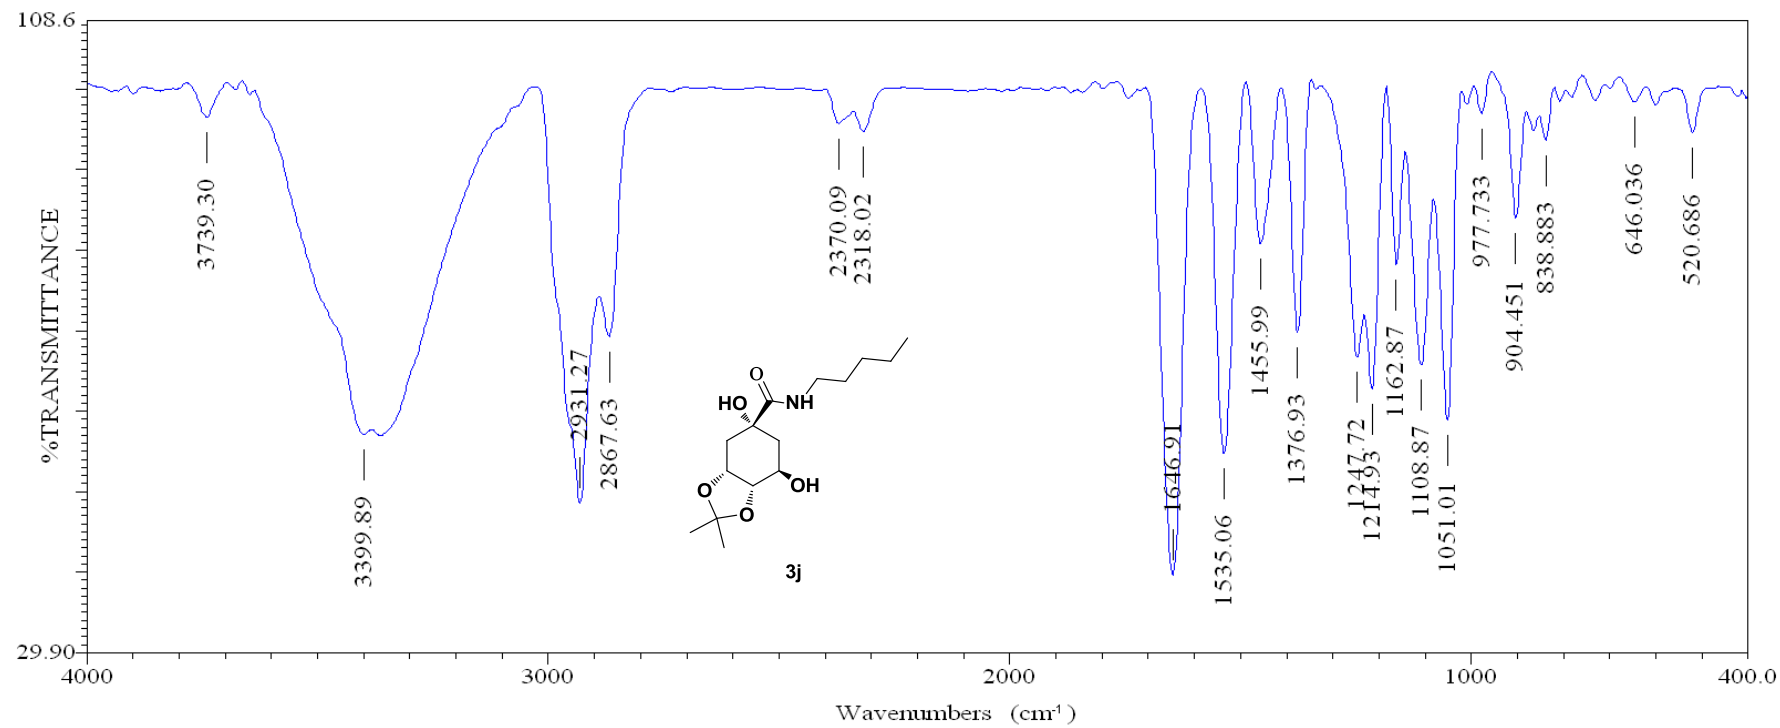

SPEC: lei2846  
Samp: 13231eeutD10  
Mode: EI +VE +LMR BSCAN (EXP) UP LR NRM  
Oper:  
Base: 59.1 Inten : 14741448 Inlet :  
Norm: 59.1 RIC : 149894209 Masses: 45 > 400  
Peak: 1000.00 mmu #peaks: 431  
Data: +/11>25

01-Mar-12

REG : 00:55.2

#9

Start : 16:12:05

102

Inlet :

Masses: 45 > 400

#peaks: 431

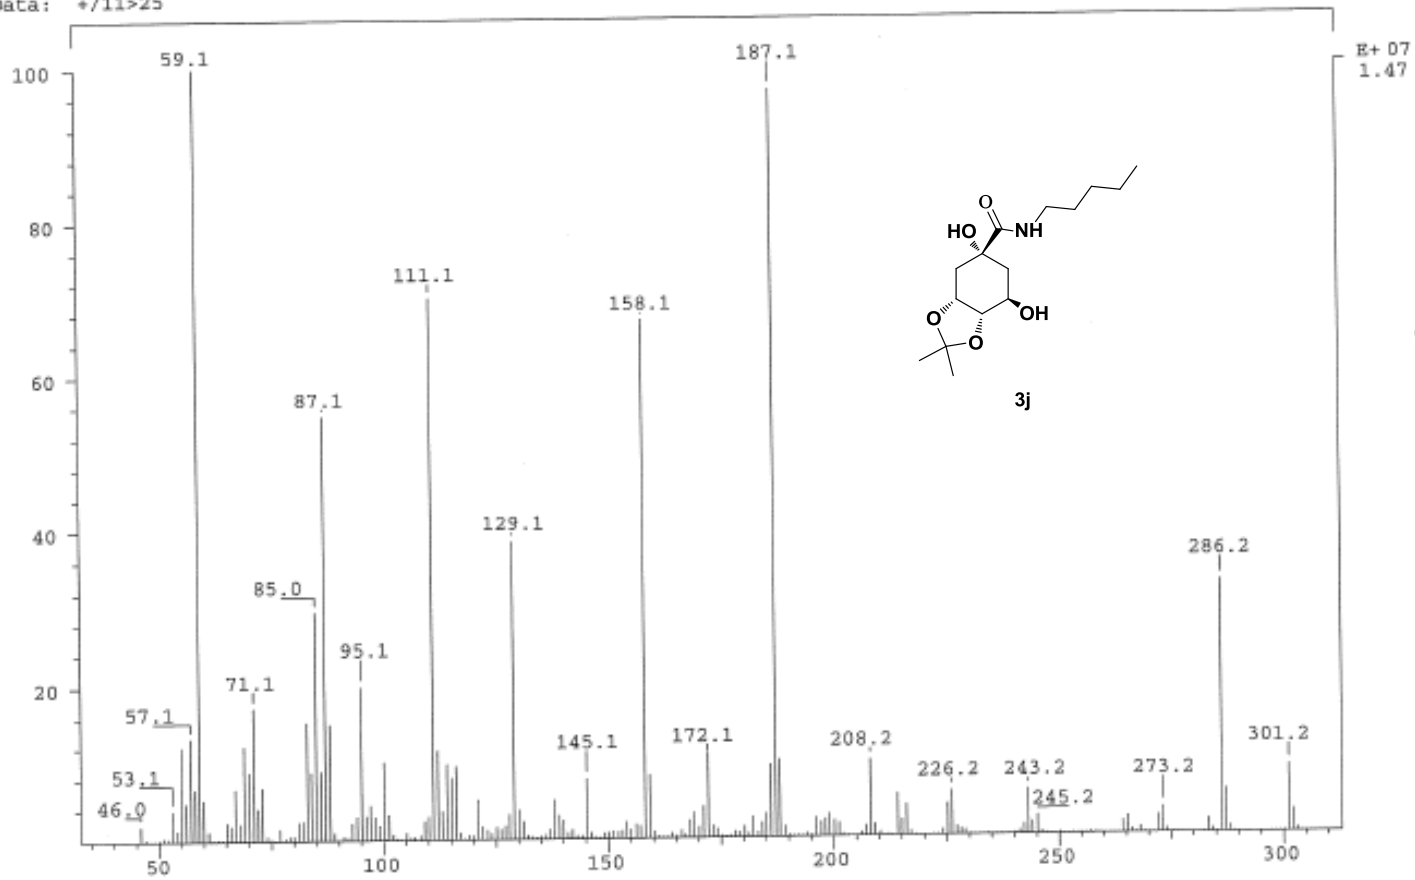

E+ 07  
1.47

LIST: heil424-c2 05-Mar-12 REG : 00:54.6 #9  
 Samp: 13231eeutd10 Start : 19:31:20 814  
 Mode: EI +VE +LMR ESCAN (EXP) UP HR NRM  
 Oper: Inlet :  
 Limt: ( 0)  
 : (371) C19.H33.N.06  
 Peak: 1000.00 mmu R+D: -2.0 > 60.0  
 Data: +/163>287 (CMASS : converted |CMASS : converted |CMASS : conve

| Mass     | Intensity | %RA    | Flags | Delta (mmu) | R+D | Composition  |
|----------|-----------|--------|-------|-------------|-----|--------------|
| 301.1897 | 1013276   | 100.00 | #     | -0.7        | 3.0 | C15.H27.N.05 |

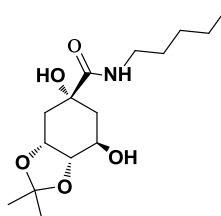

3j

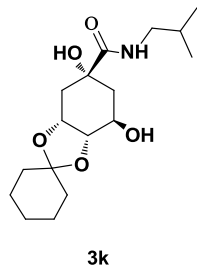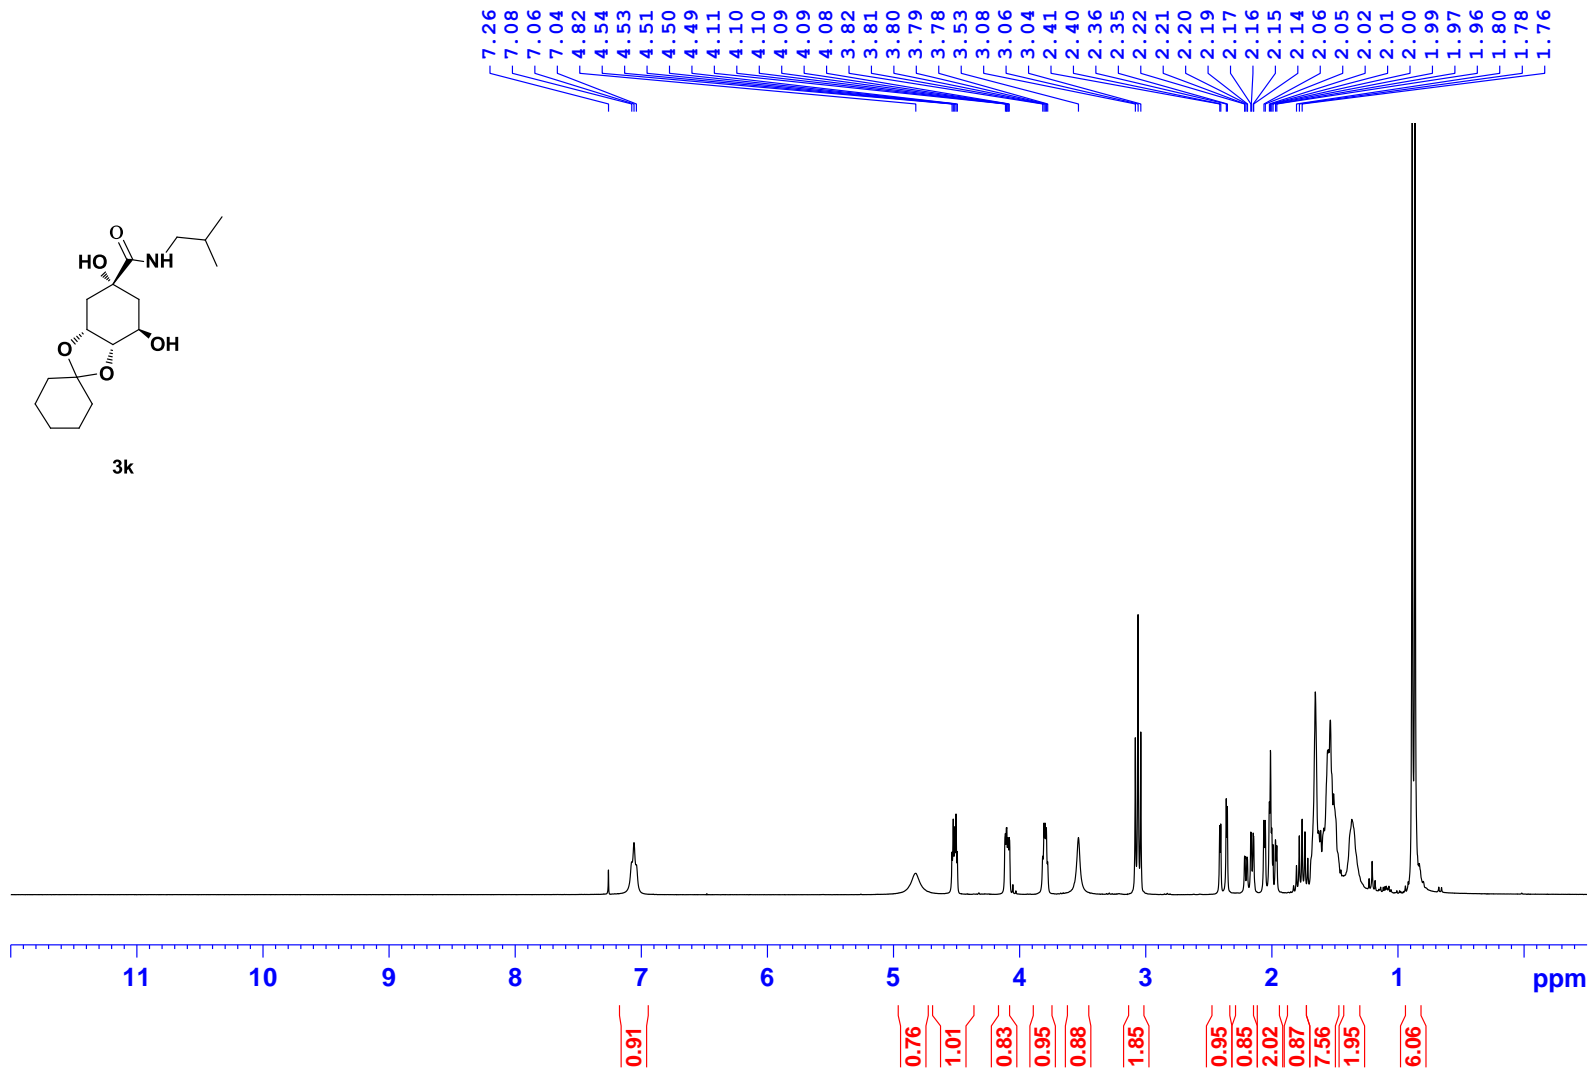



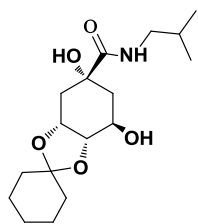

3k

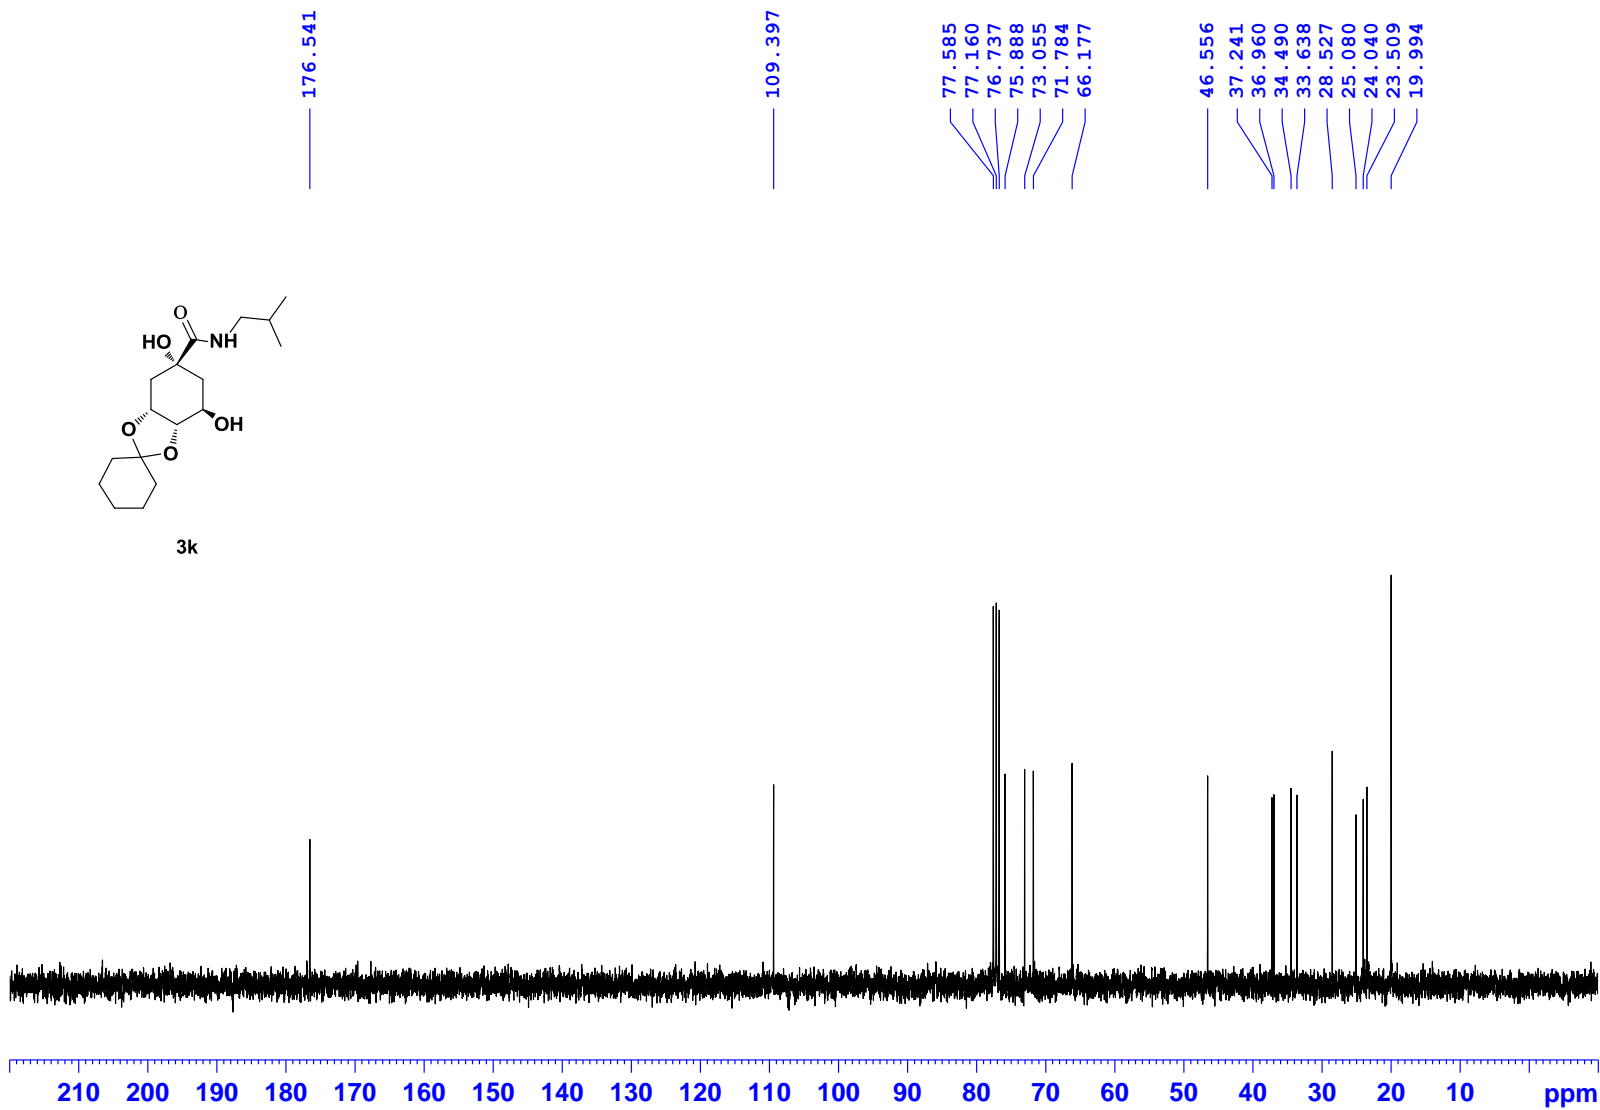

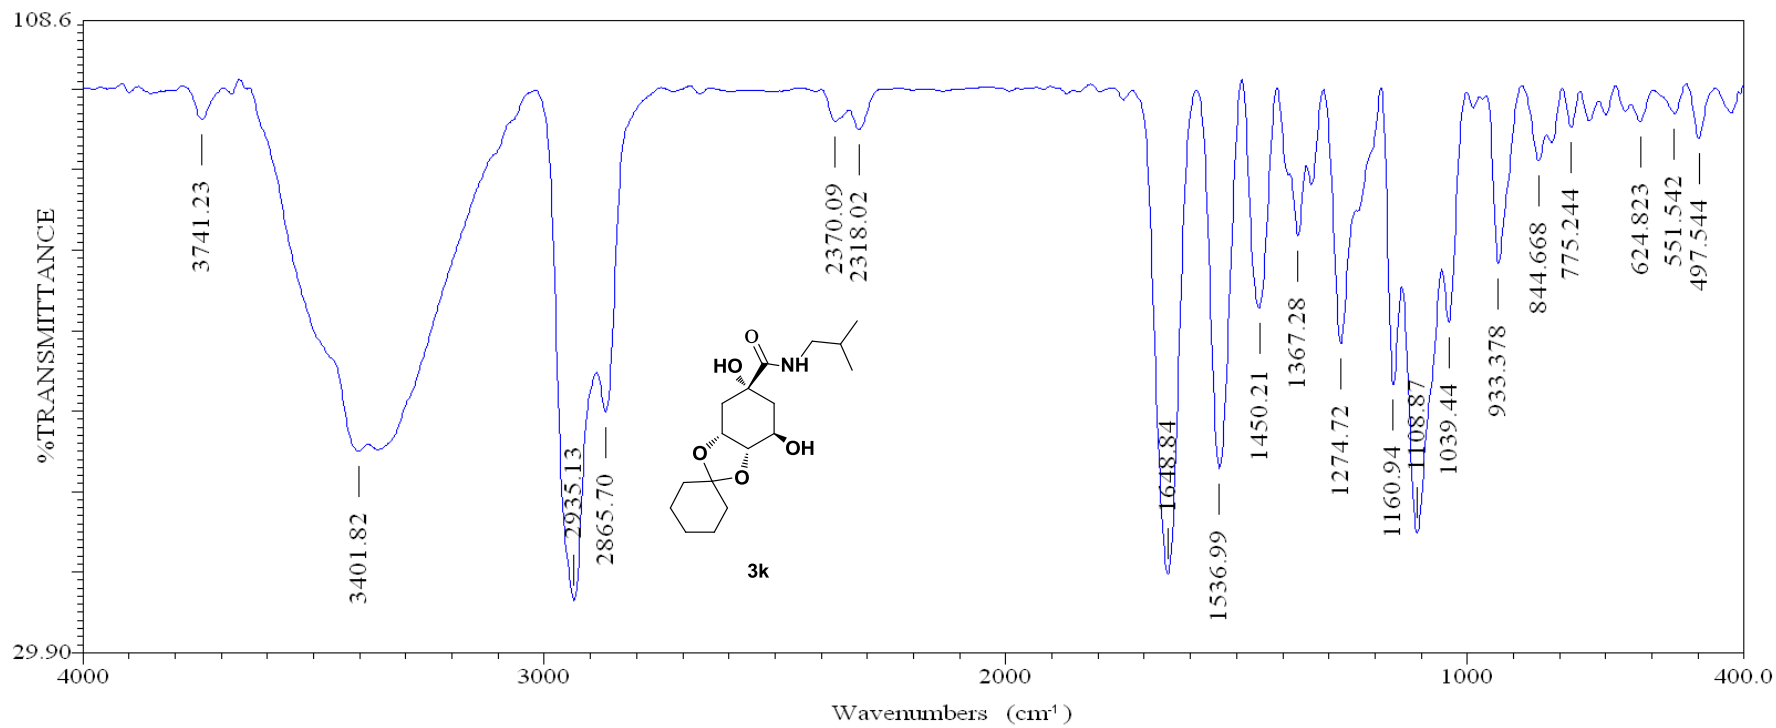

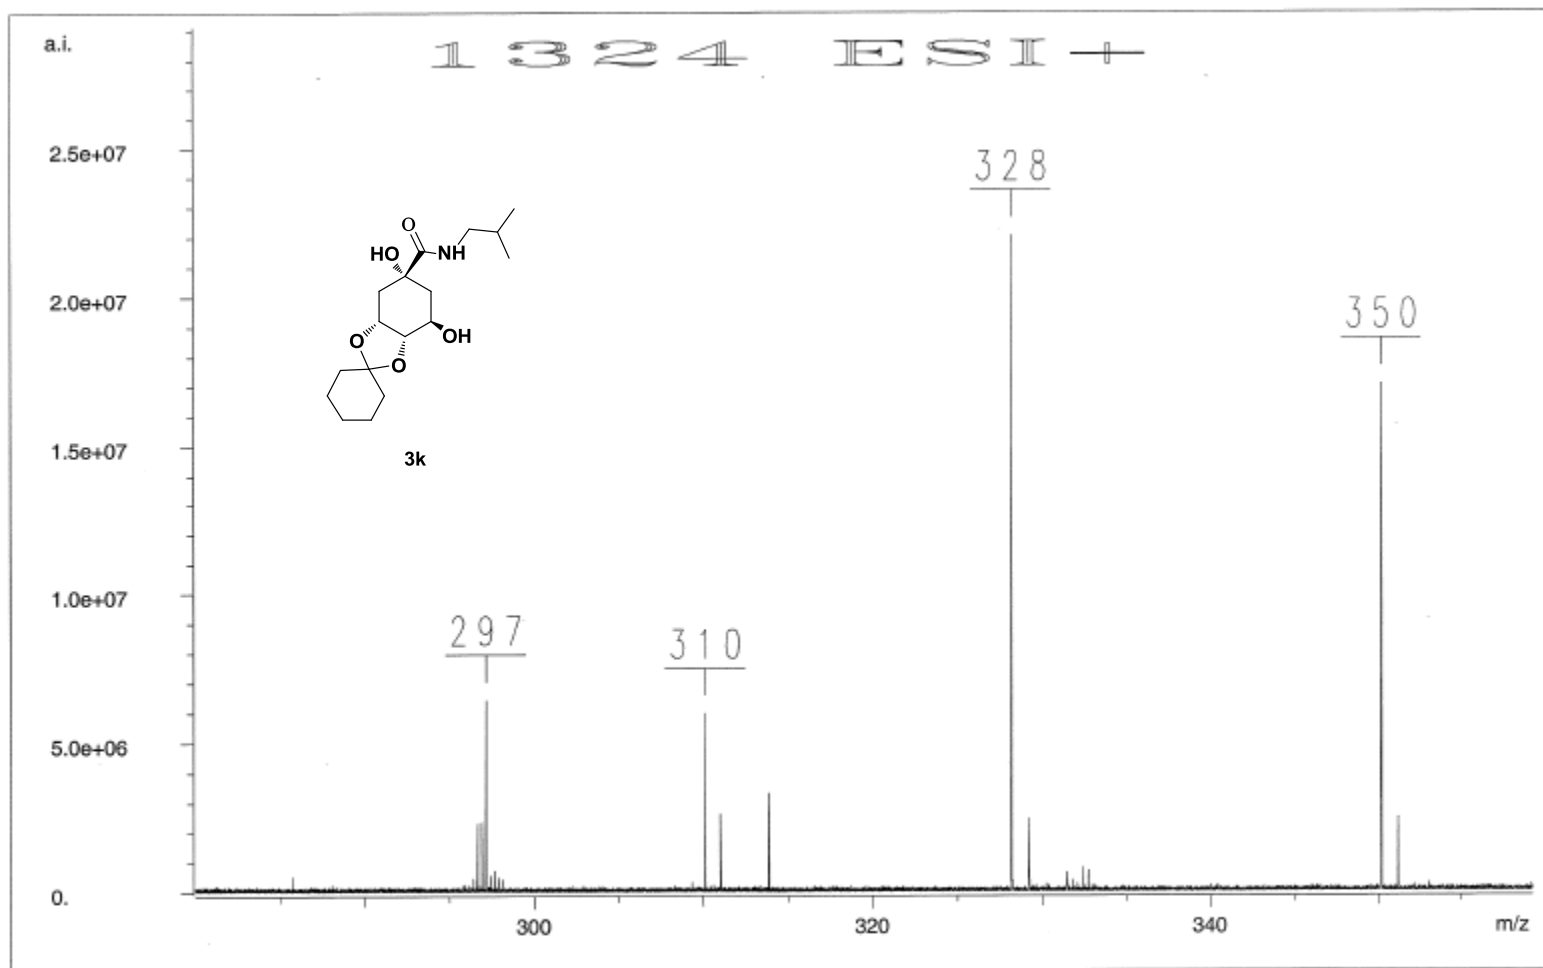

1324 ESI+  
Molecular Formula : C<sub>17</sub>H<sub>30</sub>N<sub>0</sub>O<sub>5</sub>  
Exact Mass : 328.2124  
Measured Mass : 328.2126

328.2126

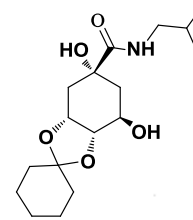

3k

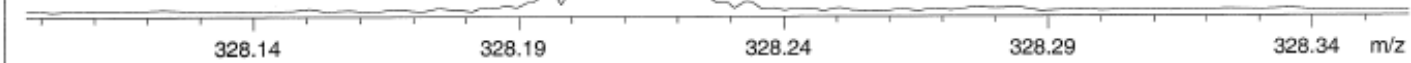

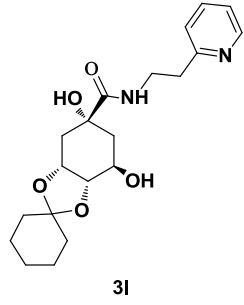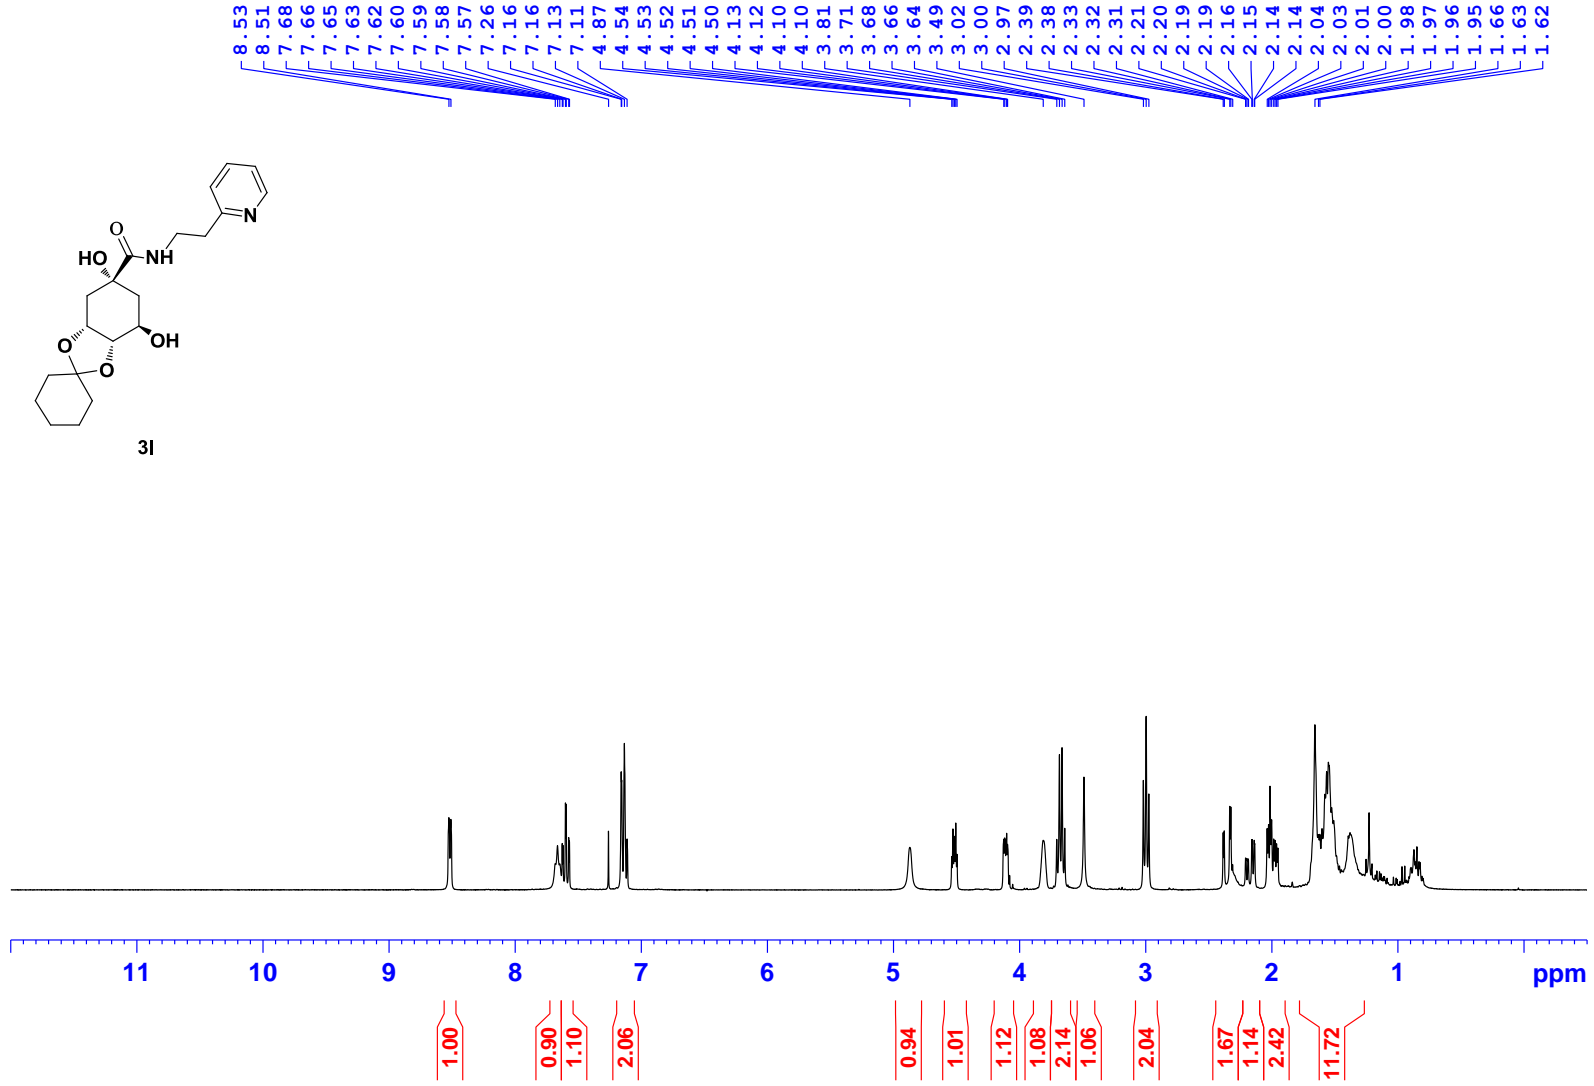

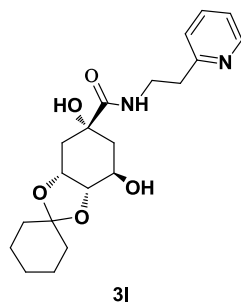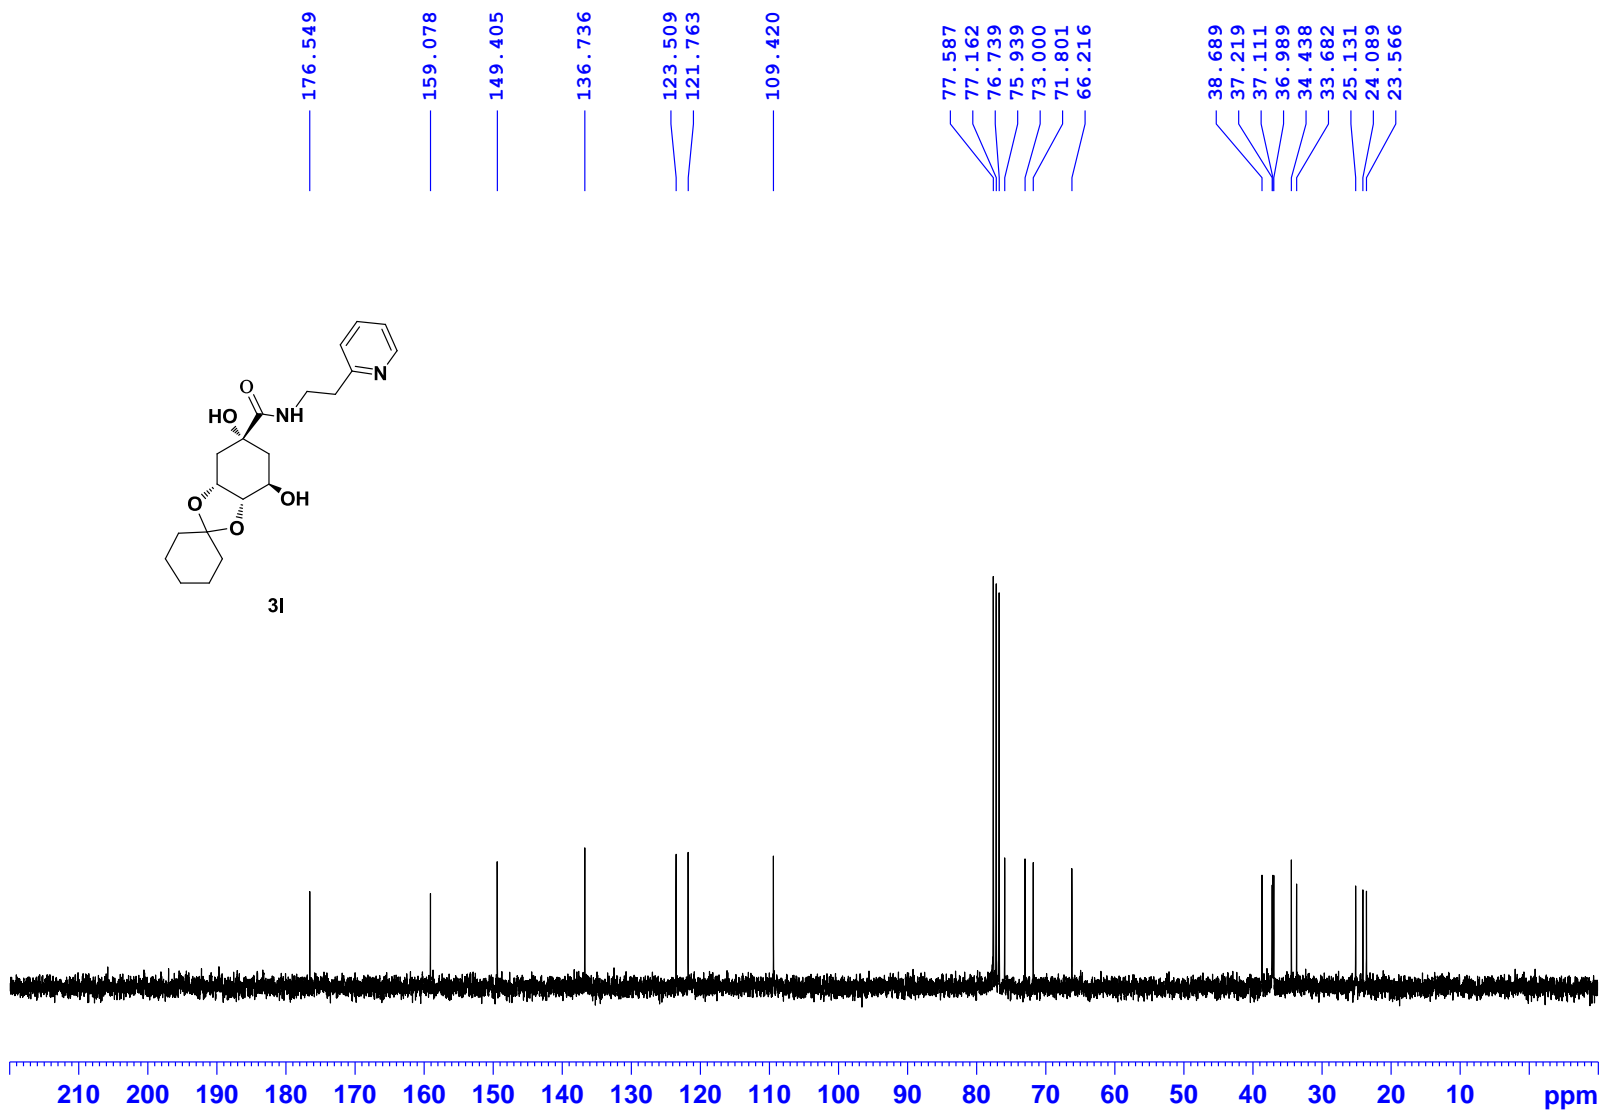

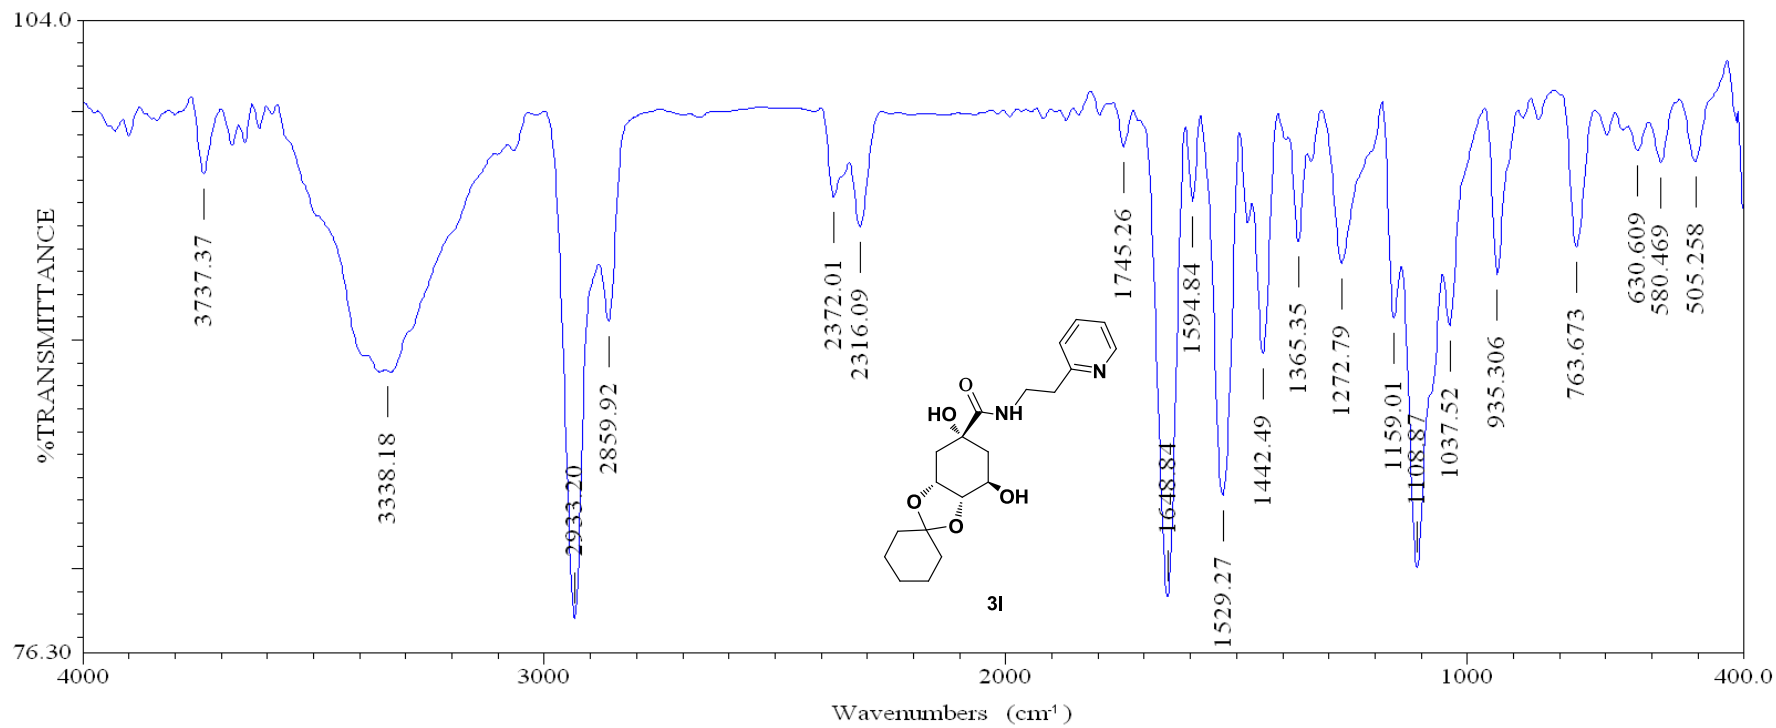

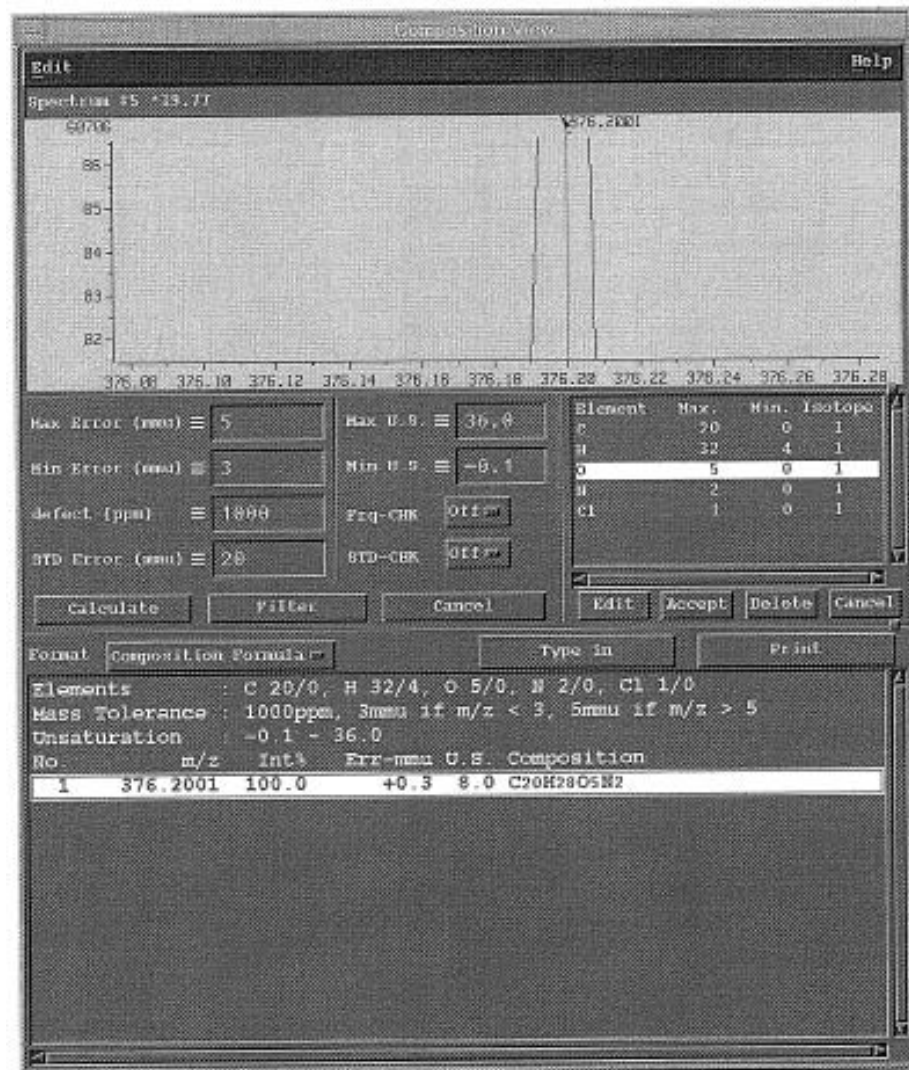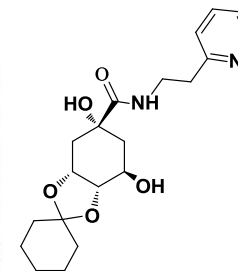

31



[ Elemental Composition ]

Page: 1

Data : 201105148  
Sample: leeut D-12  
Note : -

Date : 31-May-2011 17:22

Inlet : Direct

Ion Mode : EI+

RT : 0.40 min

Scan#: 17

Elements : C 20/0, H 32/4, O 5/0, N 2/0, Cl 1/0

Mass Tolerance : 1000ppm, 3mmu if m/z < 3, 5mmu if m/z > 5

Unsaturation (U.S.) : -0.1 - 36.0

| Observed m/z | Int%  | Err [ppm / mmu] | U.S. | Composition       |
|--------------|-------|-----------------|------|-------------------|
| 376.2001     | 100.0 | +0.8 / +0.3     | 8.0  | C 20 H 28 O 5 N 2 |

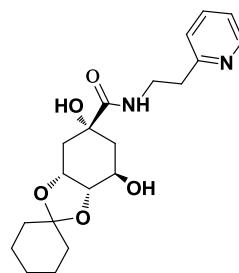

3I

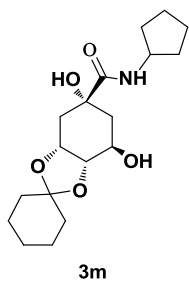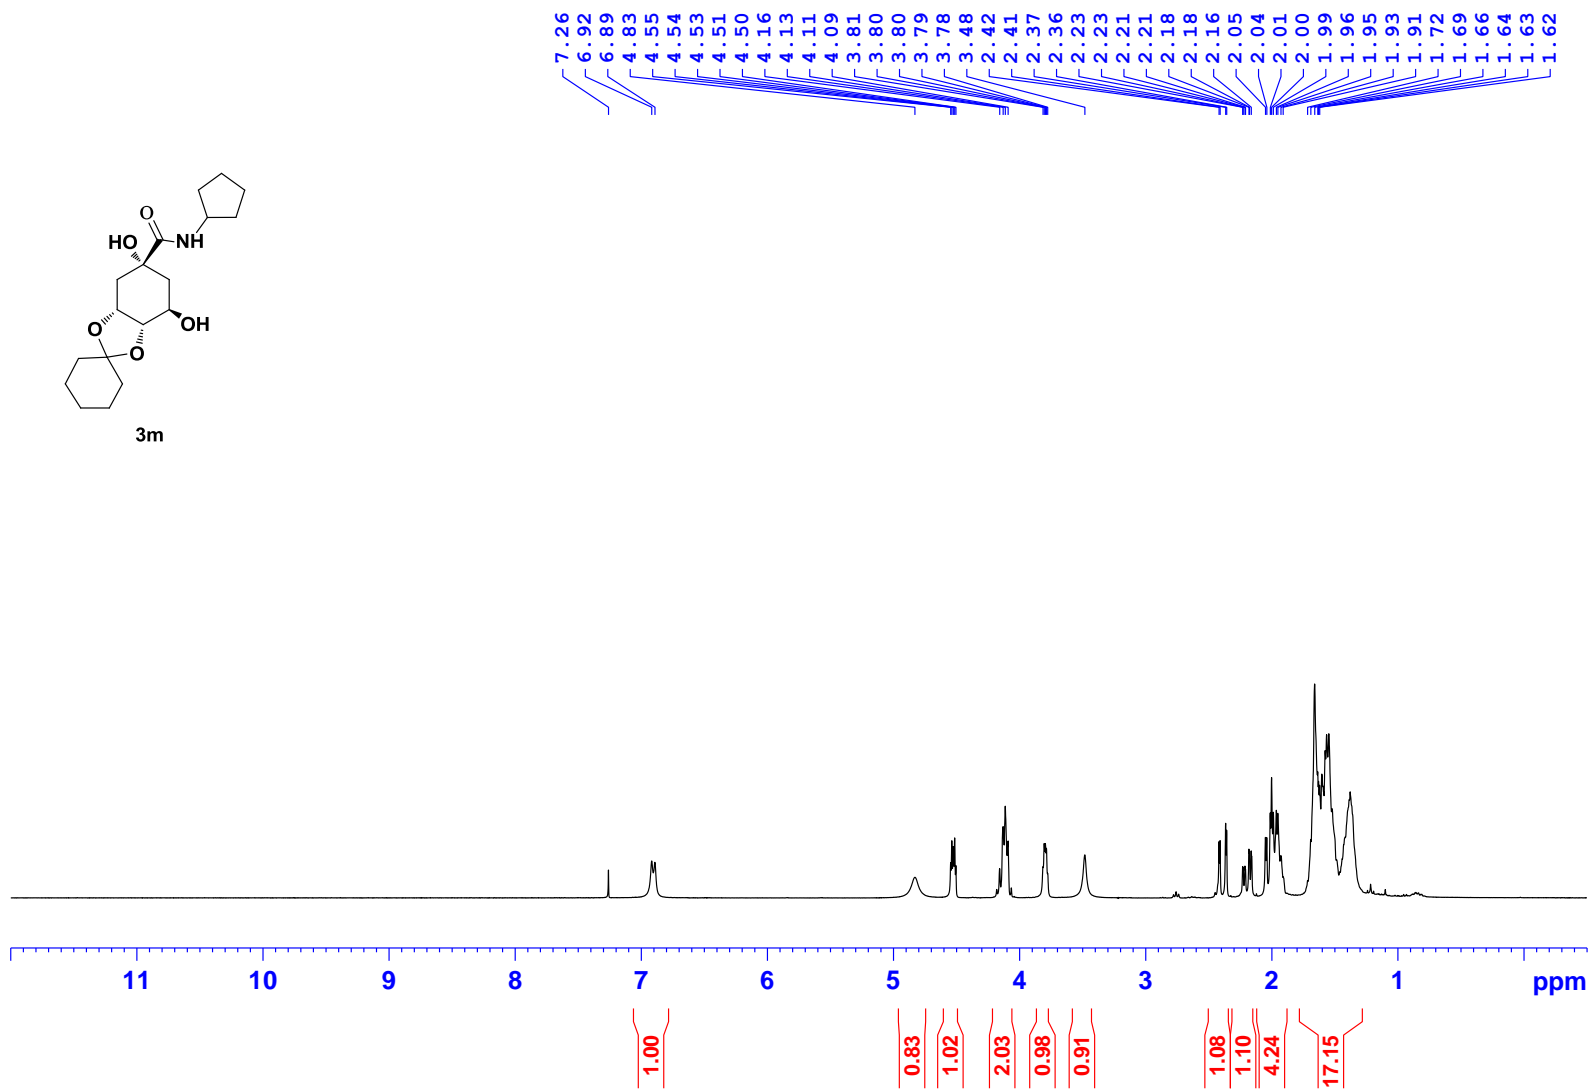

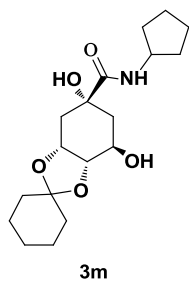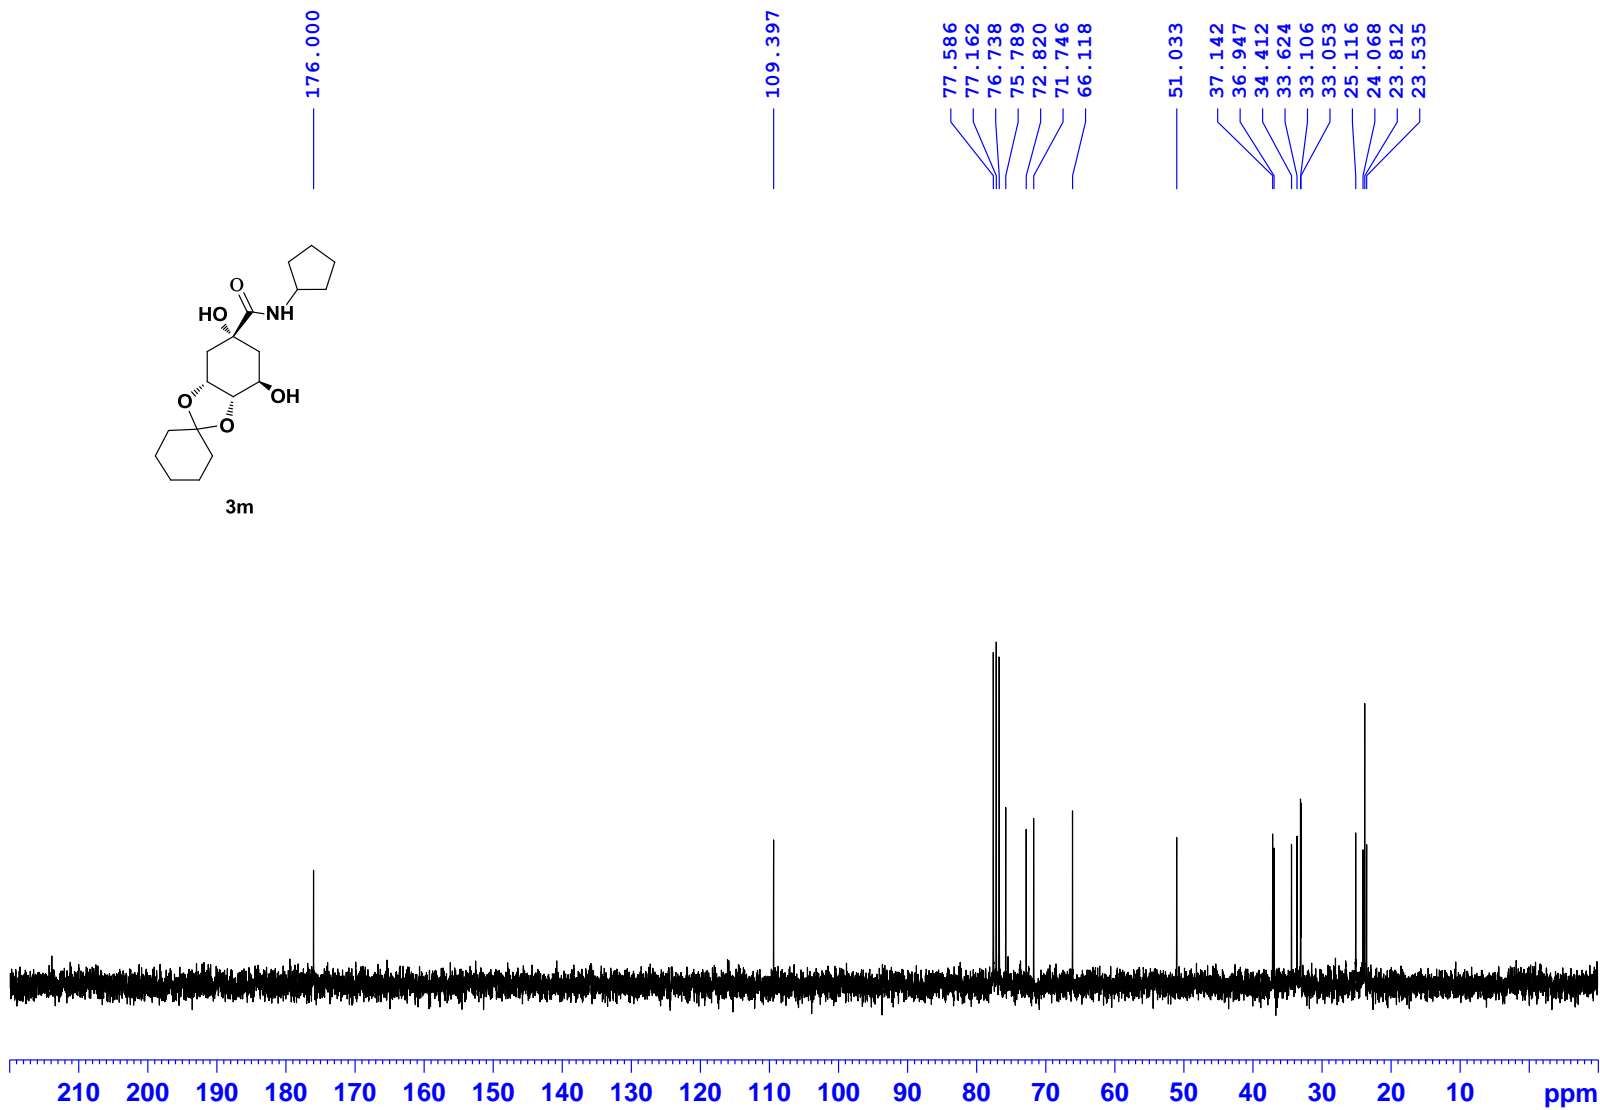

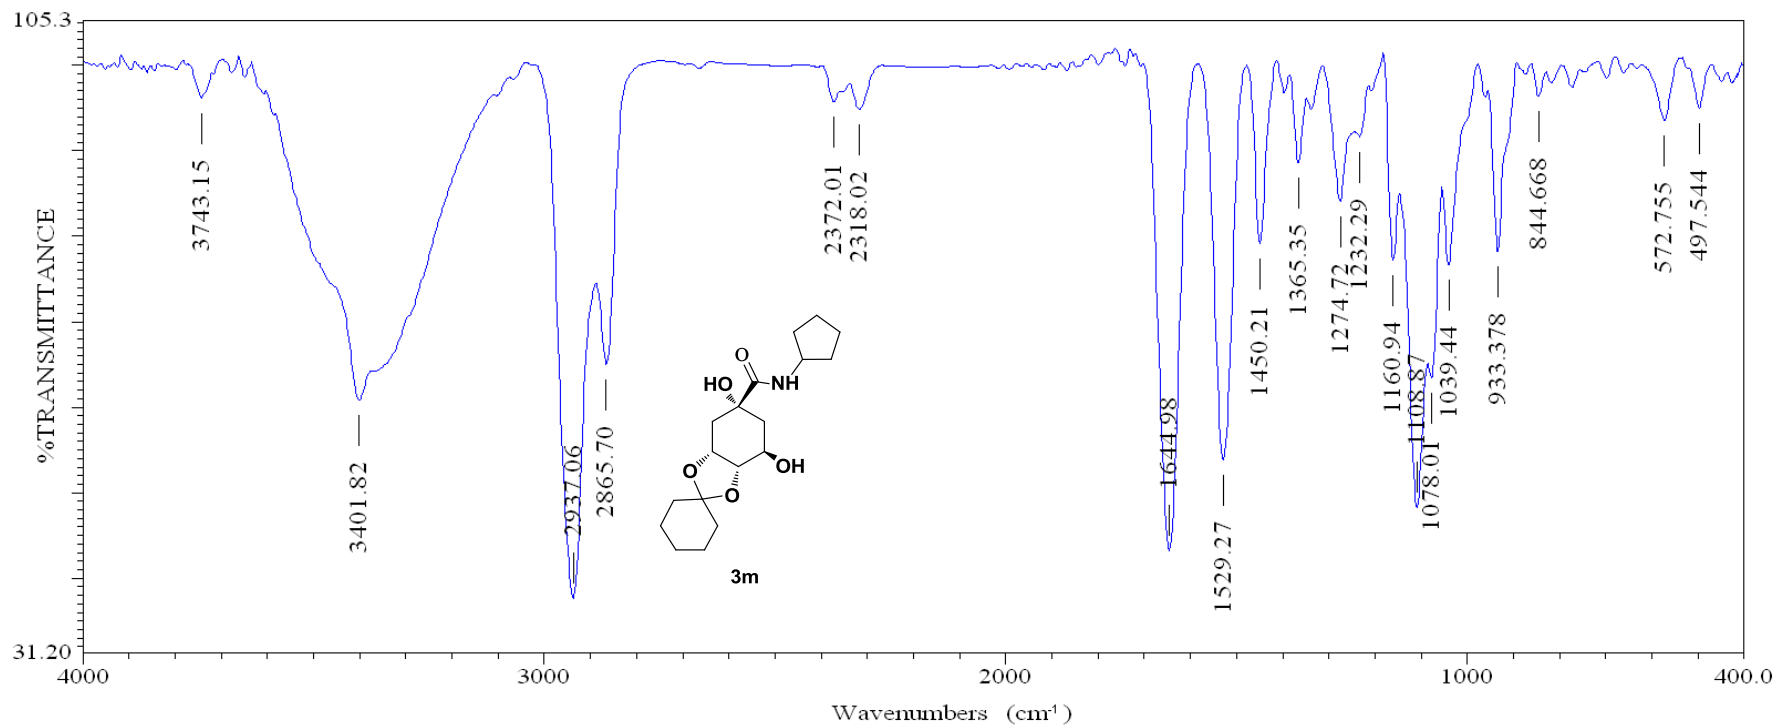

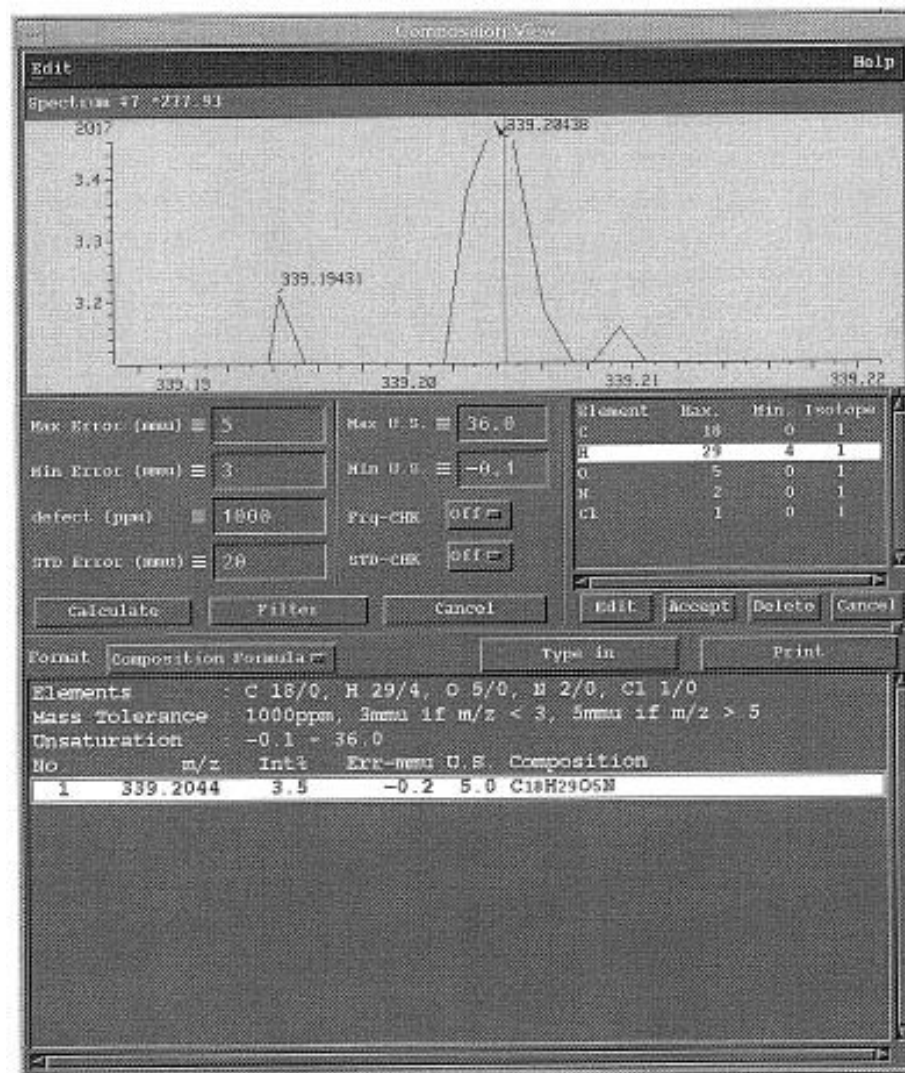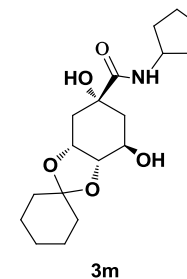

[ Elemental Composition ]

Data : 201105150

Sample: leeut D-13

Note : -

Inlet : Direct

RT : 0.77 min

Elements : C 18/0, H 29/4, O 5/0, N 2/0, Cl 1/0

Mass Tolerance : 1000ppm, 3mmu if m/z < 3, 5mmu if m/z > 5

Unsaturation (U.S.) : -0.1 - 36.0

Date : 31-May-2011 17:29

Page: 1

Ion Mode : EI+

Scan#: 29

| Observed m/z | Int% | Err[ppm / mmu] | U.S. | Composition     |
|--------------|------|----------------|------|-----------------|
| 339.2044     | 3.5  | -0.6 / -0.2    | 5.0  | C 18 H 29 O 5 N |

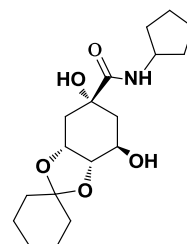

3m

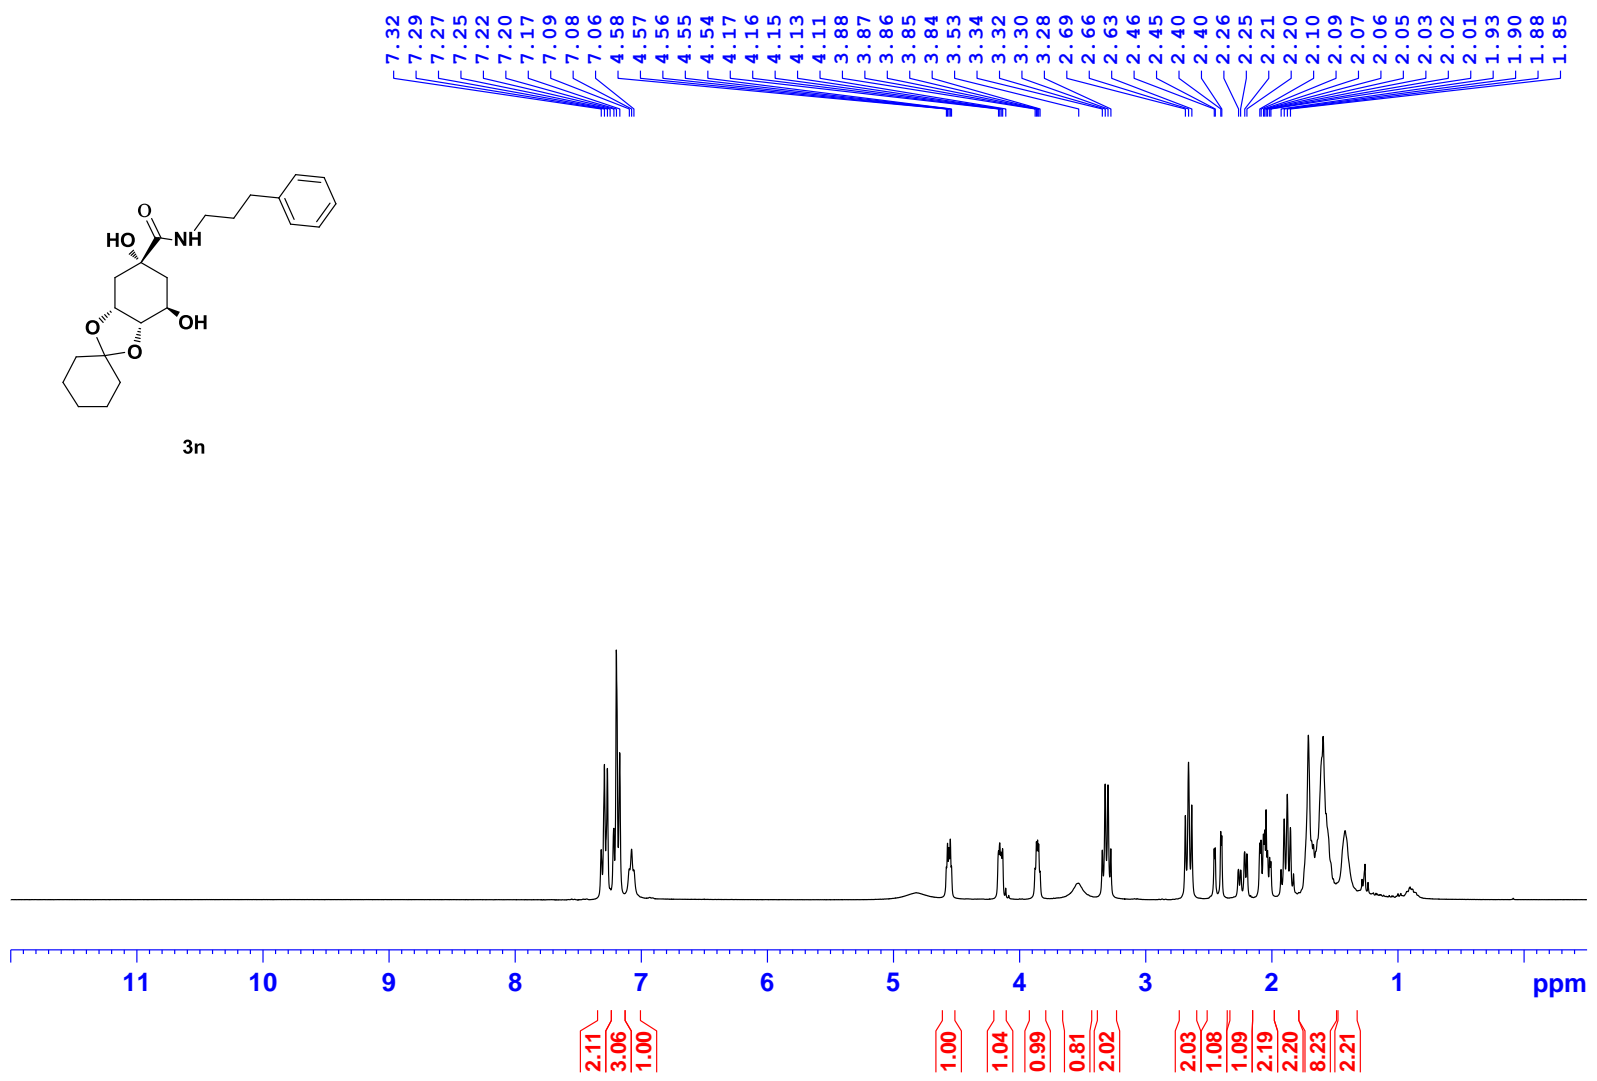

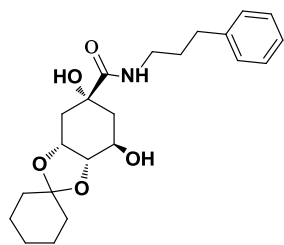

3n

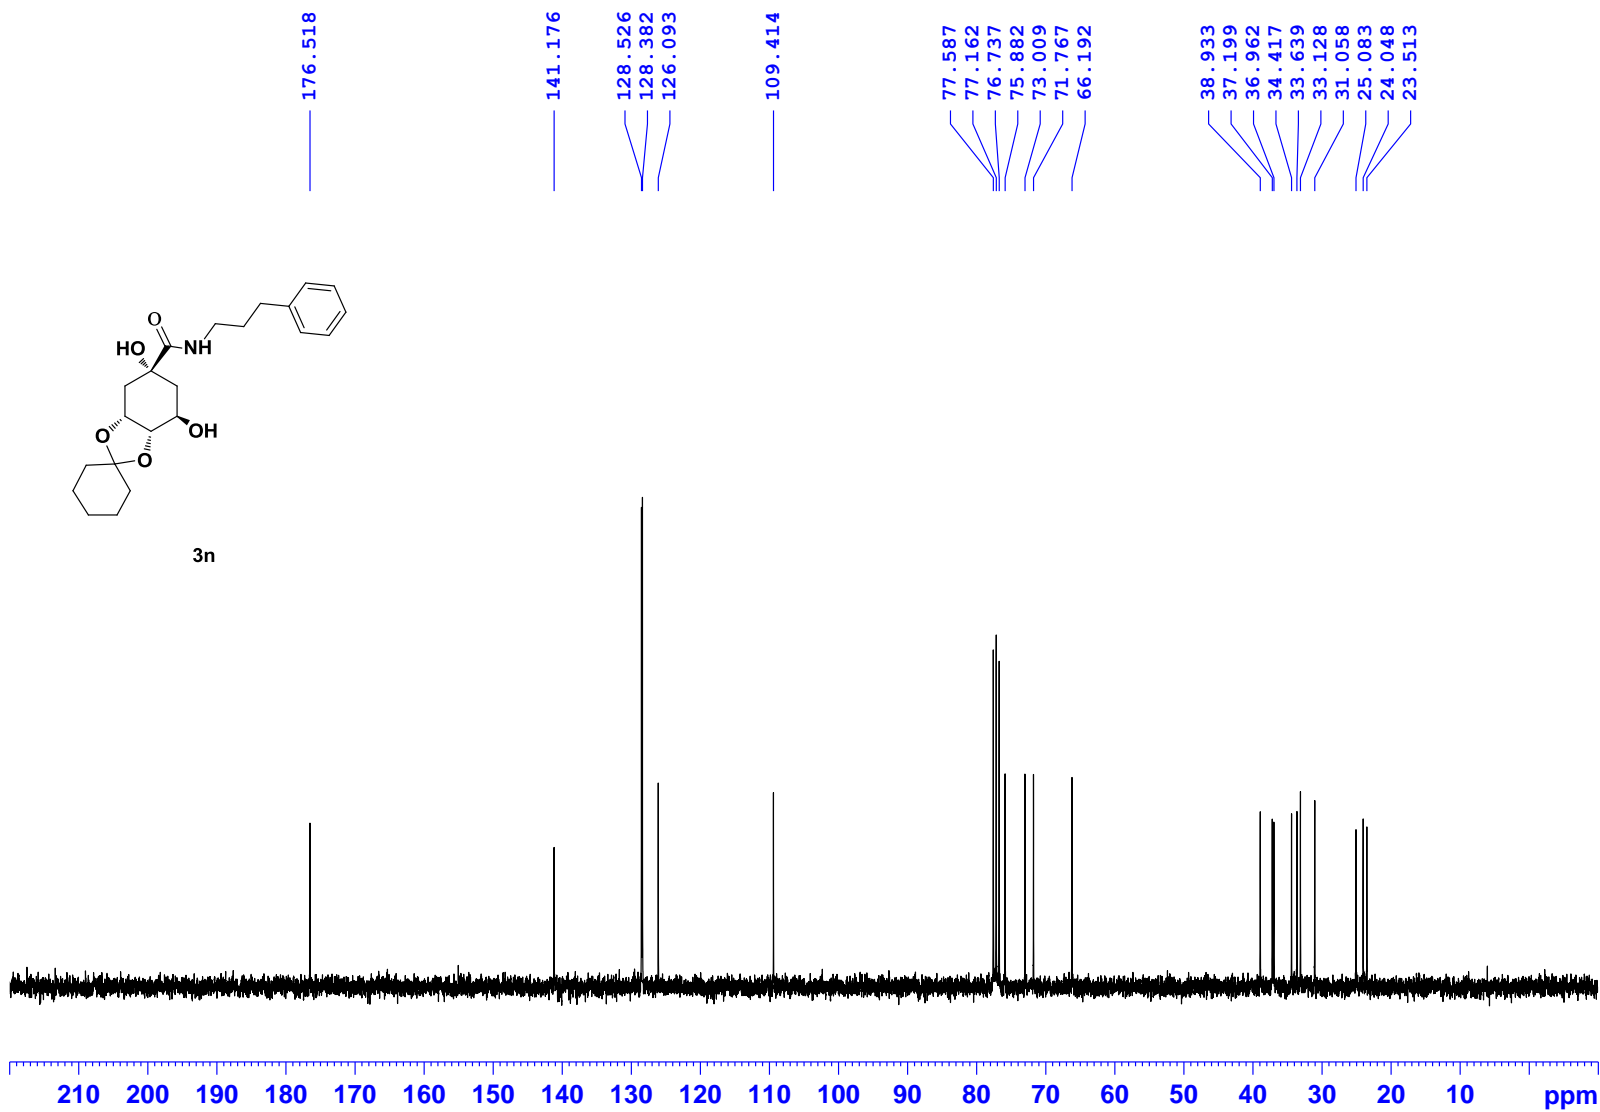



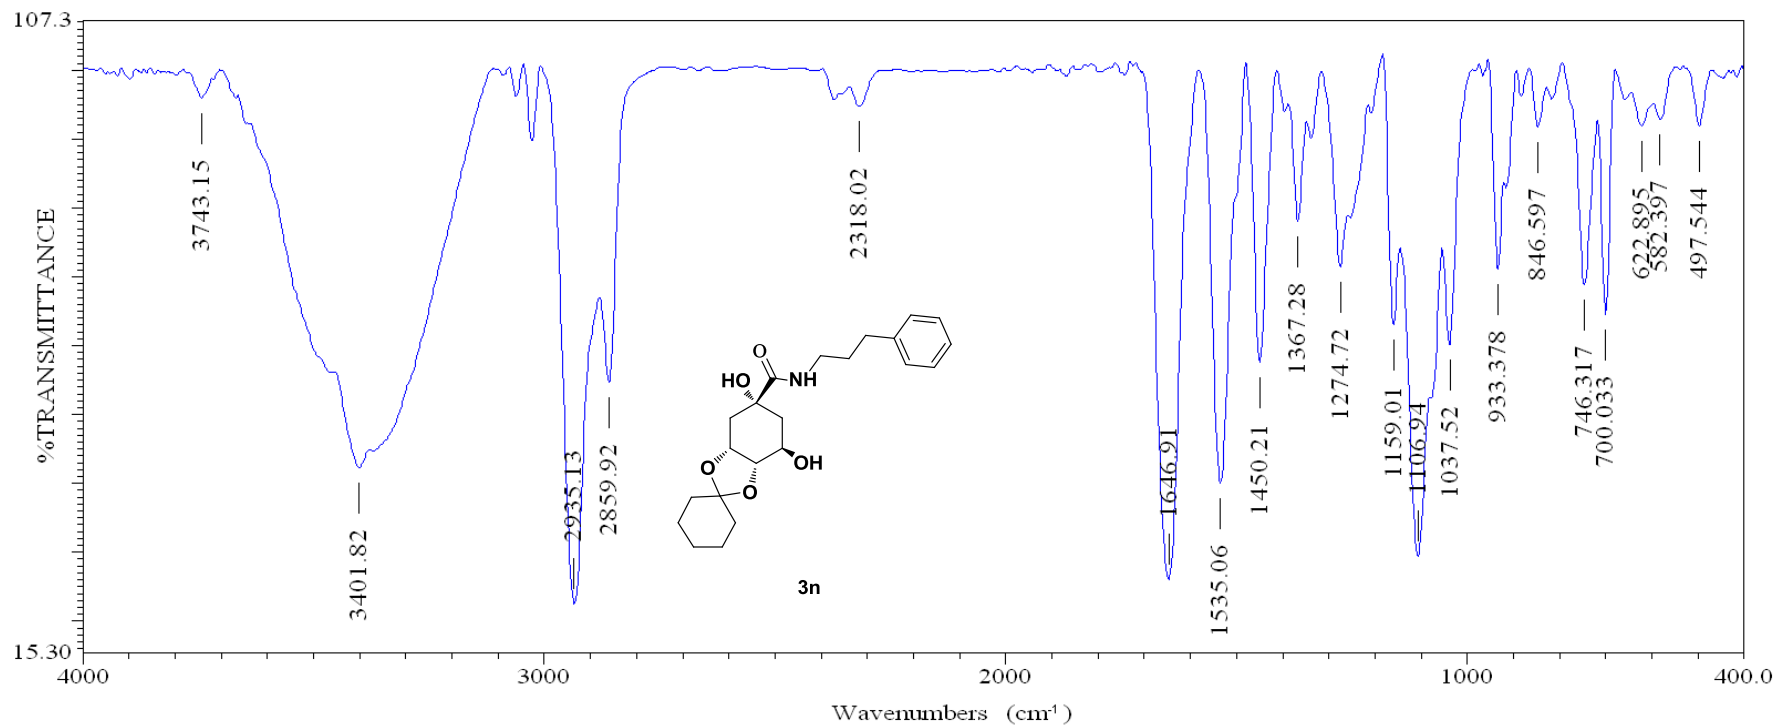

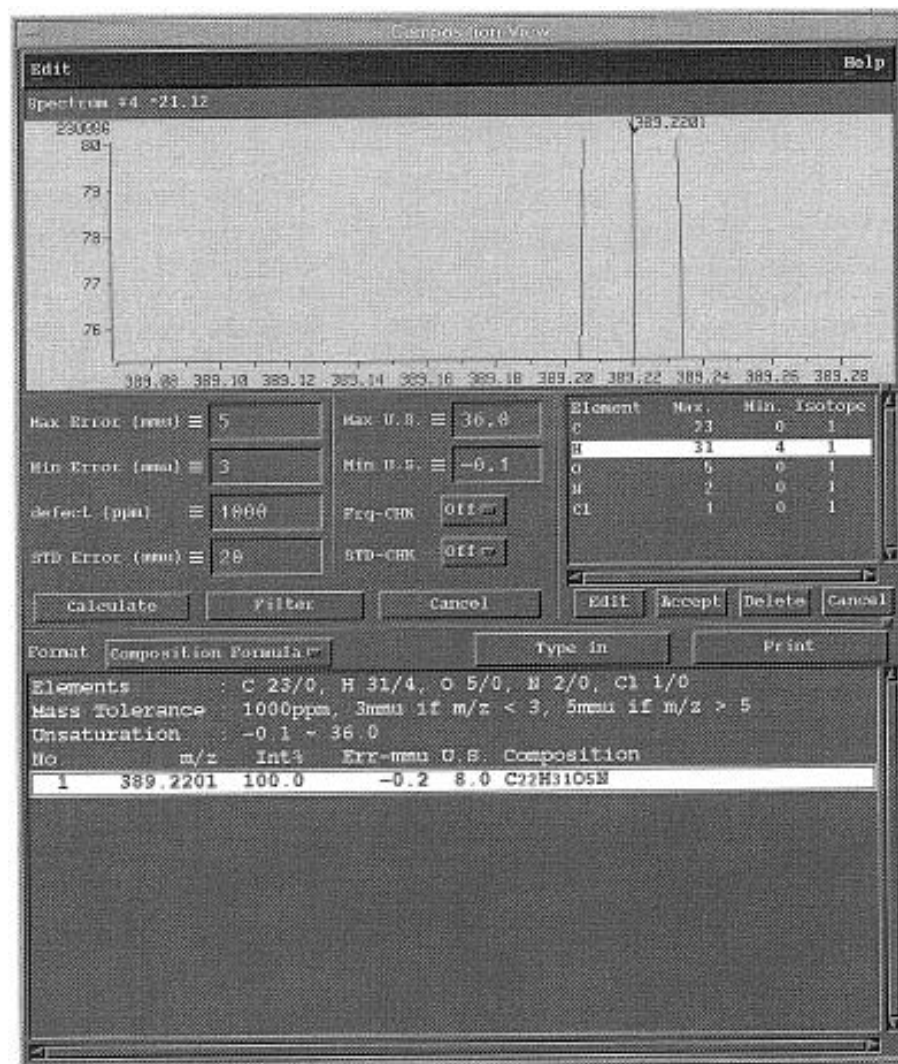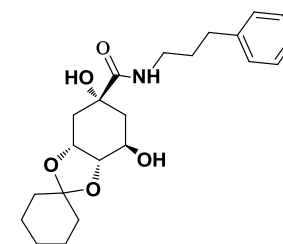

3n

[ Elemental Composition ]

Data : 201105151  
Sample: leeut D-14

Date : 31-May-2011 17:38

Note : -

Inlet : Direct

Ion Mode : EI+

RT : 0.05 min

Scan#: 3

Elements : C 23/0, H 31/4, O 5/0, N 2/0, Cl 1/0

Mass Tolerance : 1000ppm, 3mmu if m/z < 3, 5mmu if m/z > 5

Unsaturation (U.S.) : -0.1 - 36.0

| Observed m/z | Int%  | Err [ppm / mmu] | U.S. | Composition     |
|--------------|-------|-----------------|------|-----------------|
| 389.2201     | 100.0 | -0.4 / -0.2     | 8.0  | C 22 H 31 O 5 N |

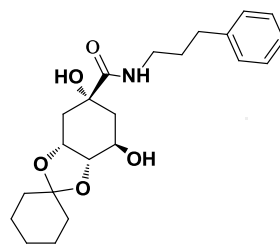

3n

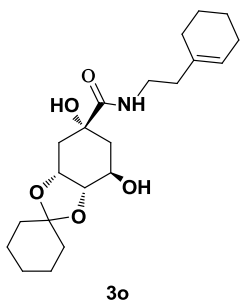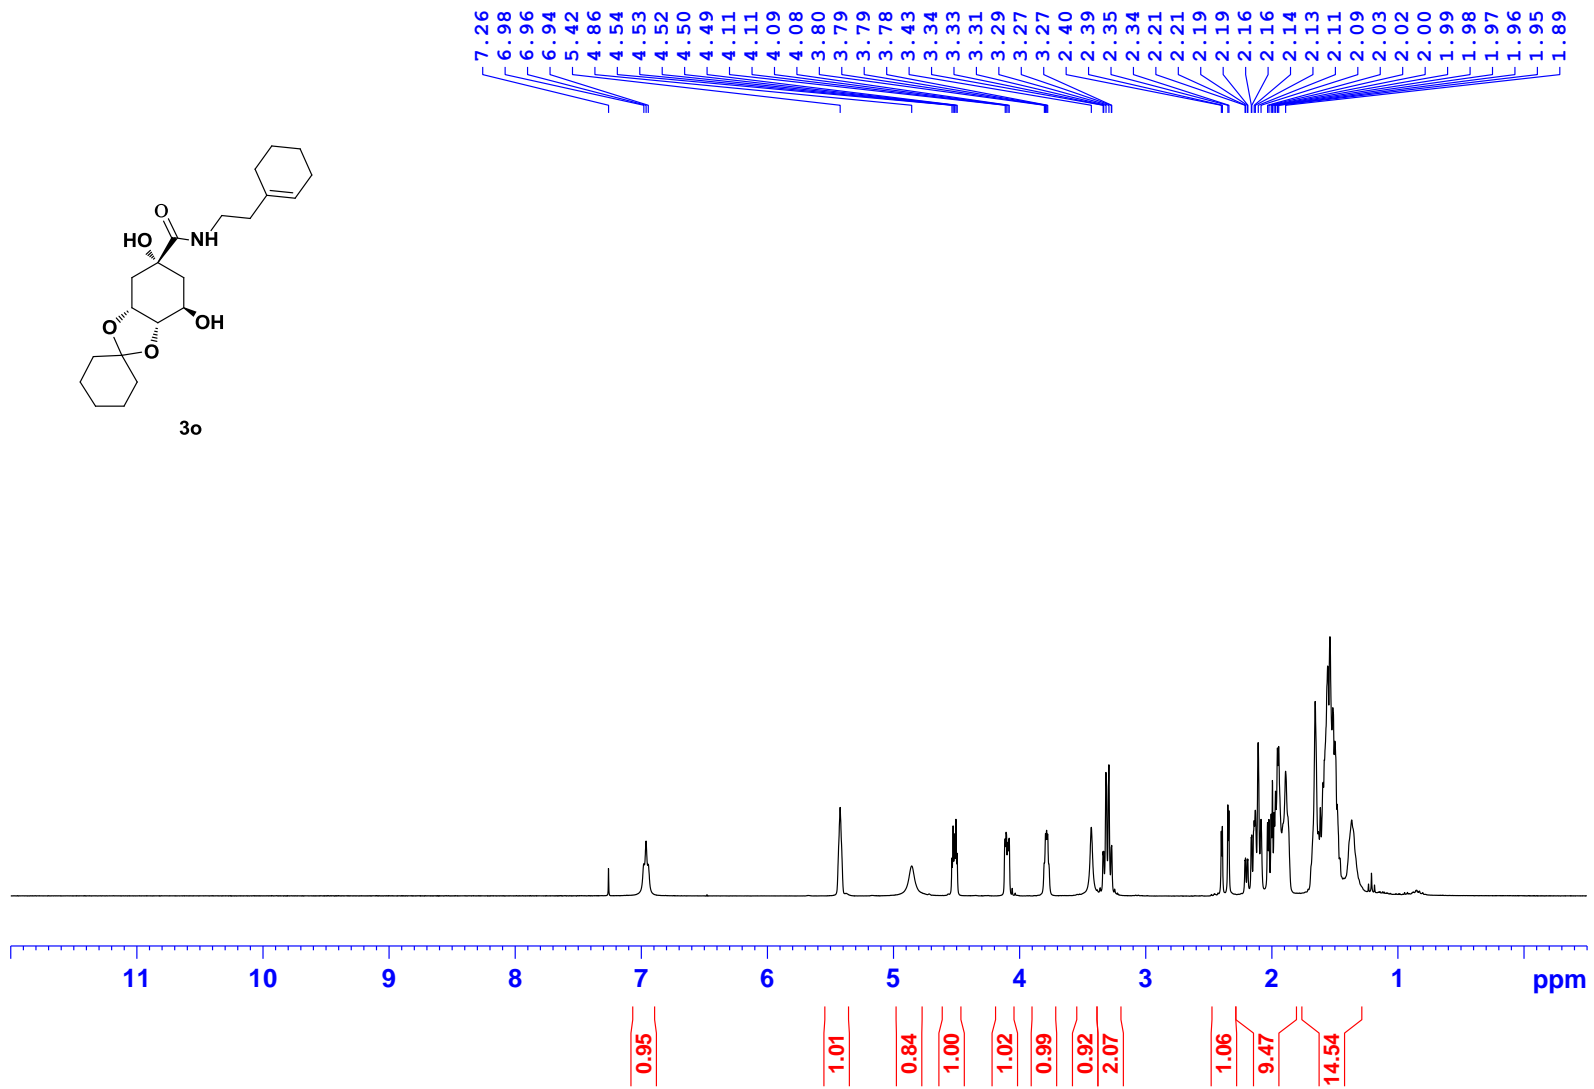

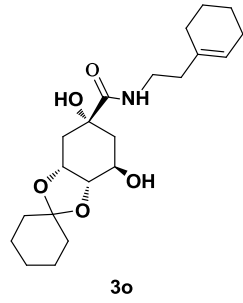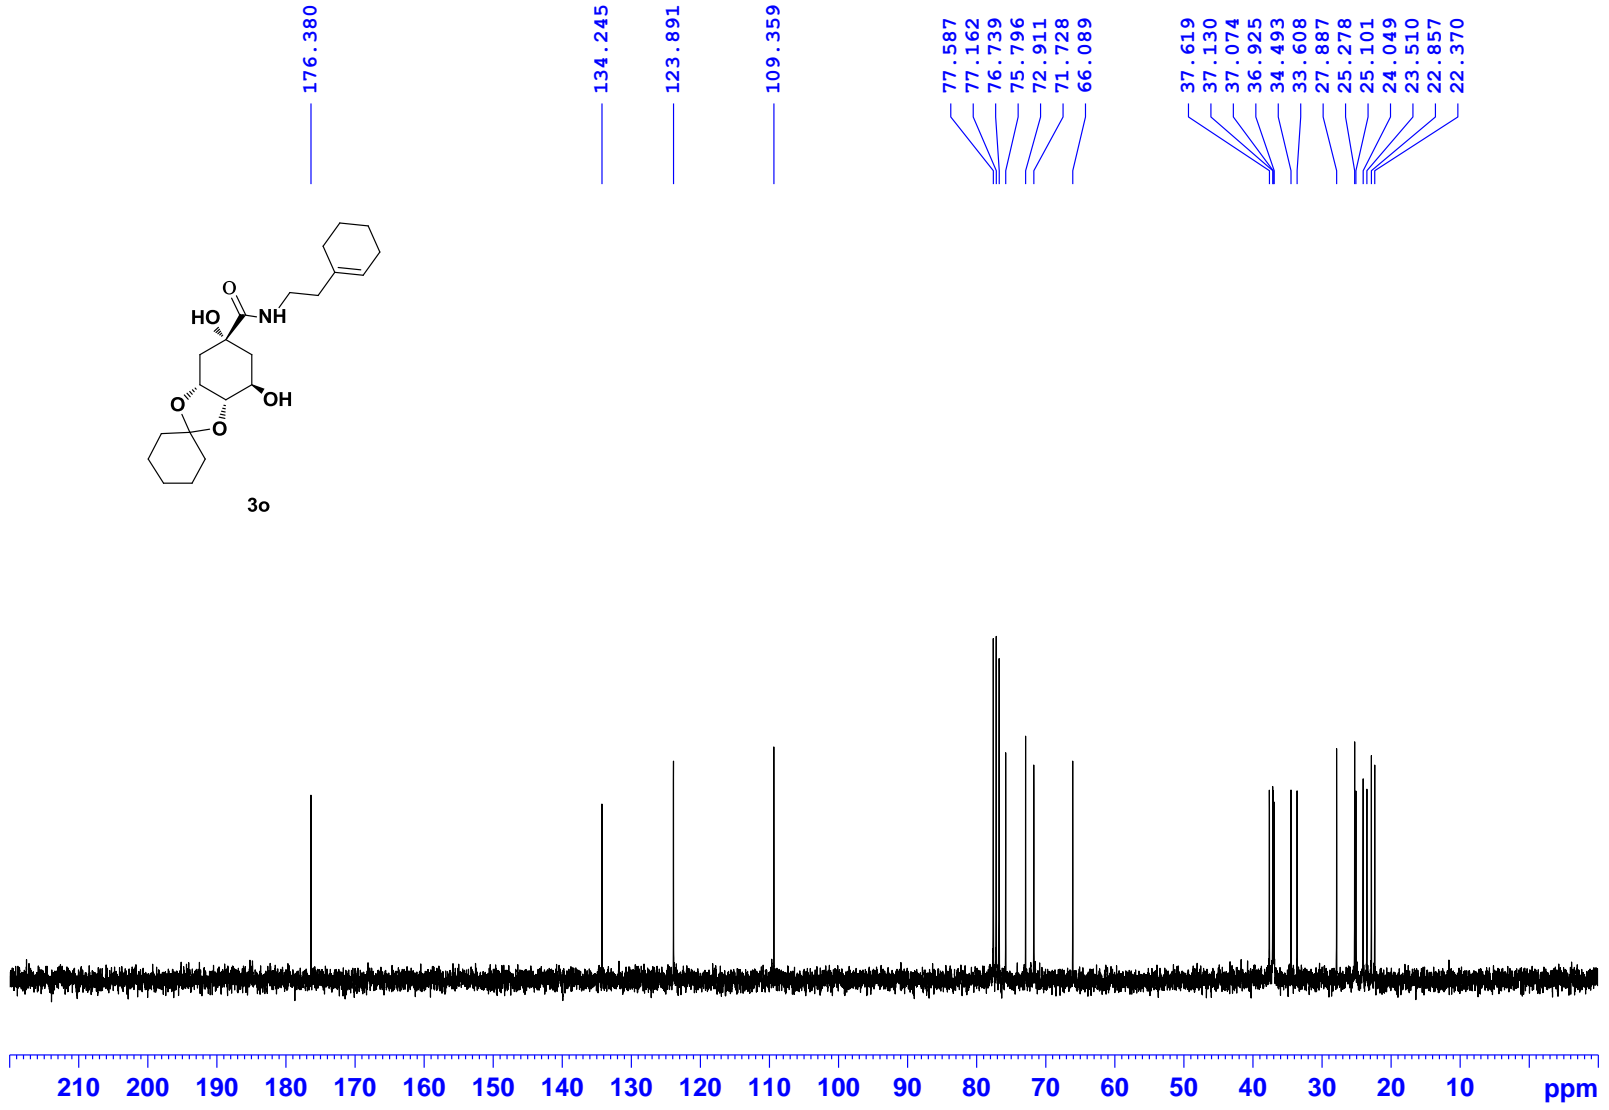

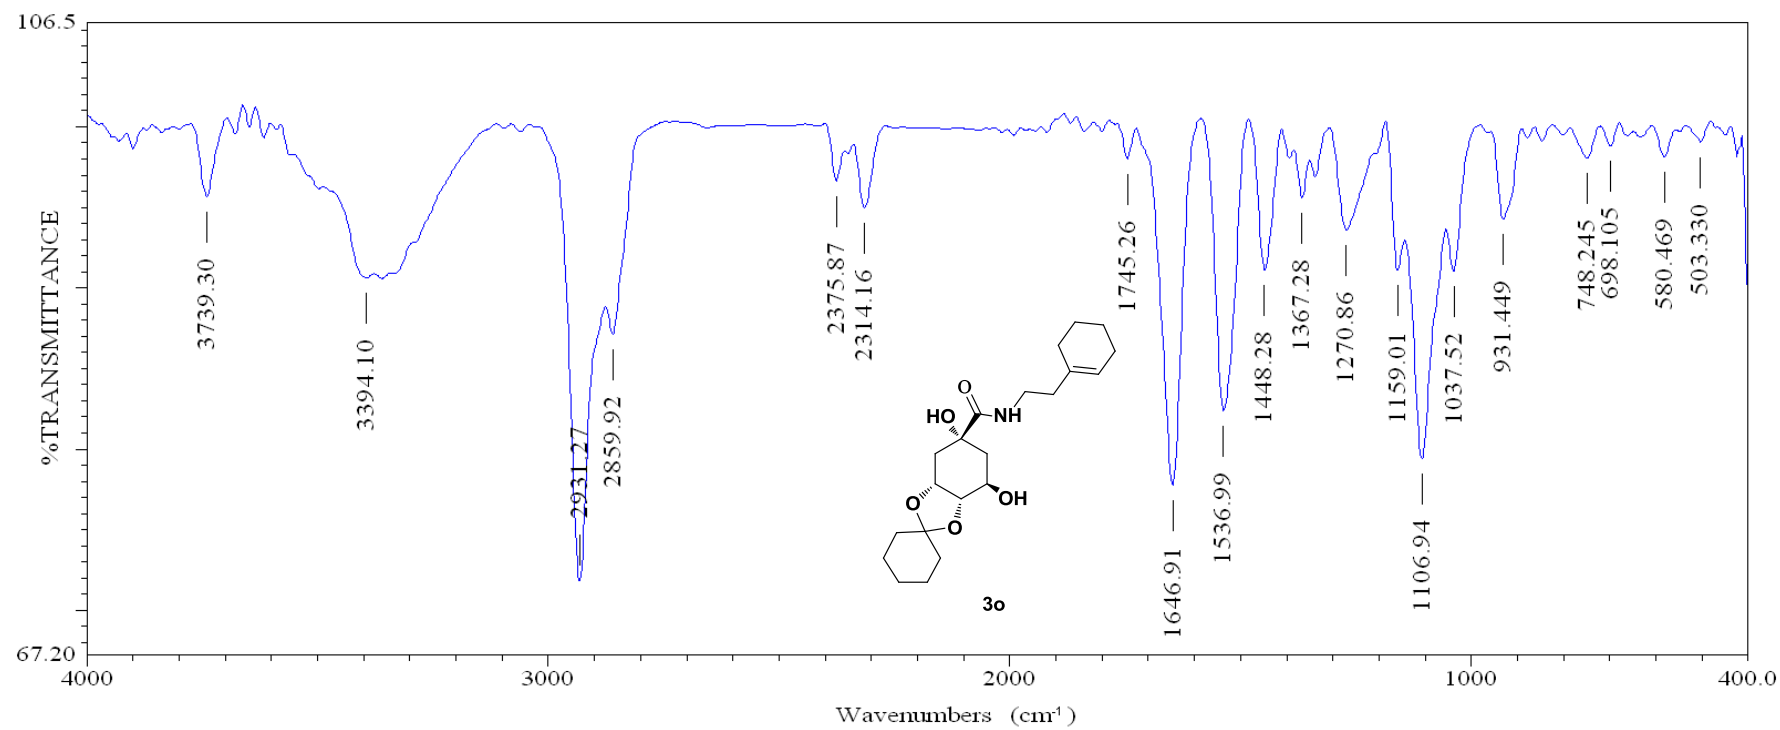

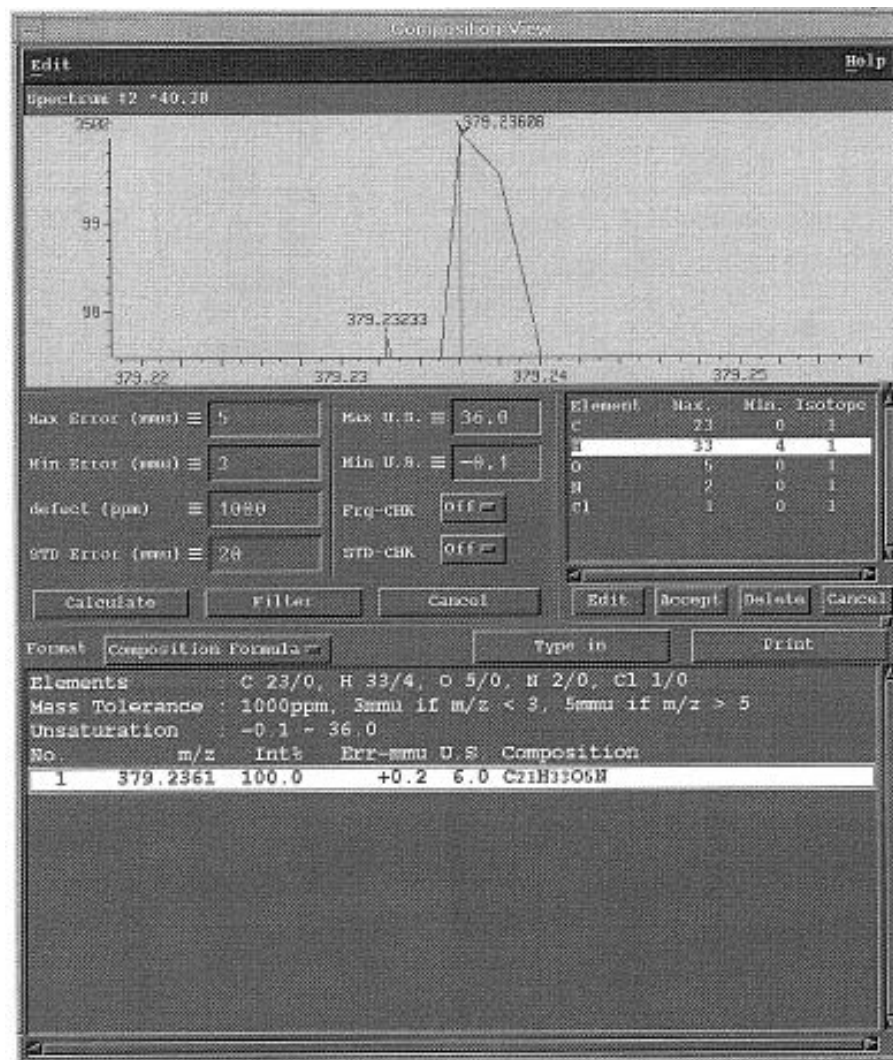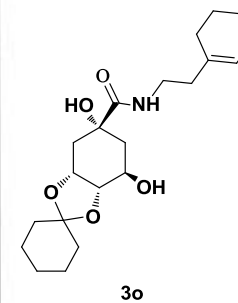

[ Elemental Composition ]

Data : 201105152

Sample: leeut D-15

Note : -

Inlet : Direct

RT : 1.59 min

Elements : C 23/0, H 33/4, O 5/0, N 2/0, Cl 1/0

Mass Tolerance : 1000ppm, 3mmu if m/z < 3, 5mmu if m/z > 5

Unsaturation (U.S.) : -0.1 - 36.0

Date : 01-Jun-2011 10:39

Page: 1

Ion Mode : EI+

Scan#: 70

| Observed m/z | Int%  | Err [ppm / mmu] | U.S. | Composition     |
|--------------|-------|-----------------|------|-----------------|
| 379.2361     | 100.0 | +0.6 / +0.2     | 6.0  | C 21 H 33 O 5 N |

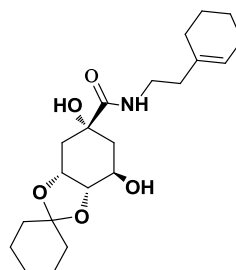

30



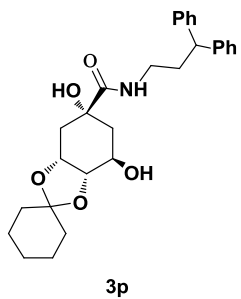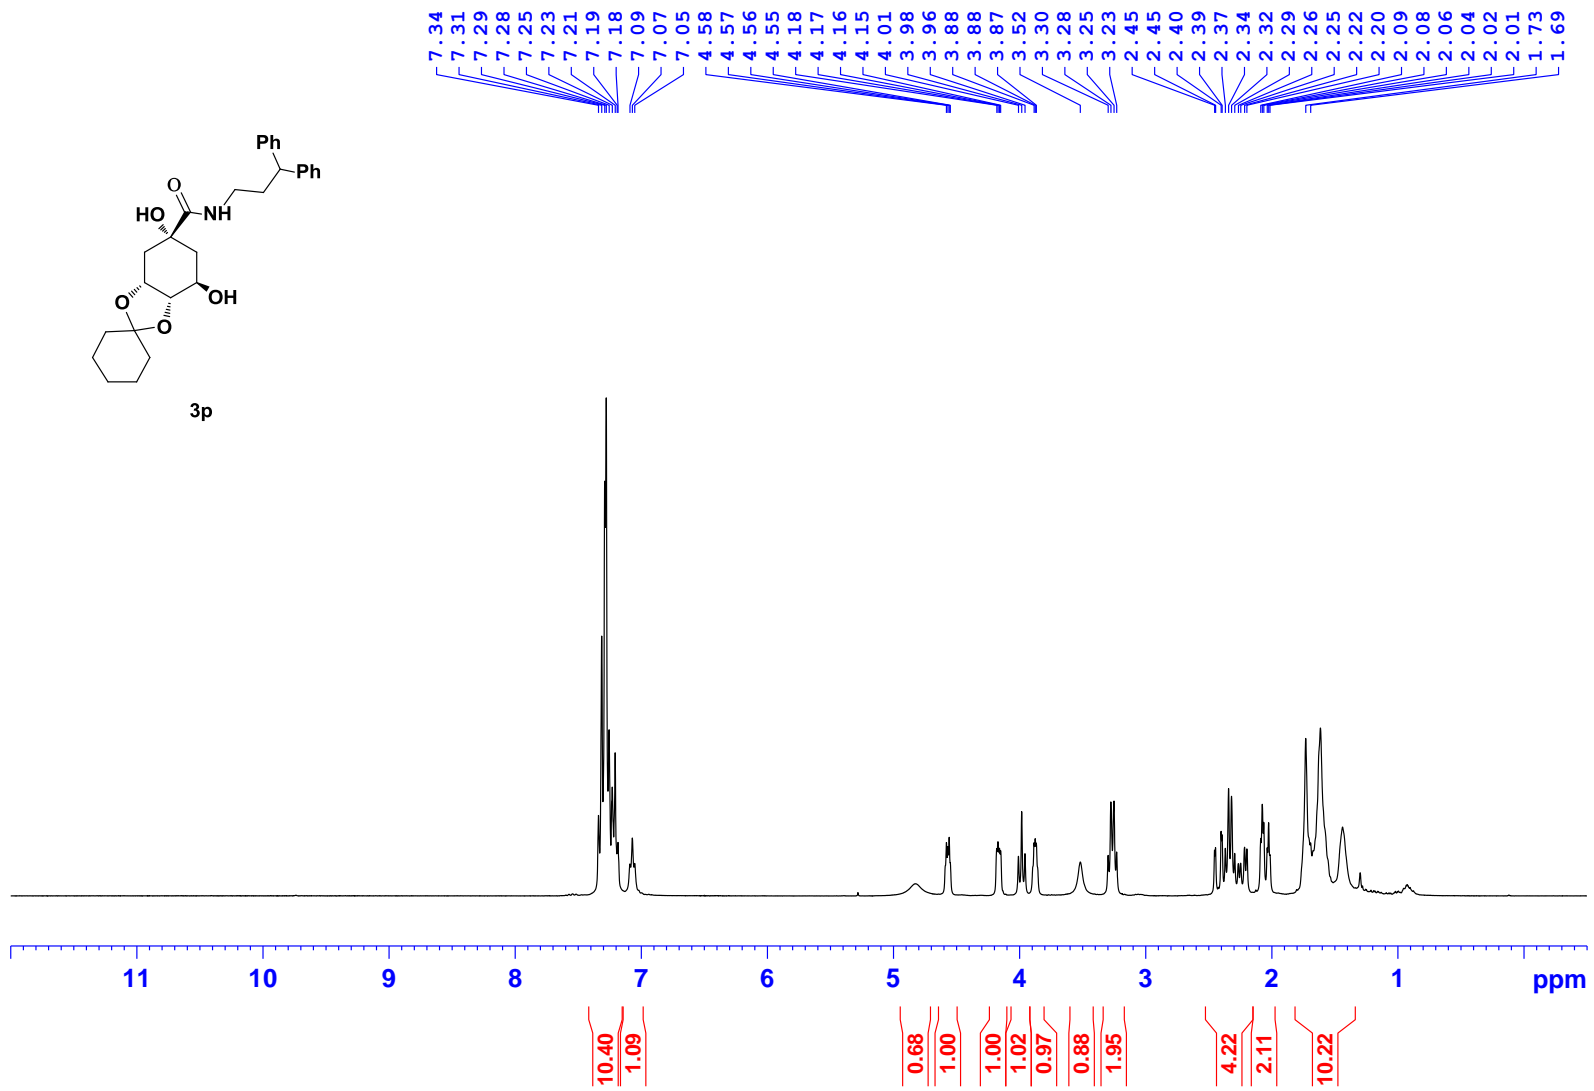

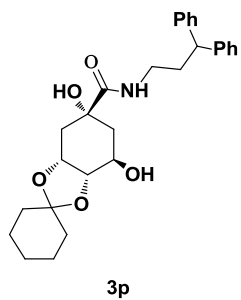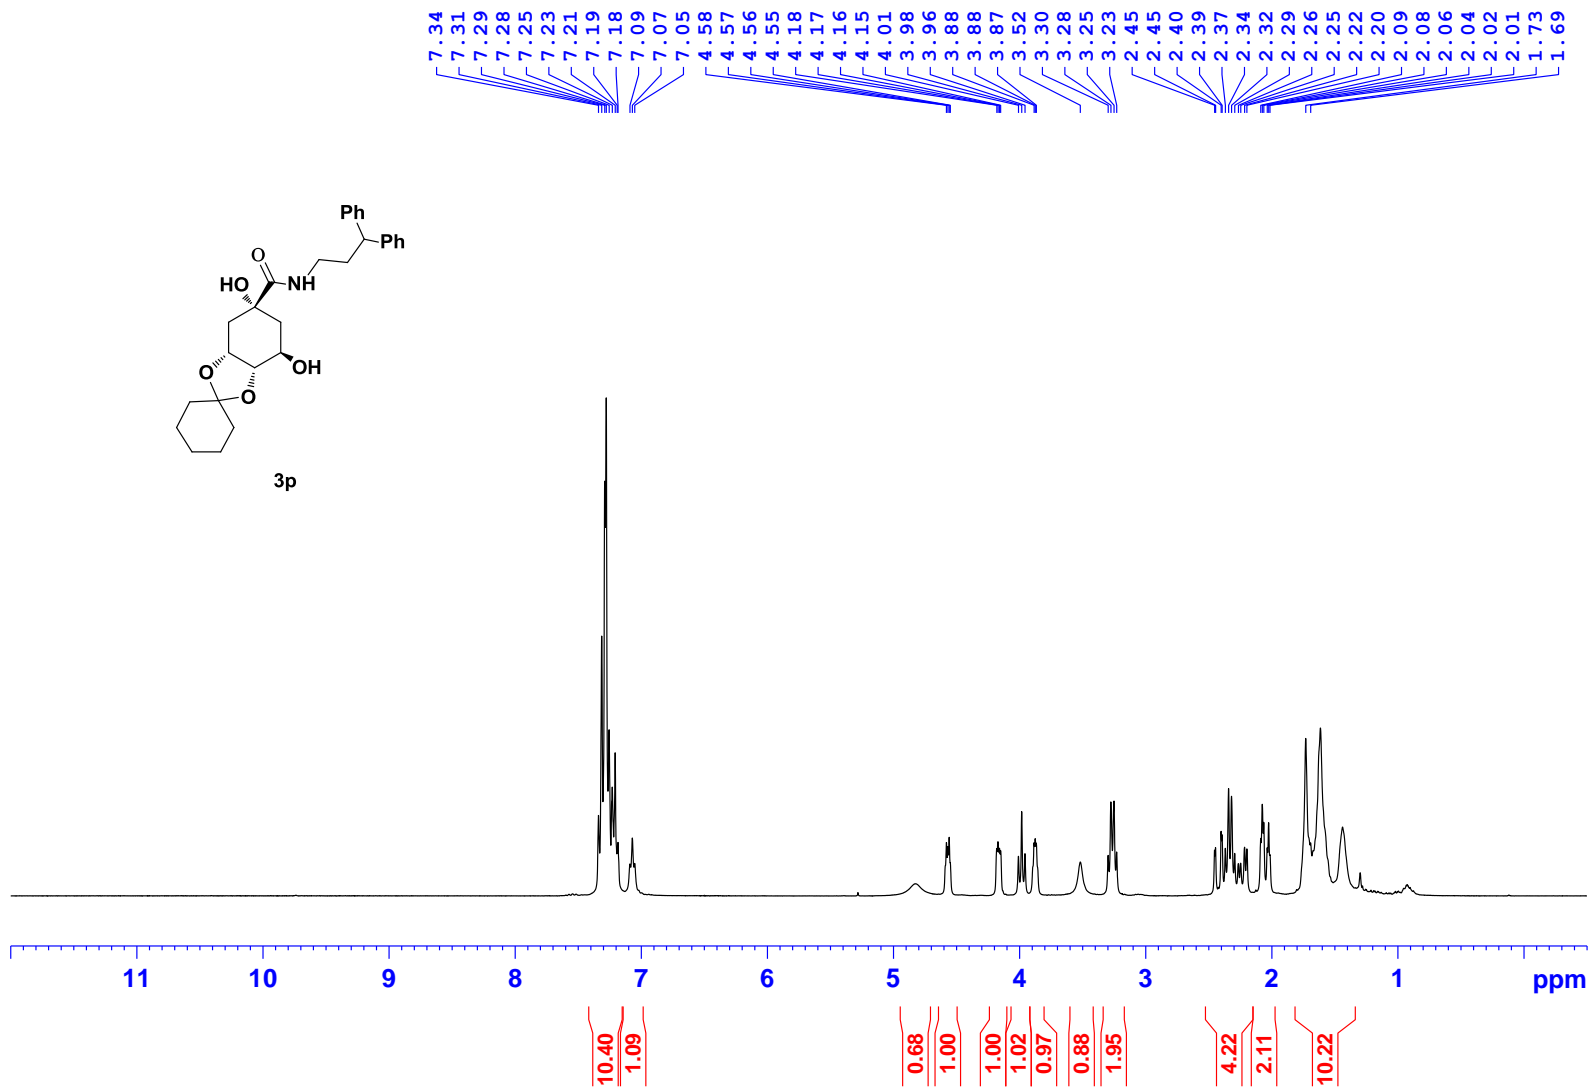

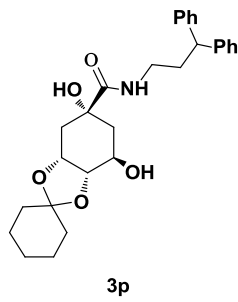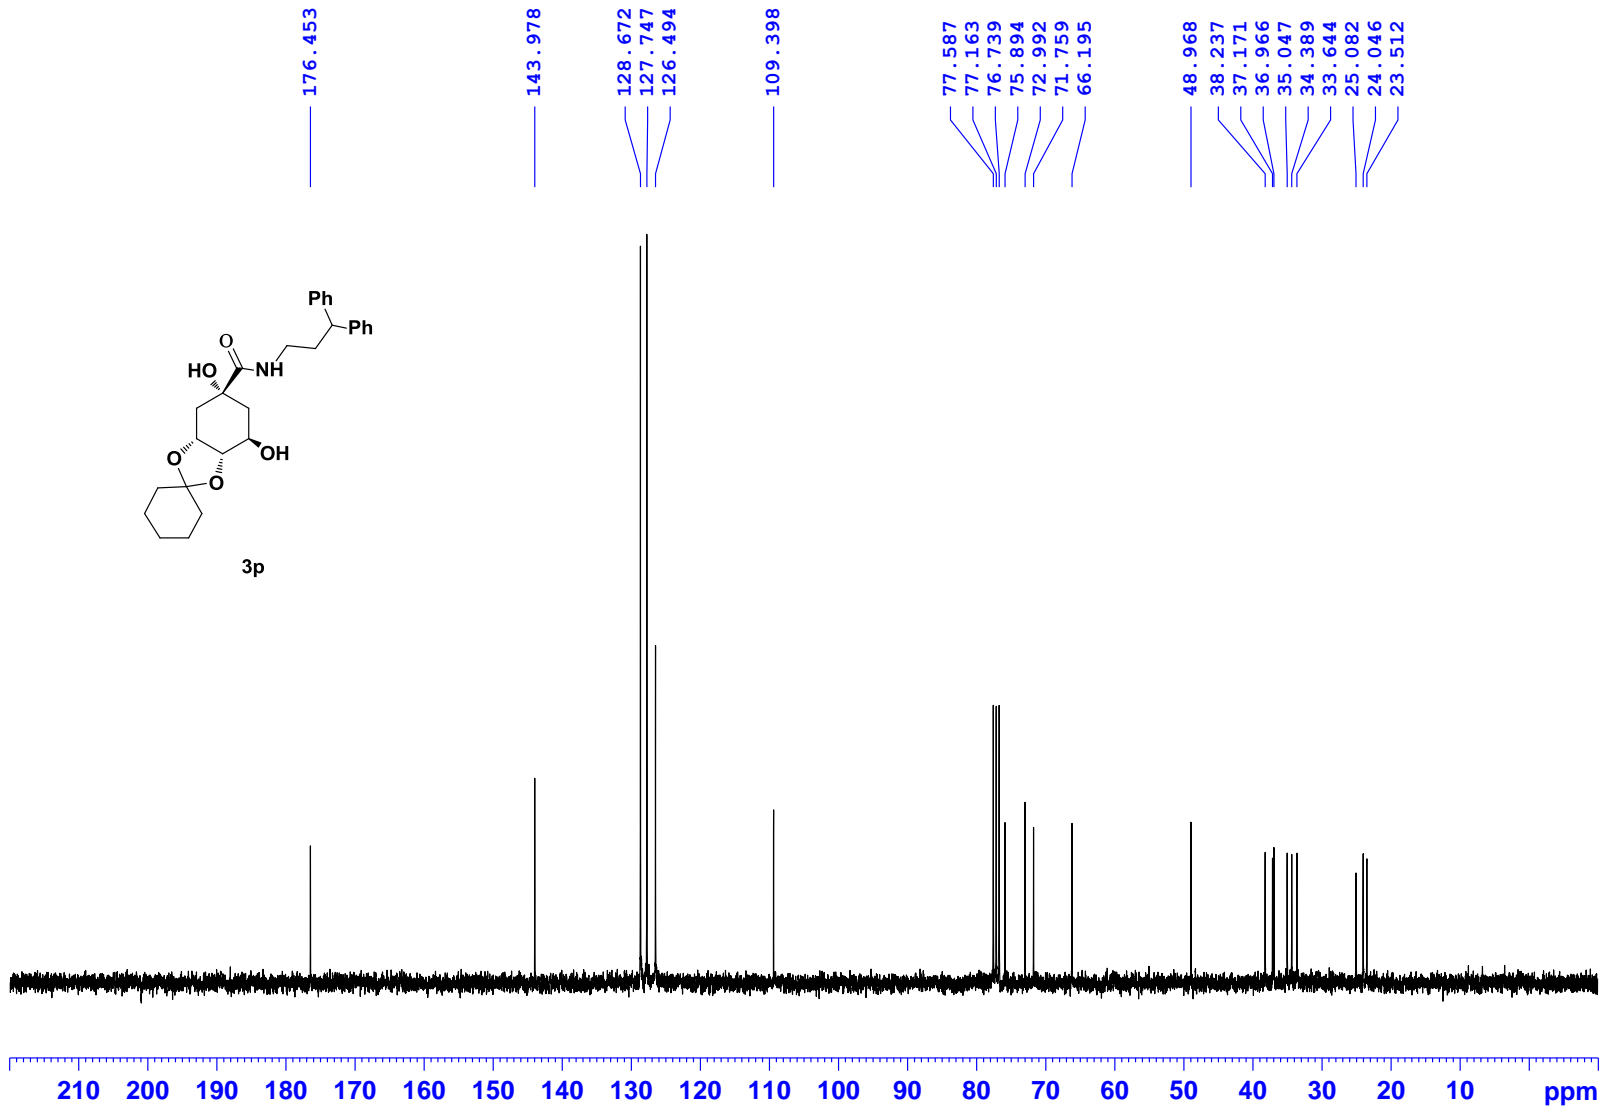

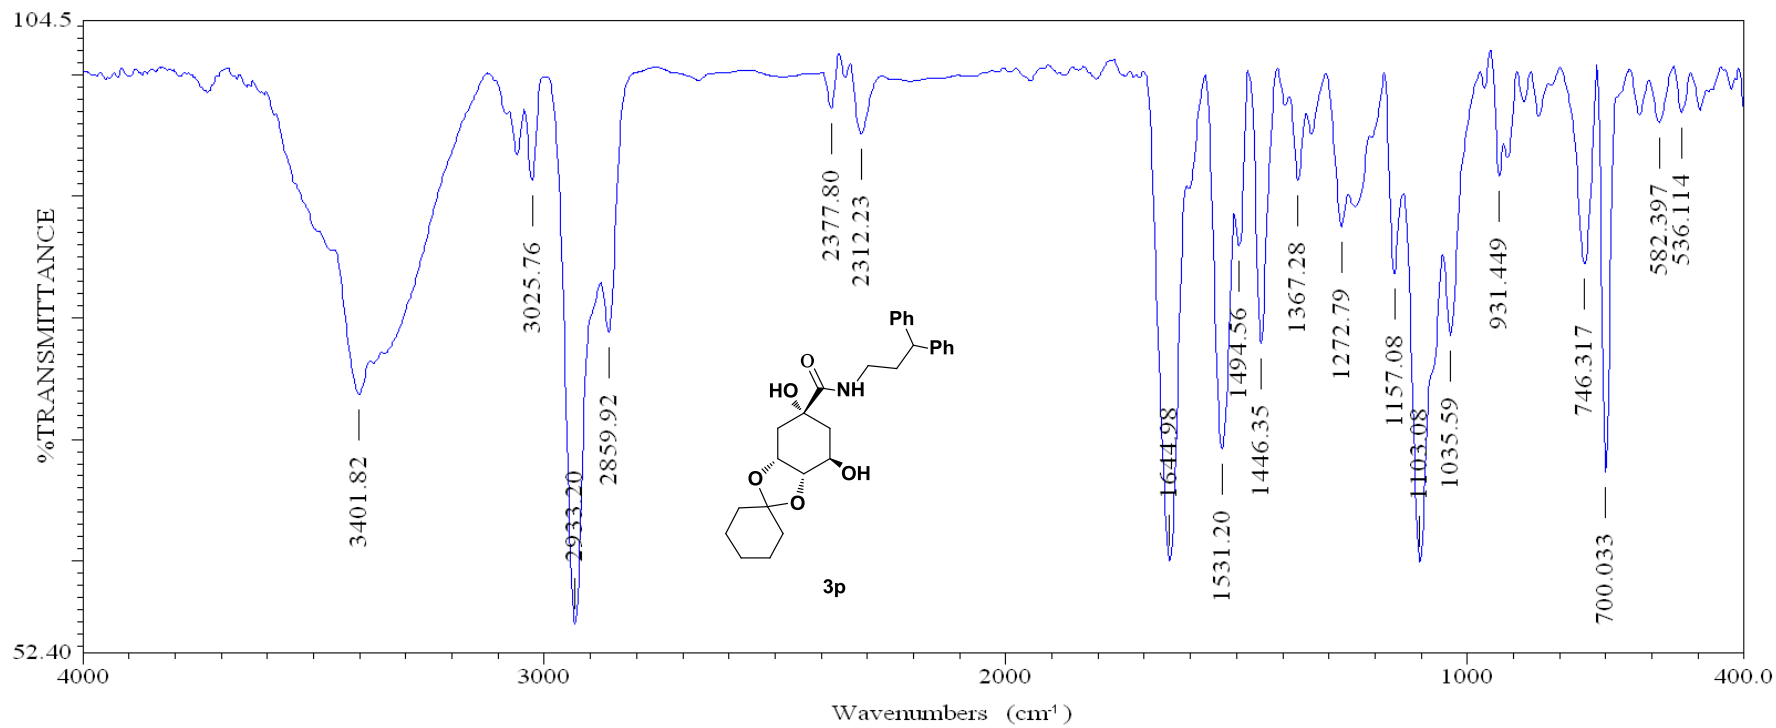

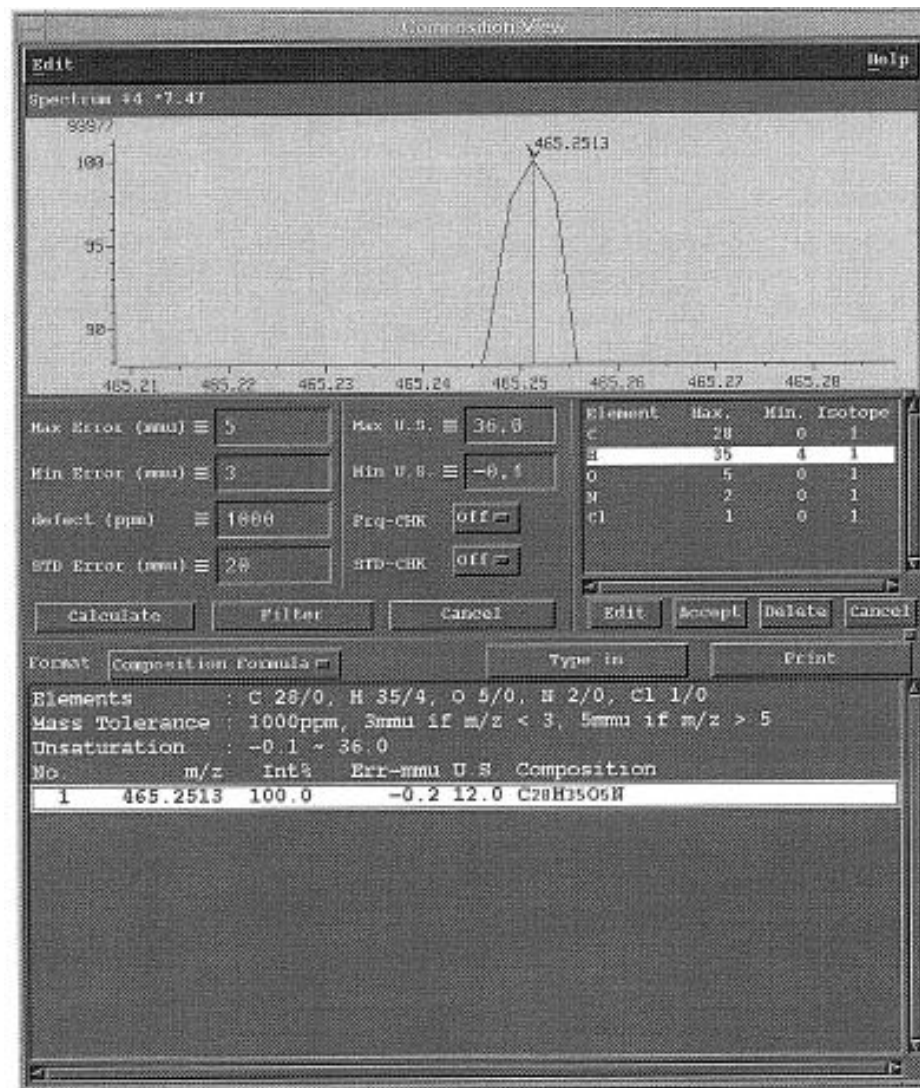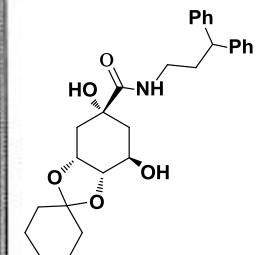

3p

[ Elemental Composition ]

Page: 1

Data : 201105153

Date : 01-Jun-2011 10:46

Sample: leeut D-16

Note : -

Inlet : Direct

Ion Mode : EI+

RT : 0.99 min

Scan#: 50

Elements : C 28/0, H 35/4, O 5/0, N 2/0, Cl 1/0

Mass Tolerance : 1000ppm, 3mmu if m/z < 3, 5mmu if m/z > 5

Unsaturation (U.S.) : -0.1 - 36.0

| Observed m/z | Int%  | Err[ppm / mmu] | U.S. | Composition     |
|--------------|-------|----------------|------|-----------------|
| 465.2513     | 100.0 | -0.4 / -0.2    | 12.0 | C 28 H 35 O 5 N |

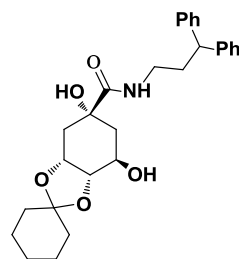

3p

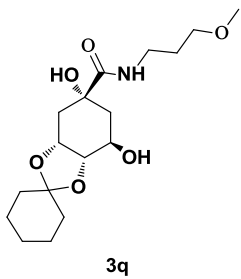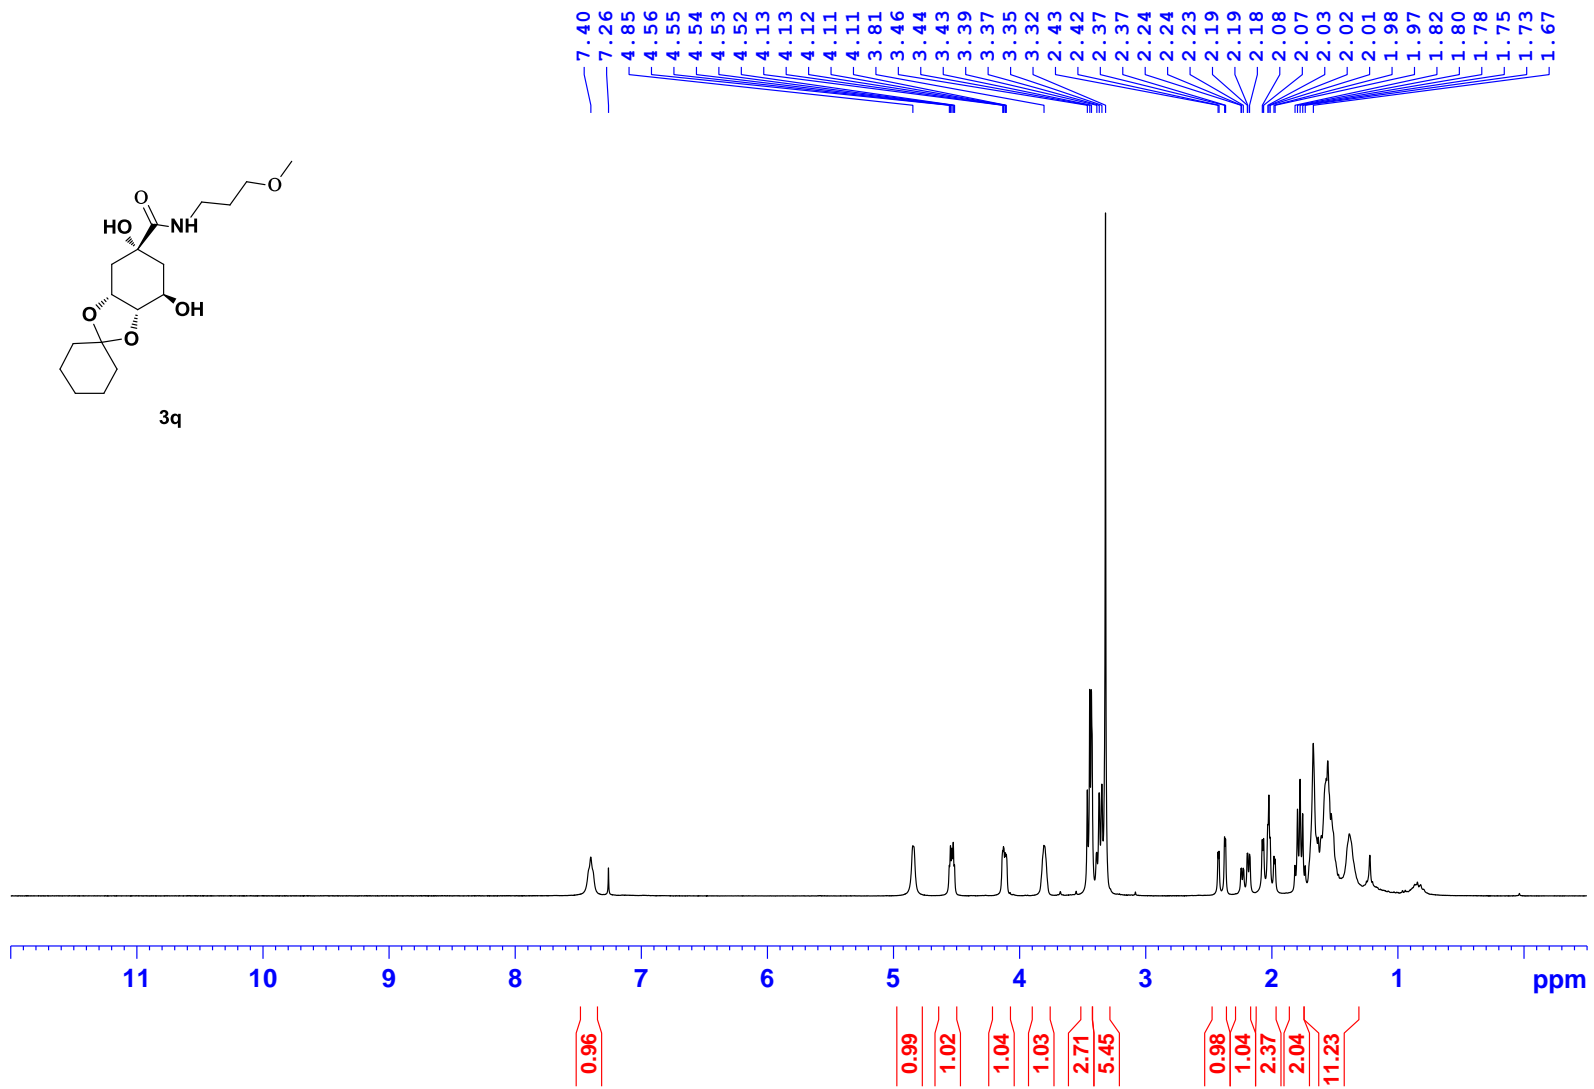

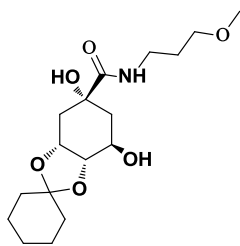

3q

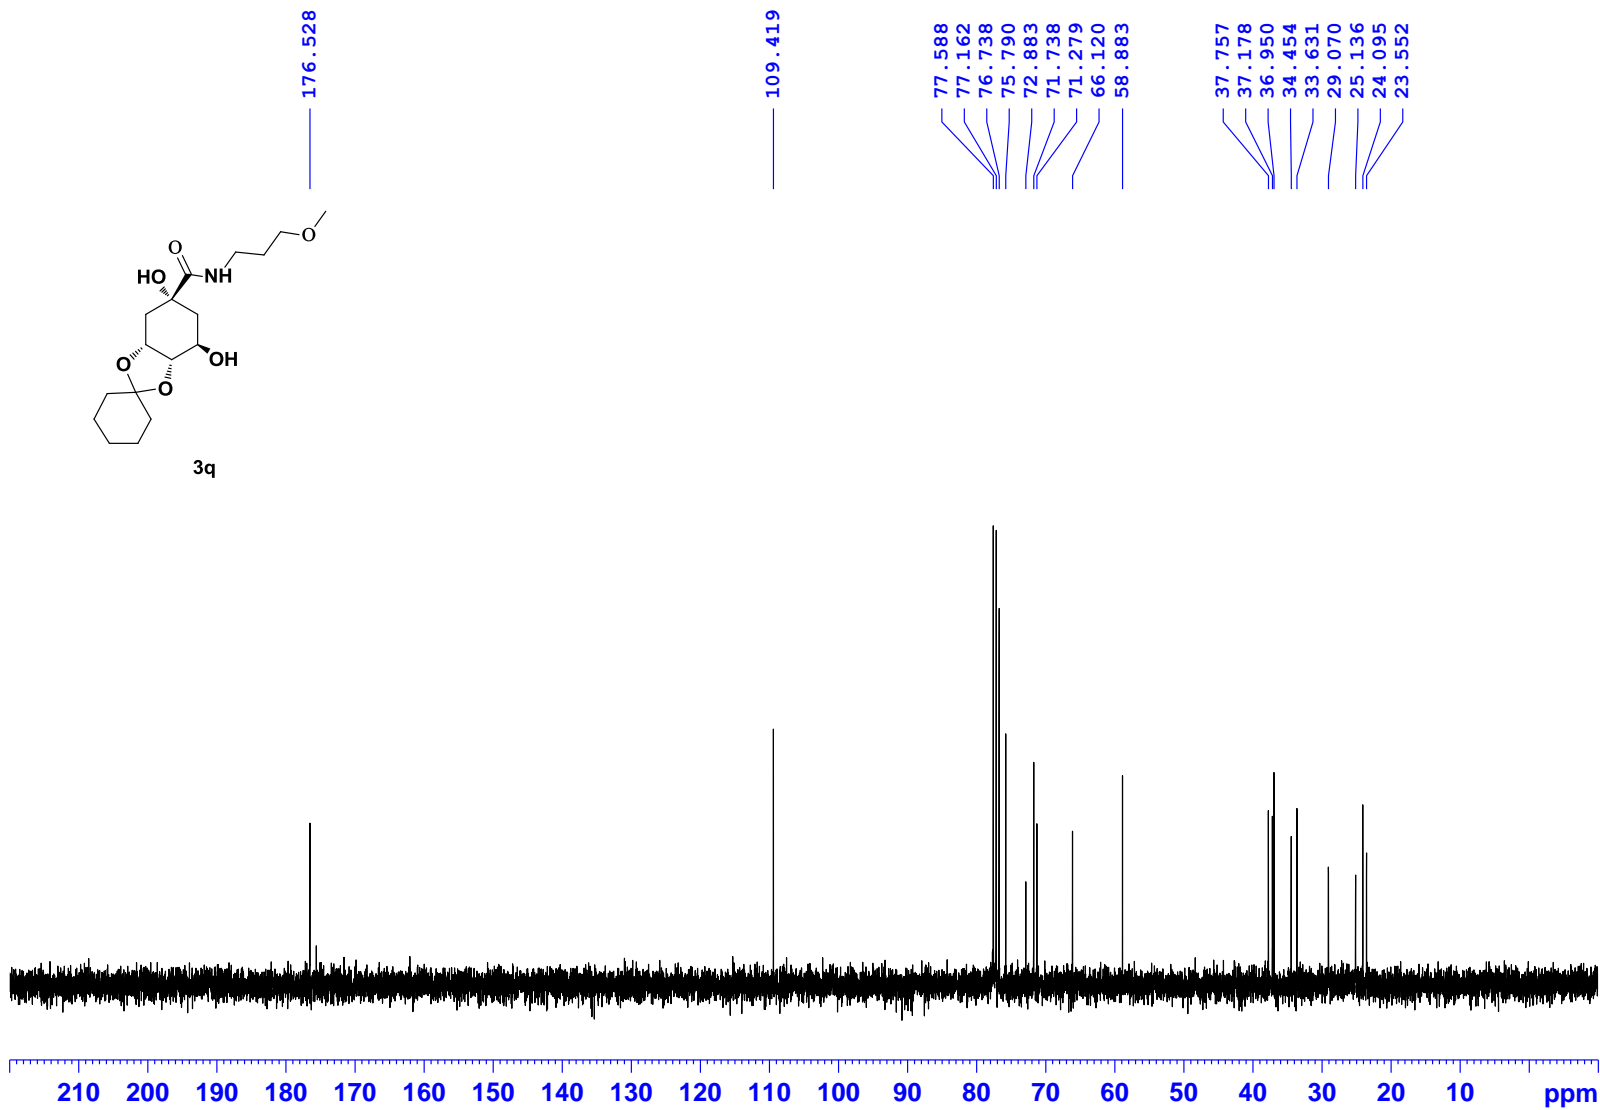



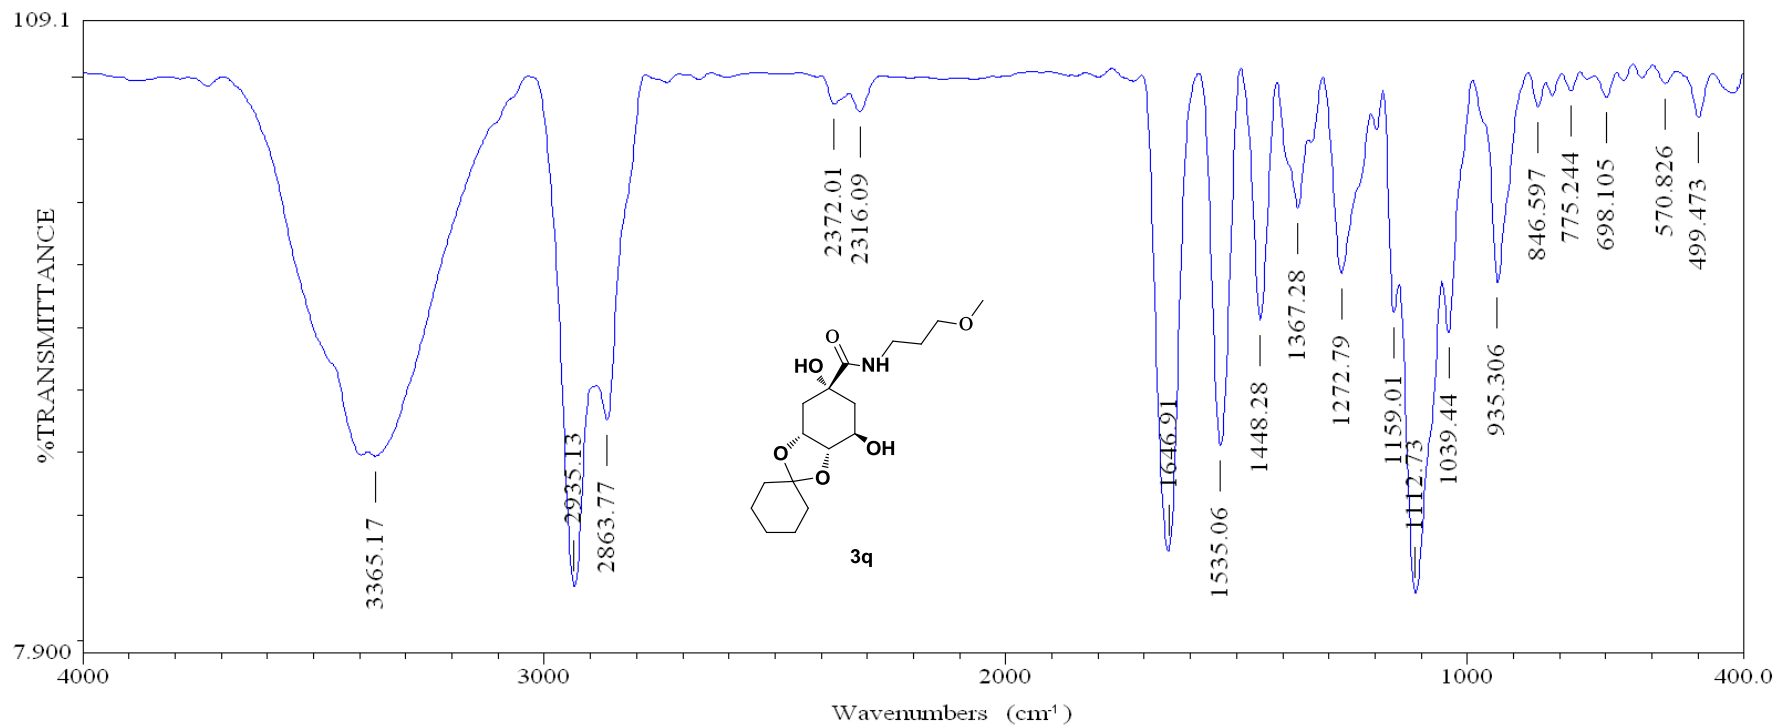

SPEC: lei5125(leeutd17) 15-Sep-11 REG : 00:49.5 #9  
Samp: Start : 12:39:17 90  
Mode: EI +VE +LMR BSCAN (EXP) UP LR NRM  
Oper: Inlet :  
Base: 300.2 Inten : 770126 Masses: 45 > 450  
Norm: 300.2 RIC : 5523135 #peaks: 328  
Peak: 1000.00 mmu  
Data: +/8>19

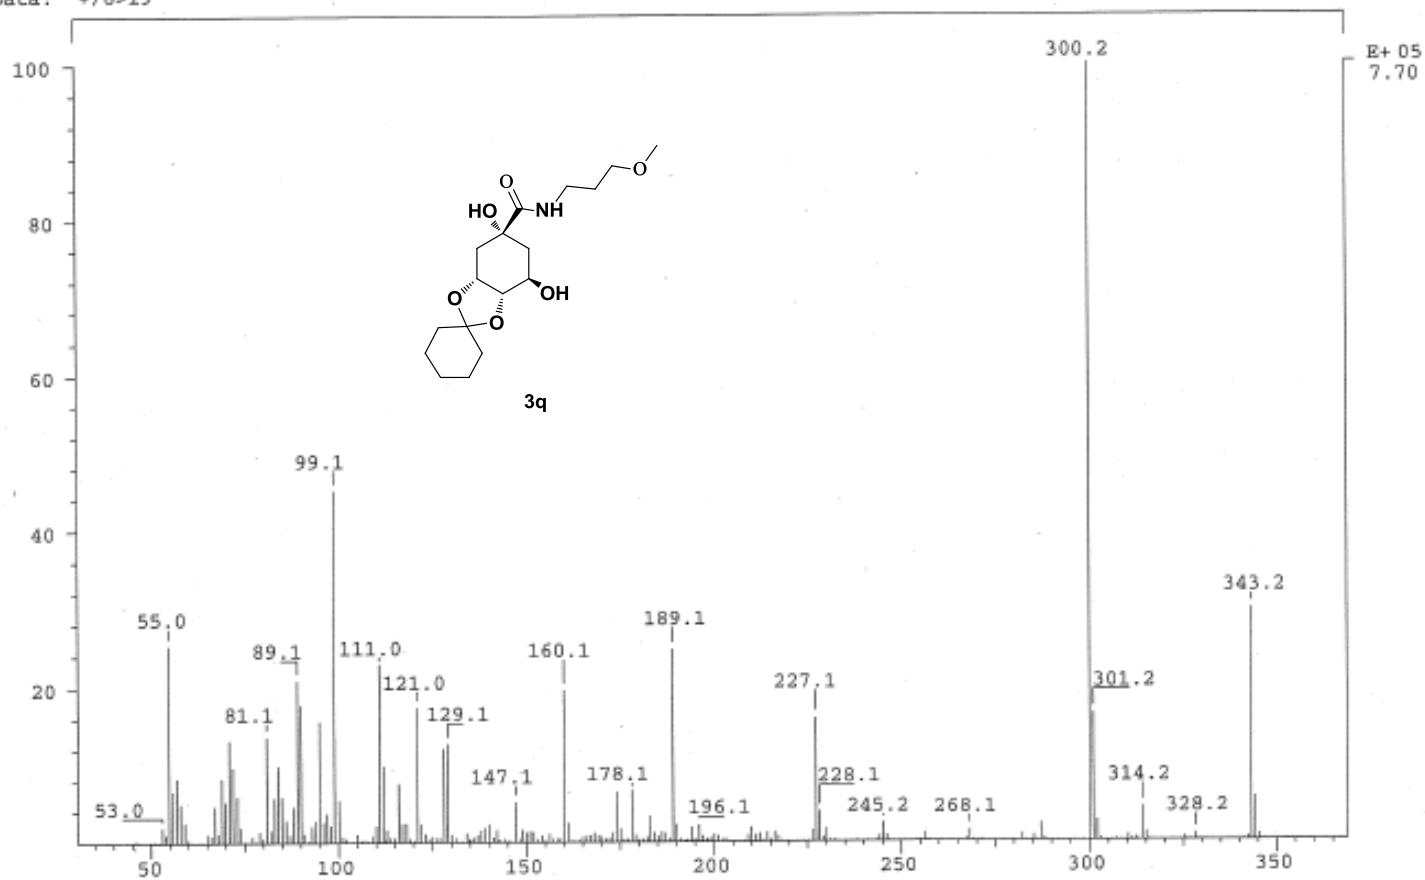



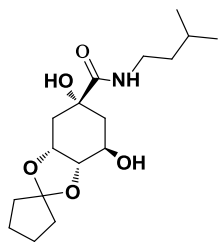

3r

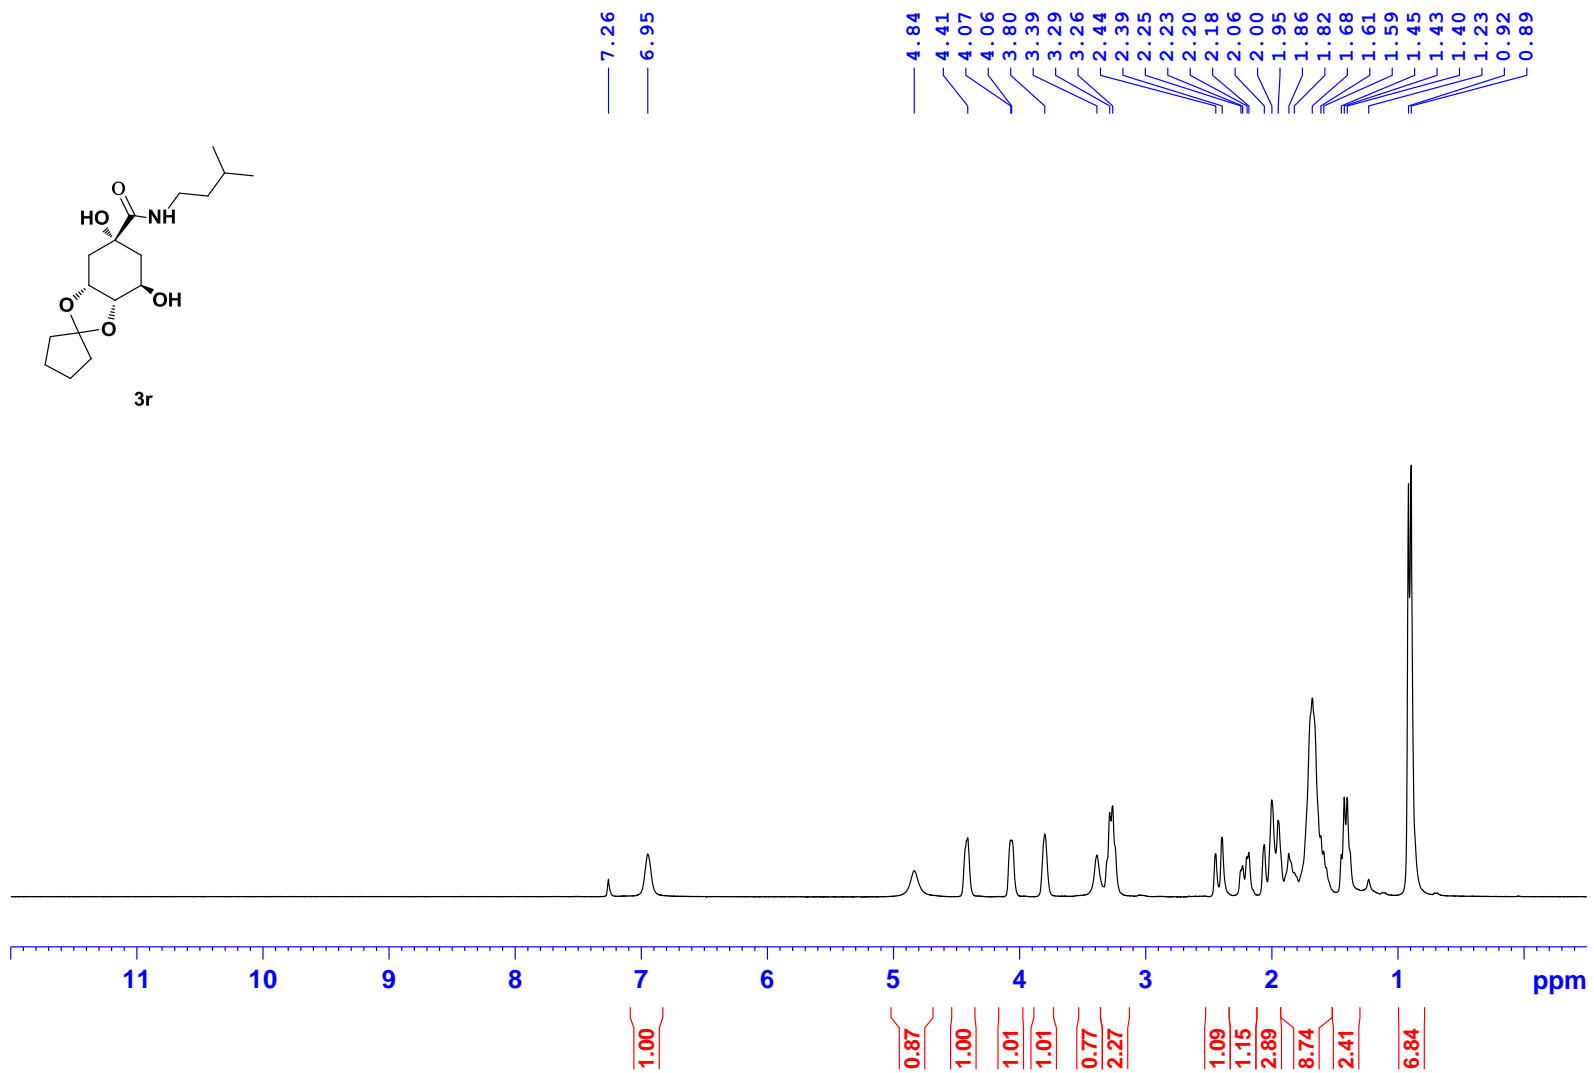

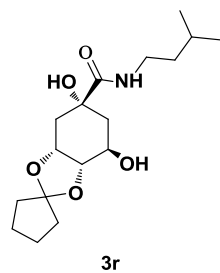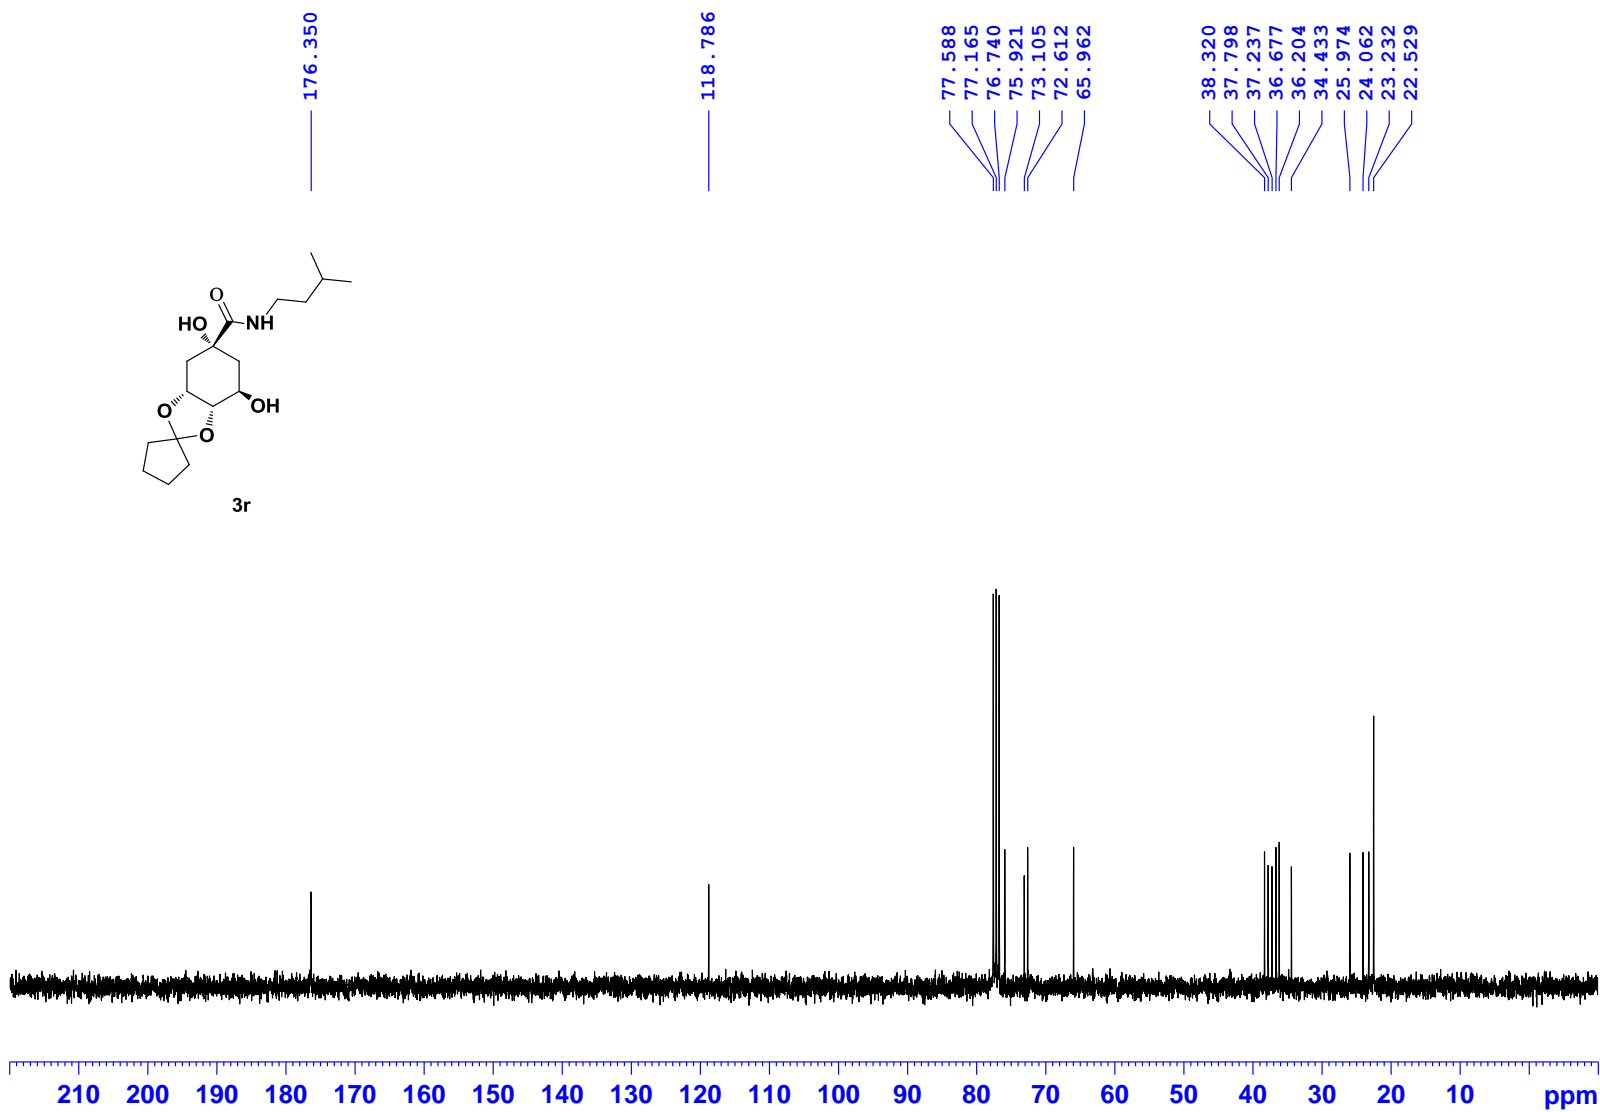

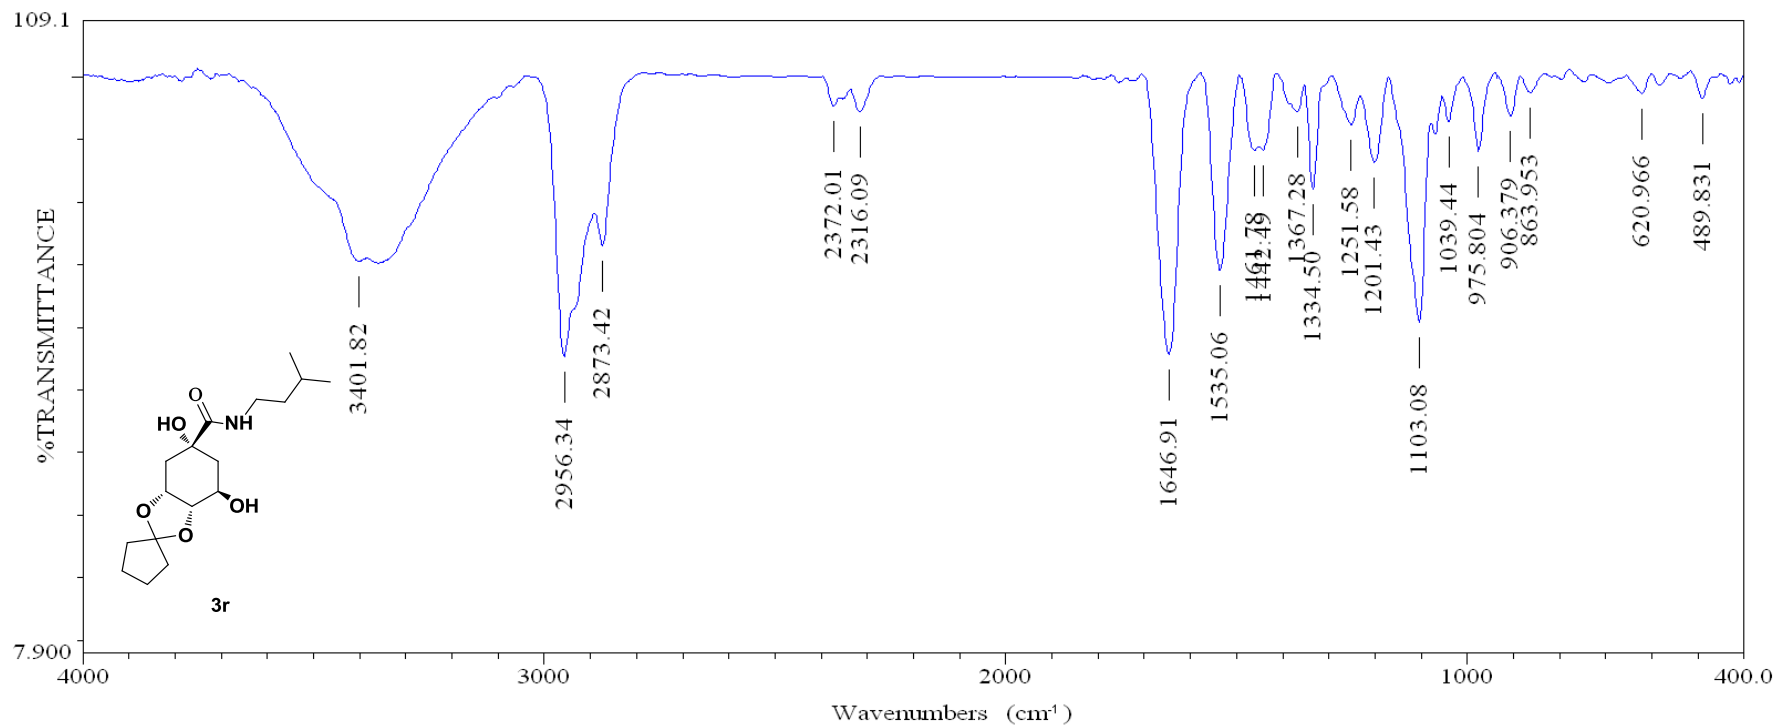

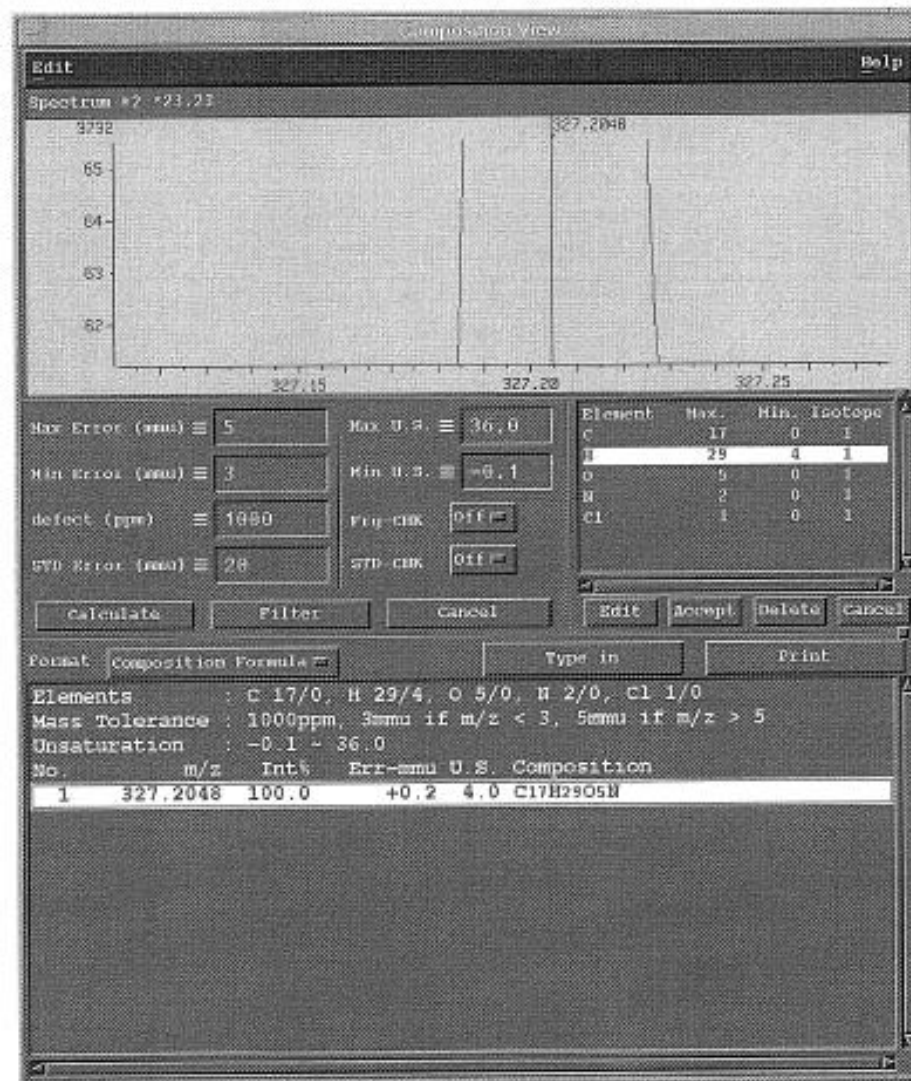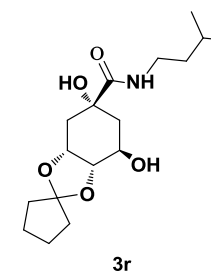

[ Elemental Composition ]

Data : 201105157

Date : 01-Jun-2011 15:11

Sample: leeut D-18

Note : -

Inlet : Direct

Ion Mode : EI+

RT : 0.46 min

Scan#: 17

Elements : C 17/0, H 29/4, O 5/0, N 2/0, Cl 1/0

Mass Tolerance : 1000ppm, 3mmu if m/z < 3, 5mmu if m/z > 5

Unsaturation (U.S.) : -0.1 - 36.0

| Observed m/z | Int%  | Err [ppm / mmu] | U.S. | Composition     |
|--------------|-------|-----------------|------|-----------------|
| 327.2048     | 100.0 | +0.6 / +0.2     | 4.0  | C 17 H 29 O 5 N |

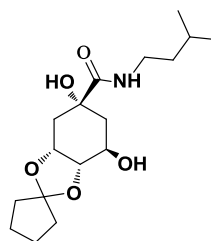

3r



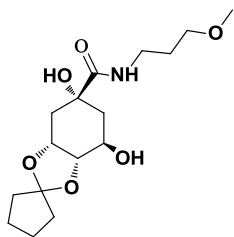

3s

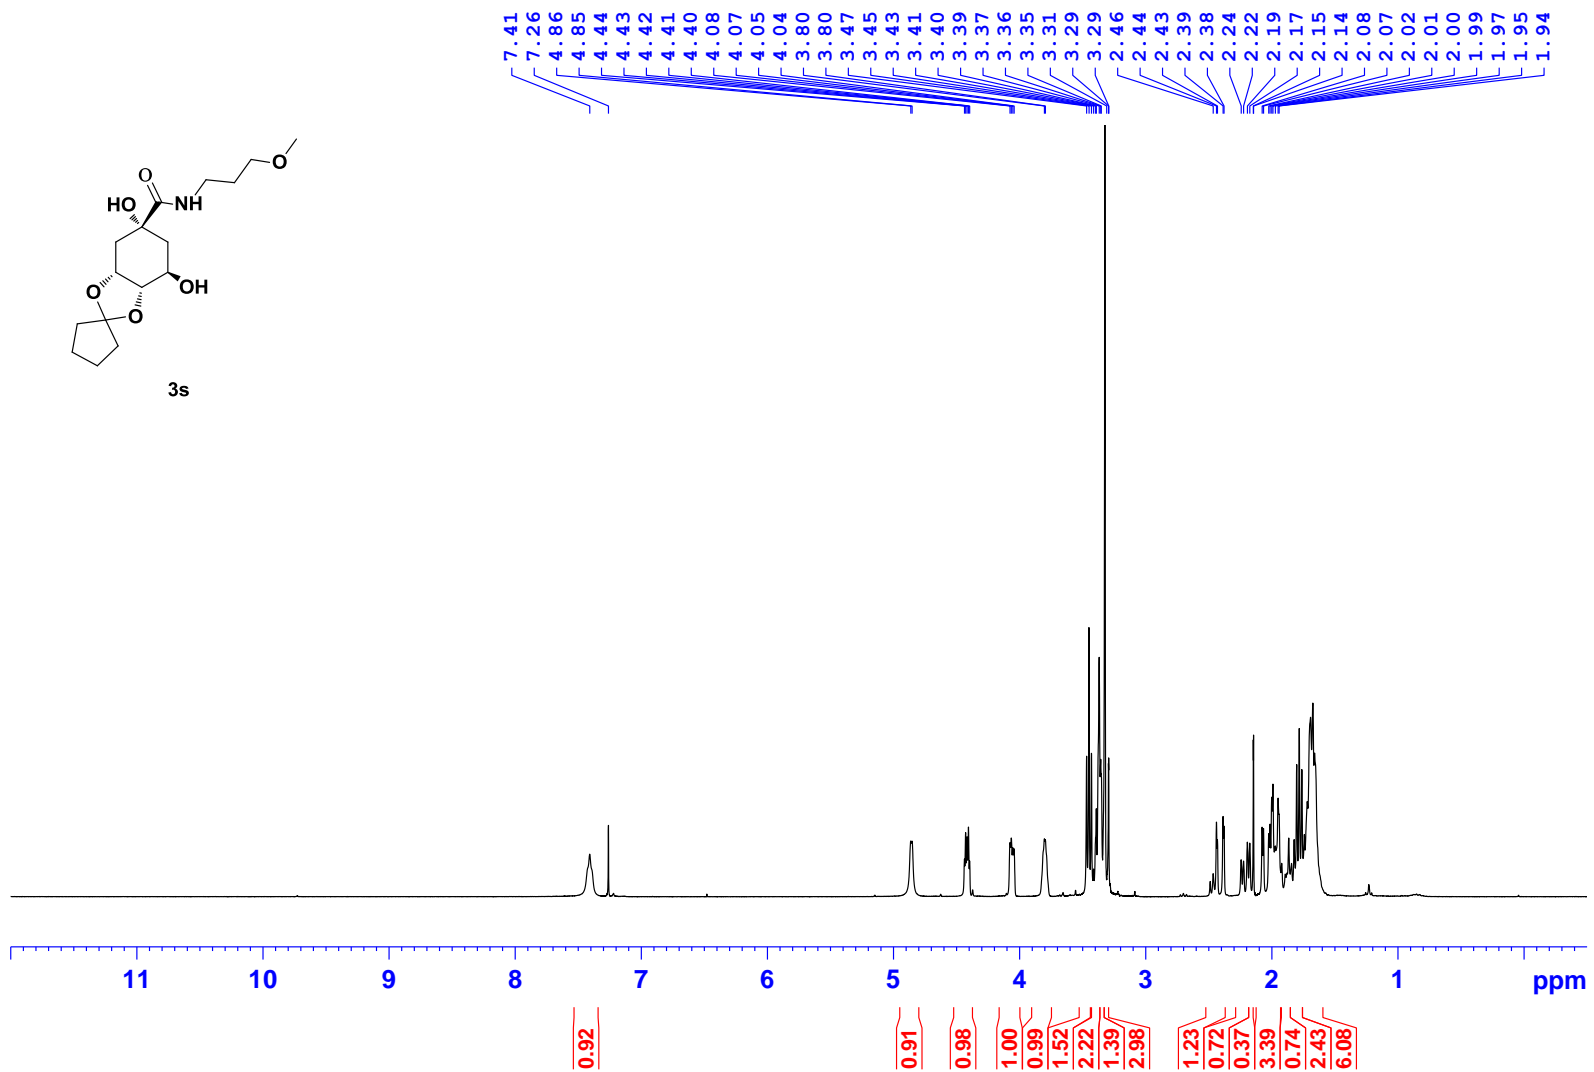

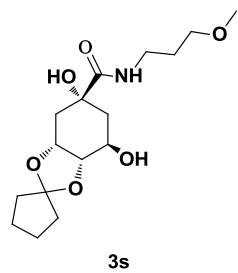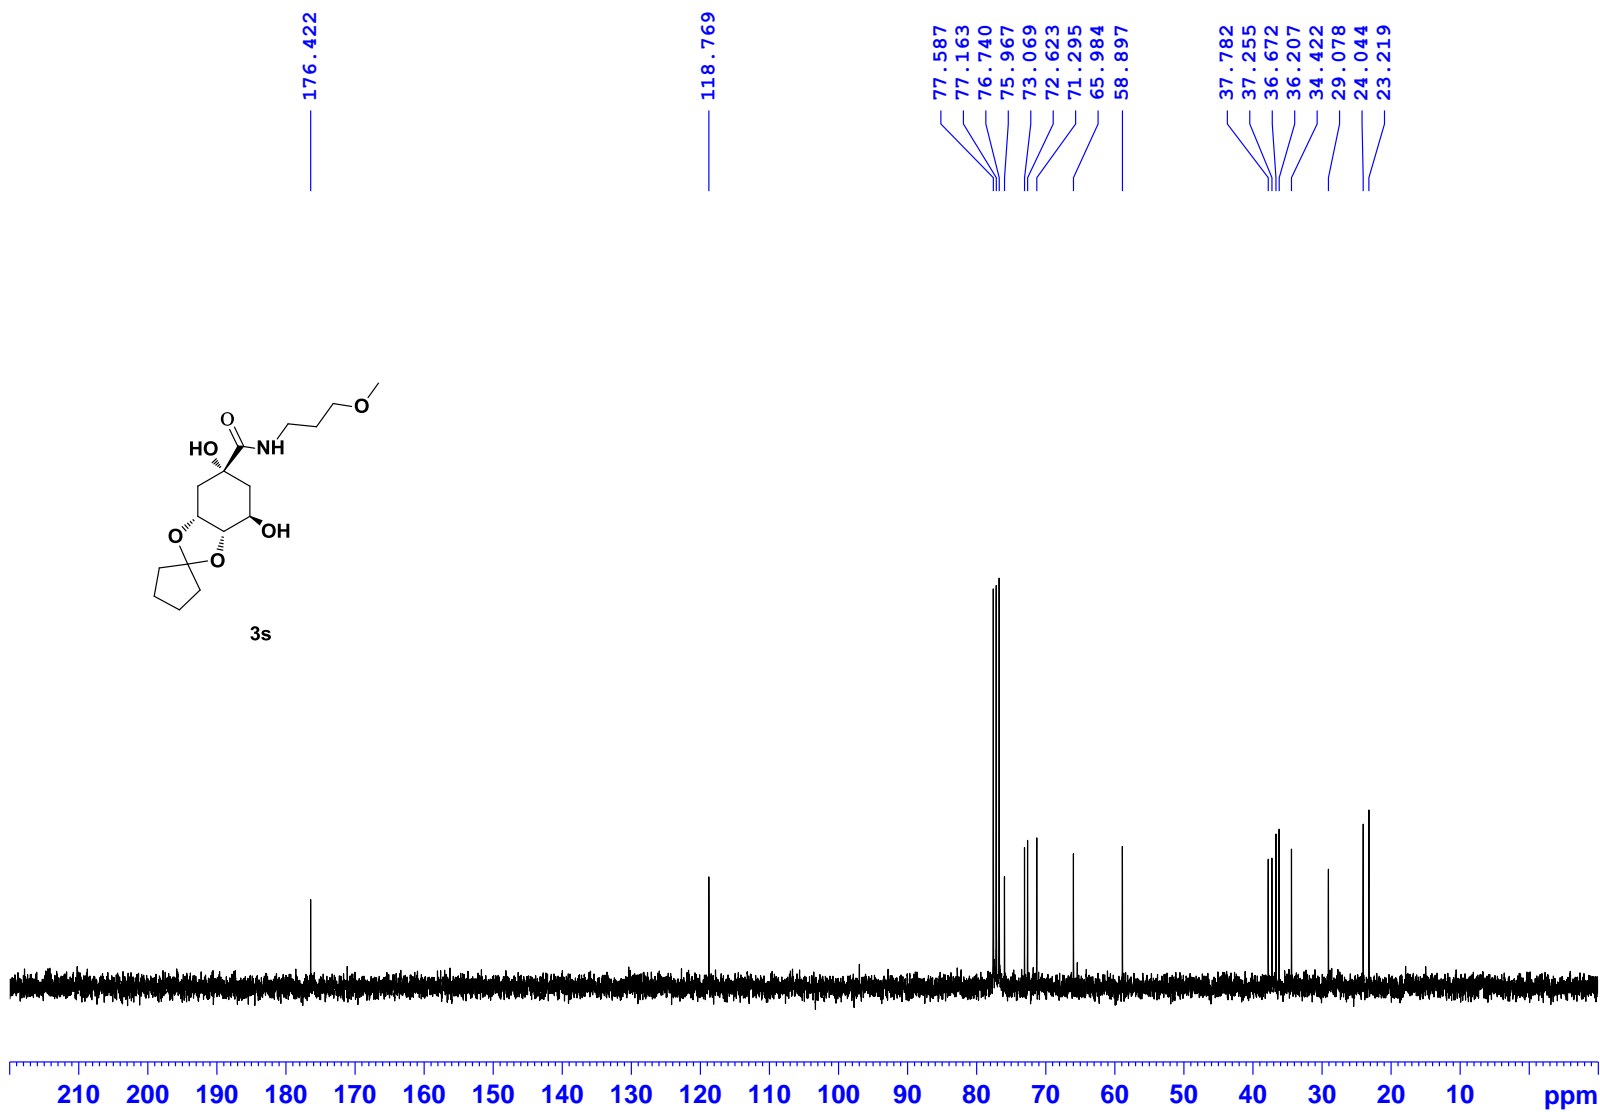

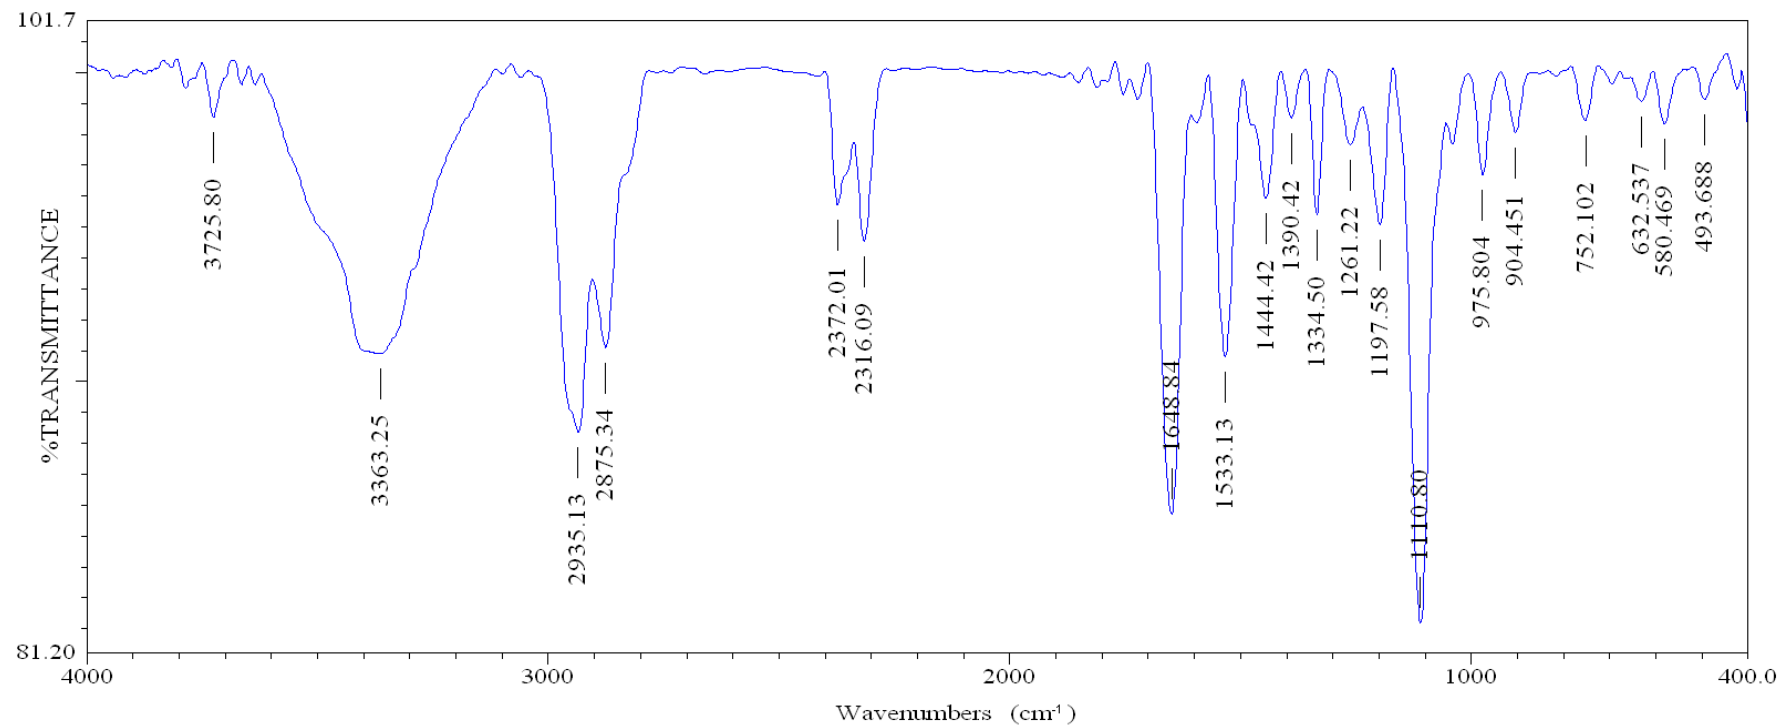

SPEC: 1e12837  
Samp: 13331eoutD19  
Mode: EI +VE +LMR BSCAN (EXP) UP LR NRM  
Oper:  
Base: 300.2  
Norm: 300.2  
Peak: 1000.00 mmu  
Data: +/5>42

01-Mar-12 REG : 00:31.7 #9  
Start : 10:05:53 212  
Inlet :  
Masses: 45 > 400  
#peaks: 354

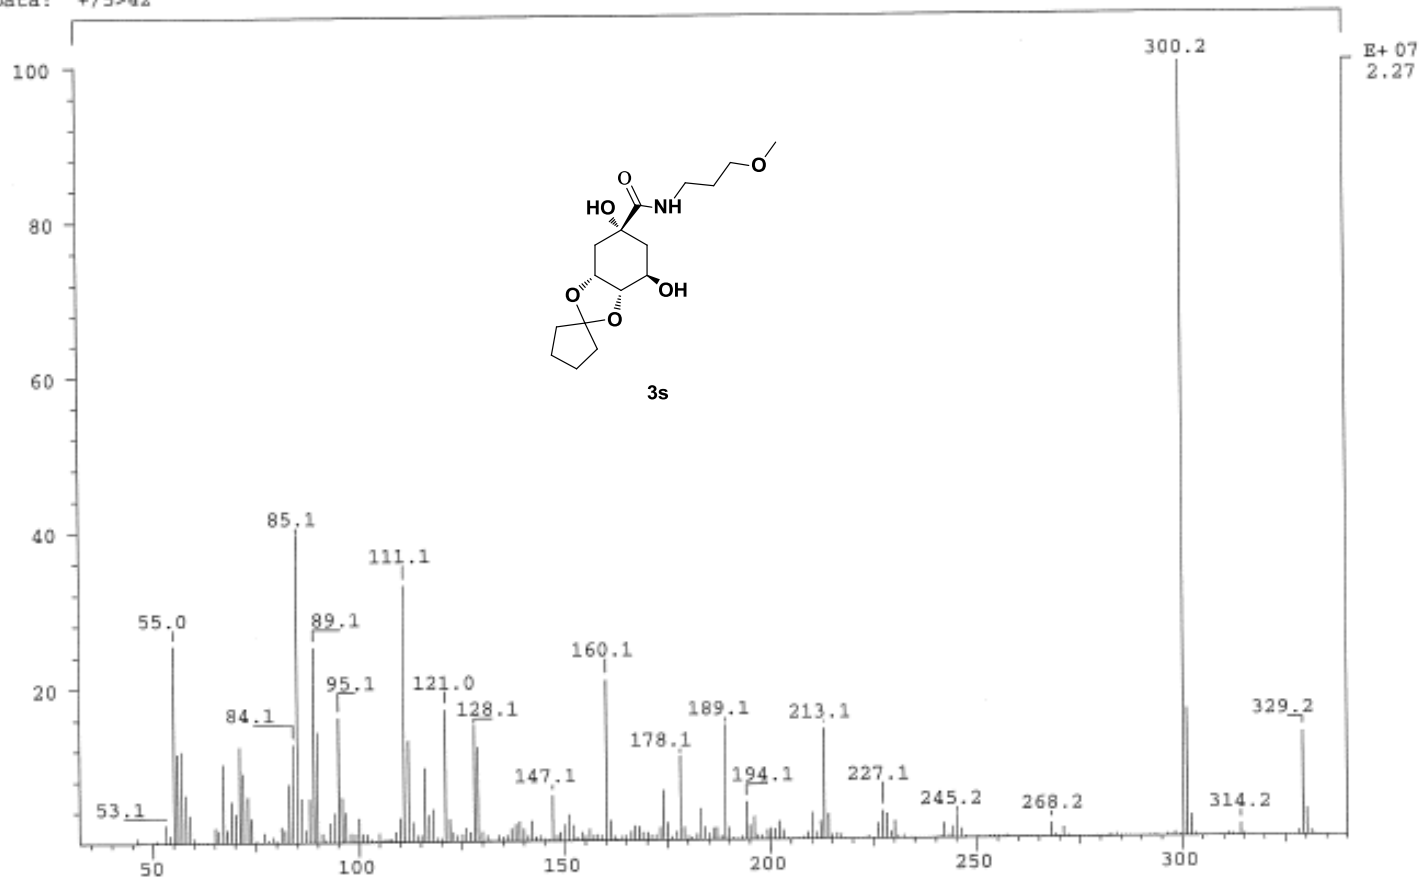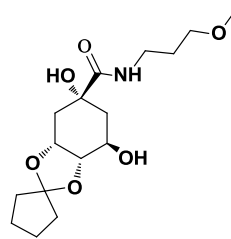

3s

E+ 07  
2.27

LIST: he11422-c3  
 Samp: 13331eeutd19  
 Mode: EI +VE +LMR ESCAN (EXP) UP HR NRM  
 Oper:  
 Limit: ( 0)  
 : (371) C19.H33.N.O6  
 Peak: 1000.00 mmu R+D: -2.0 > 60.0  
 Data: +/-1013>1340 (CMASS : converted |CMASS : converted |CMASS : con

05-Mar-12 REG : 05:38.3 #9  
 Start : 18:51:48 2225  
 Inlet :

| Mass     | Intensity | %RA   | Flags | Delta (mmu) | R+D | Composition  |
|----------|-----------|-------|-------|-------------|-----|--------------|
| 329.1829 | 48872     | 89.13 | #     | 0.9         | 4.0 | C16.H27.N.O6 |

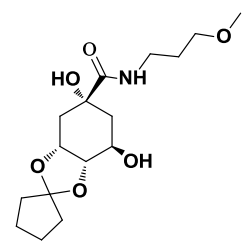

3s

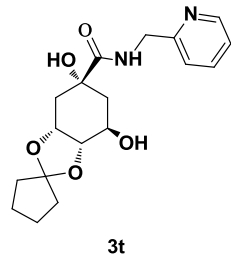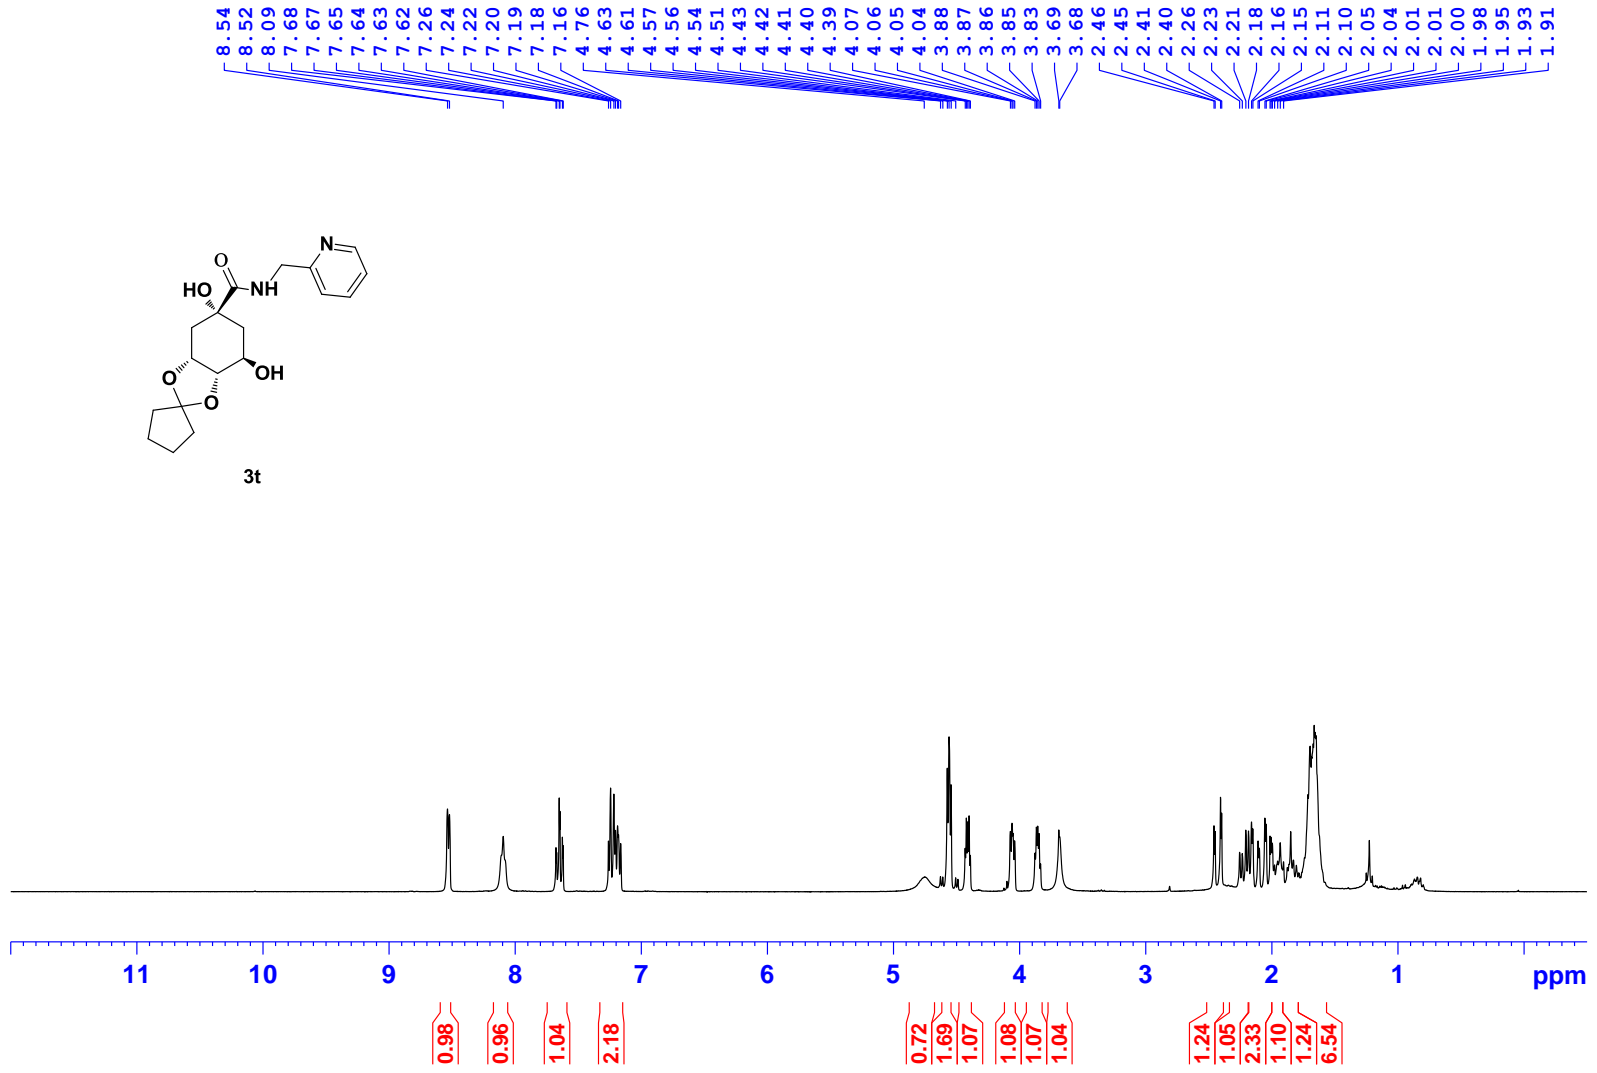

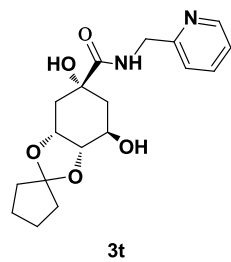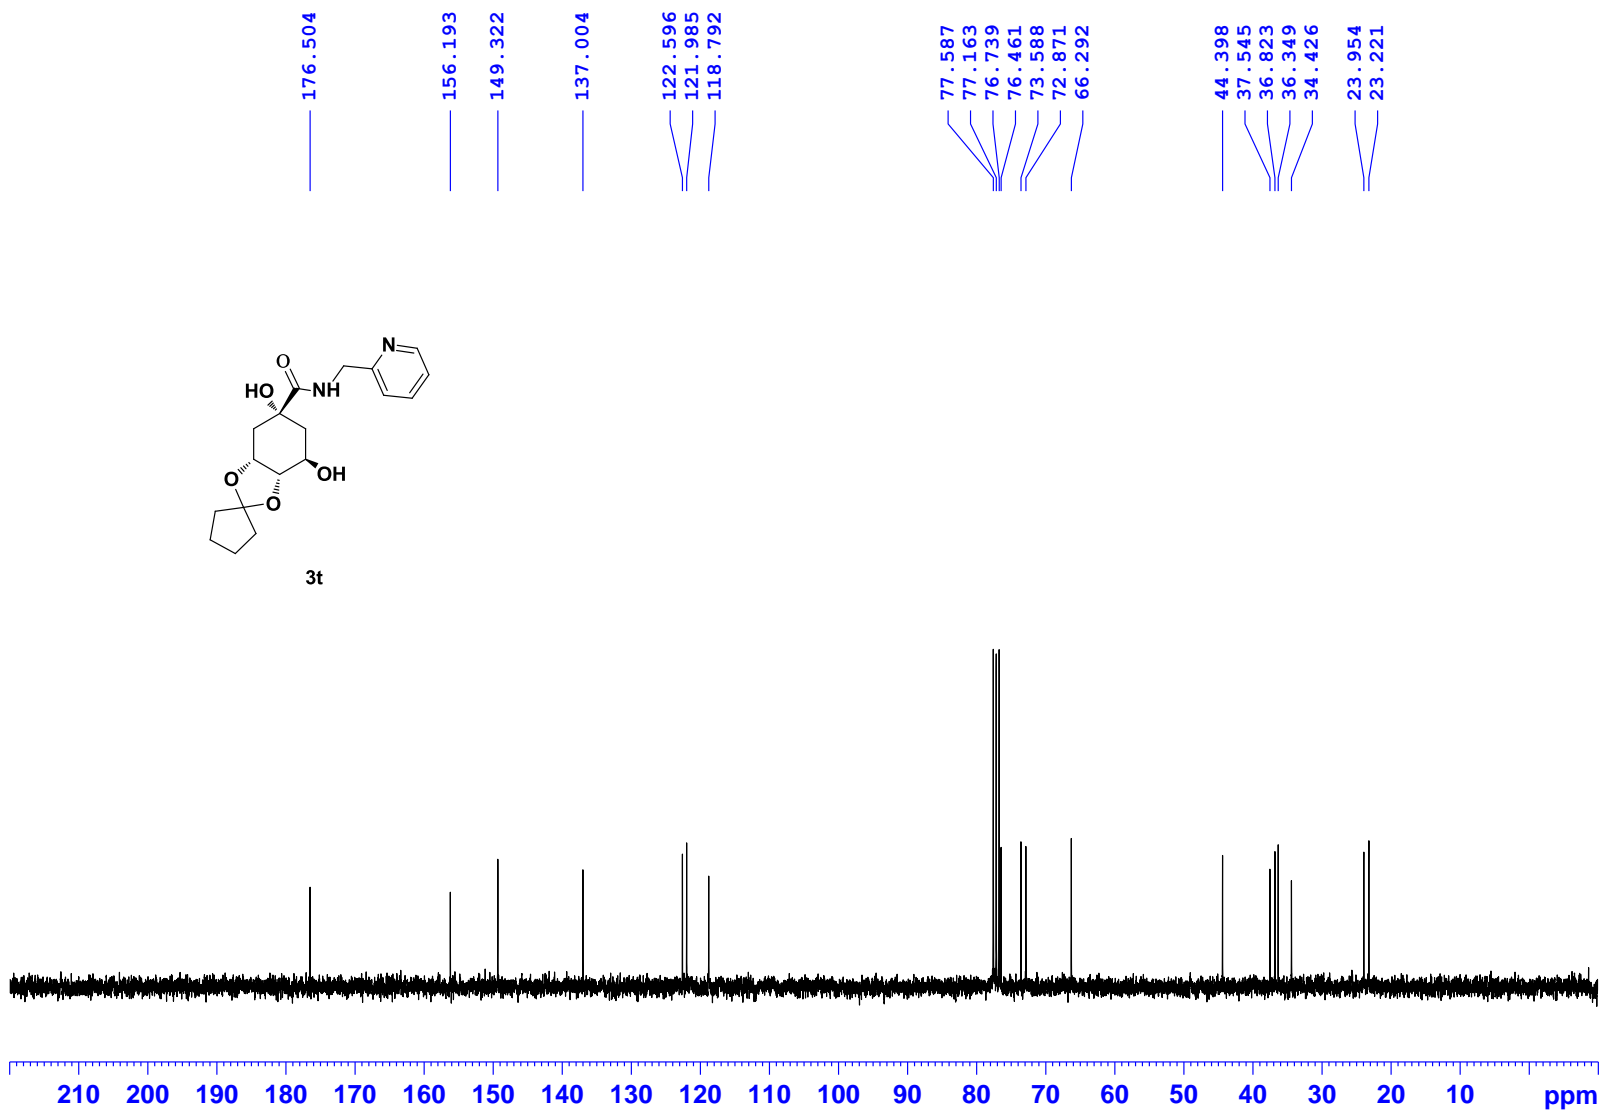

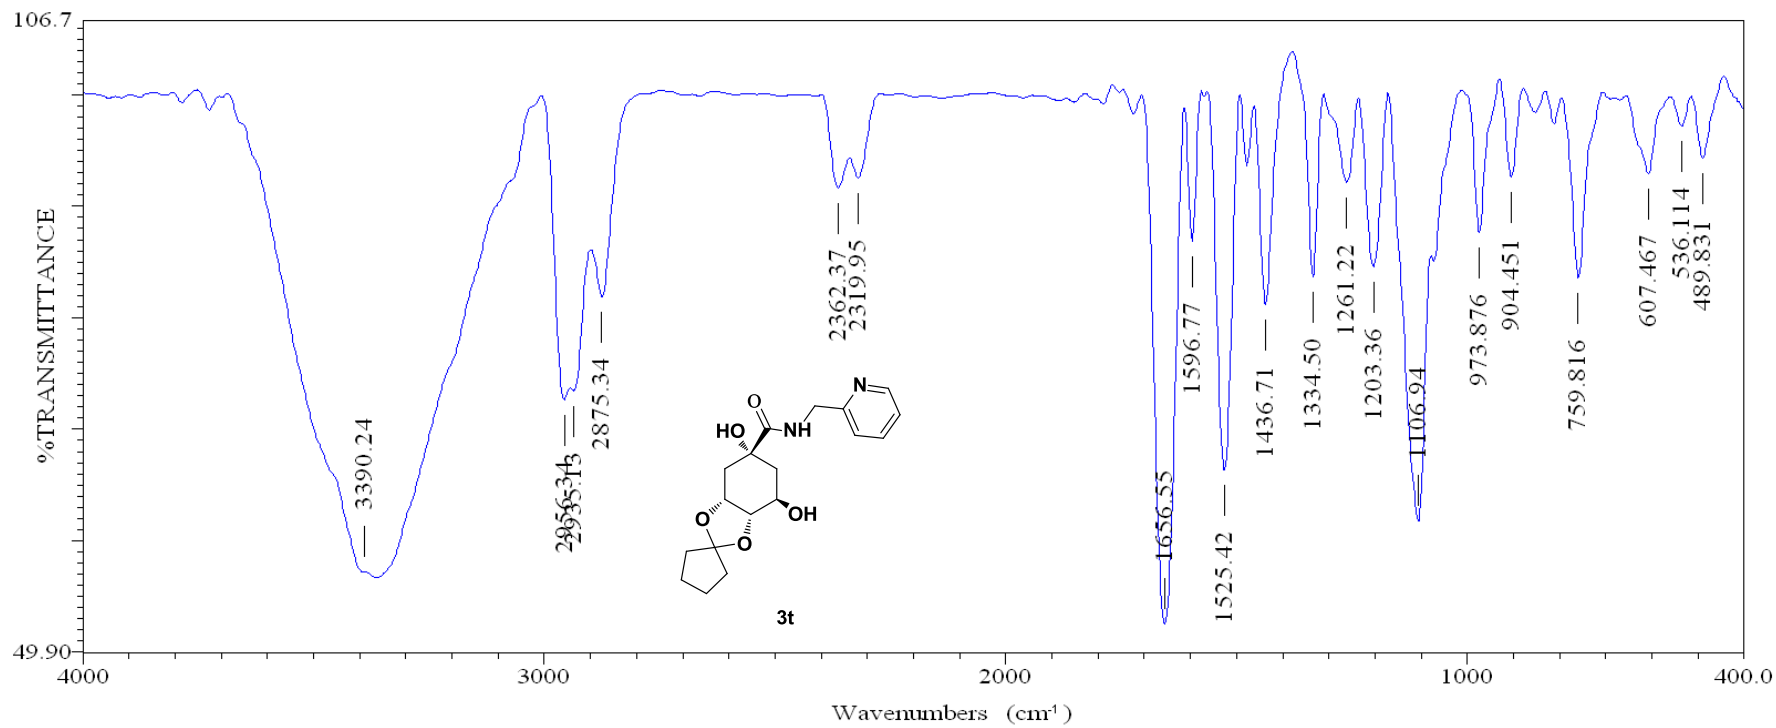



SPEC: lei5119(leeut-d20) 15-Sep-11 REG : 09:01.2 #9  
Samp: Start : 10:07:13 200  
Mode: EI +VE +LMR BSCAN (EXP) UP LR NRM  
Oper: Inlet :  
Base: 93.1 Inten : 21473074 Masses: 45 > 530  
Norm: 93.1 RIC : 121254407 #peaks: 421  
Peak: 1000.00 mmu  
Data: +/96>110

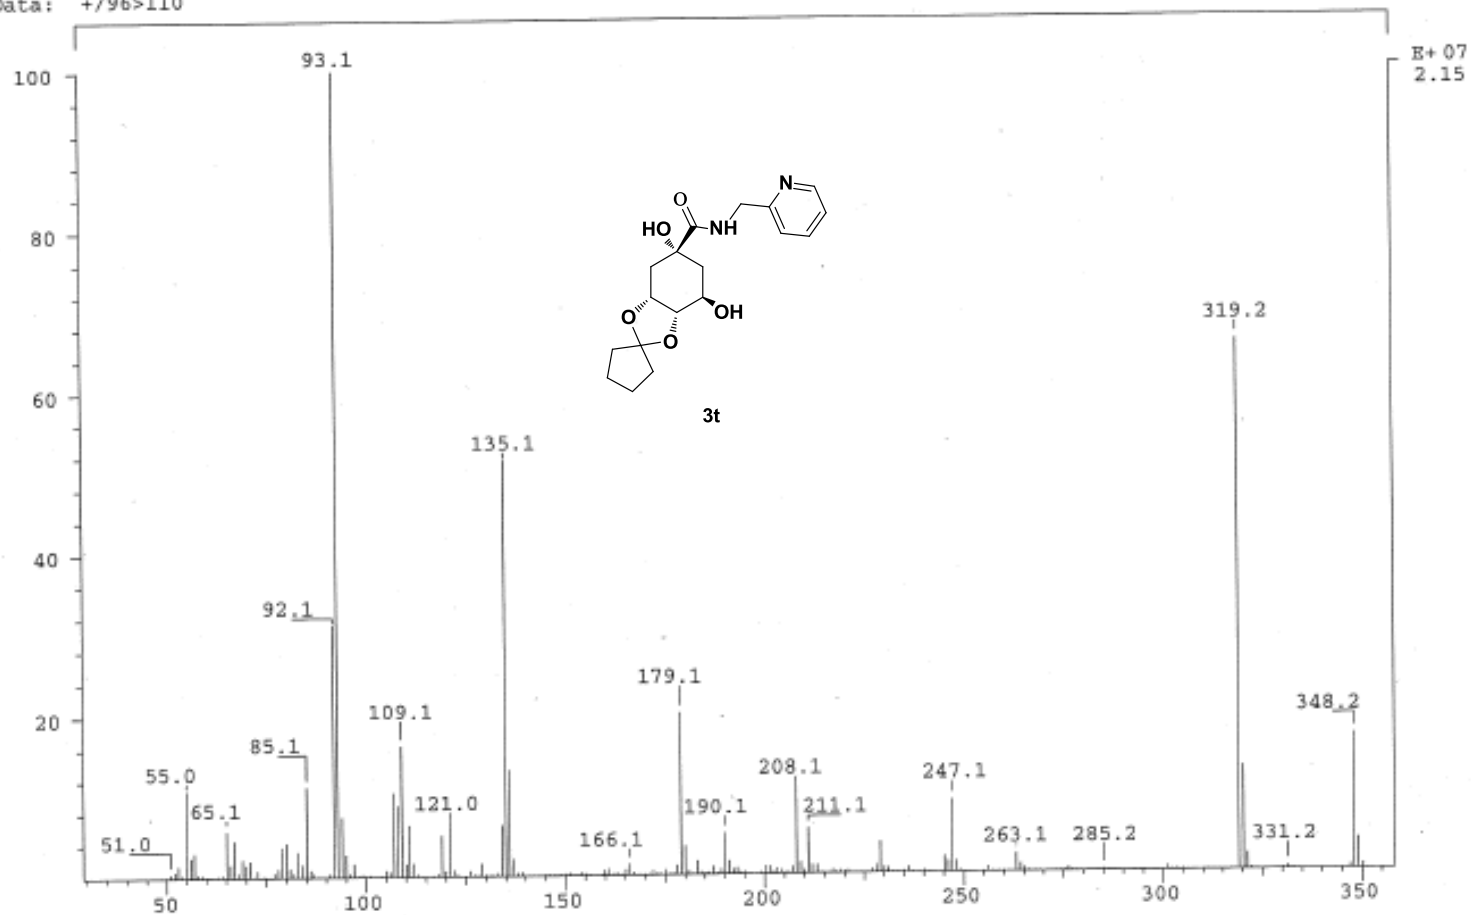



# ORTEP representation of compound 3k (cyn 1324)

CCDC number 844606

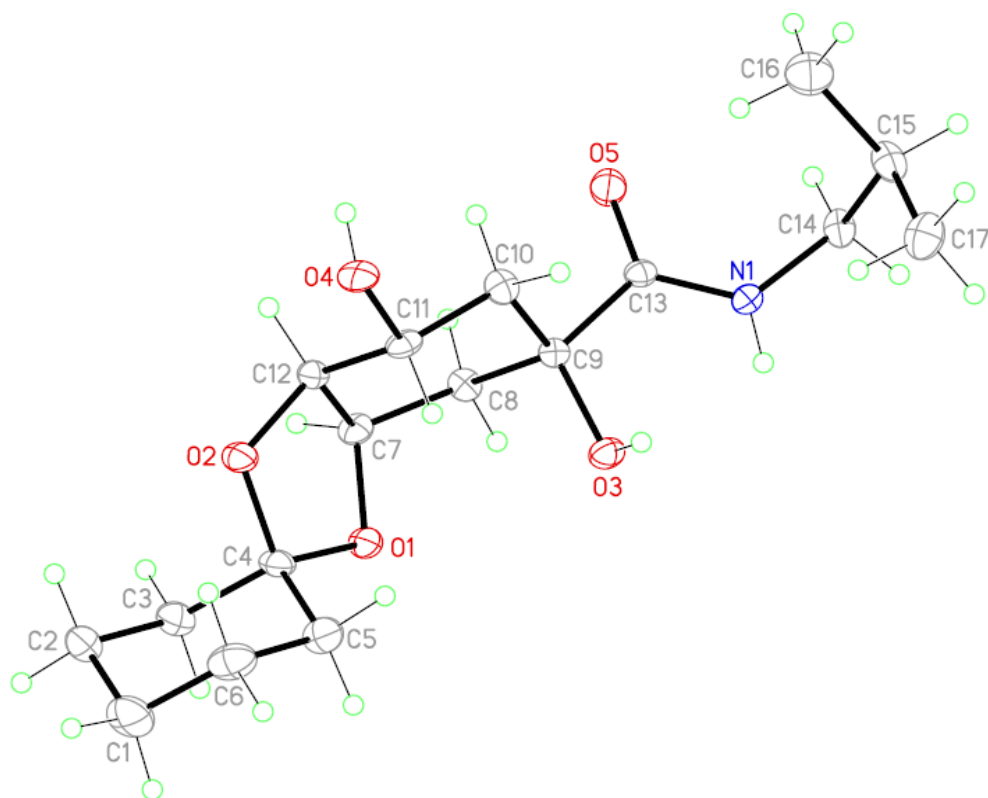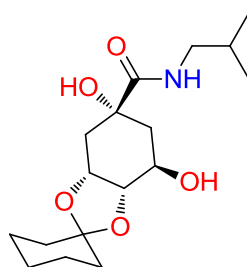

Table 1. Crystal data and structure refinement for 101129LTB.

|                                   |                                                  |                  |
|-----------------------------------|--------------------------------------------------|------------------|
| Identification code               | 101129ltb                                        |                  |
| Empirical formula                 | C <sub>17</sub> H <sub>29</sub> N O <sub>5</sub> |                  |
| Formula weight                    | 327.41                                           |                  |
| Temperature                       | 100(2) K                                         |                  |
| Wavelength                        | 0.71073 Å                                        |                  |
| Crystal system                    | Triclinic                                        |                  |
| Space group                       | P 1                                              |                  |
| Unit cell dimensions              | a = 11.0822(7) Å                                 | α = 96.815(4)°.  |
|                                   | b = 11.5824(7) Å                                 | β = 99.359(4)°.  |
|                                   | c = 15.3798(14) Å                                | γ = 115.128(3)°. |
| Volume                            | 1724.1(2) Å <sup>3</sup>                         |                  |
| Z                                 | 4                                                |                  |
| Density (calculated)              | 1.261 Mg/m <sup>3</sup>                          |                  |
| Absorption coefficient            | 0.092 mm <sup>-1</sup>                           |                  |
| F(000)                            | 712                                              |                  |
| Crystal size                      | 0.22 x 0.20 x 0.12 mm <sup>3</sup>               |                  |
| Theta range for data collection   | 1.37 to 26.47°.                                  |                  |
| Index ranges                      | -13 ≤ h ≤ 13, -14 ≤ k ≤ 13, -18 ≤ l ≤ 19         |                  |
| Reflections collected             | 28034                                            |                  |
| Independent reflections           | 12032 [R(int) = 0.1095]                          |                  |
| Completeness to theta = 26.47°    | 98.3 %                                           |                  |
| Absorption correction             | Semi-empirical from equivalents                  |                  |
| Max. and min. transmission        | 0.9486 and 0.7706                                |                  |
| Refinement method                 | Full-matrix least-squares on F <sup>2</sup>      |                  |
| Data / restraints / parameters    | 12032 / 3 / 846                                  |                  |
| Goodness-of-fit on F <sup>2</sup> | 1.069                                            |                  |
| Final R indices [I > 2σ(I)]       | R1 = 0.0599, wR2 = 0.1379                        |                  |
| R indices (all data)              | R1 = 0.0777, wR2 = 0.1859                        |                  |
| Absolute structure parameter      | -1.5(9)                                          |                  |
| Extinction coefficient            | 0.066(4)                                         |                  |
| Largest diff. peak and hole       | 0.565 and -0.510 e.Å <sup>-3</sup>               |                  |

Table 2. Atomic coordinates ( $\times 10^4$ ) and equivalent isotropic displacement parameters ( $\text{\AA}^2 \times 10^3$ )

for 101129LTB.  $U(\text{eq})$  is defined as one third of the trace of the orthogonalized  $U^{ij}$  tensor.

|       | x        | y        | z        | $U(\text{eq})$ |
|-------|----------|----------|----------|----------------|
| C(1)  | 5940(5)  | 9670(5)  | 4630(3)  | 32(1)          |
| C(2)  | 4743(5)  | 8262(5)  | 4415(3)  | 26(1)          |
| C(3)  | 4876(5)  | 7417(4)  | 3631(3)  | 23(1)          |
| C(4)  | 4929(4)  | 8016(4)  | 2788(3)  | 17(1)          |
| C(5)  | 6112(5)  | 9420(4)  | 3006(3)  | 24(1)          |
| C(6)  | 6000(5)  | 10266(4) | 3791(3)  | 26(1)          |
| C(7)  | 3756(4)  | 6466(4)  | 1478(3)  | 16(1)          |
| C(8)  | 3830(4)  | 6003(4)  | 532(3)   | 14(1)          |
| C(9)  | 4112(4)  | 6999(4)  | -77(3)   | 16(1)          |
| C(10) | 3229(4)  | 7705(4)  | 1(3)     | 17(1)          |
| C(11) | 3370(4)  | 8329(4)  | 955(3)   | 16(1)          |
| C(12) | 3070(4)  | 7367(4)  | 1570(3)  | 15(1)          |
| C(13) | 3662(4)  | 6295(4)  | -1079(3) | 14(1)          |
| C(14) | 4279(4)  | 6291(4)  | -2540(3) | 17(1)          |
| C(15) | 3972(5)  | 7208(4)  | -3078(3) | 21(1)          |
| C(16) | 2612(5)  | 7159(5)  | -3019(3) | 33(1)          |
| C(17) | 5122(5)  | 8591(4)  | -2788(3) | 27(1)          |
| C(18) | 9524(4)  | 3288(4)  | 2675(3)  | 21(1)          |
| C(19) | 10068(5) | 2844(5)  | 3478(3)  | 26(1)          |
| C(20) | 11421(5) | 3897(5)  | 4037(3)  | 31(1)          |
| C(21) | 11330(5) | 5149(5)  | 4327(3)  | 30(1)          |
| C(22) | 10809(5) | 5586(5)  | 3533(3)  | 31(1)          |
| C(23) | 9453(5)  | 4532(5)  | 2969(3)  | 28(1)          |
| C(24) | 8364(5)  | 1529(4)  | 1425(3)  | 21(1)          |
| C(25) | 7460(4)  | 1539(4)  | 556(3)   | 18(1)          |
| C(26) | 8196(4)  | 2769(4)  | 222(3)   | 18(1)          |
| C(27) | 9569(4)  | 2996(4)  | 11(3)    | 16(1)          |
| C(28) | 10267(4) | 2341(4)  | 589(3)   | 19(1)          |
| C(29) | 9905(4)  | 2209(4)  | 1487(3)  | 19(1)          |
| C(30) | 9362(4)  | 2391(4)  | -973(3)  | 16(1)          |
| C(31) | 10027(4) | 2717(4)  | -2421(3) | 17(1)          |
| C(32) | 9193(5)  | 3166(4)  | -3049(3) | 23(1)          |

|       |          |         |          |       |
|-------|----------|---------|----------|-------|
| C(33) | 7692(5)  | 2547(5) | -2986(3) | 31(1) |
| C(34) | 9327(6)  | 2883(5) | -4012(3) | 32(1) |
| C(35) | 5652(5)  | 4649(5) | 4627(3)  | 29(1) |
| C(36) | 6908(5)  | 4440(5) | 4961(3)  | 28(1) |
| C(37) | 8164(5)  | 5693(5) | 5415(3)  | 24(1) |
| C(38) | 7869(5)  | 6455(4) | 6167(3)  | 22(1) |
| C(39) | 6621(5)  | 6668(4) | 5830(3)  | 22(1) |
| C(40) | 5348(5)  | 5387(5) | 5372(3)  | 25(1) |
| C(41) | 9594(4)  | 7760(4) | 7472(3)  | 17(1) |
| C(42) | 9140(4)  | 8542(4) | 8105(3)  | 15(1) |
| C(43) | 9409(4)  | 8304(4) | 9056(3)  | 16(1) |
| C(44) | 8498(4)  | 6878(4) | 9056(3)  | 15(1) |
| C(45) | 8845(5)  | 5990(4) | 8429(3)  | 18(1) |
| C(46) | 8969(4)  | 6312(4) | 7508(3)  | 18(1) |
| C(47) | 8780(4)  | 6664(4) | 10025(3) | 16(1) |
| C(48) | 7996(5)  | 6510(4) | 11420(3) | 22(1) |
| C(49) | 8305(5)  | 7735(5) | 12077(3) | 22(1) |
| C(50) | 8317(5)  | 7421(5) | 13014(3) | 29(1) |
| C(51) | 9647(5)  | 8849(5) | 12050(3) | 34(1) |
| C(52) | 1571(5)  | 452(5)  | 4508(3)  | 33(1) |
| C(53) | 847(5)   | 715(5)  | 5203(3)  | 29(1) |
| C(54) | 1205(5)  | 259(5)  | 6065(3)  | 25(1) |
| C(55) | 2728(5)  | 858(4)  | 6449(3)  | 18(1) |
| C(56) | 3473(5)  | 629(5)  | 5752(3)  | 25(1) |
| C(57) | 3131(5)  | 1095(5) | 4903(3)  | 33(1) |
| C(58) | 4335(4)  | 1310(4) | 7729(3)  | 18(1) |
| C(59) | 4513(5)  | 1250(4) | 8712(3)  | 18(1) |
| C(60) | 3620(4)  | 1645(4) | 9221(3)  | 15(1) |
| C(61) | 3217(4)  | 2623(4) | 8790(3)  | 16(1) |
| C(62) | 4258(4)  | 3460(4) | 8302(3)  | 20(1) |
| C(63) | 4395(4)  | 2602(4) | 7523(3)  | 19(1) |
| C(64) | 4458(4)  | 2267(4) | 10190(3) | 16(1) |
| C(65) | 4951(5)  | 2018(4) | 11746(3) | 20(1) |
| C(66) | 4337(4)  | 2571(4) | 12401(3) | 20(1) |
| C(67) | 2935(5)  | 1541(5) | 12467(3) | 25(1) |
| C(68) | 4225(5)  | 3769(4) | 12174(3) | 26(1) |
| N(1)  | 4574(4)  | 6747(3) | -1569(2) | 16(1) |
| N(2)  | 10107(4) | 3129(3) | -1469(2) | 17(1) |

|       |          |         |          |       |
|-------|----------|---------|----------|-------|
| N(3)  | 7880(4)  | 6681(3) | 10490(2) | 18(1) |
| N(4)  | 4140(4)  | 1580(3) | 10813(2) | 17(1) |
| O(1)  | 5101(3)  | 7275(3) | 2061(2)  | 19(1) |
| O(2)  | 3618(3)  | 8011(3) | 2500(2)  | 18(1) |
| O(3)  | 5559(3)  | 7852(3) | 179(2)   | 18(1) |
| O(4)  | 2494(3)  | 8947(3) | 973(2)   | 19(1) |
| O(5)  | 2477(3)  | 5427(3) | -1392(2) | 22(1) |
| O(6)  | 8206(3)  | 2299(3) | 2174(2)  | 26(1) |
| O(7)  | 10369(3) | 3478(3) | 2044(2)  | 20(1) |
| O(8)  | 7039(3)  | 366(3)  | -89(2)   | 23(1) |
| O(9)  | 10505(3) | 4359(3) | 185(2)   | 18(1) |
| O(10) | 8532(3)  | 1210(3) | -1280(2) | 20(1) |
| O(11) | 7640(3)  | 5800(3) | 6899(2)  | 19(1) |
| O(12) | 9049(3)  | 7698(3) | 6541(2)  | 22(1) |
| O(13) | 9925(3)  | 9884(3) | 8097(2)  | 19(1) |
| O(14) | 7134(3)  | 6683(3) | 8771(2)  | 18(1) |
| O(15) | 9804(3)  | 6515(3) | 10326(2) | 22(1) |
| O(16) | 3006(3)  | 373(3)  | 7225(2)  | 21(1) |
| O(17) | 3233(3)  | 2235(3) | 6784(2)  | 22(1) |
| O(18) | 2415(3)  | 540(3)  | 9262(2)  | 25(1) |
| O(19) | 5582(3)  | 4249(3) | 8877(2)  | 30(1) |
| O(20) | 5456(3)  | 3397(3) | 10364(2) | 23(1) |

---

Table 3. Bond lengths [ $\text{\AA}$ ] and angles [ $^\circ$ ] for 101129LTB.

---

|              |          |
|--------------|----------|
| C(1)-C(6)    | 1.533(7) |
| C(1)-C(2)    | 1.556(7) |
| C(1)-H(1A)   | 0.9900   |
| C(1)-H(1B)   | 0.9900   |
| C(2)-C(3)    | 1.528(7) |
| C(2)-H(2A)   | 0.9900   |
| C(2)-H(2B)   | 0.9900   |
| C(3)-C(4)    | 1.538(6) |
| C(3)-H(3A)   | 0.9900   |
| C(3)-H(3B)   | 0.9900   |
| C(4)-O(1)    | 1.416(5) |
| C(4)-O(2)    | 1.446(5) |
| C(4)-C(5)    | 1.547(6) |
| C(5)-C(6)    | 1.518(6) |
| C(5)-H(5A)   | 0.9900   |
| C(5)-H(5B)   | 0.9900   |
| C(6)-H(6A)   | 0.9900   |
| C(6)-H(6B)   | 0.9900   |
| C(7)-O(1)    | 1.444(5) |
| C(7)-C(8)    | 1.516(6) |
| C(7)-C(12)   | 1.536(6) |
| C(7)-H(7)    | 1.0000   |
| C(8)-C(9)    | 1.534(5) |
| C(8)-H(8A)   | 0.9900   |
| C(8)-H(8B)   | 0.9900   |
| C(9)-O(3)    | 1.435(5) |
| C(9)-C(10)   | 1.527(6) |
| C(9)-C(13)   | 1.549(6) |
| C(10)-C(11)  | 1.510(6) |
| C(10)-H(10A) | 0.9900   |
| C(10)-H(10B) | 0.9900   |
| C(11)-O(4)   | 1.432(5) |
| C(11)-C(12)  | 1.512(5) |
| C(11)-H(11)  | 1.0000   |
| C(12)-O(2)   | 1.431(5) |
| C(12)-H(12)  | 1.0000   |



|              |          |
|--------------|----------|
| C(13)-O(5)   | 1.235(5) |
| C(13)-N(1)   | 1.324(5) |
| C(14)-N(1)   | 1.458(5) |
| C(14)-C(15)  | 1.533(5) |
| C(14)-H(14A) | 0.9900   |
| C(14)-H(14B) | 0.9900   |
| C(15)-C(16)  | 1.501(7) |
| C(15)-C(17)  | 1.517(6) |
| C(15)-H(15)  | 1.0000   |
| C(16)-H(16A) | 0.9800   |
| C(16)-H(16B) | 0.9800   |
| C(16)-H(16C) | 0.9800   |
| C(17)-H(17A) | 0.9800   |
| C(17)-H(17B) | 0.9800   |
| C(17)-H(17C) | 0.9800   |
| C(18)-O(7)   | 1.428(5) |
| C(18)-O(6)   | 1.430(5) |
| C(18)-C(23)  | 1.497(7) |
| C(18)-C(19)  | 1.525(6) |
| C(19)-C(20)  | 1.502(7) |
| C(19)-H(19A) | 0.9900   |
| C(19)-H(19B) | 0.9900   |
| C(20)-C(21)  | 1.515(7) |
| C(20)-H(20A) | 0.9900   |
| C(20)-H(20B) | 0.9900   |
| C(21)-C(22)  | 1.498(7) |
| C(21)-H(21A) | 0.9900   |
| C(21)-H(21B) | 0.9900   |
| C(22)-C(23)  | 1.506(7) |
| C(22)-H(22A) | 0.9900   |
| C(22)-H(22B) | 0.9900   |
| C(23)-H(23A) | 0.9900   |
| C(23)-H(23B) | 0.9900   |
| C(24)-O(6)   | 1.451(5) |
| C(24)-C(29)  | 1.527(6) |
| C(24)-C(25)  | 1.539(6) |
| C(24)-H(24)  | 1.0000   |
| C(25)-O(8)   | 1.428(5) |

|              |          |
|--------------|----------|
| C(25)-C(26)  | 1.511(5) |
| C(25)-H(25)  | 1.0000   |
| C(26)-C(27)  | 1.526(6) |
| C(26)-H(26A) | 0.9900   |
| C(26)-H(26B) | 0.9900   |
| C(27)-O(9)   | 1.435(5) |
| C(27)-C(30)  | 1.528(6) |
| C(27)-C(28)  | 1.550(6) |
| C(28)-C(29)  | 1.507(6) |
| C(28)-H(28A) | 0.9900   |
| C(28)-H(28B) | 0.9900   |
| C(29)-O(7)   | 1.440(5) |
| C(29)-H(29)  | 1.0000   |
| C(30)-O(10)  | 1.255(5) |
| C(30)-N(2)   | 1.324(5) |
| C(31)-N(2)   | 1.461(5) |
| C(31)-C(32)  | 1.516(6) |
| C(31)-H(31A) | 0.9900   |
| C(31)-H(31B) | 0.9900   |
| C(32)-C(34)  | 1.524(7) |
| C(32)-C(33)  | 1.532(7) |
| C(32)-H(32)  | 1.0000   |
| C(33)-H(33A) | 0.9800   |
| C(33)-H(33B) | 0.9800   |
| C(33)-H(33C) | 0.9800   |
| C(34)-H(34A) | 0.9800   |
| C(34)-H(34B) | 0.9800   |
| C(34)-H(34C) | 0.9800   |
| C(35)-C(40)  | 1.516(7) |
| C(35)-C(36)  | 1.530(7) |
| C(35)-H(35A) | 0.9900   |
| C(35)-H(35B) | 0.9900   |
| C(36)-C(37)  | 1.503(7) |
| C(36)-H(36A) | 0.9900   |
| C(36)-H(36B) | 0.9900   |
| C(37)-C(38)  | 1.533(6) |
| C(37)-H(37A) | 0.9900   |
| C(37)-H(37B) | 0.9900   |

|              |          |
|--------------|----------|
| C(38)-O(11)  | 1.428(5) |
| C(38)-O(12)  | 1.440(5) |
| C(38)-C(39)  | 1.526(7) |
| C(39)-C(40)  | 1.529(6) |
| C(39)-H(39A) | 0.9900   |
| C(39)-H(39B) | 0.9900   |
| C(40)-H(40A) | 0.9900   |
| C(40)-H(40B) | 0.9900   |
| C(41)-O(12)  | 1.441(5) |
| C(41)-C(46)  | 1.531(6) |
| C(41)-C(42)  | 1.536(6) |
| C(41)-H(41)  | 1.0000   |
| C(42)-O(13)  | 1.427(4) |
| C(42)-C(43)  | 1.526(5) |
| C(42)-H(42)  | 1.0000   |
| C(43)-C(44)  | 1.527(5) |
| C(43)-H(43A) | 0.9900   |
| C(43)-H(43B) | 0.9900   |
| C(44)-O(14)  | 1.414(5) |
| C(44)-C(45)  | 1.536(6) |
| C(44)-C(47)  | 1.544(6) |
| C(45)-C(46)  | 1.520(6) |
| C(45)-H(45A) | 0.9900   |
| C(45)-H(45B) | 0.9900   |
| C(46)-O(11)  | 1.441(5) |
| C(46)-H(46)  | 1.0000   |
| C(47)-O(15)  | 1.243(5) |
| C(47)-N(3)   | 1.322(5) |
| C(48)-N(3)   | 1.460(5) |
| C(48)-C(49)  | 1.513(6) |
| C(48)-H(48A) | 0.9900   |
| C(48)-H(48B) | 0.9900   |
| C(49)-C(51)  | 1.510(7) |
| C(49)-C(50)  | 1.526(6) |
| C(49)-H(49)  | 1.0000   |
| C(50)-H(50A) | 0.9800   |
| C(50)-H(50B) | 0.9800   |
| C(50)-H(50C) | 0.9800   |

|              |          |
|--------------|----------|
| C(51)-H(51A) | 0.9800   |
| C(51)-H(51B) | 0.9800   |
| C(51)-H(51C) | 0.9800   |
| C(52)-C(53)  | 1.513(7) |
| C(52)-C(57)  | 1.539(7) |
| C(52)-H(52A) | 0.9900   |
| C(52)-H(52B) | 0.9900   |
| C(53)-C(54)  | 1.539(6) |
| C(53)-H(53A) | 0.9900   |
| C(53)-H(53B) | 0.9900   |
| C(54)-C(55)  | 1.504(6) |
| C(54)-H(54A) | 0.9900   |
| C(54)-H(54B) | 0.9900   |
| C(55)-O(16)  | 1.421(5) |
| C(55)-O(17)  | 1.441(5) |
| C(55)-C(56)  | 1.520(6) |
| C(56)-C(57)  | 1.524(7) |
| C(56)-H(56A) | 0.9900   |
| C(56)-H(56B) | 0.9900   |
| C(57)-H(57A) | 0.9900   |
| C(57)-H(57B) | 0.9900   |
| C(58)-O(16)  | 1.421(5) |
| C(58)-C(59)  | 1.506(6) |
| C(58)-C(63)  | 1.544(6) |
| C(58)-H(58)  | 1.0000   |
| C(59)-C(60)  | 1.534(6) |
| C(59)-H(59A) | 0.9900   |
| C(59)-H(59B) | 0.9900   |
| C(60)-O(18)  | 1.422(5) |
| C(60)-C(64)  | 1.526(6) |
| C(60)-C(61)  | 1.560(6) |
| C(61)-C(62)  | 1.529(6) |
| C(61)-H(61A) | 0.9900   |
| C(61)-H(61B) | 0.9900   |
| C(62)-O(19)  | 1.421(5) |
| C(62)-C(63)  | 1.533(6) |
| C(62)-H(62)  | 1.0000   |
| C(63)-O(17)  | 1.439(5) |

|                  |          |
|------------------|----------|
| C(63)-H(63)      | 1.0000   |
| C(64)-O(20)      | 1.264(5) |
| C(64)-N(4)       | 1.315(5) |
| C(65)-N(4)       | 1.465(5) |
| C(65)-C(66)      | 1.525(6) |
| C(65)-H(65A)     | 0.9900   |
| C(65)-H(65B)     | 0.9900   |
| C(66)-C(68)      | 1.520(6) |
| C(66)-C(67)      | 1.534(6) |
| C(66)-H(66)      | 1.0000   |
| C(67)-H(67A)     | 0.9800   |
| C(67)-H(67B)     | 0.9800   |
| C(67)-H(67C)     | 0.9800   |
| C(68)-H(68A)     | 0.9800   |
| C(68)-H(68B)     | 0.9800   |
| C(68)-H(68C)     | 0.9800   |
| N(1)-H(1N)       | 0.8800   |
| N(2)-H(2N)       | 0.8800   |
| N(3)-H(3N)       | 0.8800   |
| N(4)-H(4N)       | 0.8800   |
| O(3)-H(3)        | 0.8400   |
| O(4)-H(4)        | 0.8400   |
| O(8)-H(8)        | 0.8400   |
| O(9)-H(9)        | 0.8400   |
| O(13)-H(13)      | 0.8400   |
| O(14)-H(14)      | 0.8400   |
| O(18)-H(18)      | 0.8400   |
| O(19)-H(19)      | 0.8400   |
| <br>             |          |
| C(6)-C(1)-C(2)   | 110.9(4) |
| C(6)-C(1)-H(1A)  | 109.5    |
| C(2)-C(1)-H(1A)  | 109.5    |
| C(6)-C(1)-H(1B)  | 109.5    |
| C(2)-C(1)-H(1B)  | 109.5    |
| H(1A)-C(1)-H(1B) | 108.0    |
| C(3)-C(2)-C(1)   | 110.3(4) |
| C(3)-C(2)-H(2A)  | 109.6    |
| C(1)-C(2)-H(2A)  | 109.6    |

|                  |          |
|------------------|----------|
| C(3)-C(2)-H(2B)  | 109.6    |
| C(1)-C(2)-H(2B)  | 109.6    |
| H(2A)-C(2)-H(2B) | 108.1    |
| C(2)-C(3)-C(4)   | 111.6(4) |
| C(2)-C(3)-H(3A)  | 109.3    |
| C(4)-C(3)-H(3A)  | 109.3    |
| C(2)-C(3)-H(3B)  | 109.3    |
| C(4)-C(3)-H(3B)  | 109.3    |
| H(3A)-C(3)-H(3B) | 108.0    |
| O(1)-C(4)-O(2)   | 107.1(3) |
| O(1)-C(4)-C(3)   | 112.7(3) |
| O(2)-C(4)-C(3)   | 106.9(3) |
| O(1)-C(4)-C(5)   | 108.5(3) |
| O(2)-C(4)-C(5)   | 110.8(3) |
| C(3)-C(4)-C(5)   | 110.7(3) |
| C(6)-C(5)-C(4)   | 111.3(4) |
| C(6)-C(5)-H(5A)  | 109.4    |
| C(4)-C(5)-H(5A)  | 109.4    |
| C(6)-C(5)-H(5B)  | 109.4    |
| C(4)-C(5)-H(5B)  | 109.4    |
| H(5A)-C(5)-H(5B) | 108.0    |
| C(5)-C(6)-C(1)   | 111.9(4) |
| C(5)-C(6)-H(6A)  | 109.2    |
| C(1)-C(6)-H(6A)  | 109.2    |
| C(5)-C(6)-H(6B)  | 109.2    |
| C(1)-C(6)-H(6B)  | 109.2    |
| H(6A)-C(6)-H(6B) | 107.9    |
| O(1)-C(7)-C(8)   | 112.0(3) |
| O(1)-C(7)-C(12)  | 101.3(3) |
| C(8)-C(7)-C(12)  | 116.3(3) |
| O(1)-C(7)-H(7)   | 109.0    |
| C(8)-C(7)-H(7)   | 109.0    |
| C(12)-C(7)-H(7)  | 109.0    |
| C(7)-C(8)-C(9)   | 116.2(3) |
| C(7)-C(8)-H(8A)  | 108.2    |
| C(9)-C(8)-H(8A)  | 108.2    |
| C(7)-C(8)-H(8B)  | 108.2    |
| C(9)-C(8)-H(8B)  | 108.2    |

|                     |          |
|---------------------|----------|
| H(8A)-C(8)-H(8B)    | 107.4    |
| O(3)-C(9)-C(10)     | 113.7(3) |
| O(3)-C(9)-C(8)      | 106.8(3) |
| C(10)-C(9)-C(8)     | 110.4(3) |
| O(3)-C(9)-C(13)     | 111.0(3) |
| C(10)-C(9)-C(13)    | 104.8(3) |
| C(8)-C(9)-C(13)     | 110.3(3) |
| C(11)-C(10)-C(9)    | 114.0(3) |
| C(11)-C(10)-H(10A)  | 108.8    |
| C(9)-C(10)-H(10A)   | 108.8    |
| C(11)-C(10)-H(10B)  | 108.8    |
| C(9)-C(10)-H(10B)   | 108.8    |
| H(10A)-C(10)-H(10B) | 107.6    |
| O(4)-C(11)-C(10)    | 110.6(3) |
| O(4)-C(11)-C(12)    | 109.8(3) |
| C(10)-C(11)-C(12)   | 112.5(3) |
| O(4)-C(11)-H(11)    | 107.9    |
| C(10)-C(11)-H(11)   | 107.9    |
| C(12)-C(11)-H(11)   | 107.9    |
| O(2)-C(12)-C(11)    | 111.7(3) |
| O(2)-C(12)-C(7)     | 102.2(3) |
| C(11)-C(12)-C(7)    | 114.4(3) |
| O(2)-C(12)-H(12)    | 109.4    |
| C(11)-C(12)-H(12)   | 109.4    |
| C(7)-C(12)-H(12)    | 109.4    |
| O(5)-C(13)-N(1)     | 123.8(4) |
| O(5)-C(13)-C(9)     | 119.7(3) |
| N(1)-C(13)-C(9)     | 116.2(3) |
| N(1)-C(14)-C(15)    | 112.8(3) |
| N(1)-C(14)-H(14A)   | 109.0    |
| C(15)-C(14)-H(14A)  | 109.0    |
| N(1)-C(14)-H(14B)   | 109.0    |
| C(15)-C(14)-H(14B)  | 109.0    |
| H(14A)-C(14)-H(14B) | 107.8    |
| C(16)-C(15)-C(17)   | 111.6(4) |
| C(16)-C(15)-C(14)   | 111.2(4) |
| C(17)-C(15)-C(14)   | 111.5(4) |
| C(16)-C(15)-H(15)   | 107.4    |

|                     |          |
|---------------------|----------|
| C(17)-C(15)-H(15)   | 107.4    |
| C(14)-C(15)-H(15)   | 107.4    |
| C(15)-C(16)-H(16A)  | 109.5    |
| C(15)-C(16)-H(16B)  | 109.5    |
| H(16A)-C(16)-H(16B) | 109.5    |
| C(15)-C(16)-H(16C)  | 109.5    |
| H(16A)-C(16)-H(16C) | 109.5    |
| H(16B)-C(16)-H(16C) | 109.5    |
| C(15)-C(17)-H(17A)  | 109.5    |
| C(15)-C(17)-H(17B)  | 109.5    |
| H(17A)-C(17)-H(17B) | 109.5    |
| C(15)-C(17)-H(17C)  | 109.5    |
| H(17A)-C(17)-H(17C) | 109.5    |
| H(17B)-C(17)-H(17C) | 109.5    |
| O(7)-C(18)-O(6)     | 104.3(3) |
| O(7)-C(18)-C(23)    | 108.8(4) |
| O(6)-C(18)-C(23)    | 110.2(4) |
| O(7)-C(18)-C(19)    | 111.1(4) |
| O(6)-C(18)-C(19)    | 110.9(3) |
| C(23)-C(18)-C(19)   | 111.3(4) |
| C(20)-C(19)-C(18)   | 111.6(4) |
| C(20)-C(19)-H(19A)  | 109.3    |
| C(18)-C(19)-H(19A)  | 109.3    |
| C(20)-C(19)-H(19B)  | 109.3    |
| C(18)-C(19)-H(19B)  | 109.3    |
| H(19A)-C(19)-H(19B) | 108.0    |
| C(19)-C(20)-C(21)   | 111.2(4) |
| C(19)-C(20)-H(20A)  | 109.4    |
| C(21)-C(20)-H(20A)  | 109.4    |
| C(19)-C(20)-H(20B)  | 109.4    |
| C(21)-C(20)-H(20B)  | 109.4    |
| H(20A)-C(20)-H(20B) | 108.0    |
| C(22)-C(21)-C(20)   | 111.4(4) |
| C(22)-C(21)-H(21A)  | 109.3    |
| C(20)-C(21)-H(21A)  | 109.3    |
| C(22)-C(21)-H(21B)  | 109.3    |
| C(20)-C(21)-H(21B)  | 109.3    |
| H(21A)-C(21)-H(21B) | 108.0    |



|                     |          |
|---------------------|----------|
| C(21)-C(22)-C(23)   | 111.5(4) |
| C(21)-C(22)-H(22A)  | 109.3    |
| C(23)-C(22)-H(22A)  | 109.3    |
| C(21)-C(22)-H(22B)  | 109.3    |
| C(23)-C(22)-H(22B)  | 109.3    |
| H(22A)-C(22)-H(22B) | 108.0    |
| C(18)-C(23)-C(22)   | 111.9(4) |
| C(18)-C(23)-H(23A)  | 109.2    |
| C(22)-C(23)-H(23A)  | 109.2    |
| C(18)-C(23)-H(23B)  | 109.2    |
| C(22)-C(23)-H(23B)  | 109.2    |
| H(23A)-C(23)-H(23B) | 107.9    |
| O(6)-C(24)-C(29)    | 103.3(3) |
| O(6)-C(24)-C(25)    | 107.8(3) |
| C(29)-C(24)-C(25)   | 115.0(4) |
| O(6)-C(24)-H(24)    | 110.2    |
| C(29)-C(24)-H(24)   | 110.2    |
| C(25)-C(24)-H(24)   | 110.2    |
| O(8)-C(25)-C(26)    | 114.0(3) |
| O(8)-C(25)-C(24)    | 109.3(4) |
| C(26)-C(25)-C(24)   | 110.3(3) |
| O(8)-C(25)-H(25)    | 107.7    |
| C(26)-C(25)-H(25)   | 107.7    |
| C(24)-C(25)-H(25)   | 107.7    |
| C(25)-C(26)-C(27)   | 116.0(3) |
| C(25)-C(26)-H(26A)  | 108.3    |
| C(27)-C(26)-H(26A)  | 108.3    |
| C(25)-C(26)-H(26B)  | 108.3    |
| C(27)-C(26)-H(26B)  | 108.3    |
| H(26A)-C(26)-H(26B) | 107.4    |
| O(9)-C(27)-C(26)    | 111.8(3) |
| O(9)-C(27)-C(30)    | 109.1(3) |
| C(26)-C(27)-C(30)   | 110.6(3) |
| O(9)-C(27)-C(28)    | 107.5(3) |
| C(26)-C(27)-C(28)   | 111.3(3) |
| C(30)-C(27)-C(28)   | 106.5(3) |
| C(29)-C(28)-C(27)   | 114.7(4) |
| C(29)-C(28)-H(28A)  | 108.6    |

|                     |          |
|---------------------|----------|
| C(27)-C(28)-H(28A)  | 108.6    |
| C(29)-C(28)-H(28B)  | 108.6    |
| C(27)-C(28)-H(28B)  | 108.6    |
| H(28A)-C(28)-H(28B) | 107.6    |
| O(7)-C(29)-C(28)    | 110.2(3) |
| O(7)-C(29)-C(24)    | 104.2(3) |
| C(28)-C(29)-C(24)   | 113.9(4) |
| O(7)-C(29)-H(29)    | 109.5    |
| C(28)-C(29)-H(29)   | 109.5    |
| C(24)-C(29)-H(29)   | 109.5    |
| O(10)-C(30)-N(2)    | 122.0(4) |
| O(10)-C(30)-C(27)   | 119.6(4) |
| N(2)-C(30)-C(27)    | 118.3(4) |
| N(2)-C(31)-C(32)    | 113.5(4) |
| N(2)-C(31)-H(31A)   | 108.9    |
| C(32)-C(31)-H(31A)  | 108.9    |
| N(2)-C(31)-H(31B)   | 108.9    |
| C(32)-C(31)-H(31B)  | 108.9    |
| H(31A)-C(31)-H(31B) | 107.7    |
| C(31)-C(32)-C(34)   | 110.7(4) |
| C(31)-C(32)-C(33)   | 110.8(4) |
| C(34)-C(32)-C(33)   | 111.8(4) |
| C(31)-C(32)-H(32)   | 107.8    |
| C(34)-C(32)-H(32)   | 107.8    |
| C(33)-C(32)-H(32)   | 107.8    |
| C(32)-C(33)-H(33A)  | 109.5    |
| C(32)-C(33)-H(33B)  | 109.5    |
| H(33A)-C(33)-H(33B) | 109.5    |
| C(32)-C(33)-H(33C)  | 109.5    |
| H(33A)-C(33)-H(33C) | 109.5    |
| H(33B)-C(33)-H(33C) | 109.5    |
| C(32)-C(34)-H(34A)  | 109.5    |
| C(32)-C(34)-H(34B)  | 109.5    |
| H(34A)-C(34)-H(34B) | 109.5    |
| C(32)-C(34)-H(34C)  | 109.5    |
| H(34A)-C(34)-H(34C) | 109.5    |
| H(34B)-C(34)-H(34C) | 109.5    |
| C(40)-C(35)-C(36)   | 112.3(4) |

|                     |          |
|---------------------|----------|
| C(40)-C(35)-H(35A)  | 109.1    |
| C(36)-C(35)-H(35A)  | 109.1    |
| C(40)-C(35)-H(35B)  | 109.1    |
| C(36)-C(35)-H(35B)  | 109.1    |
| H(35A)-C(35)-H(35B) | 107.9    |
| C(37)-C(36)-C(35)   | 112.7(4) |
| C(37)-C(36)-H(36A)  | 109.0    |
| C(35)-C(36)-H(36A)  | 109.0    |
| C(37)-C(36)-H(36B)  | 109.0    |
| C(35)-C(36)-H(36B)  | 109.0    |
| H(36A)-C(36)-H(36B) | 107.8    |
| C(36)-C(37)-C(38)   | 110.8(4) |
| C(36)-C(37)-H(37A)  | 109.5    |
| C(38)-C(37)-H(37A)  | 109.5    |
| C(36)-C(37)-H(37B)  | 109.5    |
| C(38)-C(37)-H(37B)  | 109.5    |
| H(37A)-C(37)-H(37B) | 108.1    |
| O(11)-C(38)-O(12)   | 105.7(3) |
| O(11)-C(38)-C(39)   | 108.3(4) |
| O(12)-C(38)-C(39)   | 109.4(4) |
| O(11)-C(38)-C(37)   | 111.4(3) |
| O(12)-C(38)-C(37)   | 109.7(4) |
| C(39)-C(38)-C(37)   | 112.1(3) |
| C(38)-C(39)-C(40)   | 112.1(4) |
| C(38)-C(39)-H(39A)  | 109.2    |
| C(40)-C(39)-H(39A)  | 109.2    |
| C(38)-C(39)-H(39B)  | 109.2    |
| C(40)-C(39)-H(39B)  | 109.2    |
| H(39A)-C(39)-H(39B) | 107.9    |
| C(35)-C(40)-C(39)   | 110.2(4) |
| C(35)-C(40)-H(40A)  | 109.6    |
| C(39)-C(40)-H(40A)  | 109.6    |
| C(35)-C(40)-H(40B)  | 109.6    |
| C(39)-C(40)-H(40B)  | 109.6    |
| H(40A)-C(40)-H(40B) | 108.1    |
| O(12)-C(41)-C(46)   | 101.3(3) |
| O(12)-C(41)-C(42)   | 111.1(3) |
| C(46)-C(41)-C(42)   | 112.7(3) |

|                     |          |
|---------------------|----------|
| O(12)-C(41)-H(41)   | 110.5    |
| C(46)-C(41)-H(41)   | 110.5    |
| C(42)-C(41)-H(41)   | 110.5    |
| O(13)-C(42)-C(43)   | 110.4(3) |
| O(13)-C(42)-C(41)   | 106.9(3) |
| C(43)-C(42)-C(41)   | 109.9(3) |
| O(13)-C(42)-H(42)   | 109.8    |
| C(43)-C(42)-H(42)   | 109.8    |
| C(41)-C(42)-H(42)   | 109.8    |
| C(42)-C(43)-C(44)   | 109.3(3) |
| C(42)-C(43)-H(43A)  | 109.8    |
| C(44)-C(43)-H(43A)  | 109.8    |
| C(42)-C(43)-H(43B)  | 109.8    |
| C(44)-C(43)-H(43B)  | 109.8    |
| H(43A)-C(43)-H(43B) | 108.3    |
| O(14)-C(44)-C(43)   | 105.7(3) |
| O(14)-C(44)-C(45)   | 112.7(3) |
| C(43)-C(44)-C(45)   | 109.7(3) |
| O(14)-C(44)-C(47)   | 111.0(3) |
| C(43)-C(44)-C(47)   | 108.4(3) |
| C(45)-C(44)-C(47)   | 109.1(3) |
| C(46)-C(45)-C(44)   | 115.8(3) |
| C(46)-C(45)-H(45A)  | 108.3    |
| C(44)-C(45)-H(45A)  | 108.3    |
| C(46)-C(45)-H(45B)  | 108.3    |
| C(44)-C(45)-H(45B)  | 108.3    |
| H(45A)-C(45)-H(45B) | 107.4    |
| O(11)-C(46)-C(45)   | 111.3(3) |
| O(11)-C(46)-C(41)   | 102.1(3) |
| C(45)-C(46)-C(41)   | 116.4(3) |
| O(11)-C(46)-H(46)   | 108.9    |
| C(45)-C(46)-H(46)   | 108.9    |
| C(41)-C(46)-H(46)   | 108.9    |
| O(15)-C(47)-N(3)    | 124.5(4) |
| O(15)-C(47)-C(44)   | 120.5(4) |
| N(3)-C(47)-C(44)    | 115.0(4) |
| N(3)-C(48)-C(49)    | 112.4(4) |
| N(3)-C(48)-H(48A)   | 109.1    |

|                     |          |
|---------------------|----------|
| C(49)-C(48)-H(48A)  | 109.1    |
| N(3)-C(48)-H(48B)   | 109.1    |
| C(49)-C(48)-H(48B)  | 109.1    |
| H(48A)-C(48)-H(48B) | 107.9    |
| C(51)-C(49)-C(48)   | 111.2(4) |
| C(51)-C(49)-C(50)   | 111.9(4) |
| C(48)-C(49)-C(50)   | 107.9(4) |
| C(51)-C(49)-H(49)   | 108.6    |
| C(48)-C(49)-H(49)   | 108.6    |
| C(50)-C(49)-H(49)   | 108.6    |
| C(49)-C(50)-H(50A)  | 109.5    |
| C(49)-C(50)-H(50B)  | 109.5    |
| H(50A)-C(50)-H(50B) | 109.5    |
| C(49)-C(50)-H(50C)  | 109.5    |
| H(50A)-C(50)-H(50C) | 109.5    |
| H(50B)-C(50)-H(50C) | 109.5    |
| C(49)-C(51)-H(51A)  | 109.5    |
| C(49)-C(51)-H(51B)  | 109.5    |
| H(51A)-C(51)-H(51B) | 109.5    |
| C(49)-C(51)-H(51C)  | 109.5    |
| H(51A)-C(51)-H(51C) | 109.5    |
| H(51B)-C(51)-H(51C) | 109.5    |
| C(53)-C(52)-C(57)   | 110.6(4) |
| C(53)-C(52)-H(52A)  | 109.5    |
| C(57)-C(52)-H(52A)  | 109.5    |
| C(53)-C(52)-H(52B)  | 109.5    |
| C(57)-C(52)-H(52B)  | 109.5    |
| H(52A)-C(52)-H(52B) | 108.1    |
| C(52)-C(53)-C(54)   | 110.9(4) |
| C(52)-C(53)-H(53A)  | 109.5    |
| C(54)-C(53)-H(53A)  | 109.5    |
| C(52)-C(53)-H(53B)  | 109.5    |
| C(54)-C(53)-H(53B)  | 109.5    |
| H(53A)-C(53)-H(53B) | 108.1    |
| C(55)-C(54)-C(53)   | 112.2(4) |
| C(55)-C(54)-H(54A)  | 109.2    |
| C(53)-C(54)-H(54A)  | 109.2    |
| C(55)-C(54)-H(54B)  | 109.2    |

|                     |          |
|---------------------|----------|
| C(53)-C(54)-H(54B)  | 109.2    |
| H(54A)-C(54)-H(54B) | 107.9    |
| O(16)-C(55)-O(17)   | 104.4(3) |
| O(16)-C(55)-C(54)   | 110.0(3) |
| O(17)-C(55)-C(54)   | 108.8(4) |
| O(16)-C(55)-C(56)   | 111.3(4) |
| O(17)-C(55)-C(56)   | 110.4(4) |
| C(54)-C(55)-C(56)   | 111.7(3) |
| C(55)-C(56)-C(57)   | 111.5(4) |
| C(55)-C(56)-H(56A)  | 109.3    |
| C(57)-C(56)-H(56A)  | 109.3    |
| C(55)-C(56)-H(56B)  | 109.3    |
| C(57)-C(56)-H(56B)  | 109.3    |
| H(56A)-C(56)-H(56B) | 108.0    |
| C(56)-C(57)-C(52)   | 111.0(4) |
| C(56)-C(57)-H(57A)  | 109.4    |
| C(52)-C(57)-H(57A)  | 109.4    |
| C(56)-C(57)-H(57B)  | 109.4    |
| C(52)-C(57)-H(57B)  | 109.4    |
| H(57A)-C(57)-H(57B) | 108.0    |
| O(16)-C(58)-C(59)   | 111.0(3) |
| O(16)-C(58)-C(63)   | 102.6(3) |
| C(59)-C(58)-C(63)   | 114.7(3) |
| O(16)-C(58)-H(58)   | 109.5    |
| C(59)-C(58)-H(58)   | 109.5    |
| C(63)-C(58)-H(58)   | 109.5    |
| C(58)-C(59)-C(60)   | 116.5(4) |
| C(58)-C(59)-H(59A)  | 108.2    |
| C(60)-C(59)-H(59A)  | 108.2    |
| C(58)-C(59)-H(59B)  | 108.2    |
| C(60)-C(59)-H(59B)  | 108.2    |
| H(59A)-C(59)-H(59B) | 107.3    |
| O(18)-C(60)-C(64)   | 106.6(3) |
| O(18)-C(60)-C(59)   | 111.6(3) |
| C(64)-C(60)-C(59)   | 106.7(3) |
| O(18)-C(60)-C(61)   | 109.6(3) |
| C(64)-C(60)-C(61)   | 110.5(3) |
| C(59)-C(60)-C(61)   | 111.7(3) |

|                     |          |
|---------------------|----------|
| C(62)-C(61)-C(60)   | 113.7(4) |
| C(62)-C(61)-H(61A)  | 108.8    |
| C(60)-C(61)-H(61A)  | 108.8    |
| C(62)-C(61)-H(61B)  | 108.8    |
| C(60)-C(61)-H(61B)  | 108.8    |
| H(61A)-C(61)-H(61B) | 107.7    |
| O(19)-C(62)-C(61)   | 113.2(3) |
| O(19)-C(62)-C(63)   | 108.4(4) |
| C(61)-C(62)-C(63)   | 110.7(3) |
| O(19)-C(62)-H(62)   | 108.2    |
| C(61)-C(62)-H(62)   | 108.2    |
| C(63)-C(62)-H(62)   | 108.2    |
| O(17)-C(63)-C(62)   | 107.3(3) |
| O(17)-C(63)-C(58)   | 105.7(3) |
| C(62)-C(63)-C(58)   | 114.2(3) |
| O(17)-C(63)-H(63)   | 109.9    |
| C(62)-C(63)-H(63)   | 109.9    |
| C(58)-C(63)-H(63)   | 109.9    |
| O(20)-C(64)-N(4)    | 122.2(4) |
| O(20)-C(64)-C(60)   | 119.6(3) |
| N(4)-C(64)-C(60)    | 118.2(4) |
| N(4)-C(65)-C(66)    | 113.8(4) |
| N(4)-C(65)-H(65A)   | 108.8    |
| C(66)-C(65)-H(65A)  | 108.8    |
| N(4)-C(65)-H(65B)   | 108.8    |
| C(66)-C(65)-H(65B)  | 108.8    |
| H(65A)-C(65)-H(65B) | 107.7    |
| C(68)-C(66)-C(65)   | 112.8(3) |
| C(68)-C(66)-C(67)   | 110.0(4) |
| C(65)-C(66)-C(67)   | 112.0(4) |
| C(68)-C(66)-H(66)   | 107.3    |
| C(65)-C(66)-H(66)   | 107.3    |
| C(67)-C(66)-H(66)   | 107.3    |
| C(66)-C(67)-H(67A)  | 109.5    |
| C(66)-C(67)-H(67B)  | 109.5    |
| H(67A)-C(67)-H(67B) | 109.5    |
| C(66)-C(67)-H(67C)  | 109.5    |
| H(67A)-C(67)-H(67C) | 109.5    |

|                     |          |
|---------------------|----------|
| H(67B)-C(67)-H(67C) | 109.5    |
| C(66)-C(68)-H(68A)  | 109.5    |
| C(66)-C(68)-H(68B)  | 109.5    |
| H(68A)-C(68)-H(68B) | 109.5    |
| C(66)-C(68)-H(68C)  | 109.5    |
| H(68A)-C(68)-H(68C) | 109.5    |
| H(68B)-C(68)-H(68C) | 109.5    |
| C(13)-N(1)-C(14)    | 123.6(4) |
| C(13)-N(1)-H(1N)    | 118.2    |
| C(14)-N(1)-H(1N)    | 118.2    |
| C(30)-N(2)-C(31)    | 125.6(3) |
| C(30)-N(2)-H(2N)    | 117.2    |
| C(31)-N(2)-H(2N)    | 117.2    |
| C(47)-N(3)-C(48)    | 122.4(4) |
| C(47)-N(3)-H(3N)    | 118.8    |
| C(48)-N(3)-H(3N)    | 118.8    |
| C(64)-N(4)-C(65)    | 123.2(4) |
| C(64)-N(4)-H(4N)    | 118.4    |
| C(65)-N(4)-H(4N)    | 118.4    |
| C(4)-O(1)-C(7)      | 107.0(3) |
| C(12)-O(2)-C(4)     | 107.9(3) |
| C(9)-O(3)-H(3)      | 109.5    |
| C(11)-O(4)-H(4)     | 109.5    |
| C(18)-O(6)-C(24)    | 109.6(3) |
| C(18)-O(7)-C(29)    | 105.8(3) |
| C(25)-O(8)-H(8)     | 109.5    |
| C(27)-O(9)-H(9)     | 109.5    |
| C(38)-O(11)-C(46)   | 105.3(3) |
| C(38)-O(12)-C(41)   | 109.6(3) |
| C(42)-O(13)-H(13)   | 109.5    |
| C(44)-O(14)-H(14)   | 109.5    |
| C(55)-O(16)-C(58)   | 105.9(3) |
| C(63)-O(17)-C(55)   | 105.7(3) |
| C(60)-O(18)-H(18)   | 109.5    |
| C(62)-O(19)-H(19)   | 109.5    |

---

Symmetry transformations used to generate equivalent atoms:



Table 4. Anisotropic displacement parameters ( $\text{\AA}^2 \times 10^3$ ) for 101129LTB. The anisotropic displacement factor exponent takes the form:  $-2\pi^2 [h^2 a^{*2} U^{11} + \dots + 2 h k a^* b^* U^{12}]$

|       | $U^{11}$ | $U^{22}$ | $U^{33}$ | $U^{23}$ | $U^{13}$ | $U^{12}$ |
|-------|----------|----------|----------|----------|----------|----------|
| C(1)  | 32(3)    | 35(3)    | 22(2)    | -8(2)    | 0(2)     | 14(2)    |
| C(2)  | 24(3)    | 38(3)    | 16(2)    | 4(2)     | 4(2)     | 16(2)    |
| C(3)  | 22(3)    | 29(2)    | 19(2)    | 6(2)     | 2(2)     | 13(2)    |
| C(4)  | 15(2)    | 22(2)    | 15(2)    | 1(2)     | -1(2)    | 11(2)    |
| C(5)  | 19(2)    | 28(2)    | 26(2)    | 7(2)     | 4(2)     | 10(2)    |
| C(6)  | 20(3)    | 22(2)    | 31(3)    | -4(2)    | 0(2)     | 8(2)     |
| C(7)  | 15(2)    | 17(2)    | 20(2)    | 5(2)     | 4(2)     | 12(2)    |
| C(8)  | 18(2)    | 11(2)    | 16(2)    | 4(2)     | 4(2)     | 9(2)     |
| C(9)  | 13(2)    | 19(2)    | 14(2)    | 3(2)     | 2(2)     | 6(2)     |
| C(10) | 20(2)    | 17(2)    | 18(2)    | 5(2)     | 5(2)     | 10(2)    |
| C(11) | 12(2)    | 17(2)    | 22(2)    | 6(2)     | 2(2)     | 9(2)     |
| C(12) | 14(2)    | 19(2)    | 13(2)    | 3(2)     | 2(2)     | 8(2)     |
| C(13) | 13(2)    | 14(2)    | 15(2)    | 4(2)     | 2(2)     | 7(2)     |
| C(14) | 23(2)    | 18(2)    | 18(2)    | 8(2)     | 9(2)     | 15(2)    |
| C(15) | 30(3)    | 25(2)    | 18(2)    | 8(2)     | 8(2)     | 20(2)    |
| C(16) | 33(3)    | 42(3)    | 34(3)    | 14(2)    | 7(2)     | 26(2)    |
| C(17) | 29(3)    | 25(2)    | 33(3)    | 9(2)     | 13(2)    | 15(2)    |
| C(18) | 16(2)    | 31(2)    | 18(2)    | 6(2)     | 3(2)     | 13(2)    |
| C(19) | 25(3)    | 33(3)    | 24(2)    | 12(2)    | 9(2)     | 16(2)    |
| C(20) | 27(3)    | 46(3)    | 20(2)    | 8(2)     | 2(2)     | 17(2)    |
| C(21) | 28(3)    | 36(3)    | 24(3)    | -1(2)    | 2(2)     | 16(2)    |
| C(22) | 34(3)    | 33(3)    | 26(2)    | 0(2)     | 6(2)     | 18(2)    |
| C(23) | 26(3)    | 41(3)    | 21(2)    | 5(2)     | 4(2)     | 21(2)    |
| C(24) | 19(2)    | 22(2)    | 27(2)    | 11(2)    | 8(2)     | 12(2)    |
| C(25) | 12(2)    | 20(2)    | 21(2)    | 4(2)     | 8(2)     | 6(2)     |
| C(26) | 19(2)    | 17(2)    | 21(2)    | 3(2)     | 4(2)     | 12(2)    |
| C(27) | 13(2)    | 16(2)    | 19(2)    | 5(2)     | 3(2)     | 8(2)     |
| C(28) | 13(2)    | 23(2)    | 25(2)    | 8(2)     | 4(2)     | 11(2)    |
| C(29) | 18(2)    | 22(2)    | 23(2)    | 8(2)     | 5(2)     | 13(2)    |
| C(30) | 11(2)    | 18(2)    | 22(2)    | 3(2)     | 2(2)     | 10(2)    |
| C(31) | 16(2)    | 19(2)    | 21(2)    | 3(2)     | 6(2)     | 12(2)    |
| C(32) | 30(3)    | 24(2)    | 24(2)    | 6(2)     | 8(2)     | 19(2)    |
| C(33) | 27(3)    | 50(3)    | 23(2)    | 4(2)     | 4(2)     | 25(2)    |

|       |       |       |       |       |       |       |
|-------|-------|-------|-------|-------|-------|-------|
| C(34) | 40(3) | 45(3) | 23(2) | 9(2)  | 7(2)  | 29(3) |
| C(35) | 38(3) | 26(2) | 14(2) | 0(2)  | 2(2)  | 11(2) |
| C(36) | 42(3) | 27(2) | 14(2) | -2(2) | 7(2)  | 17(2) |
| C(37) | 31(3) | 29(2) | 22(2) | 5(2)  | 8(2)  | 22(2) |
| C(38) | 28(3) | 19(2) | 14(2) | 3(2)  | 6(2)  | 6(2)  |
| C(39) | 28(3) | 24(2) | 14(2) | 3(2)  | 2(2)  | 14(2) |
| C(40) | 27(3) | 30(2) | 21(2) | 2(2)  | 3(2)  | 16(2) |
| C(41) | 16(2) | 18(2) | 19(2) | 7(2)  | 5(2)  | 9(2)  |
| C(42) | 14(2) | 10(2) | 20(2) | 2(2)  | 4(2)  | 5(2)  |
| C(43) | 12(2) | 11(2) | 18(2) | 3(2)  | 3(2)  | 0(2)  |
| C(44) | 10(2) | 12(2) | 20(2) | 3(2)  | 1(2)  | 5(2)  |
| C(45) | 23(2) | 15(2) | 20(2) | 4(2)  | 4(2)  | 13(2) |
| C(46) | 20(2) | 17(2) | 20(2) | 1(2)  | 7(2)  | 11(2) |
| C(47) | 15(2) | 10(2) | 20(2) | 0(2)  | 3(2)  | 4(2)  |
| C(48) | 24(3) | 19(2) | 18(2) | 5(2)  | 3(2)  | 4(2)  |
| C(49) | 18(2) | 32(2) | 20(2) | 2(2)  | 3(2)  | 14(2) |
| C(50) | 28(3) | 38(3) | 19(2) | -1(2) | 3(2)  | 15(2) |
| C(51) | 35(3) | 28(3) | 28(3) | 1(2)  | 4(2)  | 8(2)  |
| C(52) | 33(3) | 44(3) | 18(2) | 5(2)  | 3(2)  | 16(2) |
| C(53) | 25(3) | 39(3) | 21(2) | 5(2)  | 0(2)  | 16(2) |
| C(54) | 22(3) | 29(2) | 18(2) | 4(2)  | 7(2)  | 6(2)  |
| C(55) | 26(3) | 15(2) | 14(2) | 2(2)  | 5(2)  | 11(2) |
| C(56) | 19(2) | 39(3) | 21(2) | 2(2)  | 5(2)  | 17(2) |
| C(57) | 33(3) | 46(3) | 20(2) | 7(2)  | 12(2) | 16(2) |
| C(58) | 16(2) | 22(2) | 19(2) | 0(2)  | 3(2)  | 11(2) |
| C(59) | 21(2) | 17(2) | 19(2) | 2(2)  | 2(2)  | 11(2) |
| C(60) | 10(2) | 15(2) | 18(2) | 3(2)  | 1(2)  | 5(2)  |
| C(61) | 16(2) | 19(2) | 16(2) | 1(2)  | 2(2)  | 11(2) |
| C(62) | 19(2) | 16(2) | 21(2) | 4(2)  | 0(2)  | 6(2)  |
| C(63) | 13(2) | 24(2) | 19(2) | 7(2)  | 3(2)  | 6(2)  |
| C(64) | 13(2) | 21(2) | 17(2) | 3(2)  | 3(2)  | 10(2) |
| C(65) | 19(2) | 26(2) | 18(2) | 3(2)  | 2(2)  | 13(2) |
| C(66) | 24(3) | 22(2) | 17(2) | 4(2)  | 2(2)  | 15(2) |
| C(67) | 26(3) | 27(2) | 27(2) | 6(2)  | 12(2) | 14(2) |
| C(68) | 34(3) | 25(2) | 24(2) | 4(2)  | 9(2)  | 17(2) |
| N(1)  | 13(2) | 21(2) | 16(2) | 4(1)  | 4(1)  | 8(2)  |
| N(2)  | 16(2) | 15(2) | 21(2) | 3(1)  | 4(2)  | 6(2)  |
| N(3)  | 17(2) | 19(2) | 16(2) | 3(1)  | 1(2)  | 7(2)  |

|       |       |       |       |       |       |       |
|-------|-------|-------|-------|-------|-------|-------|
| N(4)  | 18(2) | 16(2) | 15(2) | 1(1)  | 3(1)  | 7(2)  |
| O(1)  | 16(2) | 27(2) | 15(1) | 0(1)  | 3(1)  | 14(1) |
| O(2)  | 17(2) | 25(2) | 15(1) | 0(1)  | 2(1)  | 14(1) |
| O(3)  | 13(2) | 16(1) | 20(2) | 5(1)  | 3(1)  | 4(1)  |
| O(4)  | 18(2) | 21(2) | 23(2) | 4(1)  | 2(1)  | 15(1) |
| O(5)  | 19(2) | 22(2) | 19(2) | 1(1)  | 5(1)  | 5(1)  |
| O(6)  | 19(2) | 38(2) | 21(2) | 5(1)  | 7(1)  | 13(2) |
| O(7)  | 19(2) | 27(2) | 18(2) | 6(1)  | 8(1)  | 12(1) |
| O(8)  | 25(2) | 16(2) | 23(2) | 2(1)  | 7(1)  | 5(1)  |
| O(9)  | 15(2) | 14(1) | 24(2) | -2(1) | 6(1)  | 7(1)  |
| O(10) | 20(2) | 14(1) | 24(2) | 0(1)  | 6(1)  | 6(1)  |
| O(11) | 24(2) | 17(1) | 14(1) | 3(1)  | 3(1)  | 8(1)  |
| O(12) | 24(2) | 19(2) | 16(2) | 5(1)  | 4(1)  | 4(1)  |
| O(13) | 18(2) | 12(1) | 25(2) | 5(1)  | 6(1)  | 5(1)  |
| O(14) | 13(2) | 15(1) | 23(2) | 7(1)  | 3(1)  | 4(1)  |
| O(15) | 21(2) | 26(2) | 23(2) | 6(1)  | 0(1)  | 15(1) |
| O(16) | 25(2) | 19(2) | 16(2) | 2(1)  | 0(1)  | 9(1)  |
| O(17) | 23(2) | 21(2) | 17(2) | 3(1)  | -1(1) | 9(1)  |
| O(18) | 18(2) | 19(2) | 24(2) | 9(1)  | -2(1) | -2(1) |
| O(19) | 30(2) | 17(2) | 22(2) | 6(1)  | -1(1) | -5(1) |
| O(20) | 17(2) | 20(2) | 19(2) | 3(1)  | -1(1) | -1(1) |

---

Table 5. Hydrogen coordinates ( $\times 10^4$ ) and isotropic displacement parameters ( $\text{\AA}^2 \times 10^{-3}$ ) for 101129LTB.

|        | x     | y     | z     | U(eq) |
|--------|-------|-------|-------|-------|
| H(1A)  | 5809  | 10220 | 5113  | 38    |
| H(1B)  | 6820  | 9649  | 4851  | 38    |
| H(2A)  | 4760  | 7874  | 4954  | 31    |
| H(2B)  | 3856  | 8291  | 4258  | 31    |
| H(3A)  | 4085  | 6537  | 3484  | 27    |
| H(3B)  | 5722  | 7320  | 3812  | 27    |
| H(5A)  | 7001  | 9392  | 3156  | 29    |
| H(5B)  | 6088  | 9809  | 2468  | 29    |
| H(6A)  | 5163  | 10378 | 3613  | 32    |
| H(6B)  | 6801  | 11140 | 3936  | 32    |
| H(7)   | 3272  | 5690  | 1736  | 19    |
| H(8A)  | 2950  | 5228  | 234   | 17    |
| H(8B)  | 4560  | 5719  | 580   | 17    |
| H(10A) | 3482  | 8388  | -360  | 21    |
| H(10B) | 2255  | 7073  | -261  | 21    |
| H(11)  | 4340  | 9018  | 1194  | 19    |
| H(12)  | 2055  | 6827  | 1460  | 18    |
| H(14A) | 3480  | 5415  | -2719 | 20    |
| H(14B) | 5075  | 6207  | -2694 | 20    |
| H(15)  | 3910  | 6890  | -3725 | 25    |
| H(16A) | 2625  | 7427  | -2388 | 49    |
| H(16B) | 1884  | 6267  | -3261 | 49    |
| H(16C) | 2441  | 7750  | -3370 | 49    |
| H(17A) | 4952  | 9125  | -3194 | 41    |
| H(17B) | 5997  | 8583  | -2814 | 41    |
| H(17C) | 5161  | 8957  | -2171 | 41    |
| H(19A) | 9394  | 2595  | 3857  | 31    |
| H(19B) | 10178 | 2064  | 3258  | 31    |
| H(20A) | 12126 | 4063  | 3683  | 37    |
| H(20B) | 11706 | 3603  | 4578  | 37    |
| H(21A) | 10709 | 5010  | 4741  | 36    |
| H(21B) | 12250 | 5840  | 4657  | 36    |

|        |       |      |       |    |
|--------|-------|------|-------|----|
| H(22A) | 11488 | 5828 | 3157  | 37 |
| H(22B) | 10703 | 6370 | 3748  | 37 |
| H(23A) | 8747  | 4368 | 3323  | 33 |
| H(23B) | 9171  | 4833 | 2431  | 33 |
| H(24)  | 8074  | 614  | 1509  | 25 |
| H(25)  | 6617  | 1543 | 707   | 22 |
| H(26A) | 8353  | 3524 | 683   | 21 |
| H(26B) | 7583  | 2752 | -330  | 21 |
| H(28A) | 10011 | 1461 | 242   | 23 |
| H(28B) | 11274 | 2856 | 695   | 23 |
| H(29)  | 10348 | 1727 | 1797  | 23 |
| H(31A) | 9614  | 1753 | -2576 | 21 |
| H(31B) | 10968 | 3064 | -2518 | 21 |
| H(32)  | 9576  | 4132 | -2850 | 28 |
| H(33A) | 7182  | 2886 | -3372 | 47 |
| H(33B) | 7645  | 2762 | -2361 | 47 |
| H(33C) | 7288  | 1598 | -3186 | 47 |
| H(34A) | 8953  | 1939 | -4226 | 49 |
| H(34B) | 10297 | 3310 | -4028 | 49 |
| H(34C) | 8818  | 3219 | -4402 | 49 |
| H(35A) | 5811  | 5140 | 4138  | 34 |
| H(35B) | 4845  | 3790 | 4374  | 34 |
| H(36A) | 6701  | 3850 | 5390  | 33 |
| H(36B) | 7100  | 4010 | 4442  | 33 |
| H(37A) | 8463  | 6232 | 4965  | 29 |
| H(37B) | 8918  | 5497 | 5673  | 29 |
| H(39A) | 6829  | 7253 | 5397  | 26 |
| H(39B) | 6428  | 7103 | 6346  | 26 |
| H(40A) | 5059  | 4846 | 5823  | 30 |
| H(40B) | 4586  | 5573 | 5117  | 30 |
| H(41)  | 10617 | 8148 | 7608  | 20 |
| H(42)  | 8141  | 8275 | 7881  | 18 |
| H(43A) | 9209  | 8879 | 9476  | 19 |
| H(43B) | 10386 | 8510 | 9261  | 19 |
| H(45A) | 9723  | 6028 | 8735  | 21 |
| H(45B) | 8126  | 5081 | 8340  | 21 |
| H(46)  | 9516  | 5918 | 7251  | 22 |
| H(48A) | 8735  | 6253 | 11585 | 27 |

|        |       |      |       |    |
|--------|-------|------|-------|----|
| H(48B) | 7126  | 5794 | 11467 | 27 |
| H(49)  | 7553  | 7985 | 11908 | 27 |
| H(50A) | 7456  | 6660 | 12996 | 44 |
| H(50B) | 8413  | 8171 | 13441 | 44 |
| H(50C) | 9090  | 7232 | 13206 | 44 |
| H(51A) | 10395 | 8620 | 12221 | 51 |
| H(51B) | 9813  | 9634 | 12472 | 51 |
| H(51C) | 9603  | 9017 | 11438 | 51 |
| H(52A) | 1372  | 800  | 3975  | 39 |
| H(52B) | 1225  | -501 | 4311  | 39 |
| H(53A) | -157  | 252  | 4950  | 35 |
| H(53B) | 1122  | 1661 | 5353  | 35 |
| H(54A) | 768   | 495  | 6522  | 30 |
| H(54B) | 827   | -703 | 5927  | 30 |
| H(56A) | 3211  | -314 | 5593  | 30 |
| H(56B) | 4475  | 1099 | 6013  | 30 |
| H(57A) | 3583  | 879  | 4448  | 39 |
| H(57B) | 3490  | 2055 | 5048  | 39 |
| H(58)  | 5044  | 1140 | 7489  | 22 |
| H(59A) | 5487  | 1822 | 9020  | 22 |
| H(59B) | 4320  | 347  | 8761  | 22 |
| H(61A) | 2314  | 2127 | 8356  | 19 |
| H(61B) | 3118  | 3204 | 9269  | 19 |
| H(62)  | 3915  | 4048 | 8044  | 24 |
| H(63)  | 5263  | 3106 | 7337  | 23 |
| H(65A) | 5884  | 2696 | 11766 | 24 |
| H(65B) | 5042  | 1273 | 11949 | 24 |
| H(66)  | 4971  | 2846 | 13011 | 23 |
| H(67A) | 2288  | 1244 | 11878 | 38 |
| H(67B) | 2593  | 1923 | 12911 | 38 |
| H(67C) | 3030  | 798  | 12656 | 38 |
| H(68A) | 3601  | 3531 | 11581 | 39 |
| H(68B) | 5134  | 4439 | 12165 | 39 |
| H(68C) | 3869  | 4108 | 12631 | 39 |
| H(1N)  | 5404  | 7356 | -1292 | 19 |
| H(2N)  | 10700 | 3937 | -1202 | 21 |
| H(3N)  | 7187  | 6800 | 10228 | 22 |
| H(4N)  | 3405  | 819  | 10662 | 20 |

|       |       |       |      |    |
|-------|-------|-------|------|----|
| H(3)  | 5720  | 8536  | -17  | 26 |
| H(4)  | 1693  | 8417  | 685  | 28 |
| H(8)  | 7348  | 550   | -545 | 35 |
| H(9)  | 10187 | 4791  | 464  | 27 |
| H(13) | 9570  | 10322 | 8325 | 29 |
| H(14) | 6595  | 5882  | 8662 | 27 |
| H(18) | 1815  | 318   | 8780 | 37 |
| H(19) | 5754  | 3834  | 9251 | 44 |

---
